# Supplementary material for: High-performance deep-blue phosphorescent organic light-emitting diodes enabled by a platinum(II) emitter
Source: Research Square preprint supplement (doi:10.21203/rs.3.rs-5009247/v1), 2024-09-09
Supplement: Supplementary file 1 [file Fig. 3.xlsx]

## Sheet: Fig. 3a
Absorption spectra in dichloromethane
LQS1		PtQS1		PtON-TBBI
600	0.00514	600	0.00112	600	0.000529768
599	0.00411	599	0.00134	599	0
598	0.00514	598	0.00134	598	0
597	0.00514	597	0.00134	597	0.00106
596	0.00514	596	0.00134	596	0.00106
595	0.00514	595	0.00134	595	0.00106
594	0.00566	594	0.00134	594	0.00106
593	0.00566	593	0.00179	593	0.000529768
592	0.00514	592	0.00134	592	0.000529768
591	0.00514	591	0.00134	591	0.000529768
590	0.00514	590	0.00134	590	0.000529768
589	0.00514	589	0.00134	589	0.000529768
588	0.00566	588	0.00134	588	0.00106
587	0.00514	587	0.00134	587	0.00106
586	0.00566	586	0.000894855	586	0.000529768
585	0.00566	585	0.00112	585	0.000529768
584	0.00514	584	0.00134	584	0.00106
583	0.00566	583	0.00112	583	0.00106
582	0.00514	582	0.00157	582	0.000529768
581	0.00514	581	0.00157	581	0.000529768
580	0.00463	580	0.00179	580	0.000529768
579	0.00514	579	0.00179	579	0
578	0.00566	578	0.00157	578	0.000529768
577	0.00514	577	0.00157	577	0.00106
576	0.00463	576	0.00134	576	0.000529768
575	0.00514	575	0.00134	575	0
574	0.00514	574	0.00134	574	0
573	0.00566	573	0.00134	573	0.000529768
572	0.00566	572	0.00134	572	0.000529768
571	0.00566	571	0.00134	571	0.000529768
570	0.00566	570	0.00157	570	0.000529768
569	0.00514	569	0.00157	569	0.000529768
568	0.00566	568	0.00179	568	0.000529768
567	0.00514	567	0.00157	567	0.000529768
566	0.00514	566	0.00157	566	0.00106
565	0.00566	565	0.00134	565	0.000529768
564	0.00566	564	0.00134	564	0.000529768
563	0.00514	563	0.00157	563	0
562	0.00566	562	0.00134	562	0.000529768
561	0.00514	561	0.00157	561	0.000529768
560	0.00514	560	0.00157	560	0.00106
559	0.00514	559	0.00157	559	0.000529768
558	0.00514	558	0.00157	558	0.000529768
557	0.00514	557	0.00157	557	0.00106
556	0.00463	556	0.00157	556	0.00106
555	0.00514	555	0.00157	555	0.00106
554	0.00514	554	0.00134	554	0.00106
553	0.00514	553	0.00134	553	0.00106
552	0.00514	552	0.00157	552	0
551	0.00514	551	0.00157	551	0.00106
550	0.00514	550	0.00179	550	0
549	0.00514	549	0.00179	549	0.000529768
548	0.00514	548	0.00179	548	0.000529768
547	0.00463	547	0.00201	547	0.000529768
546	0.00514	546	0.00157	546	0
545	0.00514	545	0.00157	545	0
544	0.00463	544	0.00157	544	0.00106
543	0.00514	543	0.00157	543	0
542	0.00514	542	0.00179	542	0.000529768
541	0.00411	541	0.00157	541	0.000529768
540	0.00514	540	0.00179	540	0.00106
539	0.00463	539	0.00179	539	0.000529768
538	0.00514	538	0.00179	538	0.000529768
537	0.00463	537	0.00157	537	0.000529768
536	0.00411	536	0.00179	536	0
535	0.00463	535	0.00201	535	0
534	0.00463	534	0.00157	534	0.000529768
533	0.00463	533	0.00179	533	0
532	0.00463	532	0.00157	532	0.000529768
531	0.00463	531	0.00157	531	0.00106
530	0.00463	530	0.00179	530	0.000529768
529	0.00463	529	0.00179	529	0.000529768
528	0.00463	528	0.00179	528	0
527	0.00411	527	0.00179	527	0.000529768
526	0.00411	526	0.00179	526	0.000529768
525	0.00463	525	0.00157	525	0.000529768
524	0.00411	524	0.00179	524	0.000529768
523	0.00411	523	0.00179	523	0.000529768
522	0.00411	522	0.00179	522	0.000529768
521	0.00411	521	0.00157	521	0.000529768
520	0.00463	520	0.00179	520	0.000529768
519	0.00411	519	0.00157	519	0.000529768
518	0.0036	518	0.00179	518	0.000529768
517	0.00411	517	0.00179	517	0.000529768
516	0.0036	516	0.00201	516	0.000529768
515	0.0036	515	0.00179	515	0.000529768
514	0.00411	514	0.00157	514	0.000529768
513	0.00411	513	0.00157	513	0
512	0.00411	512	0.00157	512	0.00106
511	0.0036	511	0.00157	511	0.000529768
510	0.00411	510	0.00201	510	0
509	0.00411	509	0.00157	509	0.000529768
508	0.0036	508	0.00201	508	0.000529768
507	0.00411	507	0.00157	507	0.000529768
506	0.0036	506	0.00179	506	0.000529768
505	0.0036	505	0.00179	505	0
504	0.0036	504	0.00179	504	0.000529768
503	0.0036	503	0.00179	503	0.000529768
502	0.0036	502	0.00179	502	0.00106
501	0.0036	501	0.00179	501	0
500	0.00411	500	0.00179	500	0.00106
499	0.0036	499	0.00157	499	0.000529768
498	0.0036	498	0.00179	498	0.000529768
497	0.0036	497	0.00201	497	0.000529768
496	0.0036	496	0.00179	496	0.000529768
495	0.00309	495	0.00179	495	0.000529768
494	0.0036	494	0.00201	494	0.000529768
493	0.0036	493	0.00201	493	0.00106
492	0.00309	492	0.00201	492	0.00106
491	0.00411	491	0.00201	491	0.000529768
490	0.0036	490	0.00201	490	0.000529768
489	0.00309	489	0.00201	489	0.000529768
488	0.00309	488	0.00201	488	0.000529768
487	0.00309	487	0.00201	487	0.00106
486	0.00309	486	0.00224	486	0.000529768
485	0.0036	485	0.00201	485	0
484	0.0036	484	0.00201	484	0.000529768
483	0.00309	483	0.00201	483	0.000529768
482	0.0036	482	0.00224	482	0.000529768
481	0.00309	481	0.00201	481	0
480	0.00411	480	0.00246	480	0.000529768
479	0.00257	479	0.00179	479	0
478	0.00309	478	0.00201	478	0.000529768
477	0.0036	477	0.00224	477	0.000529768
476	0.00309	476	0.00224	476	0.00106
475	0.00309	475	0.00201	475	0.000529768
474	0.00309	474	0.00246	474	0.000529768
473	0.00309	473	0.00246	473	0.00106
472	0.0036	472	0.00268	472	0.000529768
471	0.00309	471	0.00246	471	0.00106
470	0.00309	470	0.00246	470	0.000529768
469	0.00309	469	0.00246	469	0.00106
468	0.00309	468	0.00291	468	0.000529768
467	0.00309	467	0.00291	467	0.00106
466	0.00309	466	0.00313	466	0.00106
465	0.0036	465	0.00358	465	0.000529768
464	0.00309	464	0.00358	464	0.00106
463	0.00309	463	0.00492	463	0.000529768
462	0.00257	462	0.00559	462	0.00159
461	0.00257	461	0.00649	461	0.00159
460	0.00309	460	0.00738	460	0.00159
459	0.00309	459	0.00872	459	0.00159
458	0.00257	458	0.00962	458	0.00212
457	0.00309	457	0.01074	457	0.00371
456	0.00309	456	0.01208	456	0.00424
455	0.00309	455	0.01342	455	0.00477
454	0.00309	454	0.01409	454	0.0053
453	0.00257	453	0.01432	453	0.00636
452	0.00309	452	0.01432	452	0.00742
451	0.00309	451	0.01409	451	0.00848
450	0.00257	450	0.01365	450	0.01007
449	0.00206	449	0.01387	449	0.0106
448	0.00257	448	0.01342	448	0.01165
447	0.00257	447	0.01365	447	0.01218
446	0.00309	446	0.01342	446	0.01271
445	0.00309	445	0.01387	445	0.01271
444	0.00257	444	0.01432	444	0.01271
443	0.00309	443	0.01477	443	0.01218
442	0.00309	442	0.01521	442	0.01165
441	0.00257	441	0.01588	441	0.01113
440	0.00257	440	0.01678	440	0.01165
439	0.00309	439	0.01767	439	0.01218
438	0.00309	438	0.01902	438	0.01218
437	0.00309	437	0.02036	437	0.01271
436	0.00309	436	0.02237	436	0.01324
435	0.00309	435	0.02483	435	0.01536
434	0.0036	434	0.02819	434	0.01589
433	0.00309	433	0.03199	433	0.01801
432	0.00257	432	0.04295	432	0.02278
431	0.00257	431	0.05011	431	0.02543
430	0.00309	430	0.05817	430	0.02914
429	0.00309	429	0.06779	429	0.03338
428	0.00309	428	0.07875	428	0.03867
427	0.00257	427	0.0906	427	0.04503
426	0.0036	426	0.10425	426	0.05192
425	0.00257	425	0.11902	425	0.0588
424	0.00309	424	0.15235	424	0.07735
423	0.00309	423	0.16957	423	0.089
422	0.00309	422	0.18702	422	0.10066
421	0.00257	421	0.203	421	0.11231
420	0.00309	420	0.22	420	0.1245
419	0.0036	419	0.235	419	0.13774
418	0.0036	418	0.261	418	0.15151
417	0.00309	417	0.271	417	0.16423
416	0.00309	416	0.278	416	0.19019
415	0.0036	415	0.285	415	0.19972
414	0.0036	414	0.289	414	0.21138
413	0.00411	413	0.291	413	0.22038
412	0.00309	412	0.292	412	0.22727
411	0.0036	411	0.297	411	0.23469
410	0.00411	410	0.305	410	0.23893
409	0.00257	409	0.31	409	0.24316
408	0.0036	408	0.318	408	0.24793
407	0.00411	407	0.328	407	0.24899
406	0.0036	406	0.341	406	0.25164
405	0.00411	405	0.357	405	0.25376
404	0.00463	404	0.376	404	0.25694
403	0.00411	403	0.396	403	0.26276
402	0.0036	402	0.446	402	0.26753
401	0.00411	401	0.473	401	0.27548
400	0.00411	400	0.498	400	0.29296
399	0.00411	399	0.525	399	0.30515
398	0.00411	398	0.555	398	0.31574
397	0.00463	397	0.584	397	0.32899
396	0.00463	396	0.613	396	0.3417
395	0.00463	395	0.642	395	0.35494
394	0.0036	394	0.71	394	0.36766
393	0.0036	393	0.745	393	0.37984
392	0.00463	392	0.786	392	0.40421
391	0.00463	391	0.831	391	0.41428
390	0.00463	390	0.882	390	0.42434
389	0.00514	389	0.939	389	0.43653
388	0.00514	388	1.004	388	0.44977
387	0.00566	387	1.078	387	0.46249
386	0.00514	386	1.243	386	0.47891
385	0.00566	385	1.339	385	0.49745
384	0.00617	384	1.432	384	0.54937
383	0.00617	383	1.528	383	0.58116
382	0.00669	382	1.626	382	0.61559
381	0.00669	381	1.708	381	0.65585
380	0.00514	380	1.795	380	0.70141
379	0.00411	379	1.907	379	0.74485
378	0.00617	378	1.948	378	0.80266
377	0.00669	377	1.986	377	0.86139
376	0.00617	376	2.013	376	0.91903
375	0.00771	375	2.029	375	0.97994
374	0.0072	374	2.035	374	1.03432
373	0.00771	373	2.031	373	1.08979
372	0.00874	372	2.02	372	1.18767
371	0.00823	371	1.993	371	1.229
370	0.00874	370	1.969	370	1.25728
369	0.00977	369	1.947	369	1.28338
368	0.00926	368	1.921	368	1.29644
367	0.0108	367	1.889	367	1.30405
366	0.0108	366	1.857	366	1.30405
365	0.01286	365	1.824	365	1.29752
364	0.01697	364	1.76	364	1.26816
363	0.02006	363	1.729	363	1.24423
362	0.02571	362	1.694	362	1.21704
361	0.03085	361	1.656	361	1.19311
360	0.04165	360	1.631	360	1.16701
359	0.05348	359	1.595	359	1.13873
358	0.07199	358	1.565	358	1.11372
357	0.09822	357	1.536	357	1.09088
356	0.18513	356	1.48	356	1.0452
355	0.25403	355	1.456	355	1.02127
354	0.46722	354	1.432	354	1.00387
353	0.62106	353	1.407	353	0.98211
352	0.80481	352	1.393	352	0.96363
351	0.99426	351	1.376	351	0.9484
350	1.19083	350	1.363	350	0.93426
349	1.36034	349	1.348	349	0.92012
348	1.48	348	1.332	348	0.89184
347	1.53982	347	1.327	347	0.87879
346	1.44439	346	1.316	346	0.86683
345	1.33328	345	1.318	345	0.85921
344	1.22217	344	1.307	344	0.84725
343	1.11819	343	1.302	343	0.83855
342	1.04412	342	1.298	342	0.83529
341	0.99853	341	1.296	341	0.8255
340	0.96435	340	1.287	340	0.82659
339	0.95295	339	1.283	339	0.82224
338	0.96007	338	1.28	338	0.83311
337	0.98144	337	1.282	337	0.83529
336	1.01278	336	1.292	336	0.85051
335	1.04981	335	1.302	335	0.86465
334	1.08685	334	1.315	334	0.88205
333	1.12389	333	1.324	333	0.90707
332	1.12531	332	1.344	332	0.93317
331	1.10109	331	1.362	331	0.96036
330	1.05979	330	1.412	330	1.03215
329	0.99996	329	1.439	329	1.07021
328	0.94298	328	1.467	328	1.10828
327	0.8974	327	1.49838	327	1.15287
326	0.86036	326	1.52889	326	1.1855
325	0.8333	325	1.56618	325	1.2203
324	0.82475	324	1.64754	324	1.26054
323	0.83615	323	1.68822	323	1.28338
322	0.86606	322	1.72212	322	1.33124
321	0.9031	321	1.77975	321	1.35517
320	0.94156	320	1.8306	320	1.36713
319	0.99426	319	1.86789	319	1.37801
318	1.04554	318	1.9323	318	1.38127
317	1.10394	317	1.97637	317	1.38236
316	1.25921	316	2.08824	316	1.39106
315	1.36177	315	2.14587	315	1.39432
314	1.48569	314	2.20689	314	1.3965
313	1.64951	313	2.26452	313	1.39758
312	1.83753	312	2.30859	312	1.39323
311	2.0455	311	2.36622	311	1.39541
310	2.24065	310	2.43063	310	1.3965
309	2.42013	309	2.49504	309	1.38671
308	2.61955	308	2.6103	308	1.38671
307	2.64662	307	2.66793	307	1.38127
306	2.65089	306	2.70861	306	1.37257
305	2.65231	305	2.74251	305	1.36387
304	2.6808	304	2.7798	304	1.36713
303	2.71641	303	2.80014	303	1.34864
302	2.76484	302	2.80014	302	1.34429
301	2.81897	301	2.80692	301	1.34211
300	2.92011	300	2.78658	300	1.33559
299	2.95572	299	2.7798	299	1.32906
298	3.007	298	2.75607	298	1.31819
297	3.03406	297	2.74929	297	1.3084
296	3.05686	296	2.74929	296	1.3084
295	3.06398	295	2.73573	295	1.30514
294	3.0654	294	2.73234	294	1.30731
293	3.08392	293	2.72556	293	1.30949
292	3.08107	292	2.72895	292	1.3171
291	3.08677	291	2.71878	291	1.31384
290	3.10386	290	2.72217	290	1.31928
289	3.13235	289	2.73234	289	1.32471
288	3.1352	288	2.74929	288	1.32906
287	3.16939	287	2.76963	287	1.33015
286	3.19787	286	2.79336	286	1.33559
285	3.26625	285	2.84421	285	1.34211
284	3.39017	284	2.94252	284	1.34755
283	3.4557	283	3.00693	283	1.35625
282	3.5198	282	3.08829	282	1.39323
281	3.55114	281	3.17304	281	1.4226
280	3.61524	280	3.26118	280	1.45305
279	3.62663	279	3.37305	279	1.49547
278	3.68076	278	3.4917	278	1.54985
277	3.69501	277	3.61035	277	1.60967
276	3.71495	276	3.86799	276	1.67492
275	3.75483	275	3.99003	275	1.75215
274	3.78475	274	4.13241	274	1.91964
273	3.75768	273	4.27818	273	1.99686
272	3.7819	272	4.39683	272	2.07625
271	3.79614	271	4.50192	271	2.15783
270	3.81466	270	4.59006	270	2.22199
269	3.80469	269	4.66803	269	2.2655
268	3.88161	268	4.87821	268	2.31879
267	3.86024	267	4.94262	267	2.35686
266	3.893	266	4.99347	266	2.4406
265	3.89585	265	5.04771	265	2.46779
264	3.9044	264	5.07822	264	2.49825
263	3.91722	263	5.08839	263	2.5374
262	3.89728	262	5.10534	262	2.56024
261	3.93574	261	5.13585	261	2.5994
260	3.98559	260	5.1867	260	2.61789
259	4.0212	259	5.1867	259	2.64508
258	4.07818	258	5.17992	258	2.69728
257	4.0326	257	5.19348	257	2.72012
256	4.07248	256	5.21043	256	2.72991
255	4.12804	255	5.20026	255	2.73861
254	4.19071	254	5.21721	254	2.76798
253	4.21635	253	5.21382	253	2.80278
252	4.19783	252	5.21721	252	2.82018
251	4.19071	251	5.21382	251	2.81257
250	4.23487	250	5.16636	250	2.85063
249	4.23772	--	--	249	2.83432
248	4.23345	--	--	248	2.82127
247	4.20781	--	--	247	2.83215
246	4.19071	--	--	246	2.84193
245	4.20496	--	--	245	2.82888
244	4.24769	--	--	244	2.81801
243	4.24769	--	--	243	2.81148
242	4.22347	--	--	242	2.82453
241	4.20923	--	--	241	2.86042
240	4.16507	--	--	240	2.82779
239	4.15368	--	--	239	2.8539
238	4.17789	--	--	238	2.82018
237	4.12804	--	--	237	2.81366
236	4.31179	--	--	236	2.84193
235	4.43999	--	--	235	2.92459
234	3.91152	--	--	234	2.71142
233	3.87876	--	--	233	2.669
232	3.94571	--	--	232	2.54393
231	4.09527	--	--	231	2.64725
230	3.81181	--	--	230	2.5461
229	2.63095	--	--	229	2.82453
228	2.17085	--	--	228	1.82066
227	1.88881	--	--	227	1.21378
226	1.49851	--	--	226	0.88205
225	1.53555	--	--	225	0.85378
224	1.2179	--	--	224	0.92012
223	0.59969	--	--	223	0.79831
222	0.70937	--	--	222	0.68628
221	0.73074	--	--	221	0.67215
220	0.99141	--	--	220	0.7374
219	0.94868	--	--	219	0.71347
218	0.62676	--	--	218	0.68411
217	0.82475	--	--	217	0.74937
216	0.80481	--	--	216	0.72653
215	0.85467	--	--	215	0.75372
214	0.8276	--	--	214	0.65801
213	0.79626	--	--	213	0.79505
212	0.76065	--	--	212	0.77329
211	0.65239	--	--	211	0.76024
210	0.62106	--	--	210	0.6145
209	0.88315	--	--	209	0.77221
208	0.75068	--	--	208	0.65148
207	0.5883	--	--	207	0.76459
206	0.73644	--	--	206	0.73196
205	0.76635	--	--	205	0.55795
204	0.78914	--	--	204	0.62755
203	0.76493	--	--	203	0.62103
202	0.68088	--	--	202	0.56556
201	0.61394	--	--	201	0.68085
200	0.76208	--	--	200	0.62755
--	--	--	--	--	--
--	--	--	--	--	--
--	--	--	--	--	--
--	--	--	--	--	--
--	--	--	--	--	--
--	--	--	--	--	--
--	--	--	--	--	--
--	--	--	--	--	--
--	--	--	--	--	--
--	--	--	--	--	--
--	--	--	--	--	--
--	--	--	--	--	--
--	--	--	--	--	--
--	--	--	--	--	--
--	--	--	--	--	--
--	--	--	--	--	--
--	--	--	--	--	--
--	--	--	--	--	--
--	--	--	--	--	--
--	--	--	--	--	--
--	--	--	--	--	--
--	--	--	--	--	--
--	--	--	--	--	--
--	--	--	--	--	--
--	--	--	--	--	--
--	--	--	--	--	--
--	--	--	--	--	--
--	--	--	--	--	--
--	--	--	--	--	--
--	--	--	--	--	--
--	--	--	--	--	--
--	--	--	--	--	--
--	--	--	--	--	--
--	--	--	--	--	--
--	--	--	--	--	--
--	--	--	--	--	--
--	--	--	--	--	--
--	--	--	--	--	--
--	--	--	--	--	--
--	--	--	--	--	--
--	--	--	--	--	--
--	--	--	--	--	--
--	--	--	--	--	--
--	--	--	--	--	--
--	--	--	--	--	--
--	--	--	--	--	--
--	--	--	--	--	--
--	--	--	--	--	--
--	--	--	--	--	--
--	--	--	--	--	--
--	--	--	--	--	--
--	--	--	--	--	--
--	--	--	--	--	--
--	--	--	--	--	--
--	--	--	--	--	--
--	--	--	--	--	--
--	--	--	--	--	--
--	--	--	--	--	--
--	--	--	--	--	--
--	--	--	--	--	--
--	--	--	--	--	--
--	--	--	--	--	--
--	--	--	--	--	--
--	--	--	--	--	--
--	--	--	--	--	--
--	--	--	--	--	--
--	--	--	--	--	--
--	--	--	--	--	--
--	--	--	--	--	--
--	--	--	--	--	--
--	--	--	--	--	--
--	--	--	--	--	--
--	--	--	--	--	--
--	--	--	--	--	--
--	--	--	--	--	--
--	--	--	--	--	--
--	--	--	--	--	--
--	--	--	--	--	--
--	--	--	--	--	--
--	--	--	--	--	--
--	--	--	--	--	--
--	--	--	--	--	--
--	--	--	--	--	--
--	--	--	--	--	--
--	--	--	--	--	--
--	--	--	--	--	--
--	--	--	--	--	--
--	--	--	--	--	--
--	--	--	--	--	--
--	--	--	--	--	--
--	--	--	--	--	--
--	--	--	--	--	--
--	--	--	--	--	--
--	--	--	--	--	--
--	--	--	--	--	--
--	--	--	--	--	--
--	--	--	--	--	--
--	--	--	--	--	--
--	--	--	--	--	--
--	--	--	--	--	--
--	--	--	--	--	--
--	--	--	--	--	--
--	--	--	--	--	--
--	--	--	--	--	--
--	--	--	--	--	--
--	--	--	--	--	--
--	--	--	--	--	--
--	--	--	--	--	--
--	--	--	--	--	--
--	--	--	--	--	--
--	--	--	--	--	--
--	--	--	--	--	--
--	--	--	--	--	--
--	--	--	--	--	--
--	--	--	--	--	--
--	--	--	--	--	--
--	--	--	--	--	--
--	--	--	--	--	--
--	--	--	--	--	--
--	--	--	--	--	--
--	--	--	--	--	--
--	--	--	--	--	--
--	--	--	--	--	--
--	--	--	--	--	--
--	--	--	--	--	--
--	--	--	--	--	--
--	--	--	--	--	--
--	--	--	--	--	--
--	--	--	--	--	--
--	--	--	--	--	--
--	--	--	--	--	--
--	--	--	--	--	--
--	--	--	--	--	--
--	--	--	--	--	--
--	--	--	--	--	--
--	--	--	--	--	--
--	--	--	--	--	--
--	--	--	--	--	--
--	--	--	--	--	--
--	--	--	--	--	--
--	--	--	--	--	--
--	--	--	--	--	--
--	--	--	--	--	--
--	--	--	--	--	--
--	--	--	--	--	--
--	--	--	--	--	--
--	--	--	--	--	--
--	--	--	--	--	--
--	--	--	--	--	--
--	--	--	--	--	--
--	--	--	--	--	--
--	--	--	--	--	--
--	--	--	--	--	--
--	--	--	--	--	--
--	--	--	--	--	--
--	--	--	--	--	--
--	--	--	--	--	--
--	--	--	--	--	--
--	--	--	--	--	--
--	--	--	--	--	--
--	--	--	--	--	--
--	--	--	--	--	--
--	--	--	--	--	--
--	--	--	--	--	--
--	--	--	--	--	--
--	--	--	--	--	--
--	--	--	--	--	--
--	--	--	--	--	--
--	--	--	--	--	--
--	--	--	--	--	--
--	--	--	--	--	--
--	--	--	--	--	--
--	--	--	--	--	--
--	--	--	--	--	--
--	--	--	--	--	--
--	--	--	--	--	--
--	--	--	--	--	--
--	--	--	--	--	--
--	--	--	--	--	--
--	--	--	--	--	--
--	--	--	--	--	--
--	--	--	--	--	--
--	--	--	--	--	--
--	--	--	--	--	--
--	--	--	--	--	--
--	--	--	--	--	--
--	--	--	--	--	--
--	--	--	--	--	--
--	--	--	--	--	--
--	--	--	--	--	--
--	--	--	--	--	--
--	--	--	--	--	--
--	--	--	--	--	--
--	--	--	--	--	--
--	--	--	--	--	--
--	--	--	--	--	--
--	--	--	--	--	--
--	--	--	--	--	--
--	--	--	--	--	--
--	--	--	--	--	--
--	--	--	--	--	--
--	--	--	--	--	--
--	--	--	--	--	--
--	--	--	--	--	--
--	--	--	--	--	--
--	--	--	--	--	--
--	--	--	--	--	--
--	--	--	--	--	--
--	--	--	--	--	--
--	--	--	--	--	--
--	--	--	--	--	--
--	--	--	--	--	--
--	--	--	--	--	--
--	--	--	--	--	--
--	--	--	--	--	--
--	--	--	--	--	--
--	--	--	--	--	--
--	--	--	--	--	--
--	--	--	--	--	--
--	--	--	--	--	--
--	--	--	--	--	--
--	--	--	--	--	--
--	--	--	--	--	--
--	--	--	--	--	--
--	--	--	--	--	--
--	--	--	--	--	--
--	--	--	--	--	--
--	--	--	--	--	--
--	--	--	--	--	--
--	--	--	--	--	--
--	--	--	--	--	--
--	--	--	--	--	--
--	--	--	--	--	--
--	--	--	--	--	--
--	--	--	--	--	--
--	--	--	--	--	--
--	--	--	--	--	--
--	--	--	--	--	--
--	--	--	--	--	--
--	--	--	--	--	--
--	--	--	--	--	--
--	--	--	--	--	--
--	--	--	--	--	--
--	--	--	--	--	--
--	--	--	--	--	--
--	--	--	--	--	--
--	--	--	--	--	--
--	--	--	--	--	--
--	--	--	--	--	--
--	--	--	--	--	--
--	--	--	--	--	--
--	--	--	--	--	--
--	--	--	--	--	--
--	--	--	--	--	--
--	--	--	--	--	--
--	--	--	--	--	--
--	--	--	--	--	--
--	--	--	--	--	--
--	--	--	--	--	--
--	--	--	--	--	--
--	--	--	--	--	--
--	--	--	--	--	--
--	--	--	--	--	--
--	--	--	--	--	--
--	--	--	--	--	--
--	--	--	--	--	--
--	--	--	--	--	--
--	--	--	--	--	--
--	--	--	--	--	--
--	--	--	--	--	--
--	--	--	--	--	--
--	--	--	--	--	--
--	--	--	--	--	--
--	--	--	--	--	--
--	--	--	--	--	--
--	--	--	--	--	--
--	--	--	--	--	--
--	--	--	--	--	--
--	--	--	--	--	--
--	--	--	--	--	--
--	--	--	--	--	--
--	--	--	--	--	--
--	--	--	--	--	--
--	--	--	--	--	--
--	--	--	--	--	--
--	--	--	--	--	--
--	--	--	--	--	--
--	--	--	--	--	--
--	--	--	--	--	--
--	--	--	--	--	--
--	--	--	--	--	--
--	--	--	--	--	--
--	--	--	--	--	--
--	--	--	--	--	--
--	--	--	--	--	--
--	--	--	--	--	--
--	--	--	--	--	--
--	--	--	--	--	--
--	--	--	--	--	--
--	--	--	--	--	--
--	--	--	--	--	--
--	--	--	--	--	--
--	--	--	--	--	--
--	--	--	--	--	--
--	--	--	--	--	--
--	--	--	--	--	--
--	--	--	--	--	--
--	--	--	--	--	--
--	--	--	--	--	--
--	--	--	--	--	--
--	--	--	--	--	--
--	--	--	--	--	--
--	--	--	--	--	--
--	--	--	--	--	--
--	--	--	--	--	--
--	--	--	--	--	--
--	--	--	--	--	--
--	--	--	--	--	--
--	--	--	--	--	--
--	--	--	--	--	--
--	--	--	--	--	--
--	--	--	--	--	--
--	--	--	--	--	--
--	--	--	--	--	--
--	--	--	--	--	--
--	--	--	--	--	--
--	--	--	--	--	--
--	--	--	--	--	--
--	--	--	--	--	--
--	--	--	--	--	--
--	--	--	--	--	--
--	--	--	--	--	--
--	--	--	--	--	--
--	--	--	--	--	--
--	--	--	--	--	--
--	--	--	--	--	--
--	--	--	--	--	--
--	--	--	--	--	--
--	--	--	--	--	--
--	--	--	--	--	--
--	--	--	--	--	--
--	--	--	--	--	--
--	--	--	--	--	--
--	--	--	--	--	--
--	--	--	--	--	--
--	--	--	--	--	--
--	--	--	--	--	--
--	--	--	--	--	--
--	--	--	--	--	--
--	--	--	--	--	--
--	--	--	--	--	--
--	--	--	--	--	--
--	--	--	--	--	--
--	--	--	--	--	--
--	--	--	--	--	--
--	--	--	--	--	--
--	--	--	--	--	--
--	--	--	--	--	--
--	--	--	--	--	--
--	--	--	--	--	--
--	--	--	--	--	--
--	--	--	--	--	--
--	--	--	--	--	--
--	--	--	--	--	--
--	--	--	--	--	--
--	--	--	--	--	--
--	--	--	--	--	--
--	--	--	--	--	--
--	--	--	--	--	--
--	--	--	--	--	--
--	--	--	--	--	--
--	--	--	--	--	--
--	--	--	--	--	--
--	--	--	--	--	--
--	--	--	--	--	--
--	--	--	--	--	--
--	--	--	--	--	--
--	--	--	--	--	--
--	--	--	--	--	--
--	--	--	--	--	--
--	--	--	--	--	--
--	--	--	--	--	--
--	--	--	--	--	--
--	--	--	--	--	--
--	--	--	--	--	--
--	--	--	--	--	--
--	--	--	--	--	--
--	--	--	--	--	--
--	--	--	--	--	--
--	--	--	--	--	--
--	--	--	--	--	--
--	--	--	--	--	--
--	--	--	--	--	--
--	--	--	--	--	--
--	--	--	--	--	--
--	--	--	--	--	--
--	--	--	--	--	--
--	--	--	--	--	--
--	--	--	--	--	--
--	--	--	--	--	--
--	--	--	--	--	--
--	--	--	--	--	--
--	--	--	--	--	--
--	--	--	--	--	--
--	--	--	--	--	--
--	--	--	--	--	--
--	--	--	--	--	--
--	--	--	--	--	--
--	--	--	--	--	--
--	--	--	--	--	--
--	--	--	--	--	--
--	--	--	--	--	--
--	--	--	--	--	--
--	--	--	--	--	--
--	--	--	--	--	--
--	--	--	--	--	--
--	--	--	--	--	--
--	--	--	--	--	--
--	--	--	--	--	--
--	--	--	--	--	--
--	--	--	--	--	--
--	--	--	--	--	--
--	--	--	--	--	--
--	--	--	--	--	--
--	--	--	--	--	--
--	--	--	--	--	--
--	--	--	--	--	--
--	--	--	--	--	--
--	--	--	--	--	--
--	--	--	--	--	--
--	--	--	--	--	--
--	--	--	--	--	--
--	--	--	--	--	--
--	--	--	--	--	--
--	--	--	--	--	--
--	--	--	--	--	--
--	--	--	--	--	--
--	--	--	--	--	--
--	--	--	--	--	--
--	--	--	--	--	--
--	--	--	--	--	--
--	--	--	--	--	--
--	--	--	--	--	--
--	--	--	--	--	--
--	--	--	--	--	--
--	--	--	--	--	--
--	--	--	--	--	--
--	--	--	--	--	--
--	--	--	--	--	--
--	--	--	--	--	--
--	--	--	--	--	--
--	--	--	--	--	--
--	--	--	--	--	--
--	--	--	--	--	--
--	--	--	--	--	--
--	--	--	--	--	--
--	--	--	--	--	--
--	--	--	--	--	--
--	--	--	--	--	--
--	--	--	--	--	--
--	--	--	--	--	--
--	--	--	--	--	--
--	--	--	--	--	--
--	--	--	--	--	--
--	--	--	--	--	--
--	--	--	--	--	--
--	--	--	--	--	--
--	--	--	--	--	--
--	--	--	--	--	--
--	--	--	--	--	--
--	--	--	--	--	--
--	--	--	--	--	--
--	--	--	--	--	--
--	--	--	--	--	--
--	--	--	--	--	--
--	--	--	--	--	--
--	--	--	--	--	--
--	--	--	--	--	--
--	--	--	--	--	--
--	--	--	--	--	--
--	--	--	--	--	--
--	--	--	--	--	--
--	--	--	--	--	--
--	--	--	--	--	--
--	--	--	--	--	--
--	--	--	--	--	--
--	--	--	--	--	--
--	--	--	--	--	--
--	--	--	--	--	--
--	--	--	--	--	--
--	--	--	--	--	--
--	--	--	--	--	--
--	--	--	--	--	--
--	--	--	--	--	--
--	--	--	--	--	--
--	--	--	--	--	--
--	--	--	--	--	--
--	--	--	--	--	--
--	--	--	--	--	--
--	--	--	--	--	--
--	--	--	--	--	--

## Sheet: Fig. 3b
Photoluminescence (PL) spectra of PtON-TBBI
at 77K		at room temperature
370	0.000517437	390	0.000171001
370.2	0.000426283	390.2	0.000170195
370.4	0.000434326	390.4	0.000167086
370.6	0.000447731	390.6	0.00016294
370.8	0.000512075	390.8	0.000161213
371	0.000396791	391	0.000163055
371.2	0.000407515	391.2	0.000163976
371.4	0.00044505	391.4	0.000167201
371.6	0.000512075	391.6	0.000162249
371.8	0.000479903	391.8	0.000172037
372	0.000439688	392	0.00017077
372.2	0.000431645	392.2	0.000169964
372.4	0.000455774	392.4	0.000167086
372.6	0.000383386	392.6	0.000171922
372.8	0.00039411	392.8	0.000176067
373	0.000386067	393	0.000177795
373.2	0.000453093	393.2	0.000184704
373.4	0.000391429	393.4	0.000176528
373.6	0.000412877	393.6	0.000177564
373.8	0.000404834	393.8	0.00017411
374	0.000361938	394	0.000178716
374.2	0.000356576	394.2	0.000185395
374.4	0.000364619	394.4	0.000190461
374.6	0.000410196	394.6	0.000193916
374.8	0.000426283	394.8	0.00019288
375	0.000423602	395	0.000193801
375.2	0.000437007	395.2	0.000195758
375.4	0.000359257	395.4	0.000194492
375.6	0.00031368	395.6	0.000195183
375.8	0.00028955	395.8	0.000198061
376	0.000327085	396	0.000203013
376.2	0.000286869	396.2	0.000200825
376.4	0.000308318	396.4	0.000207504
376.6	0.000324404	396.6	0.000211419
376.8	0.000364619	396.8	0.000213952
377	0.000308318	397	0.000209922
377.2	0.000396791	397.2	0.000214298
377.4	0.000321723	397.4	0.000212916
377.6	0.000329766	397.6	0.000214298
377.8	0.000281507	397.8	0.000214643
378	0.000302956	398	0.000222589
378.2	0.000265421	398.2	0.00023111
378.4	0.000316361	398.4	0.00023468
378.6	0.000396791	398.6	0.000237904
378.8	0.000386067	398.8	0.000236983
379	0.000455774	399	0.000243086
379.2	0.000351214	399.2	0.000248383
379.4	0.000345852	399.4	0.000247577
379.6	0.000324404	399.6	0.000249995
379.8	0.000321723	399.8	0.000255177
380	0.000332447	400	0.000263237
380.2	0.000308318	400.2	0.00026865
380.4	0.000276145	400.4	0.000277747
380.6	0.000372662	400.6	0.000277056
380.8	0.000359257	400.8	0.000288571
381	0.000292231	401	0.000291219
381.2	0.0003673	401.2	0.00029928
381.4	0.000351214	401.4	0.000308147
381.6	0.000353895	401.6	0.000313213
381.8	0.000399472	401.8	0.000309183
382	0.000319042	402	0.000314135
382.2	0.000308318	402.2	0.000316898
382.4	0.000257378	402.4	0.000322541
382.6	0.000254697	402.6	0.000336704
382.8	0.00034049	402.8	0.00034442
383	0.00028955	403	0.000353401
383.2	0.000246654	403.2	0.000363304
383.4	0.000308318	403.4	0.000368026
383.6	0.000337809	403.6	0.000377468
383.8	0.000292231	403.8	0.000384032
384	0.00026274	404	0.000398886
384.2	0.000276145	404.2	0.000404529
384.4	0.000270783	404.4	0.000419959
384.6	0.000260059	404.6	0.000425487
384.8	0.000375343	404.8	0.00042848
385	0.000308318	405	0.000435044
385.2	0.000335128	405.2	0.000449899
385.4	0.000310999	405.4	0.000460493
385.6	0.000321723	405.6	0.000470396
385.8	0.000359257	405.8	0.000489281
386	0.000324404	406	0.000494002
386.2	0.000278826	406.2	0.000503675
386.4	0.000329766	406.4	0.000518875
386.6	0.000337809	406.6	0.000535917
386.8	0.000337809	406.8	0.000544784
387	0.000270783	407	0.000569657
387.2	0.000284188	407.2	0.000579099
387.4	0.000252016	407.4	0.000607657
387.6	0.000345852	407.6	0.00061756
387.8	0.000359257	407.8	0.000637942
388	0.000302956	408	0.000658439
388.2	0.000230568	408.2	0.000686421
388.4	0.000297594	408.4	0.000716476
388.6	0.00028955	408.6	0.000739967
388.8	0.000281507	408.8	0.000765991
389	0.000278826	409	0.000781191
389.2	0.000238611	409.2	0.000813779
389.4	0.000238611	409.4	0.000838537
389.6	0.000193034	409.6	0.000869973
389.8	0.000292231	409.8	0.000897264
390	0.000297594	410	0.000932386
390.2	0.000268102	410.2	0.000944707
390.4	0.000243973	410.4	0.001
390.6	0.000276145	410.6	0.00103
390.8	0.000265421	410.8	0.00107
391	0.000257378	411	0.0011
391.2	0.000273464	411.2	0.00115
391.4	0.00031368	411.4	0.0012
391.6	0.000249335	411.6	0.00125
391.8	0.000211801	411.8	0.00128
392	0.00026274	412	0.00134
392.2	0.00023593	412.2	0.00139
392.4	0.000227887	412.4	0.00144
392.6	0.000174266	412.6	0.00148
392.8	0.000257378	412.8	0.00155
393	0.000249335	413	0.00161
393.2	0.000243973	413.2	0.00167
393.4	0.000230568	413.4	0.00174
393.6	0.00026274	413.6	0.00182
393.8	0.000201077	413.8	0.00188
394	0.000217163	414	0.00196
394.2	0.000176947	414.2	0.00203
394.4	0.000211801	414.4	0.00211
394.6	0.000211801	414.6	0.00219
394.8	0.000233249	414.8	0.00228
395	0.000265421	415	0.00235
395.2	0.000198396	415.2	0.00246
395.4	0.000217163	415.4	0.00254
395.6	0.000187672	415.6	0.00264
395.8	0.000193034	415.8	0.00273
396	0.000281507	416	0.00284
396.2	0.000380705	416.2	0.00292
396.4	0.000345852	416.4	0.00304
396.6	0.000410196	416.6	0.00315
396.8	0.000375343	416.8	0.00331
397	0.000327085	417	0.00341
397.2	0.00034049	417.2	0.00359
397.4	0.000270783	417.4	0.00371
397.6	0.000281507	417.6	0.00387
397.8	0.000278826	417.8	0.00399
398	0.000415559	418	0.00417
398.2	0.00039411	418.2	0.00432
398.4	0.000335128	418.4	0.00451
398.6	0.000321723	418.6	0.00463
398.8	0.000294912	418.8	0.00479
399	0.000286869	419	0.00493
399.2	0.000243973	419.2	0.00513
399.4	0.000195715	419.4	0.00528
399.6	0.000198396	419.6	0.00551
399.8	0.000176947	419.8	0.00568
400	0.000211801	420	0.00588
400.2	0.00020912	420.2	0.00602
400.4	0.00026274	420.4	0.0062
400.6	0.000270783	420.6	0.00638
400.8	0.000233249	420.8	0.00663
401	0.000214482	421	0.00686
401.2	0.000297594	421.2	0.00712
401.4	0.000412877	421.4	0.00734
401.6	0.000396791	421.6	0.00758
401.8	0.000353895	421.8	0.00777
402	0.000329766	422	0.00801
402.2	0.00034049	422.2	0.00822
402.4	0.000273464	422.4	0.00854
402.6	0.000168904	422.6	0.00874
402.8	0.000219844	422.8	0.00905
403	0.000206439	423	0.00932
403.2	0.000254697	423.2	0.0096
403.4	0.000260059	423.4	0.00982
403.6	0.00026274	423.6	0.01011
403.8	0.000308318	423.8	0.01035
404	0.000388748	424	0.01067
404.2	0.000305637	424.2	0.01088
404.4	0.00031368	424.4	0.01125
404.6	0.000343171	424.6	0.01151
404.8	0.000297594	424.8	0.01181
405	0.000257378	425	0.01202
405.2	0.000302956	425.2	0.0124
405.4	0.000278826	425.4	0.01268
405.6	0.000241292	425.6	0.01304
405.8	0.000260059	425.8	0.01333
406	0.00023593	426	0.01372
406.2	0.000300275	426.2	0.01401
406.4	0.000270783	426.4	0.01437
406.6	0.000278826	426.6	0.01462
406.8	0.000265421	426.8	0.01502
407	0.000222525	427	0.0153
407.2	0.000230568	427.2	0.01574
407.4	0.000214482	427.4	0.0161
407.6	0.000203758	427.6	0.01651
407.8	0.000203758	427.8	0.01683
408	0.000184991	428	0.01721
408.2	0.000168904	428.2	0.0175
408.4	0.000123327	428.4	0.01791
408.6	0.000206439	428.6	0.01833
408.8	0.000222525	428.8	0.0188
409	0.000292231	429	0.01917
409.2	0.000327085	429.2	0.01963
409.4	0.000348533	429.4	0.01995
409.6	0.000369981	429.6	0.02045
409.8	0.000270783	429.8	0.0209
410	0.000219844	430	0.02139
410.2	0.000225206	430.2	0.02176
410.4	0.000160861	430.4	0.02231
410.6	0.000227887	430.6	0.02275
410.8	0.000206439	430.8	0.02335
411	0.000257378	431	0.02379
411.2	0.000243973	431.2	0.02434
411.4	0.000276145	431.4	0.02482
411.6	0.000238611	431.6	0.02549
411.8	0.000152818	431.8	0.02596
412	0.000179629	432	0.02669
412.2	0.000155499	432.2	0.0273
412.4	0.000176947	432.4	0.02808
412.6	0.000222525	432.6	0.02872
412.8	0.000292231	432.8	0.02955
413	0.000217163	433	0.03018
413.2	0.000222525	433.2	0.03101
413.4	0.000241292	433.4	0.03172
413.6	0.000222525	433.6	0.03276
413.8	0.000233249	433.8	0.03353
414	0.000260059	434	0.03468
414.2	0.00028955	434.2	0.03553
414.4	0.000305637	434.4	0.0367
414.6	0.000252016	434.6	0.0375
414.8	0.000268102	434.8	0.03872
415	0.000230568	435	0.03962
415.2	0.00026274	435.2	0.04101
415.4	0.000254697	435.4	0.04211
415.6	0.0003673	435.6	0.04357
415.8	0.000276145	435.8	0.04475
416	0.000190353	436	0.04638
416.2	0.000201077	436.2	0.04761
416.4	0.000198396	436.4	0.04929
416.6	0.000310999	436.6	0.05076
416.8	0.000268102	436.8	0.05288
417	0.000230568	437	0.05453
417.2	0.000337809	437.2	0.05706
417.4	0.000335128	437.4	0.05899
417.6	0.000252016	437.6	0.06159
417.8	0.000233249	437.8	0.06366
418	0.000184991	438	0.06644
418.2	0.000190353	438.2	0.06858
418.4	0.000225206	438.4	0.07178
418.6	0.000281507	438.6	0.07437
418.8	0.000305637	438.8	0.07802
419	0.000324404	439	0.08089
419.2	0.000294912	439.2	0.08481
419.4	0.000260059	439.4	0.08778
419.6	0.000187672	439.6	0.09183
419.8	0.00023593	439.8	0.09507
420	0.00026274	440	0.09981
420.2	0.000225206	440.2	0.10366
420.4	0.000241292	440.4	0.10931
420.6	0.000227887	440.6	0.11381
420.8	0.00026274	440.8	0.12001
421	0.000278826	441	0.12461
421.2	0.000348533	441.2	0.13118
421.4	0.00028955	441.4	0.13636
421.6	0.000286869	441.6	0.14396
421.8	0.000431645	441.8	0.15006
422	0.000343171	442	0.15905
422.2	0.000329766	442.2	0.16618
422.4	0.000410196	442.4	0.17586
422.6	0.000423602	442.6	0.183
422.8	0.000378024	442.8	0.19267
423	0.000327085	443	0.20038
423.2	0.000361938	443.2	0.21144
423.4	0.000396791	443.4	0.22008
423.6	0.000348533	443.6	0.23251
423.8	0.000281507	443.8	0.24207
424	0.000219844	444	0.25508
424.2	0.000246654	444.2	0.26464
424.4	0.000351214	444.4	0.27673
424.6	0.000359257	444.6	0.28686
424.8	0.000359257	444.8	0.30103
425	0.000329766	445	0.31243
425.2	0.0003673	445.2	0.32855
425.4	0.000383386	445.4	0.34145
425.6	0.000396791	445.6	0.35803
425.8	0.000329766	445.8	0.37046
426	0.000364619	446	0.38682
426.2	0.000343171	446.2	0.39971
426.4	0.00034049	446.4	0.41745
426.6	0.000353895	446.6	0.43196
426.8	0.000386067	446.8	0.4513
427	0.000420921	447	0.46696
427.2	0.000383386	447.2	0.48677
427.4	0.000359257	447.4	0.50151
427.6	0.000348533	447.6	0.52062
427.8	0.000305637	447.8	0.53548
428	0.000324404	448	0.55505
428.2	0.000391429	448.2	0.57198
428.4	0.000302956	448.4	0.59236
428.6	0.000297594	448.6	0.6094
428.8	0.000273464	448.8	0.62933
429	0.000284188	449	0.64418
429.2	0.000310999	449.2	0.66284
429.4	0.000343171	449.4	0.67746
429.6	0.000276145	449.6	0.69623
429.8	0.000348533	449.8	0.71166
430	0.000348533	450	0.73054
430.2	0.000356576	450.2	0.74574
430.4	0.000378024	450.4	0.76394
430.6	0.000343171	450.6	0.77741
430.8	0.000324404	450.8	0.79376
431	0.000246654	451	0.8062
431.2	0.000257378	451.2	0.82232
431.4	0.000292231	451.4	0.8351
431.6	0.000364619	451.6	0.85065
431.8	0.000396791	451.8	0.86343
432	0.000369981	452	0.87805
432.2	0.000514756	452.2	0.88842
432.4	0.00060323	452.4	0.90028
432.6	0.000772135	452.6	0.90926
432.8	0.00078554	452.8	0.92124
433	0.00076141	453	0.92999
433.2	0.00068098	453.2	0.93978
433.4	0.000651489	453.4	0.94841
433.6	0.000675618	453.6	0.95762
433.8	0.000729238	453.8	0.96373
434	0.000871332	454	0.96995
434.2	0.000906186	454.2	0.97559
434.4	0.000930315	454.4	0.98146
434.6	0.000941039	454.6	0.98538
434.8	0.00119	454.8	0.98895
435	0.00126	455	0.99217
435.2	0.00151	455.2	0.99539
435.4	0.00161	455.4	0.99747
435.6	0.00189	455.6	0.9977
435.8	0.00242	455.8	0.99942
436	0.00262	456	1
436.2	0.00271	456.2	1
436.4	0.00323	456.4	0.99885
436.6	0.0037	456.6	0.99758
436.8	0.00466	456.8	0.99574
437	0.00544	457	0.99413
437.2	0.00688	457.2	0.9909
437.4	0.00791	457.4	0.98848
437.6	0.00996	457.6	0.98468
437.8	0.01197	457.8	0.98181
438	0.01483	458	0.97616
438.2	0.01694	458.2	0.97225
438.4	0.02157	458.4	0.96707
438.6	0.02535	458.6	0.96327
438.8	0.03151	458.8	0.9567
439	0.03716	459	0.9521
439.2	0.04617	459.2	0.94622
439.4	0.05427	459.4	0.94127
439.6	0.0662	459.6	0.93298
439.8	0.07599	459.8	0.92653
440	0.09304	460	0.91916
440.2	0.10658	460.2	0.91375
440.4	0.13116	460.4	0.90581
440.6	0.15028	460.6	0.89993
440.8	0.1784	460.8	0.8921
441	0.20215	461	0.88519
441.2	0.23484	461.2	0.87587
441.4	0.26288	461.4	0.8685
441.6	0.30213	461.6	0.85963
441.8	0.33564	461.8	0.85238
442	0.38229	462	0.84328
442.2	0.42197	462.2	0.83637
442.4	0.47184	462.4	0.82704
442.6	0.51205	462.6	0.81921
442.8	0.56326	462.8	0.80908
443	0.59758	463	0.80136
443.2	0.64503	463.2	0.79157
443.4	0.68578	463.4	0.78455
443.6	0.73109	463.6	0.77511
443.8	0.76782	463.8	0.76854
444	0.81394	464	0.75933
444.2	0.84745	464.2	0.75196
444.4	0.87399	464.4	0.74229
444.6	0.90134	464.6	0.73434
444.8	0.93163	464.8	0.7249
445	0.95067	465	0.71799
445.2	0.96488	465.2	0.70901
445.4	0.9815	465.4	0.70222
445.6	0.99008	465.6	0.6937
445.8	1	465.8	0.68656
446	0.9992	466	0.67769
446.2	0.99946	466.2	0.67055
446.4	0.99303	466.4	0.66226
446.6	0.98204	466.6	0.65581
446.8	0.96836	466.8	0.64729
447	0.95764	467	0.64084
447.2	0.93807	467.2	0.63301
447.4	0.91742	467.4	0.62691
447.6	0.89249	467.6	0.61862
447.8	0.87453	467.8	0.61194
448	0.84343	468	0.60434
448.2	0.81903	468.2	0.59927
448.4	0.78364	468.4	0.59236
448.6	0.75844	468.6	0.58707
448.8	0.72841	468.8	0.58096
449	0.70509	469	0.57578
449.2	0.67265	469.2	0.56899
449.4	0.6512	469.4	0.56392
449.6	0.626	469.6	0.55816
449.8	0.59946	469.8	0.55379
450	0.56809	470	0.54814
450.2	0.5453	470.2	0.54423
450.4	0.51608	470.4	0.53928
450.6	0.49838	470.6	0.53548
450.8	0.47398	470.8	0.5303
451	0.45656	471	0.52626
451.2	0.43564	471.2	0.52189
451.4	0.42036	471.4	0.51809
451.6	0.39865	471.6	0.51394
451.8	0.38015	471.8	0.51095
452	0.36218	472	0.5075
452.2	0.34851	472.2	0.50439
452.4	0.33189	472.4	0.5007
452.6	0.3209	472.6	0.49794
452.8	0.30588	472.8	0.49494
453	0.29462	473	0.49287
453.2	0.28095	473.2	0.48999
453.4	0.2713	473.4	0.48769
453.6	0.26181	473.6	0.4855
453.8	0.25551	473.8	0.48366
454	0.24647	474	0.48124
454.2	0.24006	474.2	0.47951
454.4	0.23103	474.4	0.47813
454.6	0.224	474.6	0.47686
454.8	0.21706	474.8	0.47537
455	0.21384	475	0.47422
455.2	0.20717	475.2	0.47318
455.4	0.2028	475.4	0.47249
455.6	0.19805	475.6	0.47134
455.8	0.19384	475.8	0.47042
456	0.19001	476	0.46961
456.2	0.18634	476.2	0.46903
456.4	0.18269	476.4	0.46857
456.6	0.17996	476.6	0.46777
456.8	0.17792	476.8	0.46731
457	0.17612	477	0.46708
457.2	0.17368	477.2	0.46662
457.4	0.17055	477.4	0.4665
457.6	0.16757	477.6	0.4665
457.8	0.16403	477.8	0.46639
458	0.16127	478	0.46662
458.2	0.15682	478.2	0.46627
458.4	0.15333	478.4	0.46639
458.6	0.15231	478.6	0.46662
458.8	0.15076	478.8	0.46639
459	0.14861	479	0.46627
459.2	0.14599	479.2	0.46662
459.4	0.14392	479.4	0.46708
459.6	0.1406	479.6	0.46719
459.8	0.13832	479.8	0.46673
460	0.13583	480	0.46708
460.2	0.13341	480.2	0.46685
460.4	0.13266	480.4	0.4665
460.6	0.13159	480.6	0.4665
460.8	0.12899	480.8	0.46685
461	0.1266	481	0.46685
461.2	0.12368	481.2	0.46662
461.4	0.12237	481.4	0.46639
461.6	0.12036	481.6	0.46639
461.8	0.11869	481.8	0.46662
462	0.11701	482	0.46581
462.2	0.11507	482.2	0.46546
462.4	0.11306	482.4	0.46512
462.6	0.11111	482.6	0.46489
462.8	0.1099	482.8	0.46385
463	0.10856	483	0.46293
463.2	0.10711	483.2	0.46201
463.4	0.10524	483.4	0.46155
463.6	0.10548	483.6	0.46063
463.8	0.10416	483.8	0.45971
464	0.10365	484	0.45867
464.2	0.10277	484.2	0.45763
464.4	0.10196	484.4	0.45614
464.6	0.10092	484.6	0.45499
464.8	0.1021	484.8	0.45326
465	0.10255	485	0.45222
465.2	0.10247	485.2	0.45038
465.4	0.10301	485.4	0.44854
465.6	0.10389	485.6	0.44646
465.8	0.10526	485.8	0.4452
466	0.10518	486	0.44313
466.2	0.10687	486.2	0.4414
466.4	0.10746	486.4	0.43909
466.6	0.10861	486.6	0.43737
466.8	0.11068	486.8	0.43472
467	0.1125	487	0.43253
467.2	0.11601	487.2	0.42965
467.4	0.11749	487.4	0.42723
467.6	0.12215	487.6	0.42447
467.8	0.12459	487.8	0.42228
468	0.12698	488	0.41917
468.2	0.13033	488.2	0.4171
468.4	0.13175	488.4	0.41376
468.6	0.13454	488.6	0.411
468.8	0.13878	488.8	0.40777
469	0.14331	489	0.40559
469.2	0.14872	489.2	0.40202
469.4	0.1525	489.4	0.39891
469.6	0.15601	489.6	0.3958
469.8	0.15752	489.8	0.39349
470	0.16248	490	0.38981
470.2	0.16757	490.2	0.38636
470.4	0.17248	490.4	0.3829
470.6	0.17639	490.6	0.38037
470.8	0.18108	490.8	0.37668
471	0.18663	491	0.37369
471.2	0.19033	491.2	0.37035
471.4	0.19553	491.4	0.3677
471.6	0.20079	491.6	0.36356
471.8	0.20304	491.8	0.36022
472	0.20867	492	0.35653
472.2	0.21486	492.2	0.354
472.4	0.21599	492.4	0.35008
472.6	0.21862	492.6	0.34697
472.8	0.22336	492.8	0.34317
473	0.22376	493	0.34041
473.2	0.22805	493.2	0.33638
473.4	0.22974	493.4	0.33292
473.6	0.22923	493.6	0.32889
473.8	0.23283	493.8	0.32625
474	0.23358	494	0.32268
474.2	0.23194	494.2	0.31945
474.4	0.23395	494.4	0.31588
474.6	0.2351	494.6	0.313
474.8	0.23494	494.8	0.30897
475	0.23779	495	0.30586
475.2	0.23572	495.2	0.30229
475.4	0.2358	495.4	0.29953
475.6	0.23602	495.6	0.29585
475.8	0.23312	495.8	0.29297
476	0.23049	496	0.28905
476.2	0.22795	496.2	0.28617
476.4	0.22701	496.4	0.28249
476.6	0.22462	496.6	0.27926
476.8	0.22167	496.8	0.27581
477	0.22159	497	0.27316
477.2	0.2162	497.2	0.26948
477.4	0.21293	497.4	0.26648
477.6	0.21049	497.6	0.26291
477.8	0.20803	497.8	0.26015
478	0.20213	498	0.25669
478.2	0.19773	498.2	0.2537
478.4	0.19382	498.4	0.25059
478.6	0.19242	498.6	0.24817
478.8	0.18969	498.8	0.24495
479	0.18564	499	0.24253
479.2	0.18199	499.2	0.23954
479.4	0.17912	499.4	0.237
479.6	0.17333	499.6	0.23378
479.8	0.16974	499.8	0.23102
480	0.1654	500	0.22802
480.2	0.16325	500.2	0.22595
480.4	0.15813	500.4	0.22318
480.6	0.15526	500.6	0.22123
480.8	0.15004	500.8	0.21858
481	0.14711	501	0.21651
481.2	0.1417	501.2	0.21351
481.4	0.13982	501.4	0.21098
481.6	0.13634	501.6	0.20845
481.8	0.13258	501.8	0.20637
482	0.12792	502	0.20418
482.2	0.12521	502.2	0.20223
482.4	0.1202	502.4	0.19981
482.6	0.11813	502.6	0.19774
482.8	0.11513	502.8	0.19532
483	0.1121	503	0.19336
483.2	0.10802	503.2	0.19106
483.4	0.10556	503.4	0.18945
483.6	0.10247	503.6	0.18726
483.8	0.10003	503.8	0.18541
484	0.09617	504	0.18323
484.2	0.09341	504.2	0.18173
484.4	0.09001	504.4	0.17989
484.6	0.08893	504.6	0.17816
484.8	0.08593	504.8	0.17597
485	0.08483	505	0.17459
485.2	0.08247	505.2	0.17286
485.4	0.08011	505.4	0.17148
485.6	0.07784	505.6	0.16975
485.8	0.07566	505.8	0.16837
486	0.07414	506	0.16665
486.2	0.07314	506.2	0.16549
486.4	0.07076	506.4	0.16377
486.6	0.06939	506.6	0.1625
486.8	0.06585	506.8	0.161
487	0.06566	507	0.15985
487.2	0.06446	507.2	0.15824
487.4	0.06338	507.4	0.15709
487.6	0.06084	507.6	0.15559
487.8	0.05915	507.8	0.15455
488	0.05692	508	0.15317
488.2	0.05596	508.2	0.15214
488.4	0.05529	508.4	0.15098
488.6	0.05475	508.6	0.15006
488.8	0.05392	508.8	0.14868
489	0.05296	509	0.14776
489.2	0.05137	509.2	0.14661
489.4	0.05094	509.4	0.14546
489.6	0.0496	509.6	0.14431
489.8	0.04918	509.8	0.14338
490	0.04821	510	0.14246
490.2	0.04751	510.2	0.14131
490.4	0.04601	510.4	0.14028
490.6	0.04507	510.6	0.13947
490.8	0.04489	510.8	0.13843
491	0.0436	511	0.13763
491.2	0.04269	511.2	0.13659
491.4	0.0414	511.4	0.1359
491.6	0.04057	511.6	0.13475
491.8	0.0407	511.8	0.13394
492	0.04044	512	0.13302
492.2	0.03985	512.2	0.13221
492.4	0.0388	512.4	0.13129
492.6	0.03832	512.6	0.13049
492.8	0.03829	512.8	0.12968
493	0.038	513	0.12899
493.2	0.03679	513.2	0.12807
493.4	0.0369	513.4	0.12738
493.6	0.03649	513.6	0.12669
493.8	0.03566	513.8	0.12588
494	0.0351	514	0.12519
494.2	0.03556	514.2	0.12438
494.4	0.03443	514.4	0.12335
494.6	0.03427	514.6	0.12277
494.8	0.03424	514.8	0.12208
495	0.03427	515	0.12139
495.2	0.03408	515.2	0.12047
495.4	0.03312	515.4	0.11978
495.6	0.03341	515.6	0.11897
495.8	0.03354	515.8	0.1184
496	0.03338	516	0.11748
496.2	0.03277	516.2	0.1169
496.4	0.03306	516.4	0.11609
496.6	0.03269	516.6	0.11552
496.8	0.0317	516.8	0.11467
497	0.03196	517	0.11403
497.2	0.03135	517.2	0.11305
497.4	0.03159	517.4	0.11239
497.6	0.0318	517.6	0.11163
497.8	0.03164	517.8	0.1109
498	0.03242	518	0.1104
498.2	0.03218	518.2	0.10976
498.4	0.03204	518.4	0.10894
498.6	0.03175	518.6	0.10844
498.8	0.03178	518.8	0.10756
499	0.03228	519	0.1068
499.2	0.03277	519.2	0.10608
499.4	0.03274	519.4	0.10549
499.6	0.03234	519.6	0.10467
499.8	0.03215	519.8	0.10398
500	0.03183	520	0.10308
500.2	0.0325	520.2	0.10242
500.4	0.03296	520.4	0.10166
500.6	0.03253	520.6	0.10094
500.8	0.03277	520.8	0.10019
501	0.03306	521	0.09971
501.2	0.03309	521.2	0.09876
501.4	0.03387	521.4	0.09816
501.6	0.03341	521.6	0.09742
501.8	0.03435	521.8	0.09669
502	0.03529	522	0.0958
502.2	0.03542	522.2	0.09499
502.4	0.03542	522.4	0.09417
502.6	0.03515	522.6	0.09365
502.8	0.03574	522.8	0.09284
503	0.03663	523	0.09207
503.2	0.03706	523.2	0.0912
503.4	0.0373	523.4	0.09056
503.6	0.03724	523.6	0.08982
503.8	0.03786	523.8	0.08899
504	0.03786	524	0.08815
504.2	0.03867	524.2	0.08759
504.4	0.03912	524.4	0.0868
504.6	0.03915	524.6	0.0862
504.8	0.0392	524.8	0.08528
505	0.0392	525	0.08465
505.2	0.0388	525.2	0.08384
505.4	0.03899	525.4	0.08319
505.6	0.03853	525.6	0.0823
505.8	0.03931	525.8	0.08176
506	0.04009	526	0.08089
506.2	0.04041	526.2	0.08036
506.4	0.04086	526.4	0.07941
506.6	0.04049	526.6	0.07868
506.8	0.04052	526.8	0.07782
507	0.0407	527	0.0772
507.2	0.04127	527.2	0.07635
507.4	0.04105	527.4	0.07573
507.6	0.0406	527.6	0.07497
507.8	0.04052	527.8	0.07442
508	0.03958	528	0.07352
508.2	0.03958	528.2	0.0729
508.4	0.03944	528.4	0.07219
508.6	0.03907	528.6	0.07145
508.8	0.03915	528.8	0.07056
509	0.03859	529	0.06993
509.2	0.03724	529.2	0.06926
509.4	0.03674	529.4	0.0686
509.6	0.03631	529.6	0.06772
509.8	0.03708	529.8	0.06714
510	0.03716	530	0.06642
510.2	0.03706	530.2	0.06575
510.4	0.03698	530.4	0.06491
510.6	0.03607	530.6	0.06437
510.8	0.03631	530.8	0.06365
511	0.03593	531	0.06303
511.2	0.03548	531.2	0.06229
511.4	0.03494	531.4	0.06178
511.6	0.03462	531.6	0.06117
511.8	0.03427	531.8	0.0605
512	0.03365	532	0.05962
512.2	0.03234	532.2	0.05897
512.4	0.03153	532.4	0.05831
512.6	0.03033	532.6	0.05783
512.8	0.03025	532.8	0.05703
513	0.02971	533	0.05656
513.2	0.02939	533.2	0.05594
513.4	0.02912	533.4	0.05544
513.6	0.02864	533.6	0.05482
513.8	0.02794	533.8	0.05434
514	0.02765	534	0.05369
514.2	0.02684	534.2	0.05313
514.4	0.02672	534.4	0.05256
514.6	0.02563	534.6	0.05202
514.8	0.0251	534.8	0.05142
515	0.02452	535	0.05081
515.2	0.0244	535.2	0.05017
515.4	0.02382	535.4	0.04966
515.6	0.02324	535.6	0.0491
515.8	0.02295	535.8	0.04874
516	0.02259	536	0.04819
516.2	0.02213	536.2	0.0478
516.4	0.02189	536.4	0.04726
516.6	0.02191	536.6	0.04676
516.8	0.02079	536.8	0.04617
517	0.0211	537	0.04572
517.2	0.02061	537.2	0.04522
517.4	0.0207	537.4	0.0448
517.6	0.01975	537.6	0.04419
517.8	0.01954	537.8	0.04371
518	0.01889	538	0.04321
518.2	0.01862	538.2	0.04281
518.4	0.01802	538.4	0.0423
518.6	0.01815	538.6	0.04194
518.8	0.01752	538.8	0.04157
519	0.01736	539	0.04123
519.2	0.01688	539.2	0.04069
519.4	0.01695	539.4	0.04031
519.6	0.0163	539.6	0.03987
519.8	0.01587	539.8	0.03939
520	0.01544	540	0.03898
520.2	0.01554	540.2	0.03857
520.4	0.01462	540.4	0.03824
520.6	0.01424	540.6	0.03786
520.8	0.0138	540.8	0.03743
521	0.01379	541	0.03715
521.2	0.01421	541.2	0.03673
521.4	0.01345	541.4	0.03642
521.6	0.01371	541.6	0.03591
521.8	0.01347	541.8	0.03557
522	0.01293	542	0.03516
522.2	0.01242	542.2	0.03485
522.4	0.01217	542.4	0.03446
522.6	0.0119	542.6	0.03421
522.8	0.01214	542.8	0.03378
523	0.01139	543	0.03351
523.2	0.01146	543.2	0.0331
523.4	0.01144	543.4	0.0328
523.6	0.01082	543.6	0.03244
523.8	0.01042	543.8	0.03215
524	0.01018	544	0.03189
524.2	0.01008	544.2	0.03156
524.4	0.00956	544.4	0.03127
524.6	0.00929	544.6	0.03102
524.8	0.00939	544.8	0.03062
525	0.00928	545	0.03043
525.2	0.00922	545.2	0.03016
525.4	0.00883	545.4	0.02997
525.6	0.00891	545.6	0.02961
525.8	0.00892	545.8	0.02938
526	0.00883	546	0.02905
526.2	0.00884	546.2	0.02876
526.4	0.00834	546.4	0.0285
526.6	0.00813	546.6	0.02823
526.8	0.00781	546.8	0.02792
527	0.00785	547	0.02771
527.2	0.00773	547.2	0.0274
527.4	0.0075	547.4	0.02723
527.6	0.00756	547.6	0.02699
527.8	0.00732	547.8	0.02676
528	0.00721	548	0.02651
528.2	0.00695	548.2	0.02639
528.4	0.00664	548.4	0.02623
528.6	0.00671	548.6	0.02604
528.8	0.0068	548.8	0.02584
529	0.00658	549	0.02563
529.2	0.00644	549.2	0.02539
529.4	0.00644	549.4	0.02525
529.6	0.00641	549.6	0.02496
529.8	0.0064	549.8	0.02473
530	0.00641	550	0.02452
530.2	0.00605	550.2	0.02437
530.4	0.00596	550.4	0.02421
530.6	0.00609	550.6	0.02406
530.8	0.00601	550.8	0.02382
531	0.00582	551	0.02365
531.2	0.00585	551.2	0.02345
531.4	0.00558	551.4	0.02328
531.6	0.00571	551.6	0.02309
531.8	0.0057	551.8	0.02302
532	0.0055	552	0.02277
532.2	0.00538	552.2	0.02264
532.4	0.00528	552.4	0.02246
532.6	0.00526	552.6	0.02227
532.8	0.00555	552.8	0.02201
533	0.00554	553	0.02186
533.2	0.00526	553.2	0.02167
533.4	0.00524	553.4	0.02151
533.6	0.00517	553.6	0.0213
533.8	0.00498	553.8	0.02122
534	0.00494	554	0.02107
534.2	0.00493	554.2	0.02094
534.4	0.00507	554.4	0.02075
534.6	0.0049	554.6	0.0206
534.8	0.00473	554.8	0.02036
535	0.00448	555	0.02022
535.2	0.00441	555.2	0.0201
535.4	0.00447	555.4	0.01995
535.6	0.00477	555.6	0.01976
535.8	0.00482	555.8	0.01962
536	0.00485	556	0.01941
536.2	0.00487	556.2	0.01922
536.4	0.00485	556.4	0.01904
536.6	0.00487	556.6	0.01892
536.8	0.00539	556.8	0.01873
537	0.00485	557	0.01857
537.2	0.00477	557.2	0.01842
537.4	0.0048	557.4	0.01829
537.6	0.00477	557.6	0.01812
537.8	0.00464	557.8	0.018
538	0.00449	558	0.01781
538.2	0.00488	558.2	0.01772
538.4	0.00469	558.4	0.01749
538.6	0.0048	558.6	0.01734
538.8	0.00477	558.8	0.0172
539	0.00475	559	0.01704
539.2	0.00486	559.2	0.01692
539.4	0.00474	559.4	0.01677
539.6	0.00443	559.6	0.0166
539.8	0.00454	559.8	0.01654
540	0.00461	560	0.01631
540.2	0.00476	560.2	0.01619
540.4	0.00473	560.4	0.01599
540.6	0.00488	560.6	0.01585
540.8	0.00469	560.8	0.01565
541	0.00493	561	0.01555
541.2	0.00508	561.2	0.01538
541.4	0.00505	561.4	0.01524
541.6	0.00517	561.6	0.01507
541.8	0.00496	561.8	0.01493
542	0.00493	562	0.01482
542.2	0.005	562.2	0.01469
542.4	0.00499	562.4	0.01452
542.6	0.00508	562.6	0.0144
542.8	0.00481	562.8	0.01424
543	0.00474	563	0.01416
543.2	0.00473	563.2	0.01398
543.4	0.00469	563.4	0.0138
543.6	0.00466	563.6	0.0137
543.8	0.00469	563.8	0.0136
544	0.00476	564	0.01345
544.2	0.00464	564.2	0.01333
544.4	0.00459	564.4	0.01321
544.6	0.00453	564.6	0.01308
544.8	0.00479	564.8	0.01292
545	0.00464	565	0.01277
545.2	0.00467	565.2	0.01262
545.4	0.0045	565.4	0.01251
545.6	0.0042	565.6	0.01233
545.8	0.0041	565.8	0.01219
546	0.00413	566	0.01209
546.2	0.00419	566.2	0.01201
546.4	0.00439	566.4	0.01183
546.6	0.00445	566.6	0.01174
546.8	0.00434	566.8	0.01163
547	0.00417	567	0.01149
547.2	0.00428	567.2	0.01132
547.4	0.00436	567.4	0.01122
547.6	0.00456	567.6	0.01108
547.8	0.00442	567.8	0.01098
548	0.00465	568	0.01083
548.2	0.00455	568.2	0.01071
548.4	0.00467	568.4	0.0106
548.6	0.0046	568.6	0.01051
548.8	0.00449	568.8	0.01036
549	0.00446	569	0.01023
549.2	0.00455	569.2	0.01015
549.4	0.00439	569.4	0.01007
549.6	0.00418	569.6	0.00994
549.8	0.00409	569.8	0.00985
550	0.0039	570	0.00968
550.2	0.00384	570.2	0.00955
550.4	0.00377	570.4	0.00942
550.6	0.00388	570.6	0.00932
550.8	0.00413	570.8	0.00918
551	0.00436	571	0.00909
551.2	0.00412	571.2	0.00899
551.4	0.00371	571.4	0.00887
551.6	0.00343	571.6	0.00875
551.8	0.00325	571.8	0.00869
552	0.00339	572	0.00855
552.2	0.00324	572.2	0.00839
552.4	0.00351	572.4	0.00832
552.6	0.0034	572.6	0.00824
552.8	0.00344	572.8	0.00815
553	0.00329	573	0.0081
553.2	0.00319	573.2	0.00798
553.4	0.00304	573.4	0.00785
553.6	0.00293	573.6	0.00775
553.8	0.00293	573.8	0.00763
554	0.00314	574	0.00753
554.2	0.00327	574.2	0.00745
554.4	0.00328	574.4	0.00739
554.6	0.00314	574.6	0.0073
554.8	0.003	574.8	0.00719
555	0.0028	575	0.00709
555.2	0.00283	575.2	0.00698
555.4	0.0026	575.4	0.0069
555.6	0.00265	575.6	0.00682
555.8	0.00273	575.8	0.00676
556	0.00253	576	0.00665
556.2	0.00238	576.2	0.00657
556.4	0.00227	576.4	0.00648
556.6	0.00235	576.6	0.00639
556.8	0.00226	576.8	0.0063
557	0.00237	577	0.00622
557.2	0.00248	577.2	0.00612
557.4	0.00225	577.4	0.00604
557.6	0.00237	577.6	0.00596
557.8	0.00235	577.8	0.00589
558	0.00242	578	0.00578
558.2	0.00248	578.2	0.00575
558.4	0.00232	578.4	0.00566
558.6	0.00222	578.6	0.00562
558.8	0.0022	578.8	0.00555
559	0.00232	579	0.00553
559.2	0.00224	579.2	0.00546
559.4	0.00223	579.4	0.00534
559.6	0.002	579.6	0.00525
559.8	0.00205	579.8	0.00522
560	0.00168	580	0.00515
560.2	0.00159	580.2	0.00507
560.4	0.00154	580.4	0.00501
560.6	0.0015	580.6	0.00496
560.8	0.00163	580.8	0.00488
561	0.00157	581	0.00486
561.2	0.00153	581.2	0.00479
561.4	0.00143	581.4	0.00471
561.6	0.00149	581.6	0.00464
561.8	0.00147	581.8	0.00458
562	0.00146	582	0.00453
562.2	0.00157	582.2	0.0045
562.4	0.0014	582.4	0.00442
562.6	0.00151	582.6	0.00438
562.8	0.00157	582.8	0.00432
563	0.00157	583	0.00424
563.2	0.00147	583.2	0.00419
563.4	0.00131	583.4	0.00415
563.6	0.0014	583.6	0.00408
563.8	0.00131	583.8	0.00406
564	0.00123	584	0.00401
564.2	0.00105	584.2	0.00397
564.4	0.00125	584.4	0.0039
564.6	0.00143	584.6	0.00387
564.8	0.00123	584.8	0.00385
565	0.00129	585	0.0038
565.2	0.00123	585.2	0.00374
565.4	0.00123	585.4	0.00371
565.6	0.00123	585.6	0.00364
565.8	0.00121	585.8	0.00359
566	0.00137	586	0.00355
566.2	0.00117	586.2	0.0035
566.4	0.00113	586.4	0.00344
566.6	0.00112	586.6	0.00341
566.8	0.000954444	586.8	0.00339
567	0.00102	587	0.00335
567.2	0.00112	587.2	0.0033
567.4	0.00101	587.4	0.00326
567.6	0.000991978	587.6	0.00324
567.8	0.000965168	587.8	0.0032
568	0.00113	588	0.00316
568.2	0.00111	588.2	0.00312
568.4	0.00104	588.4	0.00308
568.6	0.00107	588.6	0.00305
568.8	0.000957125	588.8	0.00302
569	0.000924953	589	0.003
569.2	0.000903505	589.2	0.00295
569.4	0.000860608	589.4	0.00294
569.6	0.000815031	589.6	0.0029
569.8	0.000965168	589.8	0.00288
570	0.000863289	590	0.00284
570.2	0.000871332	590.2	0.00282
570.4	0.00083916	590.4	0.00277
570.6	0.000924953	590.6	0.00273
570.8	0.000836479	590.8	0.00272
571	0.000723876	591	0.00271
571.2	0.000739962	591.2	0.00268
571.4	0.000694385	591.4	0.00265
571.6	0.000579101	591.6	0.00262
571.8	0.000546929	591.8	0.00259
572	0.000670256	592	0.00255
572.2	0.000597868	592.2	0.00253
572.4	0.000613954	592.4	0.0025
572.6	0.00063004	592.6	0.00248
572.8	0.000589825	592.8	0.00245
573	0.000560334	593	0.00241
573.2	0.000487946	593.2	0.00238
573.4	0.000517437	593.4	0.00238
573.6	0.000538886	593.6	0.00235
573.8	0.000627359	593.8	0.00231
574	0.000646126	594	0.00229
574.2	0.000589825	594.2	0.00227
574.4	0.000605911	594.4	0.00226
574.6	0.000748005	594.6	0.00225
574.8	0.000697066	594.8	0.00221
575	0.000595187	595	0.00221
575.2	0.00060323	595.2	0.00218
575.4	0.000506713	595.4	0.00216
575.6	0.000546929	595.6	0.00213
575.8	0.000520118	595.8	0.00213
576	0.000506713	596	0.0021
576.2	0.000624678	596.2	0.00207
576.4	0.000589825	596.4	0.00205
576.6	0.000546929	596.6	0.00202
576.8	0.000573739	596.8	0.00199
577	0.000597868	597	0.00197
577.2	0.000487946	597.2	0.00197
577.4	0.000568377	597.4	0.00195
577.6	0.000571058	597.6	0.00193
577.8	0.000512075	597.8	0.00195
578	0.000485265	598	0.00191
578.2	0.000434326	598.2	0.0019
578.4	0.000461136	598.4	0.00187
578.6	0.00041824	598.6	0.00185
578.8	0.000504032	598.8	0.00182
579	0.000565696	599	0.00181
579.2	0.000509394	599.2	0.0018
579.4	0.000504032	599.4	0.00179
579.6	0.000458455	599.6	0.00177
579.8	0.000565696	599.8	0.00174
580	0.000479903	600	0.00172
580.2	0.000437007	600.2	0.00171
580.4	0.00047186	600.4	0.0017
580.6	0.000466498	600.6	0.00168
580.8	0.000477222	600.8	0.00165
581	0.000426283	601	0.00164
581.2	0.000595187	601.2	0.00163
581.4	0.000573739	601.4	0.00162
581.6	0.000501351	601.6	0.0016
581.8	0.000447731	601.8	0.00158
582	0.000455774	602	0.00157
582.2	0.000410196	602.2	0.00154
582.4	0.000407515	602.4	0.00153
582.6	0.000407515	602.6	0.00152
582.8	0.000375343	602.8	0.0015
583	0.000386067	603	0.00148
583.2	0.000327085	603.2	0.00145
583.4	0.000316361	603.4	0.00145
583.6	0.000369981	603.6	0.00142
583.8	0.000348533	603.8	0.00142
584	0.000458455	604	0.0014
584.2	0.000415559	604.2	0.0014
584.4	0.000375343	604.4	0.00138
584.6	0.000420921	604.6	0.00136
584.8	0.000410196	604.8	0.00135
585	0.00044505	605	0.00135
585.2	0.000428964	605.2	0.00133
585.4	0.00044505	605.4	0.00131
585.6	0.000474541	605.6	0.00129
585.8	0.000632721	605.8	0.00128
586	0.000517437	606	0.00126
586.2	0.000415559	606.2	0.00126
586.4	0.000372662	606.4	0.00126
586.6	0.000369981	606.6	0.00125
586.8	0.000396791	606.8	0.00123
587	0.000434326	607	0.00122
587.2	0.000372662	607.2	0.0012
587.4	0.000378024	607.4	0.00119
587.6	0.000305637	607.6	0.00118
587.8	0.000308318	607.8	0.00116
588	0.000361938	608	0.00116
588.2	0.000428964	608.2	0.00116
588.4	0.000380705	608.4	0.00115
588.6	0.000415559	608.6	0.00114
588.8	0.000447731	608.8	0.00113
589	0.000485265	609	0.0011
589.2	0.000388748	609.2	0.00108
589.4	0.000359257	609.4	0.00108
589.6	0.000396791	609.6	0.00108
589.8	0.000410196	609.8	0.00108
590	0.000490627	610	0.00106
590.2	0.000477222	610.2	0.00104
590.4	0.000437007	610.4	0.00103
590.6	0.000391429	610.6	0.00102
590.8	0.00041824	610.8	0.000999289
591	0.000343171	611	0.000988234
591.2	0.000364619	611.2	0.000977295
591.4	0.00044505	611.4	0.000969925
591.6	0.00041824	611.6	0.00096244
591.8	0.000375343	611.8	0.00095841
592	0.000402153	612	0.000949889
592.2	0.000305637	612.2	0.000935495
592.4	0.000327085	612.4	0.000929852
592.6	0.000327085	612.6	0.000923519
592.8	0.000310999	612.8	0.000911082
593	0.000308318	613	0.000907167
593.2	0.000300275	613.2	0.00090187
593.4	0.000276145	613.4	0.000892082
593.6	0.000243973	613.6	0.000884828
593.8	0.000300275	613.8	0.000877228
594	0.000260059	614	0.000863409
594.2	0.000294912	614.2	0.000854888
594.4	0.000281507	614.4	0.000843143
594.6	0.000348533	614.6	0.00083347
594.8	0.000463817	614.8	0.000817579
595	0.000412877	615	0.000807676
595.2	0.000490627	615.2	0.000800306
595.4	0.000434326	615.4	0.000793973
595.6	0.000402153	615.6	0.000789827
595.8	0.000294912	615.8	0.000781421
596	0.000380705	616	0.000767373
596.2	0.000308318	616.2	0.000758621
596.4	0.000254697	616.4	0.000756318
596.6	0.000278826	616.6	0.000754476
596.8	0.000252016	616.8	0.000737894
597	0.000217163	617	0.000729833
597.2	0.000270783	617.2	0.000718203
597.4	0.000270783	617.4	0.000702888
597.6	0.000241292	617.6	0.000692754
597.8	0.000219844	617.8	0.00068976
598	0.000268102	618	0.000675712
598.2	0.000321723	618.2	0.000669494
598.4	0.000412877	618.4	0.000669954
598.6	0.000415559	618.6	0.00066293
598.8	0.000308318	618.8	0.000661548
599	0.000268102	619	0.000662009
599.2	0.000252016	619.2	0.000649803
599.4	0.000249335	619.4	0.000639324
599.6	0.000252016	619.6	0.000632645
599.8	0.000246654	619.8	0.000636675
600	0.000211801	620	0.000637251
600.2	0.000195715	620.2	0.000629421
600.4	0.000198396	620.4	0.000609615
600.6	0.000254697	620.6	0.000609269
600.8	0.000252016	620.8	0.000603281
601	0.000265421	621	0.000599827
601.2	0.000227887	621.2	0.000591305
601.4	0.000168904	621.4	0.00058739
601.6	0.00015818	621.6	0.000590614
601.8	0.000171585	621.8	0.000588772
602	0.000168904	622	0.000573227
602.2	0.000174266	622.2	0.00056459
602.4	0.000139413	622.4	0.000559754
602.6	0.000139413	622.6	0.000557336
602.8	0.000136732	622.8	0.00055676
603	0.000246654	623	0.000548354
603.2	0.00026274	623.2	0.000535572
603.4	0.000217163	623.4	0.000524748
603.6	0.000147456	623.6	0.000529008
603.8	0.000147456	623.8	0.000517954
604	0.000179629	624	0.000501487
604.2	0.000203758	624.2	0.00048859
604.4	0.000284188	624.4	0.00048882
604.6	0.000241292	624.6	0.000486056
604.8	0.000359257	624.8	0.000473159
605	0.000324404	625	0.000480414
605.2	0.000243973	625.2	0.000473275
605.4	0.000246654	625.4	0.000465905
605.6	0.000308318	625.6	0.000458075
605.8	0.000233249	625.8	0.000457153
606	0.000179629	626	0.000451281
606.2	0.000139413	626.2	0.000440456
606.4	0.000155499	626.4	0.000441953
606.6	0.000147456	626.6	0.000437462
606.8	0.000166223	626.8	0.000428826
607	0.000163542	627	0.000432626
607.2	0.00020912	627.2	0.000429402
607.4	0.000222525	627.4	0.000427559
607.6	0.000214482	627.6	0.000422377
607.8	0.000193034	627.8	0.000413971
608	0.000246654	628	0.000406717
608.2	0.000308318	628.2	0.000404874
608.4	0.000219844	628.4	0.000401189
608.6	0.000195715	628.6	0.000396468
608.8	0.000123327	628.8	0.000398541
609	0.00015818	629	0.00038622
609.2	0.000134051	629.2	0.000379886
609.4	9.91978e-05	629.4	0.000375511
609.6	0.000150137	629.6	0.000373208
609.8	0.000109922	629.8	0.000372056
610	0.000187672	630	0.000371135
610.2	0.000222525	630.2	0.00035962
610.4	0.000184991	630.4	0.000360195
610.6	0.000168904	630.6	0.000351674
610.8	0.000128689	630.8	0.000342232
611	0.000123327	631	0.00034062
611.2	0.00015818	631.2	0.000343498
611.4	0.00013137	631.4	0.000342232
611.6	0.00015818	631.6	0.000338892
611.8	0.000142094	631.8	0.000328759
612	0.00013137	632	0.000321965
612.2	0.000147456	632.2	0.000323001
612.4	0.000134051	632.4	0.00031425
612.6	0.000128689	632.6	0.000312753
612.8	0.000147456	632.8	0.000312407
613	0.000152818	633	0.00030331
613.2	0.000109922	633.2	0.000304347
613.4	0.00015818	633.4	0.000304232
613.6	0.000206439	633.6	0.000300201
613.8	0.000260059	633.8	0.000294328
614	0.000217163	634	0.000296977
614.2	0.000123327	634.2	0.000290068
614.4	0.000179629	634.4	0.000285001
614.6	0.000184991	634.6	0.000286498
614.8	0.000179629	634.8	0.000284541
615	0.000160861	635	0.000284541
615.2	0.000155499	635.2	0.000273716
615.4	0.000179629	635.4	0.000268189
615.6	0.000152818	635.6	0.000265771
615.8	8.57927e-05	635.8	0.000268074
616	0.000115284	636	0.000263583
616.2	0.000214482	636.2	0.00026554
616.4	0.000198396	636.4	0.000260589
616.6	0.000187672	636.6	0.000256098
616.8	0.000150137	636.8	0.000253565
617	0.000101879	637	0.000246886
617.2	0.000152818	637.2	0.000239631
617.4	0.000233249	637.4	0.000241934
617.6	0.000190353	637.6	0.000235946
617.8	0.000144775	637.8	0.000238019
618	0.000147456	638	0.000236983
618.2	0.000163542	638.2	0.000236868
618.4	9.38358e-05	638.4	0.000238365
618.6	4.02153e-05	638.6	0.000238019
618.8	7.50686e-05	638.8	0.000229613
619	0.000101879	639	0.000223855
619.2	9.65168e-05	639.2	0.000221437
619.4	0.000166223	639.4	0.000214874
619.6	0.000171585	639.6	0.000211419
619.8	0.000238611	639.8	0.000211649
620	0.00020912	640	0.000212916
620.2	0.000222525	640.2	0.000207043
620.4	0.00018231	640.4	0.000211074
620.6	0.000147456	640.6	0.000211649
620.8	0.000225206	640.8	0.000211649
621	0.000217163	641	0.000210843
621.2	0.000136732	641.2	0.000206122
621.4	0.000152818	641.4	0.000200134
621.6	0.000176947	641.6	0.000196795
621.8	0.000150137	641.8	0.000193916
622	0.000134051	642	0.000196104
622.2	9.11548e-05	642.2	0.000198292
622.4	7.77497e-05	642.4	0.000195067
622.6	7.77497e-05	642.6	0.000191383
622.8	8.57927e-05	642.8	0.000188043
623	0.000126008	643	0.000191728
623.2	0.000150137	643.2	0.000188734
623.4	9.11548e-05	643.4	0.000188734
623.6	8.31117e-05	643.6	0.00018597
623.8	0.000107241	643.8	0.000178486
624	0.000126008	644	0.000175146
624.2	0.000109922	644.2	0.000176643
624.4	0.000123327	644.4	0.000180673
624.6	0.000134051	644.6	0.000176067
624.8	0.000147456	644.8	0.000180558
625	0.000101879	645	0.000167892
625.2	0.000155499	645.2	0.00016317
625.4	0.000134051	645.4	0.000159255
625.6	7.77497e-05	645.6	0.000162825
625.8	2.94912e-05	645.8	0.00015557
626	5.36205e-06	646	0.000155225
626.2	1.07241e-05	646.2	0.000150619
626.4	6.70256e-05	646.4	0.00015154
626.6	6.97066e-05	646.6	0.000150158
626.8	0.00010456	646.8	0.000150388
627	9.38358e-05	647	0.000151079
627.2	6.16635e-05	647.2	0.000151885
627.4	7.23876e-05	647.4	0.000149813
627.6	8.31117e-05	647.6	0.000149237
627.8	6.43445e-05	647.8	0.000157873
628	4.02153e-05	648	0.00015154
628.2	5.63015e-05	648.2	0.000146588
628.4	9.38358e-05	648.4	0.00014371
628.6	0.000120646	648.6	0.00014014
628.8	9.65168e-05	648.8	0.000143249
629	8.84737e-05	649	0.000136916
629.2	9.91978e-05	649.2	0.000133116
629.4	9.65168e-05	649.4	0.000130352
629.6	0.000193034	649.6	0.000133691
629.8	0.000126008	649.8	0.000138182
630	0.000134051	650	0.000135073
630.2	0.000136732	650.2	0.000136916
630.4	7.77497e-05	650.4	0.000135994
630.6	5.09394e-05	650.6	0.000136455
630.8	6.16635e-05	650.8	0.000136685
631	0.000166223	651	0.000130352
631.2	0.000193034	651.2	0.00012851
631.4	0.000233249	651.4	0.00012494
631.6	0.00020912	651.6	0.000123788
631.8	0.000230568	651.8	0.000119413
632	0.000168904	652	0.000118261
632.2	0.000160861	652.2	0.000118376
632.4	0.000184991	652.4	0.000124019
632.6	0.00015818	652.6	0.000122291
632.8	0.000179629	652.8	0.000127819
633	0.000142094	653	0.000127243
633.2	0.00013137	653.2	0.000119067
633.4	0.000160861	653.4	0.00011734
633.6	0.000198396	653.6	0.000117225
633.8	0.000179629	653.8	0.000109625
634	0.000112603	654	0.000111237
634.2	0.000184991	654.2	0.000109855
634.4	0.000123327	654.4	0.0001064
634.6	0.00013137	654.6	0.000106976
634.8	8.31117e-05	654.8	0.000106861
635	9.91978e-05	655	0.000107437
635.2	9.11548e-05	655.2	0.000110546
635.4	0.00013137	655.4	0.000108358
635.6	9.91978e-05	655.6	0.000107206
635.8	0.000193034	655.8	0.000104788
636	0.00018231	656	0.000107322
636.2	0.000117965	656.2	0.000103176
636.4	0.000101879	656.4	9.64974e-05
636.6	8.31117e-05	656.6	9.48852e-05
636.8	3.48533e-05	656.8	9.53458e-05
637	4.28964e-05	657	9.33883e-05
637.2	0.000142094	657.2	9.82246e-05
637.4	0.000107241	657.4	0.000100988
637.6	0.000155499	657.6	0.000102255
637.8	0.000152818	657.8	9.85701e-05
638	0.000109922	658	0.000102255
638.2	6.43445e-05	658.2	9.85701e-05
638.4	7.50686e-05	658.4	9.7764e-05
638.6	3.48533e-05	658.6	9.46549e-05
638.8	4.02153e-05	658.8	9.2467e-05
639	0.00010456	659	8.61337e-05
639.2	9.38358e-05	659.2	8.36003e-05
639.4	8.31117e-05	659.4	8.18731e-05
639.6	5.89825e-05	659.6	8.14124e-05
639.8	3.48533e-05	659.8	7.71518e-05
640	6.16635e-05	660	7.30064e-05
640.2	0.000163542	660.2	7.38124e-05
640.4	0.000126008	660.4	7.87639e-05
640.6	0.000115284	660.6	8.15276e-05
640.8	0.000139413	660.8	8.75155e-05
641	0.000101879	661	8.2564e-05
641.2	6.70256e-05	661.2	8.16427e-05
641.4	3.48533e-05	661.4	8.26791e-05
641.6	6.70256e-05	661.6	7.99155e-05
641.8	4.55774e-05	661.8	7.87639e-05
642	3.21723e-05	662	7.54245e-05
642.2	0.00010456	662.2	8.07215e-05
642.4	7.50686e-05	662.4	7.83033e-05
642.6	4.28964e-05	662.6	7.41579e-05
642.8	7.50686e-05	662.8	7.41579e-05
643	0.000107241	663	7.32367e-05
643.2	7.23876e-05	663.2	7.60003e-05
643.4	1.87672e-05	663.4	6.98972e-05
643.6	2.68102e-05	663.6	6.94366e-05
643.8	3.21723e-05	663.8	7.17397e-05
644	5.09394e-05	664	6.84003e-05
644.2	6.16635e-05	664.2	6.73639e-05
644.4	9.38358e-05	664.4	6.48306e-05
644.6	5.89825e-05	664.6	6.39093e-05
644.8	3.21723e-05	664.8	6.78245e-05
645	4.55774e-05	665	6.87457e-05
645.2	5.89825e-05	665.2	7.09336e-05
645.4	4.55774e-05	665.4	6.85154e-05
645.6	5.63015e-05	665.6	6.65578e-05
645.8	0.000120646	665.8	6.92063e-05
646	0.000126008	666	7.33518e-05
646.2	6.16635e-05	666.2	7.00124e-05
646.4	4.28964e-05	666.4	6.62124e-05
646.6	0.000160861	666.6	6.40245e-05
646.8	0.000139413	666.8	6.46003e-05
647	0.000190353	667	6.55215e-05
647.2	0.000134051	667.2	6.57518e-05
647.4	0.000147456	667.4	6.50609e-05
647.6	0.000134051	667.6	6.58669e-05
647.8	0.00010456	667.8	6.27578e-05
648	0.00010456	668	6.22972e-05
648.2	0.000115284	668.2	5.71154e-05
648.4	0.000101879	668.4	5.80366e-05
648.6	0.000150137	668.6	5.67699e-05
648.8	0.000120646	668.8	5.67699e-05
649	8.84737e-05	669	5.57336e-05
649.2	7.77497e-05	669.2	5.56184e-05
649.4	8.04307e-05	669.4	5.71154e-05
649.6	0.000101879	669.6	5.82669e-05
649.8	6.43445e-05	669.8	5.68851e-05
650	6.43445e-05	670	5.76911e-05
650.2	7.50686e-05	670.2	5.73457e-05
650.4	4.82584e-05	670.4	5.36608e-05
650.6	3.21723e-05	670.6	5.18184e-05
650.8	0.000144775	670.8	5.6079e-05
651	0.000134051	671	5.86124e-05
651.2	0.00013137	671.2	5.79214e-05
651.4	0.000109922	671.4	5.41214e-05
651.6	4.55774e-05	671.6	5.03214e-05
651.8	0.000128689	671.8	5.17032e-05
652	0.000101879	672	4.87093e-05
652.2	7.23876e-05	672.2	5.13578e-05
652.4	8.04307e-05	672.4	5.6079e-05
652.6	0.00010456	672.6	5.67699e-05
652.8	6.97066e-05	672.8	5.65396e-05
653	5.89825e-05	673	5.23941e-05
653.2	4.55774e-05	673.2	5.36608e-05
653.4	4.28964e-05	673.4	4.8479e-05
653.6	2.14482e-05	673.6	4.47941e-05
653.8	0.000101879	673.8	4.38729e-05
654	8.84737e-05	674	4.0879e-05
654.2	8.04307e-05	674.2	4.15699e-05
654.4	0.000115284	674.4	4.61759e-05
654.6	7.50686e-05	674.6	5.02063e-05
654.8	5.36205e-05	674.8	4.8479e-05
655	4.28964e-05	675	4.94002e-05
655.2	8.04307e-05	675.2	4.85941e-05
655.4	0.000120646	675.4	5.10123e-05
655.6	0.000134051	675.6	4.82487e-05
655.8	0.00013137	675.8	4.53699e-05
656	0.000128689	676	4.6982e-05
656.2	0.000160861	676.2	4.85941e-05
656.4	0.000136732	676.4	4.97457e-05
656.6	0.000134051	676.6	4.51396e-05
656.8	6.43445e-05	676.8	4.45638e-05
657	3.75343e-05	677	4.28365e-05
657.2	8.84737e-05	677.2	4.68669e-05
657.4	6.43445e-05	677.4	4.79032e-05
657.6	9.65168e-05	677.6	4.47941e-05
657.8	0.000139413	677.8	4.38729e-05
658	0.000134051	678	4.4679e-05
658.2	0.00013137	678.2	4.39881e-05
658.4	0.000150137	678.4	4.67517e-05
658.6	0.000171585	678.6	4.61759e-05
658.8	9.38358e-05	678.8	4.65214e-05
659	7.23876e-05	679	4.77881e-05
659.2	0.000109922	679.2	5.02063e-05
659.4	9.91978e-05	679.4	4.6982e-05
659.6	8.57927e-05	679.6	4.5485e-05
659.8	9.38358e-05	679.8	4.51396e-05
660	0.000174266	680	4.22608e-05
660.2	0.000152818	680.2	4.11093e-05
660.4	0.000147456	680.4	4.00729e-05
660.6	0.000155499	680.6	3.66183e-05
660.8	0.000168904	680.8	3.88062e-05
661	0.000107241	681	4.05335e-05
661.2	0.000123327	681.2	3.85759e-05
661.4	0.000120646	681.4	3.59274e-05
661.6	9.91978e-05	681.6	3.29335e-05
661.8	0.000120646	681.8	3.89214e-05
662	0.000115284	682	3.99577e-05
662.2	0.000155499	682.2	3.88062e-05
662.4	0.000144775	682.4	3.98426e-05
662.6	0.000147456	682.6	3.4891e-05
662.8	9.38358e-05	682.8	3.38547e-05
663	0.00013137	683	3.18971e-05
663.2	9.65168e-05	683.2	2.91334e-05
663.4	9.91978e-05	683.4	2.92486e-05
663.6	0.000126008	683.6	3.28183e-05
663.8	7.50686e-05	683.8	3.4891e-05
664	8.31117e-05	684	3.06304e-05
664.2	4.55774e-05	684.2	3.21274e-05
664.4	5.89825e-05	684.4	2.94789e-05
664.6	0.000107241	684.6	3.00547e-05
664.8	0.00010456	684.8	3.45456e-05
665	0.00010456	685	3.14365e-05
665.2	0.00010456	685.2	3.00547e-05
665.4	0.000152818	685.4	3.0285e-05
665.6	0.000128689	685.6	2.90183e-05
665.8	6.97066e-05	685.8	2.70607e-05
666	0.000115284	686	2.74062e-05
666.2	9.11548e-05	686.2	3.20122e-05
666.4	6.43445e-05	686.4	3.18971e-05
666.6	5.09394e-05	686.6	3.12062e-05
666.8	3.75343e-05	686.8	2.90183e-05
667	2.68102e-05	687	2.70607e-05
667.2	2.68102e-05	687.2	3.24729e-05
667.4	2.14482e-05	687.4	2.59092e-05
667.6	0	687.6	2.82122e-05
667.8	1.34051e-05	687.8	2.98244e-05
668	5.63015e-05	688	2.7291e-05
668.2	1.07241e-05	688.2	3.08607e-05
668.4	4.82584e-05	688.4	2.74062e-05
668.6	0.000126008	688.6	2.86728e-05
668.8	0.000222525	688.8	2.77516e-05
669	0.00015818	689	2.75213e-05
669.2	0.000136732	689.2	2.86728e-05
669.4	0.000139413	689.4	2.68304e-05
669.6	6.16635e-05	689.6	3.06304e-05
669.8	0.000117965	689.8	2.99395e-05
670	0.00010456	690	2.80971e-05
670.2	8.04307e-05	690.2	2.54486e-05
670.4	0.00010456	690.4	2.71759e-05
670.6	6.16635e-05	690.6	2.67153e-05
670.8	3.75343e-05	690.8	2.47577e-05
671	0.000115284	691	2.6485e-05
671.2	0.000152818	691.2	2.85577e-05
671.4	0.000109922	691.4	2.91334e-05
671.6	0.000136732	691.6	3.08607e-05
671.8	9.11548e-05	691.8	2.82122e-05
672	8.04307e-05	692	2.76365e-05
672.2	4.55774e-05	692.2	2.80971e-05
672.4	8.57927e-05	692.4	2.78668e-05
672.6	0.000152818	692.6	2.85577e-05
672.8	0.000109922	692.8	3.13213e-05
673	0.000112603	693	2.95941e-05
673.2	0.000107241	693.2	2.80971e-05
673.4	7.23876e-05	693.4	2.41819e-05
673.6	0.000139413	693.6	2.26849e-05
673.8	0.000128689	693.8	2.10728e-05
674	0.000152818	694	2.69456e-05
674.2	0.000257378	694.2	2.61395e-05
674.4	0.00023593	694.4	2.97092e-05
674.6	0.000206439	694.6	3.15516e-05
674.8	0.000227887	694.8	3.37395e-05
675	0.000139413	695	3.04001e-05
675.2	0.000166223	695.2	3.04001e-05
675.4	0.000109922	695.4	2.91334e-05
675.6	0.00010456	695.6	2.86728e-05
675.8	0.000139413	695.8	2.83274e-05
676	0.000201077	696	2.85577e-05
676.2	0.000190353	696.2	2.22243e-05
676.4	0.000184991	696.4	2.56789e-05
676.6	0.000152818	696.6	2.54486e-05
676.8	0.000249335	696.8	2.48728e-05
677	0.000217163	697	2.22243e-05
677.2	0.000230568	697.2	2.22243e-05
677.4	0.000219844	697.4	2.77516e-05
677.6	0.000195715	697.6	2.78668e-05
677.8	0.000136732	697.8	2.31455e-05
678	9.38358e-05	698	2.41819e-05
678.2	9.38358e-05	698.2	1.92304e-05
678.4	0.000115284	698.4	2.36062e-05
678.6	0.000142094	698.6	2.48728e-05
678.8	0.000243973	698.8	2.25698e-05
679	0.000219844	699	1.99213e-05
679.2	0.000193034	699.2	1.8194e-05
679.4	0.000176947	699.4	1.8194e-05
679.6	0.000174266	699.6	2.1188e-05
679.8	0.00015818	699.8	2.26849e-05
680	0.000174266	700	2.17637e-05
		700.2	2.18789e-05
		700.4	2.16486e-05
		700.6	2.1994e-05
		700.8	2.42971e-05
		701	2.21092e-05
		701.2	1.9691e-05
		701.4	2.04971e-05
		701.6	1.25516e-05
		701.8	1.64667e-05
		702	1.38182e-05
		702.2	1.94607e-05
		702.4	1.56607e-05
		702.6	1.26667e-05
		702.8	1.45091e-05
		703	1.57758e-05
		703.2	1.70425e-05
		703.4	1.75031e-05
		703.6	1.93455e-05
		703.8	1.64667e-05
		704	1.52001e-05
		704.2	1.75031e-05
		704.4	1.65819e-05
		704.6	1.53152e-05
		704.8	1.76183e-05
		705	1.56607e-05
		705.2	1.25516e-05
		705.4	1.62364e-05
		705.6	1.71576e-05
		705.8	1.60061e-05
		706	1.64667e-05
		706.2	1.62364e-05
		706.4	1.64667e-05
		706.6	1.37031e-05
		706.8	1.50849e-05
		707	1.46243e-05
		707.2	2.14183e-05
		707.4	2.02667e-05
		707.6	2.04971e-05
		707.8	1.91152e-05
		708	1.71576e-05
		708.2	1.62364e-05
		708.4	1.73879e-05
		708.6	1.54304e-05
		708.8	1.23213e-05
		709	1.26667e-05
		709.2	1.49698e-05
		709.4	1.39334e-05
		709.6	1.30122e-05
		709.8	1.31273e-05
		710	1.35879e-05
		710.2	1.2897e-05
		710.4	1.02485e-05
		710.6	1.47395e-05
		710.8	1.86546e-05
		711	1.93455e-05
		711.2	1.77334e-05
		711.4	1.63516e-05
		711.6	1.8194e-05
		711.8	1.94607e-05
		712	1.76183e-05
		712.2	1.40485e-05
		712.4	1.63516e-05
		712.6	1.25516e-05
		712.8	1.25516e-05
		713	8.75155e-06
		713.2	1.15152e-05
		713.4	9.55761e-06
		713.6	1.0594e-05
		713.8	1.02485e-05
		714	9.21216e-06
		714.2	1.04788e-05
		714.4	1.03637e-05
		714.6	6.33336e-06
		714.8	9.67277e-06
		715	8.40609e-06
		715.2	7.36973e-06
		715.4	1.01334e-05
		715.6	1.03637e-05
		715.8	1.26667e-05
		716	1.24364e-05
		716.2	1.0594e-05
		716.4	1.03637e-05
		716.6	1.02485e-05
		716.8	9.67277e-06
		717	9.55761e-06
		717.2	9.67277e-06
		717.4	8.17579e-06
		717.6	9.78792e-06
		717.8	7.25457e-06
		718	9.32731e-06
		718.2	6.90912e-06
		718.4	5.18184e-06
		718.6	9.55761e-06
		718.8	1.00182e-05
		719	1.2091e-05
		719.2	1.22061e-05
		719.4	1.03637e-05
		719.6	7.60003e-06
		719.8	8.06064e-06
		720	1.00182e-05
		720.2	9.67277e-06
		720.4	9.67277e-06
		720.6	4.83638e-06
		720.8	1.95758e-06
		721	1.15152e-06
		721.2	2.41819e-06
		721.4	0
		721.6	4.03032e-06
		721.8	4.83638e-06
		722	7.36973e-06
		722.2	9.09701e-06
		722.4	1.10546e-05
		722.6	7.94549e-06
		722.8	6.44851e-06
		723	7.83033e-06
		723.2	8.6364e-06
		723.4	9.78792e-06
		723.6	6.56366e-06
		723.8	9.44246e-06
		724	8.29094e-06
		724.2	8.6364e-06
		724.4	1.18607e-05
		724.6	1.0594e-05
		724.8	7.71518e-06
		725	5.9879e-06
		725.2	3.45456e-06
		725.4	3.33941e-06
		725.6	5.52729e-06
		725.8	6.33336e-06
		726	7.94549e-06
		726.2	8.06064e-06
		726.4	6.56366e-06
		726.6	4.72123e-06
		726.8	5.06669e-06
		727	6.90912e-06
		727.2	5.7576e-06
		727.4	8.6364e-06
		727.6	5.9879e-06
		727.8	7.25457e-06
		728	9.32731e-06
		728.2	6.33336e-06
		728.4	4.49093e-06
		728.6	2.41819e-06
		728.8	4.72123e-06
		729	7.13942e-06
		729.2	6.90912e-06
		729.4	6.10305e-06
		729.6	2.8788e-06
		729.8	1.38182e-06
		730	2.07274e-06
			--
			--
			--
			--
			--
			--
			--
			--
			--
			--
			--
			--
			--
			--
			--
			--
			--
			--
			--
			--
			--
			--
			--
			--
			--
			--
			--
			--
			--
			--
			--
			--
			--
			--
			--
			--
			--
			--
			--
			--
			--
			--
			--
			--
			--
			--
			--
			--
			--
			--
			--
			--
			--
			--
			--
			--
			--
			--
			--
			--
			--
			--
			--
			--
			--
			--
			--
			--
			--
			--
			--
			--
			--
			--
			--
			--
			--
			--
			--
			--
			--
			--
			--
			--
			--
			--
			--
			--
			--
			--
			--
			--
			--
			--
			--
			--
			--
			--
			--
			--
			--
			--
			--
			--
			--
			--
			--
			--
			--
			--
			--
			--
			--
			--
			--
			--
			--
			--
			--
			--
			--
			--
			--
			--
			--
			--
			--
			--
			--
			--
			--
			--
			--
			--
			--
			--
			--
			--
			--
			--
			--
			--
			--
			--
			--
			--
			--
			--
			--
			--
			--
			--
			--
			--
			--
			--
			--
			--
			--
			--
			--
			--
			--
			--
			--
			--
			--
			--
			--
			--
			--
			--
			--
			--
			--
			--
			--
			--
			--
			--
			--
			--
			--
			--
			--
			--
			--
			--
			--
			--
			--
			--
			--
			--
			--
			--
			--
			--
			--
			--
			--
			--
			--
			--
			--
			--
			--
			--
			--
			--
			--
			--
			--
			--
			--
			--
			--
			--
			--
			--
			--
			--
			--
			--
			--
			--
			--
			--
			--
			--
			--
			--
			--
			--
			--
			--
			--
			--
			--
			--
			--
			--
			--
			--
			--
			--
			--
			--
			--
			--
			--
			--
			--
			--
			--
			--
			--
			--
			--
			--
			--
			--
			--
			--
			--
			--
			--
			--
			--
			--
			--
			--
			--
			--
			--
			--
			--
			--
			--
			--
			--
			--
			--
			--
			--
			--
			--
			--
			--
			--
			--
			--
			--
			--
			--
			--
			--
[truncated: 3 more rows]

## Sheet: Fig. 3c
Photoluminescence (PL) spectra of PtQS1
at 77K		at room temperature
	--	380	0.00693
370.6	0.00306	380.2	0.00692
370.8	0.00306	380.4	0.00695
371	0.00303	380.6	0.00698
371.2	0.00303	380.8	0.00703
371.4	0.00298	381	0.00707
371.6	0.00298	381.2	0.00716
371.8	0.00296	381.4	0.00721
372	0.00293	381.6	0.00731
372.2	0.0029	381.8	0.00736
372.4	0.00288	382	0.00743
372.6	0.0029	382.2	0.00748
372.8	0.0029	382.4	0.00754
373	0.0029	382.6	0.00765
373.2	0.0029	382.8	0.00772
373.4	0.0029	383	0.00783
373.6	0.0029	383.2	0.00794
373.8	0.0029	383.4	0.00799
374	0.00289	383.6	0.00803
374.2	0.00283	383.8	0.00808
374.4	0.00283	384	0.00814
374.6	0.00282	384.2	0.0082
374.8	0.00282	384.4	0.00827
375	0.00277	384.6	0.00836
375.2	0.00274	384.8	0.00848
375.4	0.00274	385	0.00856
375.6	0.0027	385.2	0.00862
375.8	0.0027	385.4	0.00868
376	0.0027	385.6	0.00875
376.2	0.00271	385.8	0.00878
376.4	0.00272	386	0.00886
376.6	0.00272	386.2	0.00892
376.8	0.00271	386.4	0.00899
377	0.00271	386.6	0.00902
377.2	0.00271	386.8	0.0091
377.4	0.00265	387	0.00915
377.6	0.00263	387.2	0.00918
377.8	0.00263	387.4	0.00923
378	0.00262	387.6	0.00928
378.2	0.00262	387.8	0.00931
378.4	0.00262	388	0.00935
378.6	0.00261	388.2	0.00942
378.8	0.00261	388.4	0.00943
379	0.00261	388.6	0.00948
379.2	0.00258	388.8	0.00948
379.4	0.00253	389	0.0095
379.6	0.00253	389.2	0.00953
379.8	0.00253	389.4	0.00956
380	0.00253	389.6	0.00959
380.2	0.00253	389.8	0.0096
380.4	0.00253	390	0.00963
380.6	0.00253	390.2	0.00963
380.8	0.00253	390.4	0.00965
381	0.00252	390.6	0.00963
381.2	0.00251	390.8	0.00964
381.4	0.00251	391	0.00965
381.6	0.0025	391.2	0.00965
381.8	0.0025	391.4	0.00964
382	0.00244	391.6	0.00962
382.2	0.00244	391.8	0.00963
382.4	0.00244	392	0.00964
382.6	0.00248	392.2	0.00961
382.8	0.00248	392.4	0.00961
383	0.0025	392.6	0.00957
383.2	0.00252	392.8	0.00958
383.4	0.00254	393	0.00955
383.6	0.00254	393.2	0.00952
383.8	0.00254	393.4	0.00954
384	0.00254	393.6	0.00949
384.2	0.0025	393.8	0.00947
384.4	0.00248	394	0.00943
384.6	0.00248	394.2	0.00942
384.8	0.00241	394.4	0.00937
385	0.00241	394.6	0.00936
385.2	0.00241	394.8	0.0093
385.4	0.00237	395	0.00929
385.6	0.00234	395.2	0.00926
385.8	0.00234	395.4	0.00925
386	0.00234	395.6	0.00924
386.2	0.00234	395.8	0.00922
386.4	0.00234	396	0.0092
386.6	0.00234	396.2	0.00913
386.8	0.00234	396.4	0.00908
387	0.00234	396.6	0.00904
387.2	0.00235	396.8	0.00898
387.4	0.00236	397	0.00897
387.6	0.00236	397.2	0.00895
387.8	0.00236	397.4	0.0089
388	0.00236	397.6	0.00887
388.2	0.00236	397.8	0.00881
388.4	0.00236	398	0.00873
388.6	0.00235	398.2	0.00871
388.8	0.00234	398.4	0.00866
389	0.0023	398.6	0.00859
389.2	0.0023	398.8	0.00859
389.4	0.0023	399	0.00854
389.6	0.0023	399.2	0.00853
389.8	0.0023	399.4	0.00851
390	0.0023	399.6	0.0085
390.2	0.00232	399.8	0.00848
390.4	0.00235	400	0.00842
390.6	0.00237	400.2	0.00839
390.8	0.00235	400.4	0.00834
391	0.00235	400.6	0.0083
391.2	0.00236	400.8	0.00826
391.4	0.00236	401	0.00824
391.6	0.00236	401.2	0.00821
391.8	0.00237	401.4	0.00817
392	0.00237	401.6	0.00813
392.2	0.00249	401.8	0.00813
392.4	0.0025	402	0.00806
392.6	0.0025	402.2	0.00804
392.8	0.0025	402.4	0.00799
393	0.00249	402.6	0.00796
393.2	0.00238	402.8	0.00793
393.4	0.00233	403	0.00791
393.6	0.00233	403.2	0.00786
393.8	0.00233	403.4	0.00783
394	0.00231	403.6	0.00781
394.2	0.00229	403.8	0.00777
394.4	0.00231	404	0.00772
394.6	0.00231	404.2	0.00767
394.8	0.00234	404.4	0.00761
395	0.00234	404.6	0.00757
395.2	0.00234	404.8	0.00751
395.4	0.00235	405	0.0075
395.6	0.00241	405.2	0.00746
395.8	0.00244	405.4	0.00741
396	0.00244	405.6	0.00738
396.2	0.00246	405.8	0.00732
396.4	0.00246	406	0.00728
396.6	0.00247	406.2	0.00721
396.8	0.00247	406.4	0.00715
397	0.00247	406.6	0.00707
397.2	0.00247	406.8	0.00704
397.4	0.00248	407	0.00702
397.6	0.00246	407.2	0.00697
397.8	0.00246	407.4	0.00694
398	0.00244	407.6	0.00689
398.2	0.00242	407.8	0.00684
398.4	0.00242	408	0.00679
398.6	0.00242	408.2	0.00675
398.8	0.00242	408.4	0.00671
399	0.00247	408.6	0.00666
399.2	0.00253	408.8	0.00659
399.4	0.0026	409	0.00655
399.6	0.0026	409.2	0.00652
399.8	0.0026	409.4	0.00648
400	0.00254	409.6	0.00644
400.2	0.00254	409.8	0.0064
400.4	0.00254	410	0.00637
400.6	0.00257	410.2	0.00632
400.8	0.00257	410.4	0.00627
401	0.00261	410.6	0.00623
401.2	0.00262	410.8	0.00616
401.4	0.00265	411	0.00617
401.6	0.00268	411.2	0.00612
401.8	0.00274	411.4	0.00608
402	0.00277	411.6	0.00604
402.2	0.00279	411.8	0.00602
402.4	0.0028	412	0.00599
402.6	0.00281	412.2	0.00596
402.8	0.00285	412.4	0.00591
403	0.00286	412.6	0.00586
403.2	0.00286	412.8	0.00583
403.4	0.0029	413	0.0058
403.6	0.00293	413.2	0.0058
403.8	0.00293	413.4	0.0058
404	0.00302	413.6	0.00575
404.2	0.00317	413.8	0.00575
404.4	0.00317	414	0.00572
404.6	0.00317	414.2	0.00572
404.8	0.00317	414.4	0.0057
405	0.00318	414.6	0.00571
405.2	0.00324	414.8	0.0057
405.4	0.00321	415	0.00572
405.6	0.00316	415.2	0.00573
405.8	0.00321	415.4	0.00574
406	0.00321	415.6	0.00573
406.2	0.00322	415.8	0.00576
406.4	0.00322	416	0.00577
406.6	0.00322	416.2	0.00574
406.8	0.00322	416.4	0.00576
407	0.00322	416.6	0.00577
407.2	0.00319	416.8	0.00581
407.4	0.00319	417	0.00581
407.6	0.00319	417.2	0.00584
407.8	0.00317	417.4	0.00586
408	0.00317	417.6	0.00588
408.2	0.00317	417.8	0.00592
408.4	0.00317	418	0.006
408.6	0.00318	418.2	0.00603
408.8	0.00318	418.4	0.00608
409	0.00324	418.6	0.00613
409.2	0.00324	418.8	0.00618
409.4	0.00329	419	0.00625
409.6	0.00326	419.2	0.00633
409.8	0.00326	419.4	0.0064
410	0.00326	419.6	0.00645
410.2	0.00326	419.8	0.00654
410.4	0.00321	420	0.00665
410.6	0.00315	420.2	0.0067
410.8	0.00311	420.4	0.0068
411	0.00305	420.6	0.00683
411.2	0.00305	420.8	0.00692
411.4	0.00301	421	0.00697
411.6	0.00299	421.2	0.00712
411.8	0.00299	421.4	0.00721
412	0.00288	421.6	0.0073
412.2	0.00284	421.8	0.00739
412.4	0.00284	422	0.0075
412.6	0.00284	422.2	0.00756
412.8	0.00284	422.4	0.00772
413	0.00279	422.6	0.0078
413.2	0.00279	422.8	0.00794
413.4	0.00279	423	0.00803
413.6	0.00279	423.2	0.00816
413.8	0.00279	423.4	0.00829
414	0.00272	423.6	0.00842
414.2	0.00272	423.8	0.00851
414.4	0.00269	424	0.00864
414.6	0.00266	424.2	0.00871
414.8	0.00262	424.4	0.0089
415	0.00262	424.6	0.00905
415.2	0.00262	424.8	0.00918
415.4	0.00259	425	0.00929
415.6	0.00255	425.2	0.00939
415.8	0.00252	425.4	0.0095
416	0.00244	425.6	0.00964
416.2	0.00243	425.8	0.00978
416.4	0.00238	426	0.00992
416.6	0.00238	426.2	0.01005
416.8	0.00238	426.4	0.01024
417	0.00238	426.6	0.01037
417.2	0.00238	426.8	0.01051
417.4	0.00238	427	0.01061
417.6	0.00239	427.2	0.01075
417.8	0.0024	427.4	0.01089
418	0.0025	427.6	0.01107
418.2	0.00255	427.8	0.01118
418.4	0.00256	428	0.01134
418.6	0.00258	428.2	0.01146
418.8	0.00265	428.4	0.01162
419	0.00279	428.6	0.01172
419.2	0.00283	428.8	0.01188
419.4	0.00286	429	0.01199
419.6	0.00292	429.2	0.01217
419.8	0.00295	429.4	0.01234
420	0.00296	429.6	0.01248
420.2	0.00297	429.8	0.0126
420.4	0.00303	430	0.01275
420.6	0.00304	430.2	0.01284
420.8	0.00309	430.4	0.01298
421	0.00329	430.6	0.01311
421.2	0.00334	430.8	0.01327
421.4	0.00357	431	0.01339
421.6	0.00368	431.2	0.01352
421.8	0.00369	431.4	0.01368
422	0.00382	431.6	0.0139
422.2	0.00383	431.8	0.01402
422.4	0.0041	432	0.01418
422.6	0.00424	432.2	0.01432
422.8	0.00454	432.4	0.01454
423	0.0047	432.6	0.01465
423.2	0.00475	432.8	0.01489
423.4	0.00478	433	0.01506
423.6	0.00501	433.2	0.01525
423.8	0.00503	433.4	0.01541
424	0.00505	433.6	0.01562
424.2	0.00508	433.8	0.01583
424.4	0.00535	434	0.01609
424.6	0.00535	434.2	0.01633
424.8	0.00559	434.4	0.01658
425	0.00569	434.6	0.01672
425.2	0.00573	434.8	0.01705
425.4	0.00577	435	0.01728
425.6	0.00591	435.2	0.0176
425.8	0.00595	435.4	0.01787
426	0.00612	435.6	0.01827
426.2	0.00625	435.8	0.01858
426.4	0.00643	436	0.01894
426.6	0.00643	436.2	0.01927
426.8	0.00647	436.4	0.01976
427	0.00653	436.6	0.02012
427.2	0.00656	436.8	0.0206
427.4	0.00674	437	0.02099
427.6	0.00691	437.2	0.02156
427.8	0.00697	437.4	0.02202
428	0.00697	437.6	0.02269
428.2	0.00697	437.8	0.02323
428.4	0.00703	438	0.02397
428.6	0.00705	438.2	0.02449
428.8	0.00705	438.4	0.02523
429	0.00706	438.6	0.0259
429.2	0.00706	438.8	0.02678
429.4	0.00713	439	0.02753
429.6	0.00714	439.2	0.02844
429.8	0.00718	439.4	0.02915
430	0.00728	439.6	0.03014
430.2	0.00741	439.8	0.031
430.4	0.00745	440	0.03215
430.6	0.00747	440.2	0.03304
430.8	0.00755	440.4	0.03438
431	0.00755	440.6	0.03549
431.2	0.00759	440.8	0.0369
431.4	0.0076	441	0.03793
431.6	0.0076	441.2	0.0394
431.8	0.0076	441.4	0.04067
432	0.00759	441.6	0.04221
432.2	0.00758	441.8	0.04358
432.4	0.00756	442	0.04561
432.6	0.00755	442.2	0.04728
432.8	0.00755	442.4	0.04931
433	0.00755	442.6	0.051
433.2	0.00755	442.8	0.05309
433.4	0.00755	443	0.0548
433.6	0.00755	443.2	0.05716
433.8	0.00755	443.4	0.05904
434	0.00752	443.6	0.06185
434.2	0.00752	443.8	0.06395
434.4	0.00752	444	0.06671
434.6	0.00753	444.2	0.06887
434.8	0.00753	444.4	0.07181
435	0.00754	444.6	0.07408
435.2	0.00755	444.8	0.0773
435.4	0.00755	445	0.08015
435.6	0.00754	445.2	0.08406
435.8	0.00754	445.4	0.08708
436	0.00752	445.6	0.09118
436.2	0.00744	445.8	0.09435
436.4	0.00744	446	0.09886
436.6	0.00744	446.2	0.10218
436.8	0.00744	446.4	0.1069
437	0.00762	446.6	0.11117
437.2	0.00763	446.8	0.1172
437.4	0.0077	447	0.12213
437.6	0.0077	447.2	0.12886
437.8	0.0077	447.4	0.13379
438	0.00772	447.6	0.1404
438.2	0.00774	447.8	0.14567
438.4	0.00775	448	0.15374
438.6	0.00778	448.2	0.16013
438.8	0.00791	448.4	0.16977
439	0.00794	448.6	0.17751
439.2	0.00808	448.8	0.1876
439.4	0.00815	449	0.19489
439.6	0.00815	449.2	0.20475
439.8	0.00815	449.4	0.21293
440	0.00815	449.6	0.2247
440.2	0.00813	449.8	0.23401
440.4	0.00813	450	0.24724
440.6	0.00813	450.2	0.25822
440.8	0.00813	450.4	0.27246
441	0.00833	450.6	0.28345
441.2	0.00863	450.8	0.29768
441.4	0.00881	451	0.30923
441.6	0.00918	451.2	0.32526
441.8	0.00942	451.4	0.33838
442	0.0101	451.6	0.35721
442.2	0.01058	451.8	0.3729
442.4	0.01124	452	0.39218
442.6	0.01157	452.2	0.40676
442.8	0.01244	452.4	0.42626
443	0.01293	452.6	0.44106
443.2	0.01443	452.8	0.46214
443.4	0.01537	453	0.47895
443.6	0.01691	453.2	0.50238
443.8	0.01799	453.4	0.52099
444	0.01966	453.6	0.54307
444.2	0.02075	453.8	0.56034
444.4	0.02313	454	0.58152
444.6	0.02492	454.2	0.59812
444.8	0.02783	454.4	0.61941
445	0.0301	454.6	0.63713
445.2	0.0335	454.8	0.66145
445.4	0.03676	455	0.67973
445.6	0.04132	455.2	0.70147
445.8	0.04466	455.4	0.71862
446	0.05029	455.6	0.73981
446.2	0.05471	455.8	0.75472
446.4	0.06147	456	0.77512
446.6	0.06779	456.2	0.7916
446.8	0.07719	456.4	0.81223
447	0.08538	456.6	0.82804
447.2	0.09675	456.8	0.84743
447.4	0.10555	457	0.862
447.6	0.11973	457.2	0.87826
447.8	0.13045	457.4	0.88992
448	0.14666	457.6	0.90561
448.2	0.15815	457.8	0.91873
448.4	0.18096	458	0.93251
448.6	0.19975	458.2	0.94227
448.8	0.22163	458.4	0.95381
449	0.23806	458.6	0.96278
449.2	0.26186	458.8	0.97085
449.4	0.28099	459	0.97702
449.6	0.30748	459.2	0.98408
449.8	0.32891	459.4	0.98924
450	0.36414	459.6	0.99283
450.2	0.39152	459.8	0.99574
450.4	0.42548	460	0.99888
450.6	0.45082	460.2	0.99989
450.8	0.48682	460.4	0.99944
451	0.51403	460.6	1
451.2	0.54838	460.8	0.99821
451.4	0.57844	461	0.9963
451.6	0.61966	461.2	0.9917
451.8	0.65264	461.4	0.98901
452	0.68946	461.6	0.98318
452.2	0.71804	461.8	0.9778
452.4	0.75597	462	0.96984
452.6	0.7785	462.2	0.96413
452.8	0.81148	462.4	0.9546
453	0.83731	462.6	0.94642
453.2	0.86974	462.8	0.93554
453.4	0.89172	463	0.92691
453.6	0.91316	463.2	0.91323
453.8	0.9324	463.4	0.90348
454	0.95438	463.6	0.89182
454.2	0.96592	463.8	0.88285
454.4	0.97802	464	0.86974
454.6	0.99231	464.2	0.85886
454.8	0.99945	464.4	0.84485
455	1	464.6	0.83241
455.2	1	464.8	0.81739
455.4	1	465	0.80674
455.6	0.99945	465.2	0.79295
455.8	0.99285	465.4	0.78207
456	0.98131	465.6	0.76694
456.2	0.97747	465.8	0.7545
456.4	0.96318	466	0.73948
456.6	0.94504	466.2	0.72681
456.8	0.9236	466.4	0.71167
457	0.91096	466.6	0.70114
457.2	0.88678	466.8	0.68735
457.4	0.86589	467	0.67625
457.6	0.83621	467.2	0.66235
457.8	0.81588	467.4	0.65181
458	0.78565	467.6	0.63758
458.2	0.76201	467.8	0.6258
458.4	0.73069	468	0.61258
458.6	0.7065	468.2	0.60294
458.8	0.67847	468.4	0.59094
459	0.65649	468.6	0.58164
459.2	0.63011	468.8	0.57076
459.4	0.61087	469	0.56191
459.6	0.58229	469.2	0.55025
459.8	0.5592	469.4	0.54061
460	0.53618	469.6	0.52985
460.2	0.5193	469.8	0.52166
460.4	0.49589	470	0.51146
460.6	0.47687	470.2	0.50417
460.8	0.45665	470.4	0.49498
461	0.44032	470.6	0.48747
461.2	0.42048	470.8	0.47761
461.4	0.40394	471	0.47043
461.6	0.38679	471.2	0.46146
461.8	0.37459	471.4	0.4544
462	0.35975	471.6	0.44577
462.2	0.34777	471.8	0.43949
462.4	0.33738	472	0.43164
462.6	0.32765	472.2	0.42525
462.8	0.31534	472.4	0.41786
463	0.30572	472.6	0.41214
463.2	0.29737	472.8	0.40474
463.4	0.29077	473	0.39891
463.6	0.28203	473.2	0.39263
463.8	0.27582	473.4	0.38804
464	0.26906	473.6	0.38187
464.2	0.2645	473.8	0.37705
464.4	0.2579	474	0.37145
464.6	0.25367	474.2	0.36685
464.8	0.24944	474.4	0.36136
465	0.24532	474.6	0.35766
465.2	0.24081	474.8	0.35306
465.4	0.23878	475	0.34947
465.6	0.23669	475.2	0.34477
465.8	0.23443	475.4	0.3414
466	0.23081	475.6	0.33714
466.2	0.22949	475.8	0.33378
466.4	0.22701	476	0.32963
466.6	0.22388	476.2	0.32649
466.8	0.22064	476.4	0.32313
467	0.2191	476.6	0.32044
467.2	0.21723	476.8	0.31708
467.4	0.21569	477	0.31439
467.6	0.21173	477.2	0.31125
467.8	0.21108	477.4	0.30878
468	0.20893	477.6	0.30609
468.2	0.20673	477.8	0.30441
468.4	0.20349	478	0.30194
468.6	0.20052	478.2	0.30015
468.8	0.1981	478.4	0.29836
469	0.19585	478.6	0.29667
469.2	0.19354	478.8	0.29466
469.4	0.19145	479	0.29286
469.6	0.19002	479.2	0.2914
469.8	0.18794	479.4	0.29062
470	0.1853	479.6	0.28916
470.2	0.1831	479.8	0.28849
470.4	0.18046	480	0.28771
470.6	0.17865	480.2	0.28703
470.8	0.17513	480.4	0.28591
471	0.17326	480.6	0.28502
471.2	0.1693	480.8	0.28468
471.4	0.16667	481	0.28445
471.6	0.16408	481.2	0.28412
471.8	0.16232	481.4	0.28412
472	0.15925	481.6	0.28434
472.2	0.15595	481.8	0.28412
472.4	0.1538	482	0.28401
472.6	0.15221	482.2	0.28389
472.8	0.15073	482.4	0.28412
473	0.14946	482.6	0.28412
473.2	0.14809	482.8	0.28445
473.4	0.14699	483	0.28468
473.6	0.14638	483.2	0.28535
473.8	0.14578	483.4	0.28569
474	0.14298	483.6	0.28647
474.2	0.14276	483.8	0.28692
474.4	0.14259	484	0.28771
474.6	0.14215	484.2	0.28804
474.8	0.14116	484.4	0.2886
475	0.14116	484.6	0.28894
475.2	0.14116	484.8	0.28961
475.4	0.14149	485	0.28961
475.6	0.14215	485.2	0.29028
475.8	0.14276	485.4	0.29107
476	0.14298	485.6	0.2914
476.2	0.14364	485.8	0.29208
476.4	0.14616	486	0.29264
476.6	0.14814	486.2	0.29275
476.8	0.15051	486.4	0.29342
477	0.15084	486.6	0.2941
477.2	0.15419	486.8	0.29454
477.4	0.15606	487	0.29466
477.6	0.15974	487.2	0.29466
477.8	0.16216	487.4	0.29499
478	0.16557	487.6	0.2951
478.2	0.16744	487.8	0.29555
478.4	0.16996	488	0.29578
478.6	0.17222	488.2	0.29589
478.8	0.17667	488.4	0.29533
479	0.18068	488.6	0.2951
479.2	0.18321	488.8	0.29488
479.4	0.18695	489	0.29477
479.6	0.19057	489.2	0.29443
479.8	0.19404	489.4	0.29387
480	0.1975	489.6	0.29309
480.2	0.19942	489.8	0.29275
480.4	0.20431	490	0.2923
480.6	0.20706	490.2	0.29152
480.8	0.21091	490.4	0.29062
481	0.213	490.6	0.29006
481.2	0.21679	490.8	0.28838
481.4	0.21855	491	0.28748
481.6	0.22135	491.2	0.28636
481.8	0.22427	491.4	0.2849
482	0.22751	491.6	0.28322
482.2	0.23097	491.8	0.2821
482.4	0.23333	492	0.28064
482.6	0.23432	492.2	0.27896
482.8	0.23619	492.4	0.27694
483	0.23817	492.6	0.2756
483.2	0.24037	492.8	0.2738
483.4	0.24389	493	0.27212
483.6	0.24631	493.2	0.26977
483.8	0.24647	493.4	0.26786
484	0.24702	493.6	0.26529
484.2	0.24735	493.8	0.26316
484.4	0.24768	494	0.26069
484.6	0.24768	494.2	0.25901
484.8	0.24768	494.4	0.25632
485	0.24768	494.6	0.25407
485.2	0.24768	494.8	0.2515
485.4	0.24751	495	0.24937
485.6	0.24664	495.2	0.24634
485.8	0.24658	495.4	0.2441
486	0.24614	495.6	0.24118
486.2	0.24559	495.8	0.23905
486.4	0.24334	496	0.23614
486.6	0.24224	496.2	0.23378
486.8	0.24218	496.4	0.23087
487	0.24136	496.6	0.22829
487.2	0.23878	496.8	0.22482
487.4	0.23861	497	0.22257
487.6	0.23729	497.2	0.21955
487.8	0.23515	497.4	0.21708
488	0.23339	497.6	0.21361
488.2	0.23257	497.8	0.21114
488.4	0.22987	498	0.208
488.6	0.22806	498.2	0.2052
488.8	0.22427	498.4	0.20217
489	0.22234	498.6	0.20004
489.2	0.21987	498.8	0.1969
489.4	0.21701	499	0.19466
489.6	0.21393	499.2	0.19152
489.8	0.21195	499.4	0.18939
490	0.20954	499.6	0.18637
490.2	0.20684	499.8	0.18379
490.4	0.20223	500	0.18065
490.6	0.20096	500.2	0.17852
490.8	0.19728	500.4	0.1756
491	0.19299	500.6	0.17325
491.2	0.18909	500.8	0.17045
491.4	0.18733	501	0.16832
491.6	0.18354	501.2	0.16529
491.8	0.18002	501.4	0.16271
492	0.1765	501.6	0.15991
492.2	0.17392	501.8	0.15778
492.4	0.17013	502	0.15509
492.6	0.16694	502.2	0.15307
492.8	0.16293	502.4	0.15049
493	0.15952	502.6	0.14836
493.2	0.15562	502.8	0.14567
493.4	0.15221	503	0.14365
493.6	0.14765	503.2	0.14108
493.8	0.14413	503.4	0.13906
494	0.13984	503.6	0.1367
494.2	0.13666	503.8	0.13491
494.4	0.13281	504	0.13278
494.6	0.13072	504.2	0.13076
494.8	0.12599	504.4	0.12841
495	0.12259	504.6	0.12662
495.2	0.1189	504.8	0.12415
495.4	0.11693	505	0.12258
495.6	0.11396	505.2	0.1209
495.8	0.1117	505.4	0.11944
496	0.10824	505.6	0.11753
496.2	0.10593	505.8	0.11597
496.4	0.1017	506	0.11395
496.6	0.09917	506.2	0.11249
496.8	0.09637	506.4	0.11064
497	0.09456	506.6	0.10931
497.2	0.09214	506.8	0.1077
497.4	0.09016	507	0.10635
497.6	0.08813	507.2	0.10464
497.8	0.08587	507.4	0.10341
498	0.08439	507.6	0.10159
498.2	0.08202	507.8	0.10054
498.4	0.08038	508	0.09889
498.6	0.07955	508.2	0.09786
498.8	0.07752	508.4	0.09664
499	0.07559	508.6	0.09568
499.2	0.07411	508.8	0.09437
499.4	0.07279	509	0.0934
499.6	0.07065	509.2	0.09213
499.8	0.06971	509.4	0.09101
500	0.06806	509.6	0.08974
500.2	0.06762	509.8	0.08893
500.4	0.06652	510	0.08772
500.6	0.06565	510.2	0.0868
500.8	0.06482	510.4	0.08569
501	0.06372	510.6	0.08497
501.2	0.06257	510.8	0.08386
501.4	0.06169	511	0.0829
501.6	0.06103	511.2	0.08191
501.8	0.06086	511.4	0.08125
502	0.05938	511.6	0.08032
502.2	0.05839	511.8	0.07958
502.4	0.05746	512	0.07862
502.6	0.0574	512.2	0.07782
502.8	0.05652	512.4	0.07693
503	0.05564	512.6	0.07619
503.2	0.05542	512.8	0.07545
503.4	0.05471	513	0.07481
503.6	0.05397	513.2	0.07407
503.8	0.05392	513.4	0.07348
504	0.05358	513.6	0.07281
504.2	0.0533	513.8	0.07231
504.4	0.05248	514	0.07145
504.6	0.05244	514.2	0.07096
504.8	0.05195	514.4	0.07018
505	0.05115	514.6	0.06967
505.2	0.04998	514.8	0.06898
505.4	0.04957	515	0.06856
505.6	0.04953	515.2	0.06803
505.8	0.04909	515.4	0.06738
506	0.04872	515.6	0.06684
506.2	0.04824	515.8	0.06633
506.4	0.04822	516	0.06583
506.6	0.04808	516.2	0.06526
506.8	0.04721	516.4	0.0648
507	0.04707	516.6	0.0644
507.2	0.04699	516.8	0.06392
507.4	0.0469	517	0.06351
507.6	0.04683	517.2	0.06305
507.8	0.04673	517.4	0.06273
508	0.04651	517.6	0.06224
508.2	0.04605	517.8	0.06184
508.4	0.04598	518	0.06142
508.6	0.04536	518.2	0.06111
508.8	0.04487	518.4	0.06067
509	0.0444	518.6	0.06027
509.2	0.0443	518.8	0.05989
509.4	0.04392	519	0.05963
509.6	0.04389	519.2	0.05904
509.8	0.04357	519.4	0.05873
510	0.04334	519.6	0.0584
510.2	0.04332	519.8	0.0581
510.4	0.04323	520	0.05775
510.6	0.04243	520.2	0.05743
510.8	0.04237	520.4	0.05712
511	0.04237	520.6	0.05683
511.2	0.04235	520.8	0.05642
511.4	0.04234	521	0.05616
511.6	0.04234	521.2	0.05572
511.8	0.04219	521.4	0.05545
512	0.04219	521.6	0.05507
512.2	0.04234	521.8	0.05475
512.4	0.04234	522	0.0544
512.6	0.04256	522.2	0.05409
512.8	0.04264	522.4	0.05373
513	0.04264	522.6	0.05354
513.2	0.04264	522.8	0.05315
513.4	0.04264	523	0.05286
513.6	0.04255	523.2	0.0525
513.8	0.04251	523.4	0.05228
514	0.04246	523.6	0.05183
514.2	0.04246	523.8	0.05147
514.4	0.04251	524	0.05108
514.6	0.04251	524.2	0.05079
514.8	0.04258	524.4	0.05033
515	0.04287	524.6	0.05003
515.2	0.04287	524.8	0.04968
515.4	0.04287	525	0.04932
515.6	0.04287	525.2	0.04901
515.8	0.04283	525.4	0.04865
516	0.0424	525.6	0.04836
516.2	0.0424	525.8	0.04795
516.4	0.0424	526	0.04765
516.6	0.0424	526.2	0.04737
516.8	0.04317	526.4	0.04698
517	0.04373	526.6	0.04662
517.2	0.04373	526.8	0.04617
517.4	0.04373	527	0.04589
517.6	0.04373	527.2	0.04553
517.8	0.04373	527.4	0.04514
518	0.04372	527.6	0.04479
518.2	0.04363	527.8	0.04453
518.4	0.04363	528	0.04404
518.6	0.04369	528.2	0.04374
518.8	0.04363	528.4	0.04331
519	0.0435	528.6	0.04298
519.2	0.04333	528.8	0.04243
519.4	0.04323	529	0.04221
519.6	0.04318	529.2	0.04178
519.8	0.04252	529.4	0.04136
520	0.04251	529.6	0.04097
520.2	0.04247	529.8	0.04054
520.4	0.04211	530	0.0401
520.6	0.04208	530.2	0.03973
520.8	0.04174	530.4	0.0393
521	0.04147	530.6	0.03899
521.2	0.04136	530.8	0.03856
521.4	0.04113	531	0.03819
521.6	0.04063	531.2	0.03772
521.8	0.04052	531.4	0.03744
522	0.04034	531.6	0.03702
522.2	0.04026	531.8	0.03672
522.4	0.03977	532	0.03628
522.6	0.03975	532.2	0.03597
522.8	0.0395	532.4	0.03549
523	0.03941	532.6	0.03516
523.2	0.0394	532.8	0.03477
523.4	0.03923	533	0.03445
523.6	0.03905	533.2	0.03404
523.8	0.03887	533.4	0.03367
524	0.0378	533.6	0.03327
524.2	0.03759	533.8	0.03295
524.4	0.03711	534	0.03251
524.6	0.03685	534.2	0.03224
524.8	0.03648	534.4	0.03187
525	0.03615	534.6	0.03159
525.2	0.03592	534.8	0.0311
525.4	0.0356	535	0.03069
525.6	0.0355	535.2	0.0303
525.8	0.0355	535.4	0.0301
526	0.03532	535.6	0.0297
526.2	0.03466	535.8	0.02946
526.4	0.03465	536	0.02914
526.6	0.03399	536.2	0.0289
526.8	0.03376	536.4	0.02847
527	0.03345	536.6	0.02812
527.2	0.0331	536.8	0.02774
527.4	0.03281	537	0.02745
527.6	0.03248	537.2	0.02707
527.8	0.03193	537.4	0.02675
528	0.03151	537.6	0.02641
528.2	0.03125	537.8	0.02613
528.4	0.03084	538	0.02576
528.6	0.03047	538.2	0.02548
528.8	0.03032	538.4	0.02513
529	0.03007	538.6	0.02485
529.2	0.02937	538.8	0.02454
529.4	0.02909	539	0.02431
529.6	0.02904	539.2	0.024
529.8	0.02855	539.4	0.02374
530	0.0281	539.6	0.02339
530.2	0.02748	539.8	0.02307
530.4	0.0273	540	0.02276
530.6	0.0272	540.2	0.02253
530.8	0.02674	540.4	0.02227
531	0.0265	540.6	0.02208
531.2	0.02624	540.8	0.02176
531.4	0.02575	541	0.02156
531.6	0.02526	541.2	0.02123
531.8	0.02507	541.4	0.02093
532	0.02425	541.6	0.02063
532.2	0.02408	541.8	0.02045
532.4	0.02406	542	0.02017
532.6	0.02392	542.2	0.01994
532.8	0.02323	542.4	0.0197
533	0.0231	542.6	0.01952
533.2	0.02274	542.8	0.01926
533.4	0.02274	543	0.01901
533.6	0.02245	543.2	0.01871
533.8	0.02171	543.4	0.0185
534	0.02167	543.6	0.01826
534.2	0.02149	543.8	0.01806
534.4	0.02123	544	0.01782
534.6	0.02084	544.2	0.01764
534.8	0.02065	544.4	0.01739
535	0.02033	544.6	0.01717
535.2	0.02009	544.8	0.01695
535.4	0.02005	545	0.01671
535.6	0.01937	545.2	0.01646
535.8	0.01935	545.4	0.0163
536	0.01892	545.6	0.01608
536.2	0.01851	545.8	0.01587
536.4	0.01826	546	0.01569
536.6	0.01804	546.2	0.01548
536.8	0.0177	546.4	0.01529
537	0.01752	546.6	0.01513
537.2	0.01741	546.8	0.01495
537.4	0.01725	547	0.01478
537.6	0.01681	547.2	0.01455
537.8	0.01676	547.4	0.01441
538	0.01655	547.6	0.01424
538.2	0.01637	547.8	0.01412
538.4	0.0163	548	0.01398
538.6	0.01622	548.2	0.01383
538.8	0.01606	548.4	0.01365
539	0.01597	548.6	0.0135
539.2	0.01569	548.8	0.01335
539.4	0.0153	549	0.01324
539.6	0.01505	549.2	0.01304
539.8	0.01479	549.4	0.01296
540	0.01458	549.6	0.01275
540.2	0.01428	549.8	0.01263
540.4	0.01394	550	0.01247
540.6	0.01354	550.2	0.01235
540.8	0.0135	550.4	0.01222
541	0.01326	550.6	0.01211
541.2	0.01315	550.8	0.012
541.4	0.01303	551	0.01189
541.6	0.01298	551.2	0.01176
541.8	0.0129	551.4	0.01159
542	0.01277	551.6	0.01143
542.2	0.01269	551.8	0.01133
542.4	0.01237	552	0.01117
542.6	0.01226	552.2	0.0111
542.8	0.01198	552.4	0.01092
543	0.01166	552.6	0.0108
543.2	0.01154	552.8	0.01069
543.4	0.01152	553	0.01062
543.6	0.01144	553.2	0.01049
543.8	0.01132	553.4	0.0104
544	0.0112	553.6	0.01028
544.2	0.011	553.8	0.01021
544.4	0.01096	554	0.01009
544.6	0.0109	554.2	0.01002
544.8	0.01085	554.4	0.00987
545	0.01077	554.6	0.00974
545.2	0.01052	554.8	0.00962
545.4	0.01048	555	0.00958
545.6	0.01038	555.2	0.00951
545.8	0.01029	555.4	0.00941
546	0.01023	555.6	0.00926
546.2	0.01023	555.8	0.00921
546.4	0.01018	556	0.00908
546.6	0.01015	556.2	0.009
546.8	0.01014	556.4	0.0089
547	0.01008	556.6	0.00881
547.2	0.01001	556.8	0.00873
547.4	0.0099	557	0.00869
547.6	0.00986	557.2	0.0086
547.8	0.00983	557.4	0.00849
548	0.00981	557.6	0.00839
548.2	0.00976	557.8	0.00834
548.4	0.00972	558	0.00824
548.6	0.00961	558.2	0.00822
548.8	0.00953	558.4	0.00816
549	0.00923	558.6	0.0081
549.2	0.00922	558.8	0.008
549.4	0.00918	559	0.00793
549.6	0.00918	559.2	0.00788
549.8	0.00916	559.4	0.00781
550	0.0091	559.6	0.00771
550.2	0.0091	559.8	0.00765
550.4	0.00901	560	0.00756
550.6	0.009	560.2	0.00748
550.8	0.009	560.4	0.00737
551	0.009	560.6	0.00731
551.2	0.009	560.8	0.00724
551.4	0.00899	561	0.00718
551.6	0.00895	561.2	0.00709
551.8	0.00891	561.4	0.00705
552	0.00891	561.6	0.00697
552.2	0.00891	561.8	0.00689
552.4	0.0088	562	0.0068
552.6	0.00867	562.2	0.00677
552.8	0.00859	562.4	0.00666
553	0.00859	562.6	0.0066
553.2	0.00859	562.8	0.00656
553.4	0.00867	563	0.00645
553.6	0.00859	563.2	0.0064
553.8	0.00859	563.4	0.00634
554	0.00853	563.6	0.00626
554.2	0.00853	563.8	0.00624
554.4	0.00846	564	0.00616
554.6	0.00842	564.2	0.0061
554.8	0.00841	564.4	0.00604
555	0.00835	564.6	0.00601
555.2	0.00816	564.8	0.00593
555.4	0.00801	565	0.00586
555.6	0.00791	565.2	0.00579
555.8	0.00791	565.4	0.00572
556	0.00791	565.6	0.00565
556.2	0.00791	565.8	0.00562
556.4	0.00791	566	0.00556
556.6	0.00791	566.2	0.0055
556.8	0.00796	566.4	0.00542
557	0.00796	566.6	0.00537
557.2	0.00791	566.8	0.0053
557.4	0.0079	567	0.00525
557.6	0.00783	567.2	0.0052
557.8	0.00772	567.4	0.00512
558	0.00763	567.6	0.00505
558.2	0.00761	567.8	0.00498
558.4	0.00759	568	0.00492
558.6	0.00759	568.2	0.00488
558.8	0.00757	568.4	0.00482
559	0.00755	568.6	0.00477
559.2	0.00728	568.8	0.00468
559.4	0.00725	569	0.00465
559.6	0.00723	569.2	0.00459
559.8	0.0072	569.4	0.00456
560	0.00711	569.6	0.00451
560.2	0.00694	569.8	0.00445
560.4	0.00691	570	0.00439
560.6	0.00686	570.2	0.00435
560.8	0.00686	570.4	0.00428
561	0.00685	570.6	0.00423
561.2	0.00685	570.8	0.00417
561.4	0.00684	571	0.00414
561.6	0.00677	571.2	0.00405
561.8	0.00662	571.4	0.00398
562	0.00662	571.6	0.00392
562.2	0.0065	571.8	0.00388
562.4	0.00645	572	0.00383
562.6	0.00642	572.2	0.00379
562.8	0.0064	572.4	0.00376
563	0.0064	572.6	0.00373
563.2	0.00627	572.8	0.00368
563.4	0.00623	573	0.00365
563.6	0.00622	573.2	0.00359
563.8	0.00607	573.4	0.00355
564	0.00593	573.6	0.00347
564.2	0.0059	573.8	0.00344
564.4	0.00583	574	0.00337
564.6	0.00581	574.2	0.00334
564.8	0.00576	574.4	0.00327
565	0.00573	574.6	0.00325
565.2	0.00573	574.8	0.00323
565.4	0.00568	575	0.0032
565.6	0.00568	575.2	0.00316
565.8	0.00567	575.4	0.00313
566	0.00567	575.6	0.00305
566.2	0.00565	575.8	0.00299
566.4	0.00564	576	0.00296
566.6	0.00556	576.2	0.00291
566.8	0.00547	576.4	0.00285
567	0.0054	576.6	0.00282
567.2	0.00537	576.8	0.00278
567.4	0.00537	577	0.00276
567.6	0.00537	577.2	0.00273
567.8	0.00537	577.4	0.00269
568	0.00533	577.6	0.00267
568.2	0.00531	577.8	0.00261
568.4	0.00529	578	0.00255
568.6	0.00526	578.2	0.00253
568.8	0.00526	578.4	0.00247
569	0.00526	578.6	0.00245
569.2	0.00519	578.8	0.00242
569.4	0.00497	579	0.00238
569.6	0.00497	579.2	0.00236
569.8	0.00496	579.4	0.00235
570	0.00494	579.6	0.0023
570.2	0.0049	579.8	0.00228
570.4	0.00488	580	0.00223
570.6	0.0048	580.2	0.0022
570.8	0.0048	580.4	0.00219
571	0.00469	580.6	0.00216
571.2	0.00455	580.8	0.00211
571.4	0.00453	581	0.0021
571.6	0.00452	581.2	0.00206
571.8	0.00451	581.4	0.00204
572	0.00449	581.6	0.00202
572.2	0.00449	581.8	0.00198
572.4	0.00448	582	0.00195
572.6	0.00439	582.2	0.00193
572.8	0.00439	582.4	0.0019
573	0.00438	582.6	0.0019
573.2	0.00438	582.8	0.00186
573.4	0.00431	583	0.00183
573.6	0.00429	583.2	0.00179
573.8	0.00414	583.4	0.00178
574	0.00405	583.6	0.00176
574.2	0.00402	583.8	0.00173
574.4	0.00399	584	0.00171
574.6	0.00388	584.2	0.00168
574.8	0.00377	584.4	0.00166
575	0.00373	584.6	0.00163
575.2	0.00368	584.8	0.0016
575.4	0.00367	585	0.00158
575.6	0.00365	585.2	0.00158
575.8	0.00354	585.4	0.00155
576	0.00354	585.6	0.00153
576.2	0.00353	585.8	0.00151
576.4	0.00351	586	0.00148
576.6	0.00342	586.2	0.00147
576.8	0.00344	586.4	0.00144
577	0.00348	586.6	0.00143
577.2	0.00346	586.8	0.00141
577.4	0.00344	587	0.00139
577.6	0.00344	587.2	0.00137
577.8	0.00346	587.4	0.00135
578	0.00346	587.6	0.00133
578.2	0.00346	587.8	0.00131
578.4	0.00344	588	0.00129
578.6	0.00341	588.2	0.00128
578.8	0.00338	588.4	0.00126
579	0.0033	588.6	0.00125
579.2	0.00328	588.8	0.00124
579.4	0.0032	589	0.00122
579.6	0.0032	589.2	0.0012
579.8	0.0032	589.4	0.00117
580	0.00318	589.6	0.00117
580.2	0.00313	589.8	0.00115
580.4	0.00301	590	0.00114
580.6	0.00301	590.2	0.00111
580.8	0.003	590.4	0.0011
581	0.00299	590.6	0.00109
581.2	0.00297	590.8	0.00107
581.4	0.00297	591	0.00106
581.6	0.00297	591.2	0.00104
581.8	0.00289	591.4	0.00104
582	0.00284	591.6	0.00102
582.2	0.00281	591.8	0.000999948
582.4	0.00277	592	0.000987168
582.6	0.00274	592.2	0.000970129
582.8	0.00273	592.4	0.000965532
583	0.00271	592.6	0.000969904
583.2	0.00268	592.8	0.000964187
583.4	0.00266	593	0.000945803
583.6	0.00265	593.2	0.000924503
583.8	0.00264	593.4	0.00090993
584	0.00255	593.6	0.00090085
584.2	0.00243	593.8	0.000881792
584.4	0.00239	594	0.000874506
584.6	0.00239	594.2	0.000872936
584.8	0.00239	594.4	0.000855224
585	0.00239	594.6	0.000841324
585.2	0.00242	594.8	0.000842893
585.4	0.00242	595	0.000835158
585.6	0.00242	595.2	0.000827871
585.8	0.00242	595.4	0.000819912
586	0.00242	595.6	0.000802424
586.2	0.00243	595.8	0.000794241
586.4	0.00243	596	0.000783255
586.6	0.00249	596.2	0.000764758
586.8	0.00249	596.4	0.000756238
587	0.00249	596.6	0.000755005
587.2	0.00249	596.8	0.00075153
587.4	0.00246	597	0.000747831
587.6	0.00234	597.2	0.000734491
587.8	0.00232	597.4	0.000728549
588	0.00223	597.6	0.000713079
588.2	0.00219	597.8	0.000704111
588.4	0.00218	598	0.000690883
588.6	0.00217	598.2	0.000688865
588.8	0.00217	598.4	0.000689202
589	0.00217	598.6	0.000668351
589.2	0.00216	598.8	0.000655907
589.4	0.00214	599	0.000646155
589.6	0.00213	599.2	0.000635393
589.8	0.00212	599.4	0.000633711
590	0.00205	599.6	0.000631805
590.2	0.00204	599.8	0.000627882
590.4	0.00203	600	0.000609273
590.6	0.00197	600.2	0.000604565
590.8	0.00197	600.4	0.000600529
591	0.00197	600.6	0.000593018
591.2	0.00196	600.8	0.000576764
591.4	0.00195	601	0.000573513
591.6	0.00195	601.2	0.000562639
591.8	0.00192	601.4	0.00055524
592	0.00191	601.6	0.000556809
592.2	0.00191	601.8	0.000539882
592.4	0.00191	602	0.000534501
592.6	0.00191	602.2	0.000528448
592.8	0.00191	602.4	0.000520937
593	0.00191	602.6	0.000510511
593.2	0.00189	602.8	0.000505803
593.4	0.00189	603	0.000499862
593.6	0.00187	603.2	0.000506588
593.8	0.00187	603.4	0.000506812
594	0.00187	603.6	0.000501431
594.2	0.00189	603.8	0.000494032
594.4	0.00191	604	0.000479571
594.6	0.00191	604.2	0.00047576
594.8	0.00191	604.4	0.000469258
595	0.00191	604.6	0.000465334
595.2	0.00177	604.8	0.000460962
595.4	0.00173	605	0.000457151
595.6	0.00171	605.2	0.000442354
595.8	0.00164	605.4	0.00044695
596	0.00164	605.6	0.000432376
596.2	0.00164	605.8	0.000431816
596.4	0.00162	606	0.000417467
596.6	0.00162	606.2	0.000413207
596.8	0.00164	606.4	0.000414552
597	0.00164	606.6	0.000417915
597.2	0.00164	606.8	0.000408162
597.4	0.00166	607	0.000399419
597.6	0.00166	607.2	0.000401773
597.8	0.00168	607.4	0.000397513
598	0.0017	607.6	0.00039684
598.2	0.0017	607.8	0.000386639
598.4	0.00173	608	0.000383612
598.6	0.00173	608.2	0.000378904
598.8	0.00173	608.4	0.00037442
599	0.0017	608.6	0.000374756
599.2	0.00168	608.8	0.000370496
599.4	0.00162	609	0.000365115
599.6	0.00158	609.2	0.000357717
599.8	0.00158	609.4	0.000352896
600	0.00155	609.6	0.000339444
600.2	0.00154	609.8	0.000336529
600.4	0.00154	610	0.000327561
600.6	0.00155	610.2	0.000330812
600.8	0.00155	610.4	0.000329691
601	0.00158	610.6	0.000322068
601.2	0.00155	610.8	0.000318705
601.4	0.00155	611	0.000315006
601.6	0.00155	611.2	0.000314221
601.8	0.00155	611.4	0.000313997
602	0.00155	611.6	0.000310522
602.2	0.00155	611.8	0.000307944
602.4	0.00152	612	0.000306598
602.6	0.00144	612.2	0.000307944
602.8	0.00139	612.4	0.000300096
603	0.00139	612.6	0.000292249
603.2	0.00139	612.8	0.000284514
603.4	0.00137	613	0.000287093
603.6	0.00135	613.2	0.000277452
603.8	0.00135	613.4	0.000276331
604	0.00136	613.6	0.000277228
604.2	0.00138	613.8	0.00027151
604.4	0.00136	614	0.000272183
604.6	0.00134	614.2	0.000268147
604.8	0.00134	614.4	0.000264
605	0.00134	614.6	0.00026243
605.2	0.00132	614.8	0.00025391
605.4	0.00128	615	0.000247857
605.6	0.00125	615.2	0.000240234
605.8	0.00124	615.4	0.00024214
606	0.00123	615.6	0.000239786
606.2	0.00122	615.8	0.000241355
606.4	0.00122	616	0.000232947
606.6	0.00117	616.2	0.000234517
606.8	0.00112	616.4	0.000231266
607	0.00112	616.6	0.0002288
607.2	0.00112	616.8	0.000232947
607.4	0.00112	617	0.000229024
607.6	0.00117	617.2	0.000227454
607.8	0.00118	617.4	0.000220168
608	0.00119	617.6	0.000216244
608.2	0.00121	617.8	0.000209182
608.4	0.00121	618	0.000199429
608.6	0.00121	618.2	0.000197411
608.8	0.00121	618.4	0.000201223
609	0.00121	618.6	0.000201335
609.2	0.00118	618.8	0.000196626
609.4	0.00114	619	0.000193263
609.6	0.00113	619.2	0.00018934
609.8	0.00112	619.4	0.000184744
610	0.0011	619.6	0.000182502
610.2	0.0011	619.8	0.000175663
610.4	0.0011	620	0.00017443
610.6	0.0011	620.2	0.000180484
610.8	0.0011	620.4	0.000174879
611	0.0011	620.6	0.000175776
611.2	0.0011	620.8	0.000179027
611.4	0.0011	621	0.000178914
611.6	0.0011	621.2	0.000170507
611.8	0.0011	621.4	0.000166247
612	0.00105	621.6	0.000160978
612.2	0.00103	621.8	0.000162884
612.4	0.00101	622	0.000162323
612.6	0.001	622.2	0.000161763
612.8	0.00099811	622.4	0.000160418
613	0.00099811	622.6	0.000155261
613.2	0.000991515	622.8	0.000155149
613.4	0.000979973	623	0.000151562
613.6	0.000979973	623.2	0.000151562
613.8	0.00097008	623.4	0.000141809
614	0.000958538	623.6	0.000135755
614.2	0.00095524	623.8	0.000139903
614.4	0.000884889	624	0.000140127
614.6	0.000884889	624.2	0.000133177
614.8	0.000884889	624.4	0.000131944
615	0.000884889	624.6	0.000134858
615.2	0.000927209	624.8	0.000132504
615.4	0.000927209	625	0.000130486
615.6	0.000927209	625.2	0.000127348
615.8	0.000927209	625.4	0.000129702
616	0.000944797	625.6	0.000126451
616.2	0.000869499	625.8	0.000125778
616.4	0.000869499	626	0.000120734
616.6	0.000869499	626.2	0.000120846
616.8	0.000869499	626.4	0.000118828
617	0.000869499	626.6	0.000120173
617.2	0.000888186	626.8	0.000120173
617.4	0.000884889	627	0.000119725
617.6	0.000884889	627.2	0.000114568
617.8	0.000884889	627.4	0.000108514
618	0.000864003	627.6	0.000107506
618.2	0.000884889	627.8	0.000104927
618.4	0.000884889	628	0.00010616
618.6	0.000880492	628.2	0.00010616
618.8	0.000880492	628.4	0.000105151
619	0.000888736	628.6	9.92101e-05
619.2	0.000912919	628.8	9.87616e-05
619.4	0.000925561	629	9.56228e-05
619.6	0.000925561	629.2	9.62954e-05
619.8	0.000925561	629.4	9.96585e-05
620	0.000925561	629.6	9.41655e-05
620.2	0.000851911	629.8	9.70801e-05
620.4	0.000811789	630	9.3605e-05
620.6	0.000806843	630.2	8.93451e-05
620.8	0.000806843	630.4	8.73273e-05
621	0.00076782	630.6	8.6991e-05
621.2	0.000806843	630.8	8.49731e-05
621.4	0.00076782	631	8.17222e-05
621.6	0.00076782	631.2	8.18343e-05
621.8	0.00076782	631.4	8.01528e-05
622	0.000774965	631.6	7.83591e-05
622.2	0.00076782	631.8	8.29553e-05
622.4	0.000760674	632	8.19464e-05
622.6	0.000743636	632.2	7.91438e-05
622.8	0.000725499	632.4	7.83591e-05
623	0.000743087	632.6	7.8247e-05
623.2	0.000743087	632.8	7.56687e-05
623.4	0.000703514	633	7.73502e-05
623.6	0.000693621	633.2	7.47719e-05
623.8	0.000677682	633.4	7.73502e-05
624	0.000673834	633.6	7.25298e-05
624.2	0.000673834	633.8	7.08483e-05
624.4	0.000673834	634	6.89426e-05
624.6	0.000673834	634.2	6.54674e-05
624.8	0.000663392	634.4	6.40101e-05
625	0.000661743	634.6	6.32254e-05
625.2	0.000683728	634.8	6.32254e-05
625.4	0.000683728	635	6.30012e-05
625.6	0.000671086	635.2	6.0647e-05
625.8	0.000671086	635.4	6.01986e-05
626	0.000670537	635.6	6.17681e-05
626.2	0.000671086	635.8	6.53553e-05
626.4	0.000681529	636	6.79337e-05
626.6	0.000671086	636.2	6.46827e-05
626.8	0.000670537	636.4	6.24407e-05
627	0.000681529	636.6	5.9526e-05
627.2	0.000672735	636.8	5.78445e-05
627.4	0.000672735	637	5.60509e-05
627.6	0.000662842	637.2	5.43694e-05
627.8	0.000642506	637.4	5.34725e-05
628	0.00056391	637.6	5.64993e-05
628.2	0.00056391	637.8	5.16789e-05
628.4	0.00056391	638	5.23515e-05
628.6	0.00056391	638.2	5.03337e-05
628.8	0.000598536	638.4	4.99974e-05
629	0.000602384	638.6	5.04458e-05
629.2	0.000602384	638.8	5.01095e-05
629.4	0.000602384	639	4.91006e-05
629.6	0.000598536	639.2	4.96611e-05
629.8	0.000597987	639.4	5.27999e-05
630	0.000585895	639.6	5.07821e-05
630.2	0.000585895	639.8	4.82038e-05
630.4	0.000583147	640	4.28229e-05
630.6	0.000583147	640.2	4.48407e-05
630.8	0.000561712	640.4	4.4056e-05
631	0.000532582	640.6	4.49528e-05
631.2	0.00049246	640.8	4.46165e-05
631.4	0.000487513	641	4.32713e-05
631.6	0.000479269	641.2	4.10292e-05
631.8	0.000479269	641.4	4.00203e-05
632	0.000472673	641.6	4.19261e-05
632.2	0.000472673	641.8	4.2935e-05
632.4	0.000479269	642	4.15898e-05
632.6	0.000532032	642.2	4.24866e-05
632.8	0.000551819	642.4	4.25987e-05
633	0.000551819	642.6	3.8563e-05
633.2	0.000551819	642.8	3.84509e-05
633.4	0.000551819	643	3.8563e-05
633.6	0.000529834	643.2	3.75541e-05
633.8	0.00052104	643.4	3.47515e-05
634	0.000519941	643.6	3.48636e-05
634.2	0.000519941	643.8	3.35184e-05
634.4	0.000514445	644	3.37426e-05
634.6	0.000493559	644.2	3.16127e-05
634.8	0.000493559	644.4	3.03796e-05
635	0.000493559	644.6	3.0828e-05
635.2	0.000464429	644.8	3.03796e-05
635.4	0.000435299	645	3.18369e-05
635.6	0.000427055	645.2	3.03796e-05
635.8	0.000382536	645.4	3.39668e-05
636	0.000378139	645.6	2.98191e-05
636.2	0.000378139	645.8	2.7577e-05
636.4	0.000378139	646	2.51108e-05
636.6	0.000378139	646.2	2.8698e-05
636.8	0.000399574	646.4	3.02675e-05
637	0.000399574	646.6	2.66802e-05
637.2	0.000415513	646.8	2.73528e-05
637.4	0.000426505	647	2.98191e-05
637.6	0.000450139	647.2	2.93707e-05
637.8	0.000455086	647.4	2.73528e-05
638	0.000450139	647.6	2.65681e-05
638.2	0.00043475	647.8	2.71286e-05
638.4	0.000460582	648	2.80254e-05
638.6	0.000460582	648.2	2.38777e-05
638.8	0.000451238	648.4	2.34293e-05
639	0.00043475	648.6	2.72407e-05
639.2	0.000392978	648.8	2.71286e-05
639.4	0.000388582	649	2.70165e-05
639.6	0.000392978	649.2	2.58955e-05
639.8	0.000384185	649.4	2.29809e-05
640	0.000380887	649.6	2.32051e-05
640.2	0.000356704	649.8	2.07388e-05
640.4	0.000351207	650	2.25325e-05
640.6	0.000338016	650.2	2.15235e-05
640.8	0.000338016	650.4	1.89452e-05
641	0.000338016	650.6	1.93936e-05
641.2	0.000338016	650.8	1.72637e-05
641.4	0.000367696	651	1.69274e-05
641.6	0.000367696	651.2	1.83847e-05
641.8	0.000367696	651.4	2.02904e-05
642	0.000367696	651.6	1.79363e-05
642.2	0.000342413	651.8	2.33172e-05
642.4	0.000330871	652	2.08509e-05
642.6	0.000320429	652.2	1.95057e-05
642.8	0.000306688	652.4	2.12993e-05
643	0.0002902	652.6	1.99541e-05
643.2	0.000272612	652.8	1.96178e-05
643.4	0.000270963	653	1.88331e-05
643.6	0.000264367	653.2	1.8721e-05
643.8	0.000264367	653.4	1.73758e-05
644	0.000253925	653.6	1.60306e-05
644.2	0.000250627	653.8	1.60306e-05
644.4	0.000250627	654	1.28917e-05
644.6	0.000253925	654.2	1.04255e-05
644.8	0.000251726	654.4	1.0986e-05
645	0.000251726	654.6	9.08024e-06
645.2	0.000251726	654.8	1.22191e-05
645.4	0.000251726	655	1.73758e-05
645.6	0.000266566	655.2	1.55821e-05
645.8	0.000251726	655.4	1.44611e-05
646	0.00024623	655.6	1.36764e-05
646.2	0.00024568	655.8	1.39006e-05
646.4	0.000223146	656	1.49095e-05
646.6	0.000212153	656.2	1.25554e-05
646.8	0.000210505	656.4	1.31159e-05
647	0.000210505	656.6	1.18828e-05
647.2	0.000210505	656.8	1.14344e-05
647.4	0.000210505	657	1.17707e-05
647.6	0.000210505	657.2	9.41655e-06
647.8	0.000207207	657.4	9.86495e-06
648	0.000200611	657.6	9.64075e-06
648.2	0.000200611	657.8	1.00892e-05
648.4	0.000200611	658	1.12102e-05
648.6	0.000200611	658.2	1.30038e-05
648.8	0.00020226	658.4	1.50216e-05
649	0.00020226	658.6	1.45732e-05
649.2	0.00020226	658.8	1.51337e-05
649.4	0.00020226	659	1.28917e-05
649.6	0.000194566	659.2	1.18828e-05
649.8	0.000180275	659.4	1.25554e-05
650	0.000179726	659.6	9.19234e-06
650.2	0.000179726	659.8	1.03134e-05
650.4	0.000180275	660	6.3898e-06
650.6	0.000180275	660.2	7.28661e-06
650.8	0.000180275	660.4	9.75285e-06
651	0.000177527	660.6	1.10981e-05
651.2	0.00015884	660.8	9.52865e-06
651.4	0.000153344	661	1.07618e-05
651.6	0.000153344	661.2	1.14344e-05
651.8	0.000153344	661.4	9.30445e-06
652	0.000150596	661.6	9.19234e-06
652.2	0.000126413	661.8	1.08739e-05
652.4	0.000136306	662	7.06241e-06
652.6	0.000139604	662.2	8.63184e-06
652.8	0.000139604	662.4	8.07133e-06
653	0.000136306	662.6	6.1656e-06
653.2	0.000133008	662.8	4.93248e-06
653.4	0.000133008	663	7.73502e-06
653.6	0.000133008	663.2	6.72611e-06
653.8	0.000119817	663.4	5.82929e-06
654	9.01377e-05	663.6	4.70827e-06
654.2	9.01377e-05	663.8	5.49299e-06
654.4	9.01377e-05	664	5.26878e-06
654.6	9.34354e-05	664.2	5.38088e-06
654.8	0.000113222	664.4	5.94139e-06
655	0.000113222	664.6	6.95031e-06
655.2	0.000124764	664.8	9.86495e-06
655.4	0.000124764	665	8.18343e-06
655.6	0.000124764	665.2	7.51082e-06
655.8	0.000124764	665.4	7.06241e-06
656	9.28858e-05	665.6	1.26675e-05
656.2	6.92522e-05	665.8	1.04255e-05
656.4	6.48552e-05	666	9.97706e-06
656.6	4.56185e-05	666.2	4.70827e-06
656.8	3.62749e-05	666.4	2.80254e-06
657	3.62749e-05	666.6	6.72611e-07
657.2	3.62749e-05	666.8	2.24204e-06
657.4	4.56185e-05	667	2.91465e-06
657.6	6.98018e-05	667.2	3.58726e-06
657.8	7.0901e-05	667.4	4.82038e-06
658	7.0901e-05	667.6	2.80254e-06
658.2	7.63972e-05	667.8	3.13885e-06
658.4	0.000106626	668	5.04458e-06
658.6	0.000110474	668.2	4.48407e-06
658.8	0.000106626	668.4	3.58726e-06
659	8.13438e-05	668.6	7.06241e-06
659.2	8.13438e-05	668.8	6.1656e-06
659.4	8.13438e-05	669	4.25987e-06
659.6	5.38628e-05	669.2	5.26878e-06
659.8	5.38628e-05	669.4	8.29553e-06
660	5.38628e-05	669.6	5.49299e-06
660.2	4.7817e-05	669.8	3.25095e-06
660.4	4.7817e-05	670	1.34522e-06
660.6	4.7817e-05	670.2	3.13885e-06
660.8	7.25499e-05	670.4	6.1656e-06
661	7.25499e-05	670.6	2.46624e-06
661.2	6.81529e-05	670.8	1.00892e-06
661.4	5.4962e-05	671	2.80254e-06
661.6	5.4962e-05	671.2	2.57834e-06
661.8	6.81529e-05	671.4	2.46624e-06
662	5.4962e-05	671.6	3.69936e-06
662.2	5.38628e-05	671.8	3.81146e-06
662.4	5.27635e-05	672	3.02675e-06
662.6	5.27635e-05	672.2	5.38088e-06
662.8	5.27635e-05	672.4	3.13885e-06
663	6.43056e-05	672.6	3.13885e-06
663.2	6.43056e-05	672.8	2.12993e-06
663.4	6.43056e-05	673	5.60509e-07
663.6	6.98018e-05	673.2	1.23312e-06
663.8	7.85957e-05	673.4	2.57834e-06
664	7.85957e-05	673.6	1.56942e-06
664.2	7.85957e-05	673.8	1.68153e-06
664.4	7.85957e-05	674	1.00892e-06
664.6	5.38628e-05	674.2	0
664.8	5.38628e-05	674.4	2.57834e-06
665	4.50689e-05	674.6	1.34522e-06
665.2	4.23208e-05	674.8	2.24204e-06
665.4	4.23208e-05	675	3.69936e-06
665.6	4.23208e-05	675.2	3.13885e-06
665.8	4.23208e-05	675.4	4.70827e-06
666	4.23208e-05	675.6	2.69044e-06
666.2	5.66109e-05	675.8	4.70827e-06
666.4	5.77101e-05	676	2.35414e-06
666.6	7.20003e-05	676.2	1.56942e-06
666.8	7.20003e-05	676.4	2.12993e-06
667	7.20003e-05	676.6	2.24204e-06
667.2	5.77101e-05	676.8	3.36305e-06
667.4	7.41987e-05	677	3.02675e-06
667.6	7.41987e-05	677.2	2.12993e-06
667.8	7.41987e-05	677.4	1.34522e-06
668	4.67177e-05	677.6	1.23312e-06
668.2	4.67177e-05	677.8	2.91465e-06
668.4	4.45192e-05	678	3.25095e-06
668.6	4.45192e-05	678.2	3.25095e-06
668.8	4.45192e-05	678.4	4.25987e-06
669	4.7817e-05	678.6	4.93248e-06
669.2	0.000112672	678.8	1.56942e-06
669.4	0.000112672	679	7.06241e-06
669.6	0.000112672	679.2	5.82929e-06
669.8	0.000112672	679.4	4.03566e-06
670	6.70537e-05	679.6	6.72611e-06
670.2	5.05651e-05	679.8	7.28661e-06
670.4	3.57253e-05	680	5.94139e-06
670.6	3.13284e-05	--	--
670.8	2.80306e-05	--	--
671	2.80306e-05	--	--
671.2	3.57253e-05	--	--
671.4	3.57253e-05	--	--
671.6	3.57253e-05	--	--
671.8	2.52825e-05	--	--
672	2.52825e-05	--	--
672.2	2.52825e-05	--	--
672.4	2.52825e-05	--	--
672.6	7.69468e-06	--	--
672.8	7.69468e-06	--	--
673	7.69468e-06	--	--
673.2	7.69468e-06	--	--
673.4	1.48397e-05	--	--
673.6	2.52825e-05	--	--
673.8	2.52825e-05	--	--
674	4.342e-05	--	--
674.2	4.01223e-05	--	--
674.4	4.01223e-05	--	--
674.6	4.01223e-05	--	--
674.8	4.342e-05	--	--
675	4.01223e-05	--	--
675.2	3.84734e-05	--	--
675.4	2.47329e-05	--	--
675.6	1.42901e-05	--	--
675.8	1.37405e-05	--	--
676	1.37405e-05	--	--
676.2	1.37405e-05	--	--
676.4	0	--	--
676.6	1.42901e-05	--	--
676.8	1.42901e-05	--	--
677	1.70382e-05	--	--
677.2	1.86871e-05	--	--
677.4	2.63818e-05	--	--
677.6	1.86871e-05	--	--
677.8	2.63818e-05	--	--
678	2.80306e-05	--	--
678.2	3.9023e-05	--	--
678.4	3.95727e-05	--	--
678.6	3.9023e-05	--	--
678.8	3.95727e-05	--	--
679	5.05651e-05	--	--
679.2	5.05651e-05	--	--
679.4	3.95727e-05	--	--
	--	--	--
--	--	--	--
--	--	--	--
--	--	--	--
--	--	--	--
--	--	--	--
--	--	--	--
--	--	--	--
--	--	--	--
--	--	--	--
--	--	--	--
--	--	--	--
--	--	--	--
--	--	--	--
--	--	--	--
--	--	--	--
--	--	--	--
--	--	--	--
--	--	--	--
--	--	--	--
--	--	--	--
--	--	--	--
--	--	--	--
--	--	--	--
--	--	--	--
--	--	--	--
--	--	--	--
--	--	--	--
--	--	--	--
--	--	--	--
--	--	--	--
--	--	--	--
--	--	--	--
--	--	--	--
--	--	--	--
--	--	--	--
--	--	--	--
--	--	--	--
--	--	--	--
--	--	--	--
--	--	--	--
--	--	--	--
--	--	--	--
--	--	--	--
--	--	--	--
--	--	--	--
--	--	--	--
--	--	--	--
--	--	--	--
--	--	--	--
--	--	--	--
--	--	--	--
--	--	--	--
--	--	--	--
--	--	--	--
--	--	--	--
--	--	--	--
--	--	--	--
--	--	--	--
--	--	--	--
--	--	--	--
--	--	--	--
--	--	--	--
--	--	--	--
--	--	--	--
--	--	--	--
--	--	--	--
--	--	--	--
--	--	--	--
--	--	--	--
--	--	--	--
--	--	--	--
--	--	--	--
--	--	--	--
--	--	--	--
--	--	--	--
--	--	--	--
--	--	--	--
--	--	--	--
--	--	--	--
--	--	--	--
--	--	--	--
--	--	--	--
--	--	--	--
--	--	--	--
--	--	--	--
--	--	--	--
--	--	--	--
--	--	--	--
--	--	--	--
--	--	--	--
--	--	--	--
--	--	--	--
--	--	--	--
--	--	--	--
--	--	--	--
--	--	--	--
--	--	--	--
--	--	--	--
--		--	--
		--	--
		--	--
		--	--
		--	--
		--	--
		--	--
		--	--
		--	--
		--	--
		--	--
		--	--
		--	--
		--	--
		--	--
		--	--
		--	--
		--	--
		--	--
		--	--
		--	--
		--	--
		--	--
		--	--
		--	--
		--	--
		--	--
		--	--
		--	--
		--	--
		--	--
		--	--
		--	--
		--	--
		--	--
		--	--
		--	--
		--	--
		--	--
		--	--
		--	--
		--	--
		--	--
		--	--
		--	--
		--	--
		--	--
		--	--
		--	--
		--	--
		--	--
		--	--
		--	--
		--	--
		--	--
		--	--
		--	--
		--	--
		--	--
		--	--
		--	--
		--	--
		--	--
		--	--
		--	--
		--	--
		--	--
		--	--
		--	--
		--	--
		--	--
		--	--
		--	--
		--	--
		--	--
		--	--
		--	--
		--	--
		--	--
		--	--
		--	--
		--	--
		--	--
		--	--
		--	--
		--	--
		--	--
		--	--
		--	--
		--	--
		--	--
		--	--
		--	--
		--	--
		--	--
		--	--
		--	--
		--	--
		--	--
		--	--
		--	--
		--	--
		--	--
		--	--
		--	--
		--	--
		--	--
		--	--
		--	--
		--	--
		--	--
		--	--
		--	--
		--	--
		--	--
		--	--
		--	--
		--	--
		--	--
		--	--
		--	--
		--	--
		--	--
		--	--
		--	--
		--	--
		--	--
		--	--
		--	--
		--	--
		--	--
		--	--
		--	--
		--	--
		--	--
		--	--
		--	--
		--	--
		--	--
		--	--
		--	--
		--	--
		--	--
		--	--
		--	--
		--	--
		--	--
		--	--
		--	--
		--	--
		--	--
		--	--
		--	--
		--	--
		--	--
		--	--
		--	--
		--	--
		--	--
		--	--
		--	--
		--	--
		--	--
		--	--
		--	--
		--	--
		--	--
		--	--
		--	--
		--	--
		--	--
		--	--
		--	--
		--	--
		--	--
		--	--
		--	--
		--	--
		--	--
		--	--
		--	--
		--	--
		--	--
		--	--
		--	--
		--	--
		--	--
		--	--
		--	--
		--	--
		--	--
		--	--
		--	--
		--	--
		--	--
		--	--
		--	--
		--	--
		--	--
		--	--
		--	--
		--	--
		--	--
		--	--
		--	--
		--	--
		--	--
		--	--
		--	--
		--	--
		--	--
		--	--
		--	--
		--	--
		--	--
		--	--
		--	--
		--	--
		--	--
		--	--
		--	--
		--	--
		--	--
		--	--
		--	--
		--	--
		--	--
		--	--
		--	--
		--	--
		--	--
		--	--
		--	--
		--	--
		--	--
		--	--
		--	--
		--	--
		--	--
		--	--
		--	--
		--	--
		--	--
		--	--
		--	--
		--	--
		--	--
		--	--
		--	--
		--	--
		--	--
		--	--
		--	--
		--	--
		--	--
		--	--
		--	--
		--	--
		--	--
		--	--
		--	--
		--	--
		--	--
		--	--
		--	--
		--	--
		--	--
		--	--
		--	--
		--	--
		--	--
		--	--
		--	--
		--	--
		--	--
		--	--
		--	--
		--	--
		--	--
		--	--
		--	--
		--	--
		--	--
		--	--
		--	--
		--	--
		--	--
		--	--
		--	--
		--	--
		--	--
		--	--
		--	--
		--	--
		--	--
		--	--
		--	--
		--	--
		--	--
		--	--
		--	--
		--	--
		--	--
		--	--
		--	--
		--	--
		--	--
		--	--
		--	--
		--	--
		--	--
		--	--
		--	--
		--	--
		--	--
		--	--
		--	--
		--	--
		--	--
		--	--
		--	--
		--	--
		--	--
		--	--
		--	--
		--	--
		--	--
		--	--
		--	--
		--	--
		--	--
		--	--
		--	--
		--	--
		--	--
		--	--
		--	--
		--	--
		--	--
		--	--
		--	--
		--	--
		--	--
		--	--

## Sheet: Fig. 3d
Relationship between FWHM and Huang–Rhys factor of PtQS1 in various solvents
SM	FWHM
0.224	11.4
0.222	12.2
0.276	15.4
0.246	12.8
0.233	13
0.252	13.4
0.268	14.2
0.277	14.6
0.262	13.8
0.295	17.1
0.28	14.8
0.292	16.8
0.291	18.4
0.29	15.2
0.311	17

## Sheet: Fig. 3e
Transient decay curves of thermally evaporated 8 wt.% emitter:65 wt.% SiCzCz:27 wt.% SiTrzCz2 film (emitter: PtQS1 or PtON-TBBI)
PtON-TBBI		PtQS1
0	1	0	0
0.04	2	0.08	1500
0.08	1	0.16	1339
0.12	4	0.24	1152
0.16	454	0.32	1151
0.2	1571	0.4	1173
0.24	1458	0.48	1056
0.28	1488	0.56	1053
0.32	1377	0.64	973
0.36	1329	0.72	965
0.4	1239	0.8	914
0.44	1250	0.88	937
0.48	1248	0.96	876
0.52	1231	1.04	834
0.56	1252	1.12	885
0.6	1167	1.2	805
0.64	1104	1.28	786
0.68	1124	1.36	788
0.72	1052	1.44	761
0.76	1015	1.52	698
0.8	1047	1.6	741
0.84	1037	1.68	696
0.88	963	1.76	657
0.92	1042	1.84	657
0.96	957	1.92	650
1	923	2	613
1.04	869	2.08	623
1.08	890	2.16	604
1.12	904	2.24	561
1.16	843	2.32	585
1.2	867	2.4	597
1.24	836	2.48	529
1.28	781	2.56	493
1.32	835	2.64	495
1.36	805	2.72	502
1.4	792	2.8	470
1.44	758	2.88	464
1.48	760	2.96	458
1.52	699	3.04	425
1.56	707	3.12	423
1.6	663	3.2	417
1.64	655	3.28	409
1.68	655	3.36	382
1.72	653	3.44	398
1.76	684	3.52	347
1.8	649	3.6	322
1.84	582	3.68	358
1.88	614	3.76	352
1.92	578	3.84	337
1.96	577	3.92	300
2	568	4	291
2.04	572	4.08	291
2.08	537	4.16	317
2.12	548	4.24	335
2.16	490	4.32	258
2.2	485	4.4	307
2.24	475	4.48	249
2.28	509	4.56	254
2.32	490	4.64	244
2.36	449	4.72	249
2.4	427	4.8	236
2.44	467	4.88	228
2.48	437	4.96	243
2.52	416	5.04	230
2.56	392	5.12	228
2.6	385	5.2	208
2.64	393	5.28	197
2.68	395	5.36	195
2.72	359	5.44	150
2.76	370	5.52	198
2.8	353	5.6	185
2.84	352	5.68	186
2.88	351	5.76	174
2.92	367	5.84	181
2.96	310	5.92	157
3	343	6	203
3.04	337	6.08	145
3.08	321	6.16	152
3.12	313	6.24	165
3.16	291	6.32	169
3.2	307	6.4	115
3.24	263	6.48	145
3.28	308	6.56	166
3.32	283	6.64	145
3.36	284	6.72	117
3.4	265	6.8	112
3.44	301	6.88	116
3.48	274	6.96	115
3.52	287	7.04	119
3.56	257	7.12	104
3.6	245	7.2	95
3.64	232	7.28	121
3.68	235	7.36	103
3.72	234	7.44	92
3.76	245	7.52	104
3.8	254	7.6	89
3.84	203	7.68	84
3.88	244	7.76	84
3.92	197	7.84	90
3.96	196	7.92	104
4	200	8	93
4.04	210	8.08	88
4.08	199	8.16	79
4.12	198	8.24	71
4.16	191	8.32	87
4.2	180	8.4	64
4.24	171	8.48	59
4.28	176	8.56	94
4.32	155	8.64	58
4.36	183	8.72	54
4.4	158	8.8	78
4.44	166	8.88	72
4.48	168	8.96	62
4.52	148	9.04	50
4.56	163	9.12	71
4.6	154	9.2	62
4.64	146	9.28	53
4.68	139	9.36	54
4.72	146	9.44	53
4.76	151	9.52	34
4.8	137	9.6	55
4.84	139	9.68	28
4.88	136	9.76	50
4.92	120	9.84	49
4.96	125	9.92	46
5	129	10	46
5.04	129	10.08	53
5.08	142	10.16	41
5.12	119	10.24	45
5.16	105	10.32	22
5.2	104	10.4	40
5.24	120	10.48	48
5.28	95	10.56	41
5.32	104	10.64	42
5.36	101	10.72	39
5.4	96	10.8	34
5.44	106	10.88	24
5.48	94	10.96	27
5.52	89	11.04	25
5.56	101	11.12	32
5.6	79	11.2	38
5.64	83	11.28	24
5.68	88	11.36	31
5.72	103	11.44	27
5.76	79	11.52	34
5.8	83	11.6	27
5.84	87	11.68	24
5.88	74	11.76	20
5.92	80	11.84	22
5.96	64	11.92	17
6	74	12	23
6.04	76	12.08	27
6.08	70	12.16	23
6.12	65	12.24	21
6.16	91	12.32	21
6.2	74	12.4	25
6.24	59	12.48	23
6.28	80	12.56	26
6.32	70	12.64	17
6.36	69	12.72	15
6.4	59	12.8	26
6.44	68	12.88	20
6.48	54	12.96	19
6.52	70	13.04	27
6.56	54	13.12	23
6.6	70	13.2	16
6.64	52	13.28	9
6.68	49	13.36	20
6.72	52	13.44	11
6.76	54	13.52	23
6.8	55	13.6	11
6.84	54	13.68	12
6.88	55	13.76	13
6.92	54	13.84	17
6.96	49	13.92	17
7	52	14	13
7.04	49	14.08	16
7.08	50	14.16	9
7.12	37	14.24	10
7.16	45	14.32	21
7.2	35	14.4	11
7.24	47	14.48	16
7.28	43	14.56	7
7.32	36	14.64	15
7.36	34	14.72	8
7.4	35	14.8	8
7.44	41	14.88	7
7.48	41	14.96	8
7.52	40	15.04	10
7.56	46	15.12	10
7.6	28	15.2	4
7.64	42	15.28	7
7.68	48	15.36	7
7.72	42	15.44	14
7.76	42	15.52	6
7.8	33	15.6	4
7.84	33	15.68	7
7.88	27	15.76	8
7.92	32	15.84	5
7.96	34	15.92	14
8	32	16	7
8.04	27	16.08	8
8.08	32	16.16	4
8.12	35	16.24	3
8.16	37	16.32	11
8.2	31	16.4	1
8.24	31	16.48	4
8.28	26	16.56	8
8.32	25	16.64	6
8.36	38	16.72	10
8.4	44	16.8	4
8.44	25	16.88	5
8.48	33	16.96	8
8.52	35	17.04	7
8.56	28	17.12	4
8.6	17	17.2	10
8.64	22	17.28	6
8.68	24	17.36	6
8.72	20	17.44	3
8.76	30	17.52	2
8.8	18	17.6	8
8.84	17	17.68	8
8.88	19	17.76	7
8.92	18	17.84	3
8.96	20	17.92	4
9	22	18	6
9.04	17	18.08	8
9.08	18	18.16	4
9.12	17	18.24	6
9.16	19	18.32	5
9.2	21	18.4	7
9.24	18	18.48	10
9.28	20	18.56	4
9.32	23	18.64	3
9.36	23	18.72	7
9.4	18	18.8	3
9.44	15	18.88	7
9.48	23	18.96	2
9.52	20	19.04	1
9.56	17	19.12	10
9.6	23	19.2	1
9.64	24	19.28	1
9.68	25	19.36	3
9.72	19	19.44	2
9.76	21	19.52	7
9.8	17	19.6	6
9.84	19	19.68	2
9.88	18	19.76	8
9.92	17	19.84	4
9.96	14	19.92	2
10	17	20	7
10.04	17	20.08	3
10.08	19	20.16	3
10.12	14	20.24	7
10.16	14	20.32	3
10.2	12	20.4	4
10.24	14	20.48	1
10.28	16	20.56	1
10.32	21	20.64	4
10.36	16	20.72	2
10.4	15	20.8	2
10.44	12	20.88	2
10.48	14	20.96	2
10.52	11	21.04	3
10.56	14	21.12	1
10.6	9	21.2	4
10.64	16	21.28	3
10.68	8	21.36	4
10.72	20	21.44	2
10.76	8	21.52	4
10.8	13	21.6	3
10.84	11	21.68	3
10.88	11	21.76	1
10.92	18	21.84	2
10.96	15	21.92	3
11	13	22	1
11.04	14	22.08	2
11.08	18	22.16	0
11.12	11	22.24	1
11.16	12	22.32	1
11.2	8	22.4	3
11.24	8	22.48	1
11.28	7	22.56	3
11.32	12	22.64	2
11.36	15	22.72	1
11.4	8	22.8	2
11.44	12	22.88	2
11.48	11	22.96	3
11.52	8	23.04	1
11.56	8	23.12	4
11.6	10	23.2	0
11.64	7	23.28	2
11.68	4	23.36	0
11.72	11	23.44	2
11.76	9	23.52	2
11.8	2	23.6	1
11.84	4	23.68	0
11.88	7	23.76	1
11.92	6	23.84	1
11.96	10	23.92	1
12	10	24	3
12.04	7	24.08	1
12.08	13	24.16	1
12.12	5	24.24	3
12.16	9	24.32	0
12.2	5	24.4	2
12.24	10	24.48	2
12.28	9	24.56	0
12.32	6	24.64	1
12.36	6	24.72	0
12.4	6	24.8	0
12.44	9	24.88	1
12.48	7	24.96	1
12.52	6	25.04	1
12.56	8	25.12	5
12.6	5	25.2	2
12.64	3	25.28	1
12.68	8	25.36	0
12.72	8	25.44	7
12.76	7	25.52	3
12.8	7	25.6	3
12.84	4	25.68	1
12.88	7	25.76	2
12.92	12	25.84	2
12.96	4	25.92	2
13	11	26	1
13.04	9	26.08	1
13.08	13	26.16	2
13.12	9	26.24	4
13.16	5	26.32	0
13.2	8	26.4	1
13.24	6	26.48	2
13.28	7	26.56	3
13.32	3	26.64	2
13.36	8	26.72	4
13.4	2	26.8	2
13.44	2	26.88	0
13.48	2	26.96	1
13.52	6	27.04	3
13.56	4	27.12	1
13.6	4	27.2	1
13.64	4	27.28	2
13.68	7	27.36	2
13.72	5	27.44	1
13.76	2	27.52	1
13.8	2	27.6	1
13.84	6	27.68	4
13.88	5	27.76	2
13.92	9	27.84	4
13.96	6	27.92	0
14	7	28	1
14.04	6	28.08	1
14.08	8	28.16	1
14.12	3	28.24	1
14.16	5	28.32	0
14.2	5	28.4	0
14.24	5	28.48	3
14.28	3	28.56	3
14.32	5	28.64	2
14.36	7	28.72	0
14.4	5	28.8	1
14.44	4	28.88	0
14.48	8	28.96	1
14.52	7	29.04	2
14.56	7	29.12	0
14.6	7	29.2	1
14.64	5	29.28	1
14.68	4	29.36	1
14.72	6	29.44	1
14.76	5	29.52	3
14.8	5	29.6	1
14.84	7	29.68	2
14.88	5	29.76	1
14.92	4	29.84	1
14.96	5	29.92	1
15	6	30	1
15.04	5	30.08	0
15.08	5	30.16	0
15.12	7	30.24	0
15.16	4	30.32	2
15.2	5	30.4	0
15.24	1	30.48	0
15.28	5	30.56	0
15.32	4	30.64	1
15.36	2	30.72	1
15.4	2	30.8	0
15.44	5	30.88	3
15.48	5	30.96	2
15.52	5	31.04	2
15.56	7	31.12	0
15.6	6	31.2	3
15.64	4	31.28	0
15.68	4	31.36	1
15.72	8	31.44	1
15.76	6	31.52	1
15.8	3	31.6	0
15.84	2	31.68	3
15.88	5	31.76	0
15.92	1	31.84	2
15.96	3	31.92	1
16	1	32	1
16.04	6	32.08	1
16.08	6	32.16	1
16.12	3	32.24	0
16.16	3	32.32	1
16.2	4	32.4	1
16.24	2	32.48	3
16.28	5	32.56	1
16.32	2	32.64	0
16.36	6	32.72	4
16.4	5	32.8	2
16.44	4	32.88	2
16.48	6	32.96	0
16.52	6	33.04	2
16.56	3	33.12	2
16.6	3	33.2	2
16.64	4	33.28	1
16.68	4	33.36	1
16.72	7	33.44	0
16.76	5	33.52	2
16.8	2	33.6	1
16.84	6	33.68	2
16.88	7	33.76	0
16.92	5	33.84	2
16.96	4	33.92	1
17	6	34	2
17.04	10	34.08	0
17.08	1	34.16	0
17.12	4	34.24	4
17.16	1	34.32	0
17.2	2	34.4	1
17.24	1	34.48	0
17.28	1	34.56	4
17.32	3	34.64	1
17.36	6	34.72	4
17.4	3	34.8	1
17.44	1	34.88	5
17.48	5	34.96	1
17.52	1	35.04	1
17.56	5	35.12	2
17.6	1	35.2	2
17.64	3	35.28	0
17.68	5	35.36	2
17.72	3	35.44	0
17.76	2	35.52	1
17.8	3	35.6	5
17.84	6	35.68	1
17.88	3	35.76	0
17.92	2	35.84	0
17.96	3	35.92	3
18	5	36	2
18.04	2	36.08	2
18.08	1	36.16	1
18.12	2	36.24	0
18.16	3	36.32	0
18.2	3	36.4	0
18.24	6	36.48	0
18.28	0	36.56	1
18.32	2	36.64	1
18.36	3	36.72	1
18.4	2	36.8	0
18.44	3	36.88	1
18.48	4	36.96	1
18.52	2	37.04	0
18.56	4	37.12	1
18.6	1	37.2	1
18.64	2	37.28	0
18.68	2	37.36	1
18.72	3	37.44	4
18.76	1	37.52	1
18.8	4	37.6	1
18.84	2	37.68	0
18.88	1	37.76	0
18.92	3	37.84	1
18.96	3	37.92	1
19	3	38	0
19.04	1	38.08	1
19.08	3	38.16	1
19.12	4	38.24	1
19.16	3	38.32	0
19.2	3	38.4	2
19.24	2	38.48	2
19.28	5	38.56	0
19.32	2	38.64	0
19.36	3	38.72	1
19.4	1	38.8	2
19.44	6	38.88	2
19.48	3	38.96	1
19.52	2	39.04	0
19.56	7	39.12	1
19.6	4	39.2	1
19.64	5	39.28	0
19.68	0	39.36	2
19.72	3	39.44	3
19.76	5	39.52	1
19.8	3	39.6	0
19.84	0	39.68	1
19.88	3	39.76	3
19.92	2	39.84	1
19.96	8	39.92	0
20	5	40	1
20.04	1	40.08	0
20.08	3	40.16	3
20.12	5	40.24	0
20.16	4	40.32	1
20.2	4	40.4	1
20.24	3	40.48	2
20.28	1	40.56	1
20.32	3	40.64	1
20.36	2	40.72	1
20.4	1	40.8	3
20.44	3	40.88	0
20.48	2	40.96	2
20.52	3	41.04	1
20.56	3	41.12	0
20.6	2	41.2	1
20.64	5	41.28	2
20.68	4	41.36	0
20.72	2	41.44	2
20.76	3	41.52	4
20.8	2	41.6	4
20.84	1	41.68	0
20.88	1	41.76	2
20.92	5	41.84	1
20.96	2	41.92	4
21	2	42	3
21.04	2	42.08	1
21.08	2	42.16	2
21.12	3	42.24	0
21.16	6	42.32	0
21.2	3	42.4	2
21.24	4	42.48	2
21.28	5	42.56	2
21.32	3	42.64	2
21.36	1	42.72	0
21.4	2	42.8	2
21.44	0	42.88	1
21.48	1	42.96	1
21.52	4	43.04	2
21.56	0	43.12	1
21.6	0	43.2	0
21.64	2	43.28	1
21.68	3	43.36	1
21.72	3	43.44	2
21.76	5	43.52	2
21.8	1	43.6	0
21.84	1	43.68	1
21.88	2	43.76	2
21.92	3	43.84	1
21.96	1	43.92	1
22	3	44	0
22.04	1	44.08	1
22.08	1	44.16	1
22.12	5	44.24	0
22.16	1	44.32	1
22.2	2	44.4	0
22.24	3	44.48	2
22.28	1	44.56	1
22.32	6	44.64	2
22.36	3	44.72	1
22.4	3	44.8	2
22.44	3	44.88	0
22.48	1	44.96	2
22.52	7	45.04	1
22.56	1	45.12	0
22.6	2	45.2	1
22.64	1	45.28	0
22.68	3	45.36	1
22.72	3	45.44	1
22.76	1	45.52	0
22.8	2	45.6	0
22.84	6	45.68	0
22.88	3	45.76	2
22.92	1	45.84	0
22.96	1	45.92	0
23	1	46	0
23.04	4	46.08	0
23.08	2	46.16	0
23.12	2	46.24	1
23.16	5	46.32	4
23.2	1	46.4	1
23.24	5	46.48	1
23.28	3	46.56	1
23.32	3	46.64	0
23.36	3	46.72	3
23.4	2	46.8	0
23.44	1	46.88	1
23.48	3	46.96	1
23.52	3	47.04	0
23.56	0	47.12	1
23.6	3	47.2	0
23.64	2	47.28	1
23.68	5	47.36	1
23.72	1	47.44	0
23.76	2	47.52	2
23.8	2	47.6	0
23.84	1	47.68	0
23.88	0	47.76	0
23.92	1	47.84	2
23.96	2	47.92	0
24	1	48	1
24.04	0	48.08	0
24.08	3	48.16	0
24.12	4	48.24	0
24.16	2	48.32	2
24.2	1	48.4	0
24.24	3	48.48	1
24.28	2	48.56	0
24.32	4	48.64	0
24.36	3	48.72	0
24.4	2	48.8	0
24.44	0	48.88	2
24.48	4	48.96	0
24.52	2	49.04	1
24.56	3	49.12	0
24.6	7	49.2	0
24.64	5	49.28	3
24.68	3	49.36	2
24.72	1	49.44	0
24.76	2	49.52	0
24.8	1	49.6	1
24.84	0	49.68	1
24.88	2	49.76	2
24.92	2	49.84	0
24.96	1	49.92	0
25	5	50	0
25.04	2	50.08	0
25.08	0	50.16	2
25.12	1	50.24	3
25.16	3	50.32	2
25.2	3	50.4	1
25.24	4	50.48	0
25.28	3	50.56	0
25.32	0	50.64	1
25.36	0	50.72	0
25.4	3	50.8	1
25.44	2	50.88	1
25.48	1	50.96	1
25.52	1	51.04	1
25.56	5	51.12	3
25.6	3	51.2	1
25.64	5	51.28	1
25.68	1	51.36	1
25.72	2	51.44	1
25.76	2	51.52	4
25.8	4	51.6	0
25.84	1	51.68	1
25.88	2	51.76	4
25.92	3	51.84	0
25.96	4	51.92	2
26	4	52	0
26.04	4	52.08	0
26.08	1	52.16	0
26.12	4	52.24	1
26.16	1	52.32	3
26.2	1	52.4	2
26.24	1	52.48	2
26.28	2	52.56	1
26.32	1	52.64	0
26.36	1	52.72	0
26.4	3	52.8	2
26.44	2	52.88	2
26.48	5	52.96	1
26.52	3	53.04	2
26.56	2	53.12	2
26.6	2	53.2	2
26.64	2	53.28	1
26.68	1	53.36	1
26.72	2	53.44	0
26.76	1	53.52	2
26.8	3	53.6	2
26.84	5	53.68	1
26.88	1	53.76	1
26.92	0	53.84	1
26.96	1	53.92	2
27	2	54	0
27.04	4	54.08	2
27.08	1	54.16	1
27.12	1	54.24	2
27.16	2	54.32	2
27.2	2	54.4	0
27.24	3	54.48	0
27.28	1	54.56	3
27.32	4	54.64	1
27.36	1	54.72	0
27.4	2	54.8	1
27.44	3	54.88	1
27.48	0	54.96	1
27.52	3	55.04	1
27.56	1	55.12	2
27.6	0	55.2	5
27.64	1	55.28	3
27.68	4	55.36	2
27.72	3	55.44	1
27.76	3	55.52	2
27.8	2	55.6	1
27.84	1	55.68	1
27.88	2	55.76	1
27.92	1	55.84	0
27.96	2	55.92	0
28	1	56	2
28.04	2	56.08	1
28.08	0	56.16	2
28.12	1	56.24	2
28.16	4	56.32	0
28.2	3	56.4	1
28.24	2	56.48	2
28.28	1	56.56	1
28.32	4	56.64	2
28.36	0	56.72	3
28.4	3	56.8	0
28.44	4	56.88	1
28.48	2	56.96	1
28.52	2	57.04	0
28.56	2	57.12	2
28.6	0	57.2	0
28.64	2	57.28	1
28.68	4	57.36	0
28.72	3	57.44	0
28.76	3	57.52	0
28.8	0	57.6	2
28.84	4	57.68	0
28.88	2	57.76	2
28.92	1	57.84	1
28.96	0	57.92	1
29	1	58	0
29.04	0	58.08	0
29.08	6	58.16	1
29.12	2	58.24	0
29.16	2	58.32	0
29.2	3	58.4	1
29.24	3	58.48	0
29.28	2	58.56	0
29.32	3	58.64	0
29.36	2	58.72	1
29.4	1	58.8	0
29.44	0	58.88	1
29.48	2	58.96	1
29.52	4	59.04	0
29.56	1	59.12	0
29.6	2	59.2	1
29.64	4	59.28	1
29.68	4	59.36	0
29.72	0	59.44	0
29.76	1	59.52	2
29.8	3	59.6	0
29.84	1	59.68	1
29.88	1	59.76	3
29.92	0	59.84	0
29.96	1	59.92	0
30	0	60	0
30.04	3	60.08	0
30.08	3	60.16	0
30.12	3	60.24	1
30.16	1	60.32	2
30.2	3	60.4	1
30.24	4	60.48	0
30.28	2	60.56	2
30.32	1	60.64	0
30.36	0	60.72	0
30.4	0	60.8	0
30.44	3	60.88	0
30.48	2	60.96	0
30.52	2	61.04	2
30.56	3	61.12	0
30.6	2	61.2	1
30.64	1	61.28	0
30.68	2	61.36	1
30.72	2	61.44	2
30.76	2	61.52	1
30.8	2	61.6	1
30.84	7	61.68	0
30.88	4	61.76	1
30.92	3	61.84	0
30.96	3	61.92	2
31	0	62	1
31.04	3	62.08	1
31.08	2	62.16	1
31.12	1	62.24	1
31.16	2	62.32	0
31.2	3	62.4	0
31.24	1	62.48	2
31.28	0	62.56	1
31.32	5	62.64	1
31.36	4	62.72	1
31.4	0	62.8	0
31.44	2	62.88	0
31.48	4	62.96	0
31.52	1	63.04	0
31.56	2	63.12	1
31.6	1	63.2	1
31.64	7	63.28	0
31.68	2	63.36	1
31.72	1	63.44	1
31.76	4	63.52	0
31.8	2	63.6	1
31.84	1	63.68	3
31.88	4	63.76	0
31.92	5	63.84	1
31.96	1	63.92	0
32	2	64	0
32.04	1	64.08	1
32.08	1	64.16	0
32.12	1	64.24	1
32.16	3	64.32	1
32.2	4	64.4	0
32.24	2	64.48	2
32.28	2	64.56	0
32.32	0	64.64	0
32.36	0	64.72	0
32.4	3	64.8	2
32.44	1	64.88	2
32.48	1	64.96	0
32.52	2	65.04	1
32.56	0	65.12	0
32.6	0	65.2	0
32.64	3	65.28	0
32.68	2	65.36	0
32.72	2	65.44	0
32.76	3	65.52	0
32.8	3	65.6	1
32.84	2	65.68	0
32.88	3	65.76	2
32.92	4	65.84	0
32.96	2	65.92	1
33	1	66	2
33.04	2	66.08	0
33.08	2	66.16	0
33.12	0	66.24	0
33.16	1	66.32	0
33.2	1	66.4	0
33.24	2	66.48	0
33.28	1	66.56	0
33.32	3	66.64	2
33.36	0	66.72	0
33.4	2	66.8	2
33.44	2	66.88	0
33.48	2	66.96	4
33.52	0	67.04	1
33.56	3	67.12	1
33.6	2	67.2	0
33.64	2	67.28	0
33.68	0	67.36	0
33.72	2	67.44	2
33.76	9	67.52	0
33.8	4	67.6	0
33.84	3	67.68	1
33.88	3	67.76	0
33.92	4	67.84	0
33.96	1	67.92	0
34	1	68	2
34.04	3	68.08	0
34.08	3	68.16	0
34.12	2	68.24	1
34.16	2	68.32	2
34.2	0	68.4	1
34.24	0	68.48	0
34.28	2	68.56	1
34.32	2	68.64	0
34.36	3	68.72	1
34.4	1	68.8	1
34.44	1	68.88	0
34.48	1	68.96	1
34.52	3	69.04	1
34.56	1	69.12	0
34.6	3	69.2	0
34.64	6	69.28	1
34.68	1	69.36	2
34.72	1	69.44	0
34.76	3	69.52	2
34.8	1	69.6	1
34.84	2	69.68	0
34.88	4	69.76	2
34.92	1	69.84	1
34.96	4	69.92	0
35	3	70	0
35.04	1	70.08	0
35.08	1	70.16	1
35.12	3	70.24	1
35.16	3	70.32	3
35.2	0	70.4	0
35.24	1	70.48	2
35.28	2	70.56	0
35.32	4	70.64	0
35.36	2	70.72	0
35.4	1	70.8	4
35.44	1	70.88	2
35.48	1	70.96	3
35.52	1	71.04	1
35.56	4	71.12	1
35.6	0	71.2	1
35.64	5	71.28	1
35.68	3	71.36	4
35.72	1	71.44	1
35.76	4	71.52	0
35.8	3	71.6	0
35.84	0	71.68	0
35.88	8	71.76	1
35.92	1	71.84	1
35.96	1	71.92	1
36	0	72	0
36.04	2	72.08	1
36.08	2	72.16	1
36.12	3	72.24	4
36.16	2	72.32	0
36.2	1	72.4	0
36.24	5	72.48	1
36.28	1	72.56	0
36.32	3	72.64	1
36.36	1	72.72	1
36.4	3	72.8	3
36.44	1	72.88	0
36.48	1	72.96	2
36.52	2	73.04	0
36.56	3	73.12	1
36.6	1	73.2	0
36.64	2	73.28	1
36.68	4	73.36	0
36.72	2	73.44	3
36.76	1	73.52	0
36.8	2	73.6	4
36.84	2	73.68	1
36.88	2	73.76	2
36.92	1	73.84	0
36.96	4	73.92	1
37	3	74	1
37.04	2	74.08	2
37.08	5	74.16	1
37.12	1	74.24	1
37.16	1	74.32	2
37.2	3	74.4	1
37.24	2	74.48	1
37.28	1	74.56	1
37.32	0	74.64	2
37.36	0	74.72	2
37.4	0	74.8	0
37.44	1	74.88	0
37.48	2	74.96	2
37.52	1	75.04	1
37.56	1	75.12	0
37.6	2	75.2	0
37.64	0	75.28	1
37.68	2	75.36	1
37.72	0	75.44	2
37.76	2	75.52	1
37.8	1	75.6	1
37.84	6	75.68	2
37.88	4	75.76	0
37.92	2	75.84	1
37.96	1	75.92	0
38	2	76	0
38.04	1	76.08	1
38.08	1	76.16	0
38.12	3	76.24	1
38.16	2	76.32	0
38.2	1	76.4	1
38.24	3	76.48	1
38.28	2	76.56	0
38.32	2	76.64	1
38.36	2	76.72	0
38.4	3	76.8	1
38.44	1	76.88	0
38.48	1	76.96	3
38.52	2	77.04	3
38.56	0	77.12	0
38.6	2	77.2	0
38.64	5	77.28	0
38.68	2	77.36	1
38.72	2	77.44	0
38.76	2	77.52	2
38.8	1	77.6	1
38.84	1	77.68	3
38.88	4	77.76	0
38.92	3	77.84	0
38.96	1	77.92	0
39	1	78	0
39.04	4	78.08	0
39.08	2	78.16	0
39.12	1	78.24	1
39.16	4	78.32	1
39.2	0	78.4	1
39.24	3	78.48	0
39.28	1	78.56	2
39.32	1	78.64	0
39.36	1	78.72	1
39.4	2	78.8	2
39.44	1	78.88	1
39.48	2	78.96	1
39.52	0	79.04	1
39.56	4	79.12	0
39.6	0	79.2	0
39.64	2	79.28	1
39.68	1	79.36	0
39.72	1	79.44	1
39.76	3	79.52	0
39.8	1	79.6	2
39.84	1	79.68	2
39.88	2	79.76	1
39.92	1	79.84	2
39.96	3	79.92	2
