# Supplementary material for: High-performance deep-blue phosphorescent organic light-emitting diodes enabled by a platinum(II) emitter
Source: Research Square preprint supplement (doi:10.21203/rs.3.rs-5009247/v1), 2024-09-09
Supplement: Supplementary file 4 [file Fig. 4.xlsx]

## Sheet: Fig. 4b
Electroluminescence (EL) spectrum of 8 wt.% PtQS1-doped deep-blue OLED at 1000 cd/m2
390	0.00222
391	0.00182
392	0.00205
393	0.00316
394	0.00256
395	0.00341
396	0.00395
397	0.0036
398	0.00374
399	0.00287
400	0.00338
401	0.00324
402	0.00325
403	0.00258
404	0.0032
405	0.00282
406	0.00293
407	0.00342
408	0.00313
409	0.00352
410	0.00282
411	0.00283
412	0.00281
413	0.0028
414	0.00272
415	0.00323
416	0.0026
417	0.0032
418	0.00444
419	0.00444
420	0.004
421	0.00489
422	0.00536
423	0.00621
424	0.00718
425	0.00807
426	0.00942
427	0.01058
428	0.01141
429	0.01223
430	0.01318
431	0.01536
432	0.01712
433	0.01814
434	0.01981
435	0.02148
436	0.02326
437	0.02532
438	0.02787
439	0.03008
440	0.03331
441	0.03632
442	0.03988
443	0.04444
444	0.05071
445	0.0578
446	0.06588
447	0.07596
448	0.08774
449	0.1014
450	0.11924
451	0.14065
452	0.16824
453	0.20594
454	0.25502
455	0.31707
456	0.39457
457	0.48687
458	0.59056
459	0.69741
460	0.79957
461	0.88666
462	0.9515
463	0.98701
464	1
465	0.98739
466	0.95668
467	0.90851
468	0.85027
469	0.79104
470	0.73143
471	0.67253
472	0.61368
473	0.56133
474	0.51603
475	0.47423
476	0.43824
477	0.40545
478	0.3777
479	0.35243
480	0.33318
481	0.31584
482	0.30018
483	0.28912
484	0.28134
485	0.27619
486	0.27241
487	0.26988
488	0.26968
489	0.27065
490	0.27084
491	0.27052
492	0.26905
493	0.26592
494	0.26132
495	0.25538
496	0.24817
497	0.23911
498	0.2276
499	0.21717
500	0.20613
501	0.19338
502	0.18108
503	0.16873
504	0.15644
505	0.14518
506	0.13309
507	0.12244
508	0.11323
509	0.10466
510	0.0961
511	0.08943
512	0.08316
513	0.07721
514	0.07189
515	0.06727
516	0.06367
517	0.0605
518	0.05731
519	0.05477
520	0.05243
521	0.05034
522	0.04866
523	0.04717
524	0.04599
525	0.04468
526	0.04323
527	0.042
528	0.04055
529	0.03972
530	0.03857
531	0.03674
532	0.0353
533	0.03348
534	0.03203
535	0.03083
536	0.02908
537	0.02744
538	0.02607
539	0.02436
540	0.02274
541	0.02123
542	0.01966
543	0.01848
544	0.01719
545	0.0158
546	0.01495
547	0.01384
548	0.01263
549	0.01205
550	0.01119
551	0.0103
552	0.00949
553	0.00898
554	0.00837
555	0.0079
556	0.00788
557	0.00724
558	0.00676
559	0.00647
560	0.00621
561	0.00587
562	0.00561
563	0.00535
564	0.00504
565	0.00474
566	0.00467
567	0.00447
568	0.00425
569	0.00402
570	0.00396
571	0.00376
572	0.0036
573	0.00345
574	0.00349
575	0.00328
576	0.00305
577	0.00295
578	0.00277
579	0.00279
580	0.00263
581	0.0023
582	0.00247
583	0.00219
584	0.00212
585	0.00221
586	0.00209
587	0.00208
588	0.00187
589	0.0018
590	0.00189
591	0.00165
592	0.00159
593	0.00147
594	0.00155
595	0.00119
596	0.00137
597	0.00128
598	0.00125
599	0.0013
600	0.00119
601	0.00109
602	0.0011
603	0.000921793
604	0.000914692
605	0.000887554
606	0.000929114
607	0.000924766
608	0.00071889
609	0.000831076
610	0.000693514
611	0.000615457
612	0.000639017
613	0.000574612
614	0.00057197
615	0.00051351
616	0.000607365
617	0.000451362
618	0.000514061
619	0.000519566
620	0.00050085
621	0.000362902
622	0.000331415
623	0.000341104
624	0.000446463
625	0.000288259
626	0.000279176
627	0.000314241
628	0.000280112
629	0.000364058
630	0.000332186
631	0.000353049
632	0.000357067
633	0.000284791
634	0.000262607
635	0.000158953
636	0.00035437
637	0.000417674
638	0.000336204
639	0.000308075
640	0.000323268
641	0.000295249
642	0.000262992
643	0.000292277
644	0.000275543
645	0.000230845
646	0.000388719
647	0.000432757
648	0.000498868
649	0.000399123
650	0.000251928
651	0.000251597
652	0.000342975
653	0.000406664
654	0.000286497
655	0.00018378
656	0.000291066
657	0.000314846
658	0.000299763
659	0.000355801
660	0.000486592
661	0.000397196
662	0.000236845
663	0.000378976
664	0.000210808
665	0.000251047
666	0.000293158
667	0.000256331
668	0.000186972
669	0.00043727
670	0.000351783
671	0.00031336
672	0.00015477
673	0.00015499
674	0.000240918
675	0.000173321
676	0.000112329
677	0.000155596
678	0.000133962
679	0.000180091
680	0.000159669
681	9.8677e-05
682	0.00023112
683	7.05481e-05
684	0.000113044
685	4.12081e-05
686	1.00956e-05
687	9.28421e-05
688	0.000111173
689	0.000199138
690	0.000131375
691	8.70071e-05
692	7.93556e-05
693	0.000182238
694	8.22731e-05
695	2.50794e-05
696	0.00011943
697	4.19237e-05
698	0
699	4.52816e-05
700	0.000135118

## Sheet: Fig. 4c
Current density–voltage–luminance curves
voltage	current	brightness
0.1	-3.48721e-06	0.10638
0.3	-6.62752e-07	1.45182
0.5	7.38747e-07	3.10213
0.7	1.98947e-06	-1.67871
0.9	3.36661e-06	0.39473
1.1	5.00242e-06	0.39889
1.3	6.92288e-06	-2.48309
1.5	8.99904e-06	3.32425
1.7	1.085e-05	1.39418
1.9	1.2349e-05	-1.12134
2.1	1.40593e-05	0.94032
2.3	1.58345e-05	-1.79453
2.5	3.82269e-05	-0.68384
2.7	0.00195	-0.32641
2.9	0.01981	6.70105
3.1	0.06598	19.1773
3.3	0.14009	39.5056
3.5	0.24537	75.361
3.7	0.38837	113.656
3.9	0.5745	162.579
4.1	0.80906	229.899
4.3	1.09706	311.875
4.5	1.44355	411.815
4.7	1.85316	513.428
4.9	2.32929	642.172
5.1	2.8752	785.405
5.3	3.49208	947.602
5.5	4.18152	1120.97
5.7	4.94597	1313.37
5.9	5.78706	1525.75
6.1	6.70891	1753.07
6.3	7.71337	1991.47
6.5	8.80672	2249.35
6.7	9.99624	2525.16
6.9	11.2925	2809.43
7.1	12.6881	3148.72
7.3	14.1866	3472.87
7.5	15.8041	3825.87
7.7	17.5458	4197.49
7.9	19.4244	4590.61
8.1	21.4513	5014.13
8.3	23.6255	5446.72
8.5	25.967	5909
8.7	28.486	6394.33
8.9	31.1945	6906
9.1	34.1179	7456.29
9.3	37.2442	8016.76
9.5	40.6086	8610.42
9.7	44.2264	9236.47
9.9	48.1127	9888.59
10.1	52.3173	10590.9
10.3	56.8013	11301.7
10.5	61.6212	12054.7
10.7	66.8106	12844.7
10.9	72.402	13666.6
11.1	78.4699	14555.2
11.3	84.9277	15453.8
11.5	91.9003	16395.6
11.7	99.4189	17391.8
11.9	107.757	18396.3
12.1	116.523	19536.9
12.3	125.961	20663.7
12.5	136.494	21885.9
12.7	147.698	23176
12.9	159.55	24442.4
13.1	172.427	25774.2
13.3	186.36	27164.1
13.5	201.461	28604.4
13.7	218.164	30154.7
13.9	235.836	31682.7
14.1	255.01	33264.5
14.3	275.81	34890.2
14.5	298.31	36544.1
14.7	323.218	38278.9
14.9	349.22	39917
15.1	377.22	41533.4
15.3	407.161	43098.3
15.5	439.047	44585
15.7	473.988	46017.7
15.9	509.738	47230.4
16.1	547.291	48248.1
16.3	585.182	48968.8
16.5	614.168	48318.3
16.7	637.564	46354
16.9	657.111	43797.2
17.1	674.12	40962.9

## Sheet: Fig. 4d
External quantum efficiency (EQE) vs. luminance curve
brightness	EQE
0.10638	0
1.45182	0
3.10213	0
-1.67871	0
0.39473	0
0.39889	0
-2.48309	0
3.32425	0
1.39418	0
-1.12134	0
0.94032	0
-1.79453	0
-0.68384	0
-0.32641	0
6.70105	39.0874
19.1773	33.5814
39.5056	32.5826
75.361	35.4857
113.656	33.8127
162.579	32.6968
229.899	32.8314
311.875	32.8458
411.815	32.9611
513.428	32.0108
642.172	31.8535
785.405	31.5614
947.602	31.3525
1120.97	30.9734
1313.37	30.6808
1525.75	30.4618
1753.07	30.191
1991.47	29.8305
2249.35	29.5103
2525.16	29.1866
2809.43	28.7448
3148.72	28.6727
3472.87	28.2841
3825.87	27.9699
4197.49	27.6405
4590.61	27.3057
5014.13	27.0068
5446.72	26.6369
5909	26.2919
6394.33	25.9355
6906	25.5787
7456.29	25.2506
8016.76	24.8697
8610.42	24.4983
9236.47	24.1298
9888.59	23.7468
10590.9	23.3894
11301.7	22.9888
12054.7	22.6025
12844.7	22.2131
13666.6	21.8092
14555.2	21.4311
15453.8	21.024
16395.6	20.613
17391.8	20.2119
18396.3	19.725
19536.9	19.3719
20663.7	18.954
21885.9	18.5259
23176	18.1299
24442.4	17.7002
25774.2	17.2707
27164.1	16.8412
28604.4	16.4049
30154.7	15.97
31682.7	15.5218
33264.5	15.0714
34890.2	14.6159
36544.1	14.154
38278.9	13.6834
39917	13.2066
41533.4	12.7213
43098.3	12.2299
44585	11.733
46017.7	11.2173
47230.4	10.7055
48248.1	10.1857
48968.8	9.66851
48318.3	9.0898
46354	8.40028
43797.2	7.70085
40962.9	7.02075

## Sheet: Fig. 4e
Current efficiency (CE) vs. luminance curve
brightness	CE
0.10638	-3050.71
1.45182	-219059
3.10213	419917
-1.67871	-84379.9
0.39473	11724.8
0.39889	7973.91
-2.48309	-35867.9
3.32425	36940
1.39418	12849.6
-1.12134	-9080.42
0.94032	6688.27
-1.79453	-11333
-0.68384	-1788.88
-0.32641	-16.7325
6.70105	33.8303
19.1773	29.0648
39.5056	28.2004
75.361	30.713
113.656	29.2651
162.579	28.2993
229.899	28.4157
311.875	28.4282
411.815	28.528
513.428	27.7055
642.172	27.5694
785.405	27.3165
947.602	27.1357
1120.97	26.8076
1313.37	26.5544
1525.75	26.3648
1753.07	26.1305
1991.47	25.8185
2249.35	25.5413
2525.16	25.2611
2809.43	24.8788
3148.72	24.8163
3472.87	24.48
3825.87	24.2081
4197.49	23.923
4590.61	23.6332
5014.13	23.3745
5446.72	23.0544
5909	22.7558
6394.33	22.4473
6906	22.1385
7456.29	21.8545
8016.76	21.5249
8610.42	21.2034
9236.47	20.8845
9888.59	20.5529
10590.9	20.2436
11301.7	19.8969
12054.7	19.5625
12844.7	19.2255
13666.6	18.876
14555.2	18.5487
15453.8	18.1964
16395.6	17.8406
17391.8	17.4935
18396.3	17.0721
19536.9	16.7665
20663.7	16.4048
21885.9	16.0343
23176	15.6915
24442.4	15.3196
25774.2	14.9479
27164.1	14.5762
28604.4	14.1985
30154.7	13.8221
31682.7	13.4342
33264.5	13.0444
34890.2	12.6501
36544.1	12.2504
38278.9	11.8431
39917	11.4303
41533.4	11.0104
43098.3	10.5851
44585	10.155
46017.7	9.70863
47230.4	9.26563
48248.1	8.8158
48968.8	8.36814
48318.3	7.86727
46354	7.27049
43797.2	6.66512
40962.9	6.07649
