# Supplementary material for: High-performance deep-blue phosphorescent organic light-emitting diodes enabled by a platinum(II) emitter
Source: Research Square preprint supplement (doi:10.21203/rs.3.rs-5009247/v1), 2024-09-09
Supplement: Supplementary file 7 [file Fig. 5.xlsx]

## Sheet: Fig. 5a
Electroluminescence (EL) spectra of 8 wt.% PtQS1 and 8 wt.% PtON-TBBI doped-OLEDs at 1000 cd/m2
PtQS1		PtON-TBBI
380	6.83838e-05	380	0.000103084
381	6.83838e-05	381	0.000103084
382	7.9858e-05	382	0.000337206
383	0.000299335	383	0.000165089
384	2.65138e-05	384	0.000165089
385	2.65138e-05	385	0.000100044
386	0.00019359	386	8.35028e-05
387	0.000362681	387	2.22776e-05
388	0.000202223	388	6.09768e-05
389	0.000202223	389	3.94286e-05
390	0.000202223	390	3.94286e-05
391	5.23812e-05	391	0.000191711
392	0.000193745	392	0.000235912
393	0.000228361	393	8.92277e-05
394	0.000114348	394	5.75287e-05
395	6.40279e-05	395	0
396	2.78919e-05	396	1.34726e-05
397	2.78919e-05	397	1.34726e-05
398	2.78919e-05	398	1.34726e-05
399	2.78919e-05	399	1.34726e-05
400	6.98638e-05	400	1.34726e-05
401	6.98638e-05	401	6.18709e-05
402	6.98638e-05	402	6.66507e-05
403	5.37635e-05	403	3.15494e-05
404	0.000109412	404	3.15494e-05
405	0.000120669	405	2.20887e-05
406	0.000106337	406	2.20887e-05
407	1.99122e-05	407	2.20887e-05
408	1.99122e-05	408	7.32184e-05
409	1.99122e-05	409	1.33723e-05
410	1.99122e-05	410	1.33723e-05
411	3.21797e-05	411	1.33723e-05
412	3.21797e-05	412	1.33723e-05
413	3.21797e-05	413	1.33723e-05
414	3.0853e-05	414	1.33723e-05
415	7.87543e-05	415	1.33723e-05
416	6.99368e-05	416	1.33723e-05
417	0.000136315	417	1.33723e-05
418	3.47862e-05	418	1.33723e-05
419	3.47862e-05	419	1.33723e-05
420	3.47862e-05	420	1.33723e-05
421	3.47862e-05	421	1.33723e-05
422	3.47862e-05	422	1.33723e-05
423	3.47862e-05	423	1.33723e-05
424	1.57104e-05	424	2.83291e-05
425	0.000140047	425	2.83291e-05
426	0.000140047	426	1.89403e-05
427	0.000140047	427	0.000297694
428	5.91956e-05	428	0.000447939
429	0.00021206	429	0.000762728
430	0.000243346	430	0.000773205
431	0.000418878	431	0.00107
432	0.000504931	432	0.00179
433	0.000474864	433	0.00218
434	0.00061154	434	0.00259
435	0.000716473	435	0.00317
436	0.000906697	436	0.00409
437	0.0012	437	0.00528
438	0.00146	438	0.0067
439	0.00167	439	0.00861
440	0.00226	440	0.01129
441	0.0027	441	0.0146
442	0.00336	442	0.01935
443	0.00407	443	0.02608
444	0.00543	444	0.03552
445	0.00744	445	0.04968
446	0.00955	446	0.06877
447	0.01264	447	0.09549
448	0.01745	448	0.13521
449	0.02395	449	0.18945
450	0.03228	450	0.25632
451	0.04377	451	0.34115
452	0.06027	452	0.44101
453	0.08444	453	0.55434
454	0.11843	454	0.66863
455	0.16581	455	0.77612
456	0.23093	456	0.86963
457	0.31806	457	0.94221
458	0.42698	458	0.98617
459	0.54812	459	1
460	0.67469	460	0.98936
461	0.7979	461	0.95398
462	0.90134	462	0.89799
463	0.96827	463	0.83322
464	1	464	0.76577
465	0.99285	465	0.69403
466	0.9523	466	0.61981
467	0.88726	467	0.54759
468	0.80887	468	0.4854
469	0.72279	469	0.42867
470	0.63648	470	0.37799
471	0.55167	471	0.33303
472	0.47555	472	0.29288
473	0.40626	473	0.25847
474	0.34893	474	0.23028
475	0.29991	475	0.20551
476	0.25723	476	0.18341
477	0.22333	477	0.16669
478	0.19358	478	0.15167
479	0.16891	479	0.13882
480	0.14808	480	0.12809
481	0.13086	481	0.1198
482	0.1168	482	0.11262
483	0.10584	483	0.10725
484	0.0966	484	0.10195
485	0.0886	485	0.09707
486	0.08291	486	0.09284
487	0.07847	487	0.08867
488	0.07466	488	0.08499
489	0.07158	489	0.08124
490	0.0691	490	0.07702
491	0.06647	491	0.0733
492	0.06401	492	0.06925
493	0.06151	493	0.0653
494	0.05893	494	0.06096
495	0.05593	495	0.0572
496	0.05308	496	0.05329
497	0.04962	497	0.04956
498	0.0463	498	0.04585
499	0.04303	499	0.04225
500	0.03981	500	0.03905
501	0.03667	501	0.03598
502	0.03326	502	0.03308
503	0.03019	503	0.03047
504	0.02758	504	0.02846
505	0.02481	505	0.02606
506	0.02236	506	0.02393
507	0.02034	507	0.02215
508	0.01835	508	0.02059
509	0.01639	509	0.01901
510	0.01484	510	0.01753
511	0.01358	511	0.01645
512	0.01215	512	0.01534
513	0.01106	513	0.01455
514	0.01004	514	0.01365
515	0.00924	515	0.01294
516	0.00848	516	0.01237
517	0.00802	517	0.01175
518	0.00739	518	0.01099
519	0.00683	519	0.01058
520	0.0064	520	0.01011
521	0.00605	521	0.00954
522	0.00573	522	0.00903
523	0.00543	523	0.00877
524	0.00521	524	0.00844
525	0.00504	525	0.00814
526	0.00468	526	0.0076
527	0.00438	527	0.00719
528	0.00425	528	0.00696
529	0.00403	529	0.0066
530	0.00385	530	0.00606
531	0.0037	531	0.00582
532	0.0035	532	0.00564
533	0.00323	533	0.00523
534	0.0031	534	0.00488
535	0.003	535	0.0047
536	0.00277	536	0.0045
537	0.00246	537	0.00411
538	0.00236	538	0.00375
539	0.00224	539	0.00357
540	0.00214	540	0.00331
541	0.00195	541	0.00321
542	0.00172	542	0.00303
543	0.00165	543	0.00276
544	0.00154	544	0.00254
545	0.00145	545	0.00254
546	0.00138	546	0.00241
547	0.00129	547	0.00224
548	0.00117	548	0.00199
549	0.00111	549	0.00177
550	0.000915145	550	0.00176
551	0.000861372	551	0.00178
552	0.00086195	552	0.00172
553	0.000803553	553	0.00156
554	0.000744159	554	0.00143
555	0.000704279	555	0.00134
556	0.000673081	556	0.00125
557	0.000595308	557	0.0012
558	0.000653739	558	0.00112
559	0.000518377	559	0.00117
560	0.000477894	560	0.0012
561	0.000424489	561	0.00106
562	0.000441836	562	0.000882323
563	0.000432958	563	0.000865084
564	0.000405375	564	0.000814475
565	0.000401723	565	0.000837699
566	0.00034006	566	0.000823479
567	0.000236886	567	0.000794858
568	0.00026181	568	0.000740296
569	0.000388577	569	0.000721433
570	0.000333	570	0.000712862
571	0.000235076	571	0.0007263
572	0.000255244	572	0.000614132
573	0.000151755	573	0.000495479
574	0.000245018	574	0.000560074
575	0.000252206	575	0.000571345
576	0.000224614	576	0.000522733
577	0.000216714	577	0.000464248
578	0.000230463	578	0.000422718
579	0.000195403	579	0.000423433
580	0.000202338	580	0.00037643
581	0.000167662	581	0.000371009
582	0.000229051	582	0.000389329
583	0.000104351	583	0.000318662
584	0.000147054	584	0.000278697
585	0.000119042	585	0.000293867
586	3.31138e-05	586	0.000261272
587	8.30394e-05	587	0.000250134
588	0.000111477	588	0.000234899
589	0.000110434	589	0.000226706
590	6.63421e-05	590	0.000225346
591	7.24965e-05	591	0.00028206
592	7.48991e-05	592	0.000289929
593	0.000106601	593	0.00024666
594	6.2253e-05	594	0.000249567
595	8.6246e-05	595	0.000192641
596	8.6246e-05	596	0.000199452
597	3.3443e-05	597	0.000149052
598	0.000102201	598	0.000137418
599	0.000121692	599	0.000155138
600	7.32879e-05	600	0.000118782
601	6.97699e-05	601	0.000132529
602	5.76669e-05	602	0.000150071
603	7.96163e-05	603	5.71582e-05
604	9.76155e-05	604	8.15443e-05
605	6.41866e-05	605	0.000191597
606	7.24227e-05	606	9.7089e-05
607	5.95864e-05	607	6.89705e-05
608	7.8629e-05	608	0.000103753
609	0.000102629	609	0.000155503
610	1.90052e-05	610	0.000123954
611	0	611	0.000102804
612	7.47592e-05	612	5.92003e-05
613	5.30378e-05	613	6.70219e-05
614	4.03328e-05	614	8.72184e-05
615	4.7895e-06	615	5.76982e-05
616	2.75643e-05	616	8.78319e-05
617	5.0018e-05	617	0.000112206
618	4.00037e-06	618	0.000112206
619	2.51811e-05	619	4.83998e-05
620	6.57524e-05	620	7.92263e-05
621	3.30659e-06	621	6.00388e-05
622	9.00707e-05	622	6.00388e-05
623	6.73208e-05	623	7.35231e-05
624	6.73208e-05	624	7.99469e-05
625	5.93422e-05	625	5.22665e-05
626	0.000146551	626	5.22665e-05
627	4.14688e-05	627	5.22665e-05
628	1.74407e-05	628	5.22665e-05
629	1.74407e-05	629	8.26912e-05
630	4.99286e-05	630	6.77973e-05
631	8.22732e-05	631	0.000103263
632	7.00614e-06	632	5.93975e-05
633	7.00614e-06	633	9.60691e-06
634	7.00614e-06	634	3.09066e-05
635	7.00614e-06	635	0.000131523
636	1.6903e-05	636	7.40587e-05
637	4.00528e-05	637	0.00011316
638	4.00528e-05	638	0.000105653
639	6.10573e-05	639	4.05759e-05
640	3.57552e-05	640	0.000170252
641	3.57552e-05	641	0.000234488
642	8.73162e-06	642	3.27792e-05
643	8.73162e-06	643	8.07447e-05
644	7.37165e-05	644	0.000100506
645	7.37165e-05	645	4.10099e-05
646	7.37165e-05	646	6.20891e-05
647	8.63145e-05	647	0.000112912
648	3.42638e-05	648	1.69429e-05
649	9.43349e-06	649	8.37255e-05
650	9.43349e-06	650	5.98942e-05
651	9.43349e-06	651	5.66865e-05
652	9.43349e-06	652	0.000148676
653	1.81259e-05	653	0.000145887
654	8.38362e-05	654	0.000131586
655	7.00558e-05	655	0.000127518
656	3.08484e-05	656	0.000113265
657	3.45828e-05	657	7.60908e-05
658	2.2931e-05	658	0.000136262
659	1.85043e-05	659	0.00017851
660	1.85043e-05	660	0.000146639
661	1.85043e-05	661	3.68607e-05
662	0.000157812	662	5.07196e-05
663	0.000152031	663	0.000176866
664	5.81598e-05	664	0.000137143
665	1.49034e-06	665	0.000161894
666	1.49034e-06	666	0.000129814
667	1.49034e-06	667	0.000109954
668	0.000143745	668	0.00010948
669	2.271e-05	669	7.42436e-05
670	3.60804e-05	670	7.53839e-05
671	0.000127542	671	6.75379e-05
672	8.75142e-05	672	0.000181066
673	6.98405e-05	673	0.000154152
674	6.98405e-05	674	6.32127e-05
675	2.79481e-05	675	0.000128762
676	0.000206107	676	0.000149958
677	0.000118862	677	7.28002e-05
678	0.000118862	678	6.62049e-05
679	0.000118862	679	5.10398e-05
680	3.2197e-05	680	9.72022e-05
681	0.00016873	681	9.05746e-05
682	0.000184988	682	8.02429e-05
683	8.66812e-05	683	0.000214378
684	5.95638e-05	684	0.000115704
685	8.42319e-06	685	5.90985e-05
686	0.000121939	686	0.00014961
687	0.000111112	687	0.000272292
688	3.46106e-05	688	0.000190017
689	0.000104209	689	0.000121816
690	0.000104209	690	0.000134958
691	0.000104209	691	0.000167308
692	0.000188088	692	0.000235583
693	6.09926e-05	693	0.0001966
694	5.30906e-05	694	0.000252648
695	5.30906e-05	695	0.000221856
696	0.000176869	696	8.05029e-05
697	0.000228877	697	5.55318e-06
698	4.60088e-05	698	5.55318e-06
699	0.000210818	699	0.000278344
700	0.000137767	700	0.000116351
701	0.00019584	701	2.02445e-05
702	0.000217209	702	2.02445e-05
703	0.000153659	703	6.64109e-05
704	0.000136265	704	0.000217655
705	0.000136265	705	0.000377384
706	0.000183819	706	0.000360782
707	0.000200392	707	6.31245e-05
708	0.000203357	708	0.000155782
709	6.92236e-05	709	0.000266168
710	0.000133536	710	0.000200794
711	0.000256066	711	0.000217603
712	0.000195324	712	0.000253531
713	0.000195324	713	0.000462718
714	0.000195324	714	0.0003319
715	0.000317138	715	2.85404e-05
716	0.000176989	716	0.000161529
717	0.000176989	717	0.00015885
718	4.16183e-06	718	0.00015885
719	2.34683e-05	719	5.69456e-05
720	7.42737e-05	720	0.000265594
721	2.09228e-05	721	0.000121254
722	4.79567e-05	722	0.000294418
723	0.000182978	723	0.000108067
724	0.00023222	724	0.000421926
725	0.00023222	725	0.000249741
726	0.00023222	726	0.000309276
727	0.000233745	727	0.000204061
728	0.000233745	728	0.000251715
729	0.000233745	729	0.000345524
730	0.000233745	730	0.000207264
731	0.000247396	731	4.26455e-05
732	0.000394445	732	0.0003488
733	0.000236334	733	0.000568002
734	0.00058887	734	0.00039363
735	0.000701611	735	0.000208705
736	0.000323975	736	0.000284288
737	0.000323975	737	0.000526543
738	0.000323975	738	0.000218411
739	0.000207772	739	0.000170917
740	0.000292396	740	0.00032332
741	0.000123108	741	0.000288357
742	0.000123108	742	0.000285881
743	0.000161329	743	0.000282117
744	9.13853e-05	744	0.00051957
745	0.00025235	745	0.000638942
746	0.000187216	746	0.000211554
747	0.000253352	747	7.27247e-05
748	0.000157296	748	0.000467282
749	0.000104793	749	0.00049852
750	0.00031582	750	1.79474e-05
751	0.000397632	751	0.000220548
752	0.000187733	752	0.000448671
753	0.000187733	753	0.000694181
754	0.000187733	754	0.000364675
755	0.000187733	755	0.000318645
756	0.000187733	756	0.000297589
757	2.90206e-05	757	0.000760912
758	0.000667704	758	0.0006427
759	0.000445136	759	0.000701242
760	0.000189708	760	0.000525747
761	0.000412677	761	0.000118323
762	4.2185e-05	762	0.000123994
763	0.000237332	763	0.000246778
764	0.000739556	764	8.61874e-05
765	0.00055922	765	0.000562054
766	0.000174138	766	0.000224483
767	0.000312434	767	0.000470146
768	0.000244759	768	1.42435e-05
769	0.000237736	769	0.000492223
770	0.000237736	770	0.000698674
771	0.000237736	771	0.000525927
772	0.000106155	772	0.000534183
773	0.000106155	773	0.000838372
774	0.000419865	774	0.000620328
775	0.000694929	775	0.00084778
776	0.000694929	776	0.000320584
777	0.000694929	777	0.000402923
778	0.000694929	778	0.00117
779	0.000840324	779	0.000265469
780	0.00183	780	0.000265469

## Sheet: Fig. 5b
Current density–voltage–luminance curves
PtQS1			PtON-TBBI
voltage	current	brightness	voltage	current	brightness
3.24083	0.5	146.35	3.26029	0.5	74.004
3.41899	1	287.85	3.45413	1	146.09
3.63804	2.0004	561.9	3.68826	2.0004	287.62
3.90534	4.0003	1084.4	3.96801	4.0003	559.23
4.08746	6.0003	1582.7	4.15519	6.0003	820.99
4.22965	8.0002	2063.1	4.29964	8.0003	1074
4.348	10.0002	2527	4.41876	10.0002	1320.5
4.49769	13.0003	3197.5	4.56827	13.0003	1679.8
4.66256	17.004	4059.1	4.73164	17.004	2141.6
4.76633	20.0052	4678.4	4.83381	20.0052	2475.3
5.05502	30.0046	6607.8	5.11583	30.0045	3536.2
5.27099	40.0042	8397.3	5.32537	40.0044	4528.5
5.44331	50.0036	10054	5.49203	50.0035	5458.3

## Sheet: Fig. 5c
External quantum efficiency (EQE) vs. luminance curve
PtQS1		PtON-TBBI
brightness	EQE	brightness	EQE
146.77	49.6701	146.09	27.0544
288.55	48.9422	287.62	26.7002
563.06	47.7677	559.23	26.0014
1087.1	46.1842	820.99	25.4661
1588.2	44.9942	1074	24.99
2071	43.9799	1320.5	24.6042
2533.6	43.0974	1679.8	24.0873
3209.1	42.001	2141.6	23.4927
4073.3	40.7327	2475.3	23.0983
4689	39.8703	3536.2	22.0123
6632.5	37.6055	4528.5	21.1335
8414.9	35.7604	5458.3	20.3799
10080	34.2523

## Sheet: Fig. 5d
Blue index (BI) vs. luminance curves
PtQS1		PtON-TBBI
brightness	BI	brightness	BI
146.77	467.545	146.09	278.794
288.55	460.554	287.62	274.924
563.06	450.883	559.23	268.322
1087.1	436.519	820.99	262.62
1588.2	425.435	1074	258.163
2071	415.934	1320.5	253.938
2533.6	408.233	1679.8	248.963
3209.1	397.344	2141.6	242.672
4073.3	385.646	2475.3	238.867
4689	377.803	3536.2	227.521
6632.5	356.353	4528.5	218.533
8414.9	339.111	5458.3	210.73
10080	324.824

## Sheet: Fig. 5e
Wavelength–luminance–FWHM curves of 8 wt.% PtQS1 doped-OLED
brightness	EL	brightness	FWHM
146.35	465	146.35	13.2
287.85	465	287.85	13.2
561.9	464	561.9	13.1
1084.4	464	1084.4	13.1
1582.7	464	1582.7	13.1
2063.1	464	2063.1	13.1
2527	464	2527	13
3197.5	464	3197.5	13
4059.1	464	4059.1	13
4678.4	464	4678.4	13
6607.8	464	6607.8	13
8397.3	464	8397.3	13
10054	464	10054	13

## Sheet: Fig. 5f
Operational lifetimes of deep-blue OLEDs at an initial luminance (L0) of 1000 cd/m2
PtQS1		PtON-TBBI
0	100	0	100
0.0731	99.98	0.0763	99.97
0.1561	99.96	0.1597	99.93
0.2394	99.95	0.2434	99.89
0.3232	99.93	0.3263	99.86
0.4063	99.91	0.4097	99.83
0.4894	99.9	0.4934	99.79
0.5731	99.88	0.5764	99.76
0.6561	99.87	0.6599	99.73
0.7395	99.85	0.7433	99.69
0.8231	99.84	0.8265	99.66
0.9061	99.82	0.9097	99.63
0.9894	99.81	0.9931	99.6
1.0731	99.79	1.0764	99.57
1.1562	99.78	1.1596	99.54
1.2394	99.77	1.2431	99.51
1.3232	99.75	1.3264	99.49
1.4062	99.74	1.4098	99.47
1.4894	99.73	1.4933	99.45
1.5734	99.72	1.5764	99.43
1.656	99.7	1.6598	99.4
1.7393	99.68	1.7433	99.38
1.8231	99.67	1.8265	99.35
1.9061	99.66	1.9097	99.33
1.9895	99.64	1.9935	99.3
2.0732	99.63	2.0764	99.28
2.1562	99.61	2.1598	99.25
2.2394	99.6	2.2431	99.23
2.3232	99.59	2.3263	99.21
2.4061	99.58	2.4098	99.18
2.4895	99.57	2.4933	99.16
2.5731	99.56	2.5763	99.14
2.6559	99.54	2.6597	99.12
2.7395	99.53	2.7434	99.1
2.8233	99.52	2.8264	99.08
2.906	99.51	2.9098	99.06
2.9894	99.5	2.9934	99.04
3.0733	99.48	3.0766	99.02
3.1562	99.47	3.1597	99
3.2395	99.46	3.2432	98.98
3.3276	99.45	3.3261	98.96
3.406	99.43	3.4096	98.94
3.4894	99.43	3.4931	98.91
3.5732	99.42	3.5765	98.89
3.6559	99.41	3.6597	98.87
3.7394	99.4	3.7432	98.85
3.8231	99.39	3.8265	98.83
3.9061	99.39	3.9098	98.81
3.9893	99.38	3.9934	98.79
4.0732	99.37	4.0764	98.76
4.1562	99.35	4.1597	98.74
4.2396	99.34	4.2433	98.72
4.3233	99.33	4.3263	98.7
4.406	99.32	4.4097	98.68
4.4893	99.31	4.493	98.66
4.573	99.3	4.5765	98.64
4.6561	99.29	4.6597	98.61
4.7396	99.28	4.7431	98.59
4.8232	99.27	4.8258	98.57
4.9062	99.26	4.9091	98.55
4.9894	99.25	5.0022	98.52
5.0731	99.23	5.0761	98.5
5.1562	99.22	5.1595	98.48
5.2394	99.2	5.2431	98.45
5.323	99.19	5.3262	98.43
5.4061	99.17	5.4094	98.41
5.4893	99.16	5.493	98.39
5.5731	99.14	5.5763	98.37
5.6561	99.12	5.6597	98.36
5.7396	99.11	5.7431	98.34
5.8233	99.09	5.8262	98.33
5.906	99.08	5.9096	98.32
5.9894	99.06	6.0057	98.3
6.0733	99.05	6.0928	98.29
6.1562	99.04	6.1762	98.27
6.2394	99.02	6.2596	98.26
6.3231	99.01	6.3427	98.25
6.4062	99	6.4261	98.23
6.4895	98.98	6.5302	98.21
6.5731	98.97	6.6096	98.2
6.6561	98.96	6.6932	98.18
6.7394	98.94	6.7761	98.17
6.8232	98.93	6.8593	98.16
6.9061	98.92	6.9431	98.15
6.9893	98.9	7.0261	98.14
7.0733	98.89	7.1094	98.12
7.156	98.88	7.1932	98.11
7.2394	98.86	7.276	98.09
7.3231	98.85	7.3594	98.08
7.406	98.84	7.4431	98.06
7.4895	98.83	7.526	98.05
7.5733	98.82	7.6093	98.03
7.656	98.81	7.6931	98.02
7.7396	98.79	7.7762	98
7.8233	98.78	7.8594	97.98
7.9061	98.77	7.9431	97.96
7.9895	98.76	8.0261	97.95
8.0732	98.75	8.1095	97.94
8.1561	98.74	8.193	97.92
8.2393	98.73	8.2761	97.9
8.3232	98.72	8.3594	97.88
8.4061	98.71	8.443	97.87
8.4895	98.71	8.5262	97.85
8.5734	98.71	8.6092	97.84
8.6561	98.71	8.6931	97.82
8.7394	98.7	8.776	97.81
8.8232	98.69	8.8593	97.79
8.9063	98.69	8.943	97.78
8.9894	98.68	9.0262	97.76
9.0733	98.67	9.1095	97.75
9.156	98.66	9.193	97.74
9.2393	98.65	9.2762	97.72
9.3233	98.64	9.3593	97.71
9.4062	98.63	9.4432	97.69
9.4894	98.61	9.5263	97.68
9.5732	98.59	9.6095	97.66
9.6562	98.59	9.6932	97.65
9.7395	98.57	9.7761	97.63
9.8233	98.56	9.8592	97.62
9.906	98.54	9.9429	97.61
9.9895	98.53	10.026	97.59
10.0733	98.51	10.1093	97.58
10.156	98.5	10.1929	97.56
10.2395	98.49	10.2761	97.55
10.3232	98.47	10.3594	97.54
10.4063	98.46	10.443	97.53
10.4896	98.45	10.5262	97.51
10.5732	98.44	10.6095	97.5
10.6561	98.42	10.6931	97.5
10.7394	98.41	10.7763	97.49
10.8232	98.4	10.8593	97.48
10.9061	98.38	10.9431	97.46
10.9895	98.37	11.0259	97.45
11.0733	98.36	11.1093	97.45
11.156	98.35	11.193	97.44
11.2394	98.34	11.276	97.42
11.3231	98.32	11.3595	97.41
11.4062	98.31	11.4431	97.4
11.4896	98.3	11.5262	97.39
11.5734	98.29	11.6094	97.37
11.6562	98.28	11.6932	97.36
11.7396	98.27	11.776	97.35
11.8233	98.26	11.8594	97.34
11.906	98.25	11.9432	97.33
11.9895	98.25	12.0261	97.31
12.0731	98.25	12.1093	97.32
12.1562	98.24	12.1929	97.31
12.2394	98.23	12.276	97.3
12.3234	98.22	12.3593	97.29
12.4061	98.22	12.4429	97.27
12.4895	98.22	12.5262	97.26
12.5733	98.21	12.6096	97.24
12.6561	98.2	12.6927	97.23
12.7395	98.19	12.7761	97.22
12.8231	98.18	12.8598	97.2
12.9061	98.17	12.9428	97.19
12.9894	98.16	13.0261	97.17
13.0731	98.15	13.1095	97.17
13.156	98.14	13.1927	97.16
13.2394	98.13	13.2761	97.15
13.3234	98.12	13.3597	97.13
13.4062	98.11	13.4588	97.12
13.4895	98.1	13.5429	97.11
13.5732	98.09	13.6265	97.09
13.6563	98.08	13.7095	97.08
13.7397	98.07	13.7929	97.06
13.8232	98.06	13.8762	97.05
13.906	98.05	14.0106	97.03
13.9894	98.04	14.0927	97.02
14.0731	98.03	14.1765	97
14.1563	98.02	14.2594	96.99
14.2395	98.01	14.3428	96.98
14.3234	98	14.4265	96.96
14.4061	97.99	14.5096	96.95
14.4896	97.98	14.5927	96.93
14.5733	97.98	14.6765	96.92
14.6561	97.97	14.7595	96.91
14.7393	97.96	14.8426	96.89
14.8232	97.95	14.9263	96.88
14.9061	97.94	15.0094	96.87
14.9893	97.93	15.0927	96.86
15.0732	97.91	15.1765	96.84
15.1561	97.9	15.2594	96.83
15.2394	97.9	15.3427	96.82
15.3234	97.88	15.4265	96.8
15.4063	97.88	15.5095	96.79
15.4895	97.86	15.5929	96.77
15.573	97.85	15.6766	96.76
15.656	97.84	15.7596	96.75
15.7395	97.83	15.8427	96.74
15.8231	97.82	15.9263	96.72
15.9061	97.81	16.0095	96.71
15.9895	97.8	16.0929	96.7
16.0733	97.78	16.1765	96.68
16.1562	97.78	16.2594	96.67
16.2395	97.76	16.3428	96.66
16.3234	97.75	16.4266	96.65
16.4063	97.74	16.5095	96.63
16.4894	97.73	16.593	96.62
16.5732	97.72	16.6763	96.6
16.6562	97.71	16.7595	96.59
16.7395	97.7	16.8427	96.58
16.8232	97.69	16.9265	96.57
16.9061	97.68	17.0095	96.56
16.9895	97.67	17.0929	96.55
17.0732	97.66	17.1764	96.53
17.1562	97.64	17.2595	96.52
17.2395	97.64	17.3429	96.51
17.3232	97.62	17.4265	96.5
17.4061	97.61	17.5094	96.49
17.4894	97.6	17.5927	96.48
17.5731	97.59	17.6763	96.46
17.656	97.58	17.7594	96.45
17.7393	97.57	17.8428	96.45
17.8234	97.56	17.9265	96.45
17.9061	97.55	18.0095	96.44
17.9894	97.54	18.0927	96.43
18.0733	97.53	18.1764	96.42
18.156	97.52	18.2594	96.42
18.2393	97.51	18.3429	96.4
18.3233	97.5	18.4264	96.39
18.406	97.48	18.5094	96.38
18.4895	97.47	18.5929	96.37
18.573	97.45	18.6762	96.36
18.6561	97.44	18.7593	96.34
18.7395	97.43	18.8426	96.33
18.8231	97.41	18.9265	96.32
18.9063	97.4	19.0093	96.31
18.9895	97.38	19.0928	96.3
19.0732	97.37	19.1764	96.28
19.1563	97.36	19.2594	96.27
19.2395	97.34	19.3428	96.26
19.3232	97.33	19.4265	96.25
19.406	97.31	19.5094	96.24
19.4893	97.3	19.593	96.22
19.5732	97.29	19.6763	96.21
19.656	97.28	19.7592	96.2
19.7395	97.26	19.8429	96.19
19.8234	97.25	19.9264	96.18
19.9061	97.24	20.0095	96.16
19.9895	97.23	20.0929	96.15
20.0732	97.22	20.1766	96.14
20.1562	97.2	20.2595	96.13
20.2395	97.19	20.3429	96.11
20.323	97.18	20.4264	96.1
20.406	97.17	20.5094	96.09
20.4894	97.16	20.593	96.08
20.5732	97.15	20.6764	96.06
20.6562	97.14	20.7594	96.05
20.7393	97.13	20.8428	96.04
20.8232	97.13	20.9264	96.03
20.9058	97.13	21.0093	96.02
20.9893	97.12	21.0929	96.01
21.0732	97.12	21.1765	96
21.1557	97.1	21.2596	95.99
21.2392	97.09	21.3429	95.97
21.3232	97.08	21.4266	95.96
21.406	97.07	21.5096	95.95
21.4892	97.06	21.5928	95.94
21.5732	97.05	21.6764	95.93
21.656	97.03	21.7593	95.92
21.7391	97.02	21.8429	95.9
21.8233	97.01	21.9265	95.9
21.9058	97	22.0096	95.88
21.9892	96.98	22.0928	95.87
22.0731	96.97	22.1766	95.86
22.1558	96.96	22.2595	95.85
22.2391	96.96	22.343	95.83
22.3232	96.94	22.4266	95.82
22.4058	96.93	22.5094	95.81
22.4891	96.92	22.5928	95.79
22.5734	96.91	22.6765	95.78
22.6559	96.89	22.7596	95.77
22.7391	96.88	22.8428	95.75
22.8234	96.87	22.9264	95.74
22.9058	96.86	23.0095	95.73
22.9891	96.85	23.0928	95.71
23.0732	96.84	23.1767	95.69
23.1558	96.83	23.2595	95.68
23.239	96.82	23.3426	95.66
23.3231	96.81	23.4264	95.65
23.4058	96.8	23.5093	95.64
23.4891	96.79	23.5941	95.63
23.5733	96.78	23.6859	95.63
23.6559	96.78	23.7593	95.62
23.7393	96.77	23.8427	95.61
23.8234	96.76	23.9264	95.6
23.9058	96.75	24.0094	95.59
23.9894	96.74	24.0924	95.58
24.0732	96.73	24.1762	95.58
24.1558	96.71	24.2593	95.58
24.2391	96.71	24.3442	95.58
24.3232	96.7	24.4262	95.58
24.4058	96.68	24.5093	95.57
24.4892	96.67	24.6005	95.55
24.5732	96.66	24.6763	95.55
24.656	96.65	24.7593	95.54
24.7392	96.64	24.8426	95.52
24.8233	96.63	24.9263	95.51
24.906	96.62	25.0093	95.49
24.989	96.6	25.0926	95.48
25.0732	96.59	25.1763	95.46
25.1558	96.59	25.2609	95.45
25.239	96.58	25.3426	95.44
25.3232	96.57	25.4263	95.42
25.4058	96.56	25.5093	95.4
25.4893	96.55	25.5926	95.39
25.5733	96.54	25.6764	95.38
25.6559	96.52	25.7592	95.36
25.7393	96.51	25.8426	95.35
25.8233	96.5	25.9264	95.34
25.906	96.48	26.0091	95.32
25.9891	96.47	26.0925	95.31
26.0731	96.45	26.1763	95.29
26.1558	96.44	26.2593	95.28
26.239	96.43	26.3425	95.27
26.3231	96.42	26.4262	95.26
26.4059	96.4	26.5092	95.25
26.4893	96.39	26.5926	95.23
26.5734	96.38	26.6764	95.23
26.6559	96.37	26.7594	95.21
26.7393	96.35	26.8426	95.21
26.8234	96.34	26.9261	95.19
26.906	96.33	27.0093	95.18
26.9893	96.31	27.0925	95.16
27.0731	96.3	27.1761	95.15
27.156	96.29	27.2592	95.14
27.2393	96.28	27.3426	95.13
27.3232	96.26	27.4263	95.12
27.4058	96.26	27.5092	95.1
27.4892	96.24	27.5926	95.09
27.5734	96.23	27.6764	95.08
27.656	96.22	27.7594	95.07
27.7393	96.21	27.8427	95.06
27.8231	96.2	27.9262	95.05
27.9059	96.18	28.0092	95.04
27.9891	96.18	28.0926	95.03
28.0732	96.16	28.1763	95.02
28.1558	96.15	28.2592	95.01
28.2392	96.14	28.3427	95
28.3232	96.13	28.4264	94.99
28.4057	96.12	28.5094	94.98
28.4893	96.11	28.5928	94.97
28.5733	96.09	28.6761	94.96
28.656	96.08	28.7591	94.95
28.739	96.08	28.8426	94.95
28.8232	96.06	28.9262	94.94
28.9059	96.05	29.0094	94.93
28.9891	96.04	29.0927	94.93
29.0731	96.03	29.1763	94.92
29.156	96.02	29.2593	94.91
29.2393	96.02	29.3426	94.9
29.3232	96.01	29.4263	94.89
29.406	96.01	29.5093	94.89
29.4891	96	29.5925	94.87
29.5732	96	29.6761	94.87
29.6559	95.99	29.7593	94.86
29.739	95.97	29.8426	94.84
29.8231	95.96	29.9264	94.84
29.9057	95.95	30.0093	94.83
29.9891	95.94	30.0926	94.82
30.0731	95.93	30.1765	94.82
30.1558	95.93	30.2594	94.8
30.2392	95.92	30.3427	94.79
30.3232	95.91	30.4265	94.78
30.406	95.9	30.5094	94.77
30.4891	95.89	30.5925	94.76
30.5732	95.89	30.6761	94.74
30.656	95.88	30.7593	94.73
30.7392	95.87	30.8427	94.71
30.823	95.86	30.9262	94.7
30.9057	95.85	31.0093	94.68
30.9893	95.84	31.0925	94.67
31.0733	95.83	31.1763	94.66
31.1559	95.82	31.2592	94.64
31.2392	95.81	31.3426	94.63
31.3234	95.8	31.4264	94.61
31.4059	95.79	31.5092	94.6
31.4892	95.78	31.5925	94.59
31.5734	95.77	31.6762	94.57
31.656	95.76	31.7592	94.56
31.7392	95.75	31.8425	94.55
31.8231	95.74	31.9264	94.54
31.9059	95.73	32.0093	94.52
31.9893	95.72	32.0926	94.52
32.0732	95.72	32.1763	94.5
32.1558	95.71	32.2592	94.49
32.2393	95.69	32.3427	94.48
32.3233	95.68	32.4265	94.47
32.406	95.67	32.5091	94.46
32.4893	95.66	32.5925	94.45
32.5733	95.65	32.6764	94.44
32.6559	95.64	32.7593	94.43
32.7391	95.63	32.8426	94.42
32.8232	95.62	32.9263	94.41
32.9058	95.61	33.0092	94.4
32.9891	95.6	33.0925	94.39
33.0734	95.59	33.1765	94.38
33.1558	95.58	33.2592	94.37
33.2392	95.57	33.3427	94.36
33.3232	95.56	33.4262	94.35
33.4061	95.55	33.5093	94.34
33.4891	95.54	33.5925	94.33
33.5733	95.53	33.6762	94.33
33.6559	95.52	33.7593	94.33
33.7392	95.51	33.8428	94.33
33.8233	95.51	33.9265	94.33
33.9059	95.5	34.0093	94.32
33.9894	95.5	34.0927	94.32
34.0734	95.49	34.1764	94.32
34.1559	95.48	34.2592	94.31
34.2393	95.47	34.3428	94.3
34.3233	95.46	34.4263	94.3
34.4058	95.45	34.5091	94.29
34.4891	95.44	34.5935	94.28
34.5732	95.43	34.6763	94.26
34.6557	95.41	34.7594	94.25
34.7391	95.4	34.8426	94.24
34.8231	95.39	34.9265	94.23
34.9058	95.38	35.0095	94.22
34.9893	95.37	35.0928	94.2
35.0733	95.36	35.1761	94.19
35.1559	95.35	35.2591	94.18
35.2394	95.33	35.3426	94.16
35.3234	95.32	35.4264	94.15
35.406	95.31	35.5092	94.14
35.4891	95.3	35.5927	94.13
35.5732	95.29	35.6763	94.11
35.6559	95.28	35.7593	94.1
35.7392	95.27	35.8428	94.09
35.8233	95.26	35.9264	94.08
35.906	95.25	36.0094	94.06
35.9892	95.24	36.0926	94.06
36.0732	95.23	36.1762	94.04
36.1558	95.22	36.2592	94.03
36.2393	95.22	36.3425	94.02
36.3234	95.21	36.4262	94.01
36.406	95.21	36.5092	94
36.4892	95.2	36.5926	93.99
36.5732	95.19	36.6764	93.98
36.6558	95.18	36.7594	93.97
36.7392	95.17	36.8426	93.96
36.8232	95.16	36.9264	93.95
36.9059	95.15	37.0094	93.94
36.9892	95.14	37.0926	93.93
37.0731	95.13	37.1761	93.92
37.156	95.11	37.2592	93.93
37.2391	95.1	37.3426	93.92
37.3235	95.09	37.4264	93.92
37.406	95.08	37.5094	93.91
37.4891	95.07	37.5927	93.9
37.5734	95.06	37.6765	93.9
37.6557	95.04	37.7593	93.9
37.7392	95.03	37.8427	93.9
37.8232	95.02	37.9265	93.89
37.9058	95.01	38.0093	93.88
37.9892	95	38.0925	93.88
38.0735	94.99	38.1763	93.87
38.1559	94.98	38.2592	93.86
38.2392	94.97	38.3427	93.85
38.3237	94.96	38.4263	93.84
38.4057	94.95	38.5092	93.83
38.4893	94.94	38.5927	93.83
38.5733	94.93	38.6763	93.81
38.6557	94.92	38.7592	93.8
38.7391	94.91	38.8426	93.79
38.8232	94.9	38.9264	93.78
38.906	94.89	39.0092	93.78
38.9892	94.89	39.0924	93.77
39.0734	94.89	39.1762	93.76
39.1559	94.89	39.2592	93.75
39.2393	94.89	39.3427	93.74
39.3233	94.88	39.4265	93.73
39.4059	94.87	39.5092	93.72
39.4891	94.87	39.5928	93.71
39.5733	94.86	39.6765	93.71
39.6559	94.85	39.7593	93.7
39.7393	94.84	39.8426	93.7
39.8234	94.83	39.9264	93.69
39.9059	94.83	40.0093	93.68
39.9893	94.83	40.0926	93.67
40.0735	94.82	40.1762	93.67
40.156	94.81	40.2592	93.66
40.2391	94.8	40.3427	93.64
40.3231	94.79	40.4265	93.63
40.4058	94.79	40.5093	93.62
40.4891	94.78	40.6005	93.62
40.5734	94.76	40.6764	93.61
40.6559	94.75	40.7592	93.59
40.7392	94.75	40.8426	93.59
40.8233	94.74	40.9262	93.58
40.9058	94.72	41.0092	93.57
40.9893	94.71	41.0928	93.55
41.0733	94.7	41.1765	93.55
41.1561	94.69	41.2592	93.53
41.2392	94.69	41.3425	93.53
41.3233	94.67	41.4264	93.52
41.4059	94.66	41.5094	93.51
41.4893	94.66	41.5926	93.5
41.5732	94.65	41.6764	93.49
41.656	94.63	41.7591	93.48
41.7393	94.62	41.8425	93.46
41.8233	94.62	41.9263	93.45
41.906	94.61	42.0093	93.44
41.9892	94.59	42.0928	93.43
42.0732	94.59	42.1766	93.42
42.1557	94.57	42.2593	93.41
42.2392	94.57	42.3427	93.4
42.3233	94.56	42.4265	93.4
42.4059	94.55	42.5094	93.39
42.4893	94.54	42.5928	93.38
42.5733	94.53	42.6762	93.36
42.6558	94.52	42.7593	93.35
42.7393	94.51	42.8425	93.35
42.8234	94.5	42.9263	93.34
42.9058	94.5	43.0094	93.33
42.9891	94.49	43.0928	93.31
43.0732	94.48	43.1765	93.3
43.1559	94.47	43.2594	93.3
43.2391	94.46	43.3427	93.29
43.3233	94.45	43.4265	93.28
43.4059	94.44	43.5093	93.27
43.4893	94.43	43.5928	93.25
43.5732	94.42	43.6763	93.24
43.6558	94.41	43.7593	93.23
43.7392	94.4	43.8425	93.22
43.8233	94.39	43.9263	93.2
43.906	94.38	44.0093	93.19
43.9892	94.37	44.0926	93.17
44.0733	94.37	44.1765	93.16
44.1558	94.36	44.2595	93.14
44.2392	94.35	44.3426	93.13
44.3234	94.34	44.4263	93.12
44.4058	94.33	44.5094	93.11
44.4892	94.32	44.5925	93.09
44.5732	94.31	44.6764	93.08
44.6559	94.29	44.7592	93.07
44.7392	94.28	44.8425	93.05
44.8232	94.27	44.9263	93.04
44.906	94.26	45.0092	93.03
44.9891	94.25	45.0927	93.02
45.0733	94.23	45.1765	93.01
45.1559	94.22	45.2594	93
45.2391	94.21	45.3426	92.99
45.3232	94.2	45.4265	92.98
45.4059	94.18	45.5095	92.97
45.4892	94.17	45.5926	92.96
45.5786	94.16	45.6763	92.95
45.6557	94.15	45.7593	92.93
45.7393	94.14	45.8427	92.92
45.8226	94.12	45.9265	92.92
45.9059	94.11	46.0094	92.92
45.9891	94.11	46.0926	92.91
46.0729	94.1	46.1763	92.91
46.1559	94.1	46.2593	92.91
46.2393	94.09	46.3427	92.9
46.3228	94.08	46.4263	92.89
46.406	94.07	46.5093	92.89
46.4893	94.06	46.5926	92.88
46.5729	94.05	46.6766	92.87
46.6561	94.04	46.7593	92.86
46.7393	94.03	46.8427	92.85
46.8227	94.02	46.9265	92.83
46.9057	94.01	47.0093	92.82
46.9892	94	47.0928	92.81
47.0728	93.99	47.1765	92.79
47.1559	93.97	47.2595	92.78
47.2571	93.96	47.3426	92.77
47.3405	93.95	47.4263	92.76
47.424	93.94	47.5093	92.76
47.5072	93.93	47.5926	92.75
47.5906	93.92	47.6763	92.74
47.674	93.91	47.7594	92.72
47.7574	93.9	47.8427	92.71
47.8405	93.9	47.9264	92.7
47.9241	93.89	48.0093	92.69
48.0073	93.88	48.0926	92.68
48.0907	93.87	48.1764	92.67
48.1738	93.86	48.2594	92.66
48.257	93.85	48.3426	92.65
48.3405	93.85	48.4265	92.64
48.4238	93.83	48.5092	92.63
48.5073	93.83	48.5926	92.62
48.5905	93.82	48.6765	92.61
48.6741	93.8	48.7593	92.61
48.7572	93.79	48.8428	92.6
48.8406	93.78	48.9265	92.59
48.9239	93.77	49.0095	92.58
49.0071	93.76	49.0926	92.57
49.0906	93.75	49.1764	92.56
49.1741	93.74	49.2593	92.56
49.2573	93.73	49.3425	92.55
49.3406	93.73	49.4265	92.54
49.4239	93.71	49.5094	92.53
49.5072	93.71	49.5925	92.52
49.5904	93.69	49.6765	92.51
49.674	93.69	49.7593	92.5
49.7571	93.67	49.8426	92.49
49.8405	93.67	49.9264	92.48
49.9239	93.66	50.0093	92.47
50.0072	93.65	50.0927	92.46
50.0906	93.64	50.1766	92.45
50.174	93.63	50.2592	92.44
50.2573	93.62	50.3426	92.42
50.3405	93.61	50.4264	92.42
50.4241	93.61	50.5094	92.41
50.5072	93.6	50.5927	92.4
50.5906	93.59	50.6765	92.4
50.6742	93.58	50.7594	92.39
50.7572	93.57	50.8426	92.37
50.8405	93.56	50.9266	92.36
50.9239	93.55	51.0094	92.35
51.0072	93.54	51.0928	92.33
51.0907	93.53	51.1764	92.32
51.1738	93.52	51.2593	92.31
51.2572	93.52	51.3426	92.29
51.3405	93.51	51.4262	92.28
51.4238	93.5	51.5093	92.27
51.5074	93.49	51.5925	92.26
51.5906	93.48	51.6765	92.24
51.674	93.47	51.7595	92.23
51.7574	93.46	51.8427	92.22
51.8407	93.45	51.9266	92.21
51.9322	93.45	52.0094	92.19
52.007	93.44	52.0927	92.18
52.0906	93.43	52.1766	92.17
52.1738	93.42	52.2594	92.16
52.2572	93.41	52.3428	92.15
52.3405	93.4	52.4264	92.13
52.4306	93.4	52.5092	92.12
52.5073	93.39	52.5926	92.11
52.5907	93.38	52.6766	92.1
52.6739	93.37	52.7593	92.09
52.7575	93.36	52.8428	92.08
52.8406	93.35	52.9265	92.07
52.924	93.34	53.0092	92.05
53.0074	93.33	53.0925	92.04
53.0905	93.33	53.1764	92.03
53.1737	93.32	53.2594	92.02
53.2573	93.31	53.3426	92.01
53.3404	93.3	53.4265	92
53.4238	93.29	53.5093	91.99
53.5072	93.28	53.5927	91.98
53.5905	93.28	53.6765	91.97
53.674	93.27	53.7593	91.96
53.7573	93.26	53.8427	91.95
53.8405	93.25	53.9266	91.94
53.9241	93.25	54.0092	91.93
54.0073	93.24	54.0925	91.92
54.0907	93.23	54.1764	91.91
54.1741	93.22	54.2594	91.9
54.2575	93.22	54.3427	91.89
54.3405	93.21	54.4265	91.88
54.4237	93.2	54.5095	91.87
54.5073	93.19	54.5928	91.87
54.5905	93.18	54.6766	91.87
54.6738	93.17	54.7593	91.87
54.7573	93.17	54.8426	91.86
54.8405	93.16	54.9265	91.85
54.9238	93.15	55.0092	91.84
55.0073	93.14	55.0926	91.83
55.0906	93.13	55.1763	91.82
55.1739	93.12	55.2594	91.82
55.2574	93.11	55.3428	91.81
55.3406	93.1	55.4264	91.8
55.424	93.1	55.5094	91.79
55.5074	93.09	55.5927	91.78
55.5907	93.08	55.6766	91.78
55.6739	93.07	55.7593	91.77
55.7571	93.06	55.8426	91.77
55.8406	93.05	55.9265	91.76
55.9239	93.04	56.0091	91.76
56.0072	93.03	56.0927	91.74
56.0905	93.02	56.1763	91.74
56.174	93.01	56.2593	91.73
56.2573	93	56.3427	91.72
56.3406	92.99	56.4265	91.71
56.4241	92.98	56.5095	91.7
56.5075	92.97	56.5928	91.69
56.5906	92.96	56.6766	91.69
56.674	92.95	56.7593	91.68
56.7573	92.94	56.8427	91.67
56.8405	92.93	56.9266	91.66
56.9239	92.93	57.0093	91.65
57.0073	92.91	57.0926	91.64
57.0905	92.9	57.1765	91.63
57.174	92.9	57.2594	91.62
57.2574	92.89	57.3427	91.62
57.3405	92.88	57.4266	91.61
57.4239	92.87	57.5093	91.6
57.5073	92.86	57.5928	91.59
57.5905	92.85	57.6766	91.58
57.6738	92.84	57.7593	91.57
57.7573	92.83	57.8426	91.56
57.8408	92.82	57.9265	91.55
57.9238	92.81	58.0094	91.54
58.0072	92.8	58.0927	91.53
58.0904	92.8	58.1765	91.53
58.1738	92.79	58.2594	91.51
58.2573	92.78	58.3427	91.5
58.3404	92.77	58.4264	91.5
58.424	92.76	58.5093	91.49
58.5075	92.75	58.5929	91.48
58.5907	92.74	58.6766	91.47
58.6741	92.73	58.7593	91.47
58.7576	92.72	58.8427	91.46
58.8406	92.71	58.9264	91.45
58.9241	92.71	59.0091	91.44
59.0075	92.7	59.0926	91.44
59.0906	92.69	59.1764	91.43
59.1742	92.68	59.2594	91.43
59.2572	92.67	59.3427	91.42
59.3406	92.66	59.4264	91.41
59.424	92.65	59.5095	91.4
59.5075	92.64	59.5928	91.39
59.5905	92.63	59.6766	91.39
59.674	92.63	59.7593	91.38
59.7574	92.62	59.8428	91.37
59.8407	92.61	59.9264	91.36
59.9241	92.6	60.0092	91.34
60.0075	92.59	60.0927	91.33
60.0906	92.58	60.1764	91.32
60.1742	92.57	60.2594	91.31
60.2575	92.56	60.3427	91.3
60.3408	92.56	60.4266	91.3
60.424	92.55	60.5094	91.28
60.5072	92.53	60.5929	91.27
60.5906	92.53	60.6766	91.26
60.6738	92.52	60.7592	91.25
60.7574	92.51	60.8426	91.24
60.8405	92.5	60.9264	91.23
60.924	92.49	61.0094	91.23
61.0075	92.48	61.0928	91.22
61.0908	92.47	61.1765	91.21
61.1741	92.46	61.2593	91.2
61.2576	92.45	61.3427	91.19
61.3406	92.44	61.4264	91.18
61.4241	92.43	61.5094	91.18
61.5076	92.42	61.5928	91.18
61.5906	92.41	61.6764	91.17
61.6741	92.4	61.7592	91.16
61.7573	92.39	61.8425	91.16
61.8407	92.38	61.9265	91.15
61.9239	92.38	62.0094	91.14
62.0073	92.37	62.0927	91.13
62.0906	92.36	62.1765	91.12
62.1738	92.35	62.2594	91.11
62.2573	92.34	62.3427	91.1
62.3408	92.33	62.4266	91.09
62.4242	92.32	62.5094	91.08
62.5073	92.31	62.5928	91.07
62.5908	92.3	62.6764	91.06
62.674	92.29	62.7592	91.05
62.7575	92.28	62.8428	91.04
62.8407	92.28	62.9265	91.03
62.924	92.27	63.0093	91.02
63.0074	92.26	63.0929	91.01
63.0906	92.26	63.1764	91
63.1739	92.25	63.2596	90.99
63.2573	92.25	63.3426	90.98
63.3407	92.23	63.4267	90.97
63.4241	92.23	63.5094	90.96
63.5074	92.22	63.5928	90.95
63.5906	92.21	63.6765	90.94
63.6741	92.2	63.7593	90.93
63.7574	92.19	63.8427	90.92
63.8408	92.18	63.9265	90.92
63.9241	92.17	64.0095	90.91
64.0074	92.15	64.0926	90.9
64.0905	92.15	64.1765	90.89
64.1738	92.14	64.2594	90.89
64.2574	92.13	64.3427	90.89
64.3405	92.12	64.4265	90.89
64.424	92.1	64.5094	90.89
64.5072	92.1	64.5928	90.89
64.5907	92.08	64.6764	90.88
64.6741	92.08	64.7593	90.88
64.7575	92.07	64.8427	90.88
64.8407	92.06	64.9266	90.87
64.9241	92.05	65.0094	90.85
65.0073	92.04	65.0927	90.85
65.0906	92.03	65.1766	90.85
65.1741	92.02	65.2594	90.85
65.2575	92.01	65.3426	90.84
65.3407	92	65.4265	90.83
65.424	91.99	65.5093	90.82
65.5072	91.98	65.5926	90.82
65.5907	91.97	65.6764	90.81
65.6739	91.96	65.7592	90.8
65.7573	91.95	65.8427	90.79
65.8406	91.94	65.9266	90.78
65.924	91.93	66.0095	90.77
66.0074	91.92	66.0929	90.76
66.0908	91.91	66.1766	90.75
66.1741	91.91	66.2593	90.74
66.2575	91.89	66.3427	90.73
66.3407	91.89	66.4263	90.73
66.4239	91.88	66.5092	90.72
66.5076	91.86	66.5926	90.71
66.5907	91.86	66.6764	90.7
66.6737	91.85	66.7592	90.69
66.7573	91.84	66.8426	90.69
66.8407	91.83	66.9267	90.68
66.9239	91.82	67.0093	90.67
67.0074	91.81	67.0927	90.66
67.0906	91.8	67.1766	90.65
67.174	91.79	67.2595	90.64
67.2575	91.78	67.3429	90.63
67.3407	91.78	67.4264	90.62
67.4241	91.77	67.5094	90.62
67.5077	91.76	67.5926	90.61
67.5906	91.75	67.6765	90.6
67.6738	91.74	67.7594	90.59
67.7573	91.73	67.8428	90.58
67.8406	91.72	67.9265	90.58
67.924	91.71	68.0093	90.57
68.0075	91.7	68.0927	90.56
68.0907	91.69	68.1764	90.56
68.1739	91.68	68.2595	90.55
68.2575	91.68	68.3429	90.54
68.3406	91.67	68.4264	90.53
68.4239	91.66	68.5093	90.53
68.5073	91.65	68.5928	90.52
68.5906	91.64	68.6766	90.51
68.6739	91.63	68.7595	90.5
68.7572	91.62	68.8427	90.49
68.8405	91.61	68.9266	90.49
68.9238	91.6	69.0094	90.48
69.0073	91.6	69.0928	90.47
69.0906	91.59	69.1765	90.46
69.1738	91.58	69.2593	90.45
69.2571	91.57	69.3427	90.44
69.3406	91.56	69.4266	90.44
69.4239	91.55	69.5092	90.43
69.5074	91.55	69.5928	90.42
69.6221	91.53	69.6765	90.41
69.7071	91.52	69.7595	90.4
69.7903	91.51	69.8429	90.39
69.8737	91.5	69.9267	90.38
69.9572	91.5	70.0094	90.37
70.0404	91.49	70.0928	90.36
70.1239	91.48	70.1765	90.35
70.2071	91.47	70.2592	90.34
70.2905	91.46	70.3427	90.33
70.3738	91.45	70.4266	90.32
70.4572	91.44	70.5092	90.3
70.5405	91.43	70.5926	90.29
70.668	91.42	70.6767	90.28
70.7571	91.41	70.7595	90.27
70.8406	91.4	70.8423	90.26
70.9236	91.39	70.926	90.25
71.0072	91.38	71.0091	90.24
71.1098	91.36	71.0923	90.23
71.2132	91.35	71.1758	90.22
71.2905	91.34	71.2591	90.22
71.3738	91.33	71.3424	90.22
71.4571	91.33	71.426	90.21
71.5407	91.32	71.5092	90.2
71.6239	91.31	71.5924	90.2
71.7073	91.3	71.6759	90.19
71.7903	91.3	71.7592	90.18
71.8737	91.28	71.8425	90.17
71.957	91.27	71.926	90.16
72.0403	91.26	72.0091	90.15
72.1238	91.25	72.0923	90.14
72.2072	91.24	72.1757	90.13
72.2905	91.23	72.2591	90.12
72.374	91.21	72.3423	90.11
72.4572	91.2	72.4258	90.1
72.5405	91.19	72.5179	90.09
72.6239	91.18	72.5932	90.08
72.7071	91.16	72.6766	90.07
72.7905	91.15	72.7598	90.06
72.8739	91.14	72.8432	90.06
72.9572	91.13	72.9266	90.04
73.0403	91.11	73.01	90.04
73.1239	91.1	73.0931	90.03
73.207	91.09	73.1767	90.02
73.2904	91.08	73.2599	90.02
73.3739	91.07	73.3433	90.01
73.4571	91.06	73.4264	90
73.5404	91.04	73.5096	90
73.6239	91.04	73.5931	89.99
73.7072	91.02	73.6765	89.98
73.7906	91.01	73.7599	89.97
73.8739	91	73.8431	89.96
73.9572	90.99	73.9267	89.95
74.0405	90.98	74.0098	89.94
74.1239	90.97	74.0932	89.94
74.2071	90.96	74.1766	89.93
74.2904	90.94	74.2597	89.92
74.3739	90.93	74.3432	89.9
74.4569	90.92	74.4267	89.9
74.5404	90.91	74.5099	89.89
74.6239	90.9	74.5932	89.88
74.7072	90.89	74.6765	89.87
74.7904	90.88	74.7598	89.86
74.8738	90.87	74.8431	89.85
74.9571	90.87	74.9266	89.85
75.0404	90.86	75.0097	89.84
75.124	90.85	75.0931	89.83
75.2072	90.84	75.1765	89.82
75.2905	90.83	75.2598	89.82
75.3853	90.82	75.3432	89.81
75.4738	90.81	75.4266	89.8
75.5573	90.8	75.5099	89.79
75.6406	90.79	75.5931	89.79
75.724	90.78	75.6767	89.78
75.8072	90.77	75.7599	89.77
75.8908	90.76	75.8432	89.76
75.9739	90.74	75.9268	89.76
76.0572	90.74	76.0099	89.75
76.1408	90.74	76.0931	89.74
76.2241	90.74	76.1765	89.73
76.307	90.73	76.2598	89.72
76.402	90.73	76.3433	89.71
76.4905	90.71	76.4264	89.71
76.5739	90.71	76.5099	89.7
76.6574	90.69	76.5931	89.7
76.7405	90.68	76.6764	89.68
76.824	90.67	76.76	89.68
76.9304	90.66	76.8432	89.67
77.0074	90.64	76.9266	89.66
77.0907	90.63	77.01	89.66
77.1739	90.62	77.0933	89.65
77.2572	90.6	77.1848	89.64
77.3406	90.6	77.2596	89.64
77.424	90.58	77.3432	89.63
77.5072	90.58	77.4264	89.62
77.5906	90.57	77.5098	89.61
77.6739	90.56	77.5931	89.6
77.7572	90.55	77.6832	89.6
77.8406	90.54	77.7599	89.59
77.924	90.53	77.8433	89.58
78.0072	90.52	77.9265	89.57
78.0905	90.52	78.0101	89.57
78.174	90.51	78.0932	89.56
78.2572	90.5	78.1766	89.55
78.3406	90.49	78.2601	89.54
78.4242	90.48	78.3431	89.54
78.5073	90.47	78.4263	89.53
78.5904	90.47	78.5099	89.52
78.6739	90.46	78.5931	89.52
78.7571	90.45	78.6764	89.51
78.8406	90.45	78.7598	89.5
78.9238	90.44	78.8432	89.49
79.0073	90.44	78.9266	89.49
79.0905	90.43	79.0099	89.48
79.1741	90.43	79.0931	89.48
79.2574	90.42	79.1767	89.47
79.3405	90.41	79.2599	89.47
79.4239	90.41	79.3433	89.47
79.5074	90.4	79.4267	89.45
79.5907	90.39	79.5101	89.44
79.6741	90.39	79.5931	89.44
79.7572	90.39	79.6763	89.44
79.8404	90.38	79.76	89.43
79.9239	90.38	79.8431	89.42
80.0071	90.37	79.9264	89.41
80.0906	90.36	80.0099	89.41
80.1741	90.36	80.0931	89.4
80.2572	90.35	80.1765	89.39
80.3407	90.34	80.26	89.38
80.4239	90.34	80.3432	89.38
80.5072	90.33	80.4265	89.37
80.5906	90.32	80.51	89.36
80.6742	90.31	80.5933	89.35
80.7572	90.31	80.6766	89.34
80.8408	90.3	80.76	89.34
80.9238	90.29	80.8434	89.33
81.0073	90.28	80.9265	89.32
81.0906	90.27	81.0098	89.31
81.1739	90.27	81.0932	89.3
81.2571	90.26	81.1765	89.3
81.3407	90.25	81.2598	89.29
81.4239	90.24	81.3432	89.28
81.5073	90.23	81.4267	89.27
81.5906	90.23	81.5099	89.26
81.6741	90.22	81.5932	89.25
81.7572	90.21	81.6767	89.24
81.8404	90.2	81.7601	89.23
81.924	90.19	81.8432	89.23
82.0071	90.19	81.9267	89.22
82.0906	90.18	82.0099	89.21
82.174	90.17	82.0931	89.2
82.2572	90.16	82.1765	89.2
82.3405	90.15	82.2599	89.18
82.4239	90.14	82.3431	89.18
82.5072	90.13	82.4266	89.17
82.5907	90.13	82.51	89.16
82.6741	90.12	82.5931	89.15
82.7571	90.11	82.6766	89.15
82.8406	90.1	82.7599	89.14
82.924	90.09	82.8431	89.13
83.0072	90.08	82.9264	89.12
83.0906	90.07	83.0099	89.11
83.174	90.06	83.0934	89.11
83.2571	90.05	83.1764	89.1
83.3406	90.04	83.2598	89.09
83.4238	90.03	83.3431	89.08
83.5072	90.02	83.4264	89.07
83.5905	90.01	83.5099	89.07
83.674	90.01	83.5931	89.06
83.7573	89.99	83.6766	89.05
83.8407	89.98	83.7601	89.04
83.9241	89.98	83.8433	89.03
84.0073	89.96	83.9267	89.03
84.0907	89.96	84.0102	89.02
84.1742	89.95	84.0932	89.01
84.2571	89.94	84.1767	89
84.3404	89.93	84.2601	88.99
84.4238	89.92	84.3433	88.99
84.5073	89.91	84.4268	88.98
84.5906	89.9	84.5098	88.97
84.6741	89.89	84.5932	88.96
84.7573	89.88	84.6766	88.96
84.8405	89.87	84.7601	88.95
84.924	89.86	84.8431	88.94
85.0073	89.86	84.9266	88.94
85.0905	89.85	85.01	88.93
85.174	89.84	85.0933	88.92
85.2574	89.83	85.1768	88.91
85.3405	89.82	85.2601	88.9
85.424	89.81	85.3432	88.9
85.507	89.81	85.4268	88.89
85.5906	89.8	85.5101	88.88
85.6738	89.79	85.5934	88.87
85.7572	89.78	85.6767	88.86
85.8406	89.77	85.7598	88.85
85.9241	89.76	85.8432	88.85
86.0072	89.75	85.9264	88.84
86.0907	89.74	86.01	88.83
86.1741	89.73	86.0931	88.82
86.2574	89.73	86.1766	88.82
86.3406	89.72	86.2601	88.81
86.4239	89.71	86.3434	88.8
86.5073	89.7	86.4267	88.79
86.5907	89.69	86.5102	88.78
86.6741	89.68	86.5932	88.8
86.7572	89.67	86.6767	88.79
86.8404	89.67	86.7602	88.78
86.9239	89.66	86.8432	88.77
87.0072	89.65	86.9267	88.74
87.0905	89.64	87.01	88.73
87.174	89.63	87.0933	88.73
87.2572	89.62	87.1765	88.72
87.3405	89.61	87.2599	88.71
87.4241	89.6	87.3432	88.7
87.5073	89.6	87.4264	88.7
87.5905	89.59	87.5099	88.69
87.6741	89.58	87.5934	88.68
87.7571	89.57	87.6768	88.67
87.8405	89.56	87.76	88.66
87.924	89.55	87.8434	88.65
88.0071	89.54	87.9266	88.64
88.0904	89.53	88.0102	88.64
88.1738	89.53	88.0933	88.63
88.2572	89.52	88.1766	88.62
88.3405	89.51	88.26	88.62
88.4241	89.5	88.3432	88.62
88.5074	89.49	88.4265	88.62
88.5906	89.48	88.5099	88.62
88.6741	89.47	88.5933	88.6
88.7574	89.47	88.6767	88.6
88.8405	89.46	88.76	88.59
88.9239	89.45	88.8433	88.58
89.0072	89.44	88.9267	88.57
89.0905	89.43	89.01	88.56
89.1739	89.42	89.0934	88.55
89.2571	89.41	89.1767	88.54
89.3406	89.41	89.26	88.53
89.4239	89.4	89.3431	88.52
89.5074	89.39	89.4264	88.52
89.5905	89.38	89.51	88.5
89.674	89.37	89.5931	88.5
89.7573	89.36	89.6766	88.49
89.8406	89.35	89.7598	88.48
89.9239	89.34	89.8433	88.47
90.0073	89.34	89.9267	88.46
90.0905	89.33	90.0101	88.45
90.1741	89.32	90.0934	88.44
90.2574	89.31	90.1767	88.43
90.3405	89.3	90.26	88.43
90.424	89.29	90.3432	88.42
90.5072	89.29	90.4267	88.41
90.5905	89.28	90.5101	88.4
90.674	89.27	90.5933	88.39
90.7571	89.26	90.6766	88.38
90.8406	89.25	90.7598	88.37
90.9241	89.25	90.8433	88.37
91.0072	89.25	90.9265	88.36
91.0904	89.24	91.0099	88.35
91.1739	89.23	91.0932	88.34
91.2573	89.23	91.1766	88.34
91.3407	89.22	91.26	88.32
91.4241	89.21	91.3434	88.32
91.5073	89.2	91.4267	88.31
91.5906	89.19	91.5101	88.3
91.6738	89.18	91.5934	88.29
91.7573	89.17	91.6766	88.28
91.8406	89.16	91.7602	88.27
91.924	89.15	91.8433	88.26
92.0071	89.14	91.9263	88.26
92.0907	89.13	92.0099	88.25
92.1741	89.12	92.0933	88.24
92.2573	89.11	92.1765	88.23
92.3406	89.1	92.26	88.22
92.424	89.09	92.3432	88.22
92.5073	89.08	92.4266	88.21
92.5905	89.07	92.5101	88.2
92.6739	89.06	92.5933	88.19
92.7572	89.05	92.6767	88.19
92.8405	89.04	92.7603	88.18
92.9239	89.03	92.8432	88.17
93.0072	89.02	92.9264	88.16
93.0904	89.01	93.0099	88.15
93.1741	89	93.0932	88.14
93.2572	88.99	93.1766	88.14
93.3406	88.98	93.2602	88.13
93.4241	88.97	93.3433	88.12
93.5072	88.96	93.4266	88.11
93.5905	88.96	93.5101	88.11
93.6741	88.95	93.5932	88.1
93.7572	88.94	93.6765	88.09
93.8403	88.94	93.76	88.08
93.9239	88.93	93.8432	88.07
94.0072	88.92	93.9265	88.06
94.0904	88.92	94.0098	88.06
94.1739	88.91	94.0931	88.05
94.2571	88.9	94.1764	88.04
94.3404	88.89	94.26	88.03
94.4238	88.88	94.3432	88.03
94.5073	88.87	94.4265	88.02
94.5905	88.86	94.5097	88.01
94.674	88.84	94.5932	88
94.7573	88.83	94.6765	88
94.8405	88.82	94.76	87.99
94.9241	88.8	94.8747	87.98
95.0072	88.79	94.9597	87.97
95.0904	88.78	95.0429	87.96
95.1739	88.77	95.1263	87.95
95.2571	88.76	95.2099	87.95
95.363	88.74	95.293	87.94
95.4407	88.73	95.3765	87.93
95.524	88.72	95.4597	87.92
95.6074	88.71	95.5431	87.91
95.6905	88.7	95.6264	87.91
95.7741	88.69	95.7098	87.9
95.8572	88.68	95.7931	87.89
95.9407	88.67	95.9206	87.88
96.0241	88.66	96.0097	87.87
96.1071	88.65	96.0932	87.86
96.1907	88.63	96.1763	87.85
96.274	88.62	96.2598	87.84
96.357	88.61	96.3624	87.83
96.4405	88.6	96.4658	87.82
96.5241	88.59	96.5431	87.8
96.6071	88.58	96.6264	87.8
96.6904	88.57	96.7098	87.79
96.7742	88.56	96.7933	87.79
96.8573	88.55	96.8765	87.78
96.9407	88.55	96.9599	87.77
97.024	88.54	97.0429	87.77
97.1072	88.54	97.1263	87.75
97.1906	88.53	97.2096	87.75
97.274	88.52	97.293	87.73
97.3574	88.52	97.3764	87.72
97.4406	88.51	97.4598	87.71
97.5241	88.5	97.5431	87.7
97.6071	88.49	97.6266	87.69
97.6904	88.47	97.7098	87.68
97.7739	88.46	97.7931	87.66
97.8572	88.45	97.8765	87.65
97.9406	88.43	97.9597	87.64
98.0239	88.42	98.0431	87.62
98.1072	88.41	98.1265	87.61
98.1905	88.4	98.2098	87.6
98.2739	88.39	98.2929	87.59
98.3572	88.37	98.3765	87.57
98.4404	88.36	98.4596	87.56
98.5241	88.35	98.543	87.55
98.6073	88.34	98.6265	87.54
98.6907	88.33	98.7098	87.53
98.774	88.32	98.793	87.51
98.8574	88.31	98.8765	87.5
98.9406	88.3	98.9598	87.49
99.0238	88.29	99.0432	87.48
99.1072	88.28	99.1265	87.47
99.1904	88.27	99.2099	87.46
99.2738	88.26	99.2931	87.44
99.3571	88.25	99.3765	87.43
99.4406	88.24	99.4597	87.42
99.5241	88.24	99.543	87.41
99.6074	88.23	99.6265	87.4
99.6906	88.22	99.7096	87.39
99.7741	88.21	99.7931	87.38
99.8574	88.21	99.8765	87.37
99.9408	88.2	99.9598	87.36
100.024	88.19	100.043	87.35
100.107	88.19	100.126	87.34
100.191	88.19	100.21	87.34
100.274	88.18	100.293	87.33
100.357	88.17	100.377	87.32
100.441	88.17	100.46	87.31
100.524	88.16	100.543	87.31
100.607	88.15	100.638	87.3
100.691	88.14	100.726	87.3
100.774	88.13	100.81	87.29
100.857	88.12	100.893	87.27
100.941	88.11	100.977	87.25
101.024	88.1	101.06	87.24
101.107	88.09	101.143	87.22
101.191	88.08	101.227	87.21
101.274	88.07	101.31	87.21
101.358	88.06	101.393	87.2
101.441	88.05	101.477	87.2
101.524	88.04	101.56	87.19
101.607	88.04	101.655	87.18
101.691	88.04	101.743	87.17
101.774	88.04	101.826	87.16
101.857	88.03	101.91	87.14
101.94	88.03	101.993	87.13
102.024	88.03	102.077	87.12
102.107	88.02	102.183	87.1
102.191	88.01	102.26	87.09
102.274	88.01	102.343	87.08
102.357	88	102.427	87.07
102.441	88	102.51	87.06
102.524	87.99	102.593	87.04
102.607	87.99	102.677	87.03
102.691	87.98	102.76	87.03
102.774	87.97	102.843	87.02
102.857	87.96	102.927	87.01
102.94	87.96	103.01	87
103.024	87.95	103.093	86.99
103.107	87.94	103.177	86.99
103.191	87.94	103.26	86.97
103.274	87.93	103.343	86.97
103.357	87.92	103.427	86.96
103.441	87.91	103.51	86.95
103.524	87.91	103.593	86.95
103.607	87.9	103.677	86.94
103.691	87.89	103.76	86.93
103.774	87.88	103.843	86.93
103.857	87.87	103.927	86.92
103.941	87.87	104.01	86.92
104.024	87.86	104.093	86.91
104.107	87.85	104.176	86.91
104.191	87.84	104.26	86.9
104.274	87.83	104.343	86.89
104.357	87.83	104.427	86.89
104.44	87.82	104.51	86.91
104.524	87.81	104.593	86.9
104.607	87.8	104.677	86.9
104.691	87.79	104.76	86.89
104.774	87.78	104.843	86.89
104.857	87.78	104.927	86.89
104.941	87.77	105.01	86.88
105.024	87.76	105.093	86.88
105.107	87.75	105.177	86.88
105.191	87.74	105.26	86.87
105.274	87.74	105.343	86.87
105.357	87.73	105.427	86.84
105.441	87.72	105.51	86.83
105.524	87.71	105.593	86.83
105.607	87.7	105.677	86.82
105.691	87.7	105.76	86.82
105.774	87.69	105.843	86.81
105.857	87.68	105.927	86.81
105.941	87.67	106.01	86.8
106.024	87.66	106.093	86.8
106.107	87.65	106.176	86.79
106.191	87.65	106.26	86.78
106.274	87.64	106.343	86.78
106.357	87.63	106.427	86.77
106.441	87.62	106.51	86.77
106.524	87.61	106.593	86.76
106.607	87.6	106.677	86.75
106.691	87.6	106.76	86.74
106.774	87.59	106.843	86.74
106.857	87.58	106.927	86.73
106.941	87.57	107.01	86.72
107.024	87.56	107.093	86.72
107.107	87.55	107.177	86.71
107.191	87.54	107.26	86.7
107.274	87.53	107.343	86.7
107.357	87.52	107.427	86.7
107.441	87.51	107.51	86.69
107.524	87.5	107.593	86.68
107.607	87.49	107.677	86.68
107.691	87.48	107.76	86.67
107.774	87.48	107.843	86.66
107.857	87.46	107.927	86.65
107.941	87.45	108.01	86.64
108.024	87.45	108.093	86.64
108.107	87.44	108.177	86.63
108.191	87.43	108.26	86.62
108.274	87.42	108.343	86.61
108.357	87.41	108.427	86.6
108.44	87.4	108.51	86.6
108.524	87.4	108.593	86.59
108.607	87.39	108.676	86.57
108.691	87.38	108.76	86.57
108.774	87.37	108.843	86.56
108.857	87.36	108.927	86.55
108.941	87.35	109.01	86.54
109.024	87.34	109.093	86.54
109.107	87.34	109.177	86.53
109.191	87.33	109.26	86.52
109.274	87.32	109.343	86.51
109.357	87.31	109.427	86.51
109.441	87.3	109.51	86.49
109.524	87.3	109.593	86.49
109.607	87.3	109.676	86.48
109.691	87.3	109.76	86.47
109.774	87.29	109.843	86.47
109.857	87.29	109.927	86.46
109.941	87.28	110.01	86.45
110.024	87.27	110.093	86.44
110.107	87.26	110.177	86.43
110.191	87.26	110.26	86.43
110.274	87.24	110.343	86.42
110.357	87.23	110.427	86.41
110.441	87.23	110.51	86.4
110.524	87.22	110.593	86.4
110.607	87.2	110.677	86.39
110.691	87.2	110.76	86.38
110.774	87.19	110.843	86.38
110.857	87.18	110.926	86.37
110.941	87.17	111.01	86.36
111.024	87.16	111.093	86.35
111.107	87.15	111.177	86.35
111.191	87.14	111.26	86.34
111.274	87.13	111.343	86.33
111.357	87.12	111.427	86.32
111.441	87.11	111.51	86.32
111.524	87.11	111.593	86.31
111.607	87.09	111.677	86.3
111.691	87.08	111.76	86.29
111.774	87.08	111.843	86.28
111.857	87.07	111.927	86.3
111.941	87.06	112.01	86.29
112.024	87.05	112.093	86.29
112.107	87.04	112.177	86.28
112.191	87.03	112.26	86.27
112.274	87.02	112.343	86.26
112.357	87.01	112.427	86.26
112.441	87.01	112.51	86.23
112.524	86.99	112.593	86.22
112.607	86.98	112.677	86.21
112.691	86.98	112.76	86.2
112.774	86.97	112.843	86.19
112.857	86.96	112.927	86.19
112.941	86.95	113.01	86.18
113.024	86.94	113.093	86.17
113.107	86.93	113.177	86.16
113.191	86.93	113.26	86.16
113.274	86.92	113.343	86.15
113.357	86.91	113.426	86.14
113.441	86.9	113.51	86.13
113.524	86.89	113.593	86.12
113.607	86.88	113.677	86.12
113.691	86.87	113.76	86.11
113.774	86.86	113.843	86.1
113.857	86.85	113.927	86.09
113.941	86.85	114.01	86.09
114.024	86.84	114.093	86.08
114.107	86.83	114.177	86.07
114.191	86.82	114.26	86.07
114.274	86.81	114.343	86.06
114.357	86.81	114.427	86.05
114.441	86.79	114.51	86.04
114.524	86.79	114.593	86.04
114.607	86.78	114.677	86.03
114.691	86.77	114.76	86.02
114.774	86.76	114.843	86.01
114.857	86.75	114.927	86
114.94	86.74	115.01	85.99
115.024	86.74	115.093	85.99
115.107	86.73	115.177	85.98
115.191	86.72	115.26	85.97
115.274	86.72	115.343	85.96
115.357	86.7	115.427	85.96
115.441	86.7	115.51	85.95
115.524	86.69	115.593	85.94
115.607	86.68	115.677	85.94
115.691	86.67	115.76	85.93
115.774	86.67	115.843	85.92
115.857	86.66	115.927	85.91
115.941	86.65	116.01	85.91
116.024	86.64	116.093	85.89
116.107	86.63	116.177	85.9
116.191	86.62	116.26	85.9
116.274	86.61	116.343	85.89
116.357	86.6	116.427	85.89
116.441	86.6	116.51	85.88
116.524	86.59	116.593	85.88
116.607	86.58	116.677	85.87
116.691	86.57	116.76	85.86
116.774	86.57	116.843	85.85
116.857	86.56	116.926	85.84
116.941	86.55	117.01	85.83
117.024	86.54	117.093	85.82
117.107	86.53	117.177	85.81
117.191	86.52	117.26	85.8
117.274	86.52	117.343	85.8
117.357	86.51	117.427	85.78
117.441	86.5	117.51	85.77
117.524	86.49	117.593	85.76
117.607	86.48	117.677	85.75
117.691	86.47	117.76	85.74
117.774	86.46	117.843	85.74
117.857	86.46	117.927	85.73
117.941	86.45	118.01	85.72
118.024	86.44	118.093	85.7
118.107	86.43	118.177	85.7
118.191	86.42	118.26	85.69
118.274	86.41	118.343	85.68
118.357	86.4	118.427	85.67
118.441	86.38	118.51	85.66
118.524	86.37	118.593	85.65
118.607	86.36	118.677	85.65
118.691	86.35	118.76	85.64
118.774	86.33	118.843	85.63
118.857	86.32	118.927	85.62
118.941	86.31	119.01	85.62
119.024	86.3	119.093	85.62
119.107	86.29	119.177	85.61
119.191	86.27	119.26	85.6
119.274	86.27	119.343	85.6
119.357	86.25	119.427	85.6
119.441	86.24	119.51	85.59
119.524	86.23	119.593	85.58
119.608	86.22	119.676	85.57
119.69	86.21	119.76	85.56
119.774	86.2	119.843	85.55
119.857	86.19	119.927	85.54
119.941	86.18	120.01	85.52
120.024	86.17	120.093	85.51
120.107	86.16	120.177	85.5
120.191	86.15	120.26	85.49
120.274	86.13	120.343	85.47
120.357	86.12	120.427	85.46
120.441	86.11	120.51	85.45
120.524	86.1	120.616	85.44
120.607	86.09	120.693	85.42
120.691	86.08	120.777	85.41
120.774	86.07	120.86	85.4
120.857	86.06	120.943	85.39
120.941	86.05	121.027	85.38
121.024	86.04	121.11	85.37
121.107	86.03	121.193	85.36
121.191	86.02	121.277	85.35
121.274	86.01	121.36	85.34
121.357	86	121.443	85.33
121.441	85.99	121.527	85.32
121.524	85.98	121.61	85.31
121.607	85.97	121.693	85.3
121.691	85.96	121.777	85.29
121.774	85.95	121.86	85.28
121.857	85.94	121.943	85.27
121.941	85.93	122.027	85.26
122.024	85.92	122.11	85.25
122.107	85.91	122.193	85.25
122.191	85.91	122.277	85.24
122.274	85.9	122.36	85.24
122.357	85.89	122.443	85.23
122.44	85.88	122.527	85.23
122.524	85.87	122.61	85.22
122.607	85.87	122.693	85.21
122.69	85.86	122.777	85.2
122.774	85.85	122.86	85.19
122.857	85.85	122.943	85.18
122.941	85.85	123.026	85.17
123.024	85.85	123.11	85.15
123.107	85.84	123.193	85.15
123.191	85.84	123.276	85.13
123.274	85.83	123.36	85.12
123.357	85.83	123.443	85.11
123.441	85.82	123.526	85.1
123.524	85.81	123.61	85.08
123.607	85.8	123.693	85.07
123.691	85.8	123.777	85.06
123.774	85.79	123.86	85.05
123.857	85.78	123.943	85.04
123.941	85.77	124.027	85.03
124.024	85.76	124.11	85.01
124.107	85.76	124.193	85
124.191	85.75	124.276	84.99
124.274	85.74	124.36	84.99
124.357	85.73	124.443	84.98
124.441	85.73	124.526	84.97
124.524	85.72	124.61	84.96
124.607	85.71	124.693	84.95
124.691	85.71	124.777	84.94
124.781	85.7	124.86	84.94
124.857	85.69	124.943	84.93
124.943	85.69	125.027	84.92
125.023	85.68	125.11	84.92
125.107	85.68	125.193	84.91
125.19	85.67	125.277	84.91
125.273	85.67	125.36	84.91
125.357	85.66	125.443	84.9
125.44	85.66	125.526	84.9
125.524	85.65	125.61	84.89
125.607	85.65	125.693	84.89
125.69	85.65	125.776	84.88
125.773	85.64	125.86	84.87
125.857	85.64	125.943	84.86
125.952	85.64	126.026	84.86
126.04	85.64	126.11	84.85
126.124	85.63	126.193	84.84
126.207	85.63	126.277	84.83
126.29	85.63	126.36	84.82
126.374	85.63	126.443	84.81
126.478	85.62	126.527	84.8
126.557	85.62	126.61	84.8
126.64	85.62	126.693	84.79
126.724	85.61	126.777	84.78
126.807	85.61	126.86	84.78
126.89	85.6	126.943	84.78
126.974	85.6	127.027	84.78
127.057	85.59	127.11	84.77
127.14	85.58	127.193	84.77
127.224	85.58	127.277	84.77
127.307	85.58	127.36	84.76
127.39	85.57	127.443	84.76
127.474	85.56	127.527	84.76
127.557	85.56	127.61	84.76
127.64	85.55	127.693	84.75
127.724	85.54	127.777	84.74
127.807	85.54	127.86	84.74
127.89	85.53	127.943	84.73
127.974	85.53	128.027	84.73
128.057	85.52	128.11	84.72
128.14	85.51	128.193	84.72
128.224	85.5	128.277	84.71
128.307	85.5	128.36	84.71
128.39	85.49	128.443	84.7
128.474	85.48	128.527	84.7
128.557	85.47	128.61	84.69
128.64	85.47	128.693	84.68
128.724	85.46	128.777	84.68
128.807	85.45	128.86	84.67
128.89	85.44	128.943	84.66
128.974	85.44	129.026	84.66
129.057	85.43	129.11	84.65
129.14	85.42	129.193	84.65
129.224	85.41	129.277	84.64
129.307	85.41	129.36	84.63
129.39	85.4	129.443	84.63
129.474	85.39	129.526	84.62
129.557	85.38	129.61	84.61
129.64	85.38	129.693	84.6
129.724	85.37	129.776	84.6
129.807	85.36	129.86	84.59
129.89	85.35	129.943	84.58
129.974	85.35	130.027	84.58
130.057	85.34	130.11	84.57
130.14	85.33	130.193	84.56
130.224	85.32	130.277	84.55
130.307	85.31	130.36	84.55
130.39	85.31	130.443	84.54
130.474	85.31	130.527	84.53
130.557	85.3	130.61	84.53
130.64	85.3	130.693	84.52
130.724	85.29	130.776	84.51
130.807	85.28	130.86	84.51
130.89	85.28	130.943	84.5
130.974	85.27	131.027	84.49
131.057	85.26	131.11	84.49
131.14	85.25	131.193	84.48
131.224	85.24	131.277	84.47
131.307	85.24	131.36	84.46
131.39	85.22	131.443	84.46
131.474	85.22	131.527	84.45
131.557	85.21	131.61	84.45
131.64	85.2	131.693	84.44
131.724	85.17	131.777	84.43
131.821	85.17	131.86	84.42
131.907	85.16	131.943	84.41
131.99	85.15	132.027	84.41
132.074	85.14	132.11	84.4
132.157	85.12	132.193	84.39
132.24	85.1	132.277	84.38
132.333	85.07	132.36	84.37
132.407	85.05	132.443	84.37
132.491	85.03	132.526	84.35
132.574	85	132.61	84.35
132.657	84.97	132.693	84.34
132.74	84.94	132.777	84.33
132.831	84.91	132.86	84.32
132.912	84.89	132.943	84.31
132.99	84.86	133.027	84.31
133.074	84.84	133.11	84.3
133.157	84.82	133.193	84.29
133.24	84.8	133.276	84.28
133.324	84.78	133.36	84.27
133.407	84.76	133.443	84.27
133.49	84.74	133.527	84.26
133.574	84.72	133.61	84.25
133.657	84.71	133.693	84.25
133.74	84.69	133.777	84.24
133.824	84.68	133.86	84.23
133.907	84.66	133.943	84.22
133.99	84.65	134.027	84.22
134.074	84.64	134.11	84.21
134.157	84.62	134.193	84.2
134.24	84.61	134.277	84.19
134.324	84.6	134.36	84.19
134.407	84.6	134.443	84.18
134.49	84.58	134.527	84.17
134.574	84.57	134.61	84.17
134.657	84.56	134.693	84.16
134.74	84.55	134.777	84.15
134.824	84.54	134.86	84.15
134.907	84.53	134.943	84.15
134.99	84.52	135.027	84.16
135.074	84.51	135.11	84.15
135.157	84.5	135.193	84.14
135.241	84.49	135.277	84.14
135.324	84.48	135.36	84.14
135.407	84.47	135.443	84.12
135.49	84.47	135.527	84.11
135.574	84.45	135.61	84.11
135.657	84.45	135.693	84.1
135.74	84.44	135.777	84.09
135.824	84.43	135.86	84.08
135.907	84.42	135.943	84.07
135.991	84.41	136.026	84.07
136.074	84.4	136.11	84.06
136.157	84.4	136.193	84.04
136.24	84.39	136.276	84.04
136.324	84.38	136.36	84.03
136.407	84.37	136.443	84.02
136.49	84.36	136.526	84.01
136.574	84.36	136.61	84
136.657	84.34	136.693	84
136.74	84.34	136.777	83.99
136.824	84.33	136.86	83.98
136.907	84.32	136.943	83.97
136.99	84.31	137.027	83.97
137.074	84.31	137.11	83.96
137.157	84.3	137.193	83.95
137.241	84.29	137.277	83.94
137.324	84.28	137.36	83.93
137.407	84.27	137.443	83.93
137.49	84.26	137.526	83.92
137.574	84.26	137.61	83.91
137.657	84.25	137.693	83.9
137.741	84.24	137.777	83.89
137.824	84.23	137.86	83.88
137.907	84.22	137.943	83.87
137.99	84.22	138.026	83.87
138.074	84.21	138.11	83.86
138.157	84.2	138.193	83.85
138.24	84.19	138.277	83.84
138.324	84.18	138.36	83.83
138.407	84.17	138.443	83.83
138.49	84.16	138.526	83.82
138.574	84.16	138.61	83.83
138.657	84.15	138.693	83.83
138.741	84.14	138.777	83.82
138.824	84.13	138.86	83.81
138.907	84.13	138.943	83.8
138.991	84.12	139.026	83.79
139.074	84.11	139.11	83.78
139.157	84.1	139.193	83.78
139.24	84.1	139.277	83.77
139.324	84.11	139.36	83.76
139.407	84.11	139.443	83.73
139.49	84.11	139.527	83.72
139.574	84.1	139.61	83.72
139.657	84.09	139.693	83.71
139.741	84.08	139.776	83.7
139.824	84.08	139.86	83.69
139.907	84.06	139.943	83.69
139.99	84.05	140.026	83.68
140.074	84.04	140.11	83.67
140.157	84.03	140.193	83.67
140.24	84.02	140.277	83.66
140.323	84	140.36	83.65
140.406	83.99	140.443	83.65
140.49	83.98	140.527	83.64
140.573	83.97	140.61	83.63
140.656	83.96	140.693	83.62
140.74	83.95	140.777	83.62
140.823	83.93	140.86	83.61
140.906	83.92	140.943	83.6
140.989	83.91	141.027	83.6
141.073	83.91	141.11	83.59
141.156	83.9	141.193	83.58
141.24	83.89	141.276	83.57
141.323	83.88	141.36	83.57
141.406	83.87	141.443	83.56
141.49	83.86	141.527	83.55
141.573	83.85	141.61	83.54
141.656	83.84	141.693	83.53
141.74	83.83	141.777	83.53
141.823	83.82	141.86	83.52
141.906	83.81	141.943	83.51
141.99	83.8	142.027	83.5
142.073	83.79	142.11	83.5
142.156	83.79	142.193	83.49
142.24	83.78	142.277	83.48
142.323	83.77	142.36	83.48
142.406	83.76	142.443	83.47
142.49	83.75	142.527	83.47
142.573	83.74	142.61	83.46
142.656	83.74	142.693	83.47
142.74	83.73	142.777	83.46
142.823	83.72	142.86	83.46
142.907	83.71	142.943	83.45
142.99	83.7	143.027	83.44
143.073	83.69	143.11	83.43
143.156	83.69	143.193	83.43
143.24	83.68	143.277	83.42
143.323	83.67	143.36	83.41
143.406	83.66	143.443	83.4
143.49	83.65	143.527	83.39
143.573	83.64	143.61	83.38
143.656	83.63	143.693	83.34
143.74	83.62	143.777	83.33
143.823	83.61	143.86	83.32
143.906	83.61	143.943	83.31
143.99	83.59	144.026	83.3
144.073	83.58	144.11	83.29
144.156	83.58	144.193	83.28
144.24	83.57	144.277	83.26
144.323	83.56	144.36	83.26
144.406	83.55	144.443	83.24
144.49	83.54	144.527	83.23
144.573	83.54	144.61	83.22
144.656	83.53	144.693	83.21
144.74	83.52	144.777	83.2
144.823	83.51	144.86	83.19
144.906	83.5	144.943	83.19
145.021	83.49	145.026	83.17
145.107	83.48	145.11	83.16
145.19	83.47	145.193	83.15
145.274	83.46	145.276	83.14
145.357	83.45	145.36	83.13
145.44	83.44	145.443	83.12
145.535	83.44	145.527	83.11
145.623	83.43	145.61	83.1
145.707	83.42	145.693	83.09
145.79	83.41	145.777	83.08
145.873	83.41	145.86	83.07
145.956	83.4	145.943	83.06
146.04	83.39	146.027	83.05
146.124	83.39	146.11	83.04
146.207	83.38	146.193	83.03
146.29	83.37	146.277	83.03
146.373	83.36	146.36	83.02
146.457	83.36	146.443	83.01
146.54	83.35	146.526	83
146.624	83.35	146.61	82.99
146.706	83.34	146.693	82.98
146.79	83.33	146.777	82.97
146.873	83.33	146.86	82.96
146.956	83.32	146.943	82.95
147.04	83.31	147.027	82.94
147.123	83.3	147.11	82.94
147.206	83.3	147.193	82.92
147.29	83.29	147.277	82.92
147.373	83.28	147.36	82.91
147.457	83.28	147.443	82.9
147.54	83.28	147.527	82.9
147.623	83.28	147.61	82.89
147.706	83.27	147.693	82.88
147.79	83.26	147.777	82.88
147.874	83.26	147.86	82.87
147.956	83.25	147.943	82.86
148.04	83.24	148.026	82.86
148.123	83.23	148.11	82.85
148.206	83.22	148.193	82.85
148.29	83.21	148.277	82.85
148.373	83.2	148.36	82.85
148.456	83.19	148.443	82.85
148.54	83.18	148.527	82.84
148.623	83.17	148.61	82.84
148.707	83.16	148.693	82.83
148.79	83.15	148.777	82.83
148.873	83.14	148.86	82.82
148.956	83.14	148.943	82.81
149.04	83.12	149.027	82.81
149.123	83.12	149.11	82.8
149.206	83.11	149.193	82.79
149.29	83.1	149.276	82.79
149.373	83.09	149.36	82.78
149.456	83.08	149.443	82.77
149.54	83.08	149.527	82.77
149.623	83.07	149.61	82.76
149.706	83.06	149.693	82.75
149.79	83.05	149.777	82.75
149.873	83.04	149.86	82.74
149.956	83.03	149.943	82.74
150.04	83.02	150.034	82.73
150.123	83.02	150.11	82.73
150.206	83.01	150.196	82.72
150.29	83	150.276	82.72
150.373	82.99	150.359	82.71
150.456	82.98	150.443	82.7
150.54	82.97	150.526	82.7
150.623	82.96	150.609	82.69
150.707	82.96	150.693	82.69
150.79	82.95	150.776	82.68
150.873	82.94	150.859	82.68
150.957	82.93	150.943	82.67
151.04	82.93	151.026	82.67
151.123	82.91	151.11	82.66
151.206	82.91	151.205	82.66
151.29	82.9	151.293	82.66
151.373	82.9	151.376	82.65
151.456	82.89	151.459	82.64
151.54	82.88	151.543	82.64
151.623	82.87	151.626	82.64
151.706	82.87	151.731	82.63
151.79	82.86	151.81	82.63
151.873	82.85	151.893	82.62
151.956	82.84	151.976	82.61
152.04	82.84	152.06	82.61
152.124	82.83	152.143	82.6
152.206	82.82	152.226	82.6
152.29	82.81	152.31	82.59
152.373	82.81	152.393	82.58
152.456	82.8	152.476	82.58
152.54	82.79	152.56	82.57
152.623	82.78	152.643	82.57
152.706	82.78	152.726	82.56
152.79	82.77	152.81	82.55
152.873	82.76	152.893	82.55
152.956	82.75	152.976	82.54
153.04	82.74	153.06	82.53
153.123	82.73	153.143	82.53
153.206	82.72	153.226	82.52
153.29	82.72	153.31	82.51
153.373	82.71	153.393	82.51
153.456	82.7	153.476	82.5
153.54	82.69	153.56	82.49
153.623	82.68	153.643	82.49
153.706	82.68	153.726	82.5
153.79	82.67	153.81	82.49
153.873	82.66	153.893	82.49
153.956	82.66	153.976	82.49
154.04	82.65	154.06	82.48
154.123	82.64	154.143	82.47
154.206	82.63	154.226	82.47
154.29	82.63	154.31	82.46
154.373	82.62	154.393	82.45
154.456	82.61	154.476	82.44
154.54	82.6	154.56	82.44
154.623	82.6	154.643	82.43
154.707	82.59	154.726	82.43
154.79	82.58	154.81	82.42
154.873	82.57	154.893	82.41
154.956	82.56	154.976	82.41
155.04	82.56	155.059	82.4
155.123	82.55	155.143	82.39
155.206	82.54	155.226	82.38
155.29	82.54	155.31	82.38
155.373	82.53	155.393	82.37
155.457	82.52	155.476	82.36
155.54	82.51	155.56	82.35
155.623	82.5	155.643	82.35
155.706	82.5	155.726	82.35
155.79	82.49	155.81	82.35
155.873	82.48	155.893	82.34
155.956	82.47	155.976	82.33
156.04	82.47	156.06	82.33
156.124	82.46	156.143	82.33
156.206	82.45	156.226	82.31
156.29	82.44	156.31	82.31
156.373	82.44	156.393	82.3
156.456	82.45	156.476	82.29
156.54	82.45	156.56	82.28
156.623	82.44	156.643	82.28
156.706	82.44	156.726	82.27
156.79	82.43	156.81	82.26
156.873	82.42	156.893	82.26
156.956	82.41	156.976	82.24
157.04	82.4	157.074	82.23
157.123	82.39	157.16	82.2
157.206	82.38	157.243	82.19
157.29	82.37	157.327	82.18
157.374	82.36	157.41	82.17
157.456	82.35	157.493	82.16
157.54	82.34	157.586	82.14
157.623	82.33	157.66	82.13
157.706	82.33	157.743	82.12
157.79	82.32	157.827	82.11
157.873	82.31	157.91	82.09
157.956	82.3	157.993	82.08
158.04	82.29	158.083	82.06
158.123	82.28	158.165	82.05
158.206	82.27	158.243	82.03
158.29	82.26	158.326	82.01
158.373	82.25	158.41	82
158.456	82.25	158.493	81.98
158.54	82.24	158.577	81.97
158.623	82.23	158.66	81.96
158.706	82.22	158.743	81.94
158.79	82.21	158.827	81.93
158.873	82.21	158.91	81.92
158.956	82.19	158.993	81.9
159.04	82.19	159.077	81.89
159.123	82.18	159.16	81.88
159.207	82.17	159.243	81.87
159.29	82.16	159.326	81.86
159.373	82.15	159.41	81.84
159.456	82.14	159.493	81.84
159.54	82.13	159.576	81.82
159.623	82.13	159.66	81.81
159.706	82.12	159.743	81.8
159.79	82.11	159.827	81.79
159.873	82.1	159.91	81.78
159.957	82.09	159.993	81.77
160.04	82.09	160.076	81.76
160.123	82.08	160.16	81.75
160.206	82.07	160.243	81.74
160.29	82.06	160.327	81.74
160.373	82.06	160.41	81.72
160.456	82.05	160.493	81.71
160.54	82.04	160.576	81.71
160.623	82.03	160.66	81.7
160.706	82.03	160.743	81.69
160.79	82.02	160.827	81.68
160.873	82.01	160.91	81.67
160.956	82	160.993	81.66
161.04	82	161.077	81.65
161.123	81.99	161.16	81.65
161.206	81.98	161.243	81.64
161.29	81.97	161.327	81.63
161.373	81.96	161.41	81.62
161.456	81.96	161.493	81.61
161.54	81.95	161.577	81.61
161.623	81.94	161.66	81.6
161.706	81.93	161.743	81.59
161.79	81.93	161.827	81.61
161.873	81.92	161.91	81.6
161.956	81.91	161.993	81.59
162.04	81.9	162.076	81.59
162.124	81.89	162.16	81.58
162.206	81.89	162.243	81.57
162.29	81.88	162.327	81.56
162.373	81.87	162.41	81.55
162.456	81.86	162.493	81.55
162.54	81.86	162.577	81.54
162.623	81.85	162.66	81.53
162.706	81.84	162.743	81.52
162.79	81.83	162.826	81.52
162.873	81.82	162.91	81.51
162.957	81.82	162.993	81.5
163.04	81.81	163.077	81.49
163.123	81.79	163.16	81.49
163.207	81.79	163.243	81.48
163.29	81.78	163.326	81.47
163.373	81.78	163.41	81.47
163.456	81.77	163.493	81.46
163.54	81.76	163.576	81.45
163.623	81.75	163.66	81.45
163.706	81.74	163.743	81.42
163.79	81.74	163.826	81.41
163.873	81.72	163.91	81.4
163.956	81.72	163.993	81.39
164.04	81.71	164.077	81.39
164.123	81.7	164.16	81.38
164.206	81.69	164.243	81.38
164.29	81.68	164.327	81.37
164.373	81.67	164.41	81.36
164.457	81.66	164.493	81.36
164.54	81.65	164.577	81.36
164.623	81.64	164.66	81.36
164.706	81.63	164.743	81.36
164.79	81.62	164.826	81.35
164.873	81.61	164.91	81.35
164.956	81.61	164.993	81.34
165.04	81.6	165.077	81.34
165.123	81.58	165.16	81.33
165.206	81.58	165.243	81.32
165.29	81.57	165.327	81.31
165.373	81.56	165.41	81.3
165.456	81.55	165.493	81.29
165.542	81.54	165.576	81.28
165.623	81.53	165.659	81.27
165.706	81.52	165.742	81.27
165.79	81.52	165.826	81.26
165.873	81.51	165.909	81.24
165.957	81.5	165.992	81.23
166.04	81.49	166.076	81.23
166.123	81.49	166.159	81.22
166.206	81.49	166.242	81.21
166.29	81.49	166.326	81.2
166.373	81.49	166.409	81.19
166.456	81.49	166.492	81.19
166.54	81.48	166.576	81.18
166.623	81.47	166.659	81.17
166.706	81.46	166.742	81.16
[truncated: 6,029 more rows]
