# Supplementary material for: High-performance deep-blue phosphorescent organic light-emitting diodes enabled by a platinum(II) emitter
Source: Research Square preprint supplement (doi:10.21203/rs.3.rs-5009247/v1), 2024-09-09
Supplement: Supplementary file 10 [file Supplimentary Fig. 3.xlsx]

## Sheet: Sheet1
Thermogravimetric analysis (TGA) curves of sublimated PtQS1 measured under nitrogen atmosphere
44.2551	100.05
44.2551	100.051
44.3956	100.054
44.8552	100.059
45.5108	100.066
46.2075	100.071
46.8661	100.073
47.4894	100.075
48.0995	100.077
48.7177	100.079
49.359	100.082
50.0073	100.085
50.6547	100.088
51.3146	100.091
51.969	100.095
52.6201	100.098
53.2847	100.102
53.9466	100.106
54.6148	100.109
55.272	100.112
55.9285	100.114
56.5928	100.116
57.2431	100.116
57.9129	100.117
58.5713	100.116
59.2259	100.116
59.8801	100.116
60.5276	100.116
61.1793	100.115
61.8276	100.114
62.4698	100.113
63.1205	100.111
63.7553	100.111
64.4058	100.112
65.0496	100.113
65.6875	100.114
66.3237	100.118
66.9564	100.119
67.5963	100.121
68.2209	100.122
68.8522	100.122
69.477	100.123
70.1066	100.123
70.7327	100.124
71.3542	100.124
71.9827	100.124
72.5955	100.124
73.2066	100.124
73.8125	100.124
74.4184	100.124
75.0311	100.124
75.6285	100.124
76.2345	100.124
76.8443	100.124
77.446	100.125
78.0416	100.125
78.6401	100.125
79.2291	100.125
79.8191	100.125
80.4063	100.125
80.9983	100.126
81.5893	100.126
82.174	100.126
82.7555	100.126
83.3342	100.126
83.9181	100.126
84.4882	100.126
85.0627	100.127
85.6364	100.127
86.2186	100.127
86.7823	100.127
87.3458	100.127
87.9145	100.127
88.4894	100.127
89.0524	100.127
89.6202	100.127
90.172	100.127
90.7369	100.128
91.3023	100.128
91.8606	100.128
92.4237	100.128
92.9806	100.128
93.5324	100.128
94.0903	100.128
94.6379	100.128
95.1931	100.128
95.7439	100.127
96.2914	100.125
96.8396	100.122
97.3911	100.119
97.9357	100.117
98.4913	100.115
99.0277	100.112
99.5716	100.111
100.118	100.109
100.661	100.108
101.204	100.108
101.753	100.108
102.292	100.108
102.831	100.107
103.37	100.108
103.907	100.108
104.443	100.107
104.98	100.107
105.517	100.108
106.063	100.108
106.599	100.108
107.136	100.108
107.665	100.108
108.198	100.108
108.734	100.108
109.264	100.108
109.797	100.108
110.333	100.108
110.871	100.108
111.398	100.108
111.93	100.108
112.451	100.108
112.986	100.108
113.507	100.108
114.04	100.108
114.562	100.108
115.098	100.108
115.626	100.108
116.157	100.108
116.682	100.108
117.208	100.108
117.731	100.108
118.261	100.108
118.795	100.108
119.308	100.108
119.84	100.108
120.365	100.108
120.894	100.108
121.411	100.107
121.943	100.106
122.463	100.104
122.995	100.103
123.521	100.101
124.045	100.099
124.565	100.097
125.085	100.095
125.61	100.093
126.131	100.091
126.652	100.09
127.179	100.088
127.703	100.087
128.22	100.085
128.742	100.082
129.27	100.08
129.792	100.078
130.312	100.075
130.839	100.073
131.363	100.07
131.882	100.067
132.398	100.064
132.91	100.061
133.439	100.058
133.964	100.054
134.478	100.049
135.003	100.044
135.521	100.038
136.038	100.032
136.562	100.027
137.088	100.021
137.609	100.015
138.121	100.011
138.647	100.006
139.169	100.003
139.686	99.9989
140.208	99.995
140.728	99.9909
141.251	99.987
141.76	99.9831
142.285	99.9792
142.796	99.9753
143.315	99.9719
143.835	99.9682
144.352	99.9647
144.87	99.961
145.388	99.9576
145.903	99.9537
146.429	99.9498
146.942	99.9459
147.457	99.9418
147.982	99.9379
148.498	99.934
149.01	99.9301
149.535	99.9266
150.054	99.9229
150.574	99.9195
151.09	99.9162
151.608	99.9132
152.123	99.91
152.637	99.9069
153.152	99.9039
153.667	99.9009
154.186	99.8978
154.692	99.8948
155.215	99.8918
155.735	99.8885
156.254	99.8853
156.773	99.882
157.29	99.8788
157.81	99.8751
158.318	99.8717
158.844	99.8682
159.353	99.8645
159.868	99.8608
160.384	99.8574
160.895	99.8537
161.418	99.8504
161.936	99.847
162.443	99.8435
162.961	99.8403
163.468	99.8368
163.99	99.8333
164.5	99.8299
165.019	99.8264
165.532	99.8229
166.047	99.8193
166.563	99.8158
167.084	99.8121
167.603	99.8082
168.112	99.8041
168.629	99.8
169.14	99.7961
169.661	99.792
170.175	99.7879
170.69	99.7842
171.203	99.7807
171.72	99.7775
172.231	99.7751
172.745	99.7723
173.266	99.7695
173.776	99.7669
174.294	99.7643
174.813	99.7617
175.323	99.7591
175.844	99.7567
176.36	99.7548
176.868	99.7528
177.383	99.7511
177.901	99.7494
178.414	99.7481
178.925	99.7463
179.443	99.7444
179.951	99.7424
180.469	99.74
180.98	99.7379
181.491	99.7357
182.004	99.7335
182.529	99.7299
183.042	99.726
183.559	99.7225
184.072	99.7188
184.589	99.7145
185.101	99.7113
185.614	99.7084
186.131	99.7056
186.645	99.7041
187.155	99.7019
187.665	99.6996
188.186	99.6974
188.696	99.695
189.206	99.6929
189.726	99.6909
190.237	99.6892
190.75	99.6881
191.27	99.6868
191.783	99.6853
192.294	99.6833
192.807	99.6805
193.327	99.6777
193.833	99.6751
194.348	99.6723
194.858	99.6686
195.375	99.6658
195.886	99.6634
196.404	99.6608
196.911	99.6593
197.425	99.6571
197.94	99.6548
198.457	99.6526
198.973	99.6502
199.482	99.6483
199.994	99.6465
200.51	99.645
201.022	99.6442
201.541	99.6433
202.051	99.6426
202.566	99.642
203.067	99.6418
203.592	99.6416
204.11	99.6413
204.622	99.6411
205.127	99.6413
205.638	99.6413
206.149	99.6413
206.669	99.6411
207.178	99.6413
207.697	99.6413
208.204	99.6413
208.724	99.6413
209.232	99.6413
209.745	99.6416
210.258	99.6416
210.77	99.6416
211.29	99.6416
211.796	99.6409
212.313	99.6394
212.819	99.6375
213.337	99.6344
213.841	99.6318
214.352	99.6296
214.863	99.6273
215.384	99.6251
215.897	99.6236
216.409	99.6223
216.922	99.6212
217.436	99.6214
217.948	99.621
218.457	99.6208
218.966	99.6206
219.482	99.6206
219.987	99.6206
220.502	99.6206
221.007	99.6206
221.524	99.6204
222.04	99.6193
222.545	99.6173
223.06	99.6149
223.564	99.6117
224.072	99.6091
224.592	99.6069
225.101	99.6048
225.614	99.6033
226.125	99.602
226.633	99.6009
227.144	99.6
227.66	99.6002
228.172	99.6002
228.682	99.6004
229.201	99.6009
229.711	99.6022
230.217	99.6037
230.724	99.6052
231.232	99.6069
231.742	99.6093
232.253	99.6115
232.769	99.6132
233.281	99.6149
233.793	99.6162
234.297	99.6175
234.815	99.6186
235.322	99.6195
235.831	99.6182
236.349	99.6165
236.853	99.6145
237.37	99.6125
237.879	99.6087
238.39	99.6061
238.902	99.6041
239.416	99.6026
239.92	99.6022
240.435	99.6015
240.948	99.6011
241.459	99.6004
241.97	99.6007
242.476	99.6007
242.987	99.6004
243.501	99.6004
244.008	99.6004
244.519	99.6004
245.03	99.6004
245.535	99.6004
246.049	99.6007
246.556	99.6007
247.065	99.6007
247.575	99.6007
248.09	99.6009
248.602	99.6011
249.112	99.6017
249.625	99.6026
250.129	99.6041
250.634	99.6056
251.14	99.6063
251.656	99.6063
252.161	99.6061
252.673	99.6054
253.183	99.605
253.685	99.6043
254.197	99.6026
254.705	99.6017
255.211	99.6011
255.722	99.6007
256.234	99.6011
256.746	99.6011
257.256	99.6009
257.764	99.6009
258.274	99.6011
258.775	99.6011
259.28	99.6011
259.798	99.6013
260.306	99.6013
260.811	99.6013
261.307	99.6013
261.822	99.6013
262.328	99.6007
262.84	99.5989
263.341	99.5968
263.85	99.5944
264.361	99.5911
264.87	99.589
265.373	99.5875
265.885	99.5864
266.388	99.5872
266.908	99.5879
267.419	99.5887
267.925	99.59
268.431	99.5926
268.945	99.5944
269.451	99.5959
269.958	99.5974
270.473	99.5981
270.983	99.5978
271.486	99.5965
271.987	99.595
272.497	99.592
273.008	99.5896
273.512	99.5877
274.025	99.5857
274.534	99.5842
275.044	99.5827
275.552	99.5818
276.058	99.5807
276.565	99.581
277.073	99.5807
277.582	99.5805
278.091	99.5803
278.6	99.5805
279.108	99.5807
279.615	99.5812
280.124	99.5816
280.632	99.5829
281.136	99.5844
281.651	99.5859
282.157	99.5875
282.66	99.59
283.171	99.592
283.682	99.5939
284.183	99.5957
284.692	99.5965
285.194	99.5965
285.707	99.5954
286.215	99.5942
286.718	99.5911
287.222	99.589
287.734	99.5872
288.248	99.5855
288.754	99.5842
289.258	99.5831
289.763	99.582
290.272	99.5814
290.784	99.5816
291.278	99.5814
291.787	99.5812
292.291	99.581
292.806	99.5807
293.311	99.5794
293.813	99.5773
294.323	99.5751
294.833	99.5717
295.332	99.5691
295.848	99.5669
296.356	99.5647
296.86	99.5634
297.362	99.5621
297.874	99.5615
298.379	99.561
298.881	99.5621
299.397	99.563
299.895	99.5641
300.397	99.5656
300.907	99.568
301.417	99.5699
301.923	99.5719
302.421	99.5736
302.936	99.5753
303.44	99.5768
303.946	99.5779
304.449	99.5792
304.954	99.5794
305.464	99.5799
305.969	99.5797
306.472	99.5786
306.981	99.576
307.483	99.5736
307.985	99.5714
308.496	99.5693
309.002	99.566
309.507	99.5639
310.009	99.5623
310.519	99.561
311.026	99.5613
311.527	99.5608
312.041	99.5604
312.541	99.5602
313.043	99.5602
313.544	99.5602
314.058	99.5593
314.561	99.5578
315.064	99.555
315.573	99.5526
316.075	99.5502
316.582	99.5478
317.087	99.5446
317.589	99.5426
318.097	99.5409
318.606	99.5396
319.11	99.5398
319.612	99.5394
320.113	99.539
320.628	99.5387
321.127	99.539
321.636	99.5392
322.139	99.5396
322.647	99.5403
323.148	99.5418
323.65	99.5433
324.153	99.5448
324.661	99.5468
325.169	99.5487
325.669	99.5494
326.173	99.5489
326.678	99.5485
327.181	99.5461
327.69	99.5448
328.195	99.5435
328.696	99.5424
329.202	99.5411
329.702	99.5403
330.203	99.5396
330.711	99.5392
331.222	99.5394
331.728	99.5392
332.226	99.539
332.733	99.539
333.238	99.539
333.744	99.539
334.246	99.539
334.749	99.539
335.256	99.5387
335.761	99.5377
336.265	99.5355
336.772	99.5333
337.272	99.5301
337.773	99.5275
338.273	99.5251
338.785	99.5232
339.294	99.5214
339.794	99.5201
340.295	99.519
340.799	99.5182
341.305	99.5184
341.81	99.5182
342.313	99.518
342.819	99.5178
343.321	99.5175
343.83	99.5169
344.332	99.5152
344.835	99.513
345.334	99.51
345.846	99.5078
346.349	99.5058
346.852	99.5043
347.354	99.5039
347.857	99.5037
348.364	99.5041
348.863	99.5048
349.366	99.5076
349.872	99.5091
350.369	99.5106
350.877	99.5121
351.38	99.5132
351.886	99.5132
352.383	99.5123
352.892	99.511
353.392	99.508
353.895	99.5058
354.397	99.5039
354.901	99.5022
355.407	99.5004
355.911	99.4989
356.411	99.4978
356.91	99.497
357.412	99.4972
357.919	99.497
358.427	99.4965
358.924	99.4961
359.424	99.4942
359.936	99.492
360.435	99.4894
360.936	99.487
361.445	99.4831
361.942	99.4805
362.444	99.4779
362.947	99.4749
363.443	99.4721
363.953	99.469
364.454	99.466
364.958	99.4632
365.462	99.46
365.963	99.4578
366.463	99.4561
366.965	99.4545
367.465	99.4548
367.972	99.4543
368.474	99.4537
368.981	99.4524
369.478	99.45
369.978	99.4474
370.479	99.445
370.983	99.4424
371.478	99.4387
371.978	99.4364
372.483	99.4346
372.978	99.4333
373.482	99.434
373.981	99.434
374.48	99.4335
374.982	99.4325
375.485	99.432
375.981	99.4314
376.48	99.4309
376.985	99.4305
377.486	99.4299
377.985	99.4292
378.491	99.4279
378.992	99.426
379.488	99.4236
379.988	99.4214
380.485	99.4193
380.991	99.4171
381.487	99.4128
381.995	99.4089
382.497	99.4052
382.993	99.4017
383.491	99.397
383.995	99.3924
384.503	99.3879
385.001	99.3833
385.505	99.3796
386.008	99.376
386.51	99.3723
387.014	99.3684
387.511	99.3649
388.017	99.3613
388.513	99.3578
389.008	99.3543
389.513	99.3494
390.014	99.3448
390.519	99.3407
391.022	99.3368
391.527	99.3329
392.027	99.3288
392.53	99.3247
393.03	99.3204
393.531	99.3171
394.036	99.3139
394.537	99.3108
395.036	99.3082
395.538	99.305
396.04	99.3013
396.538	99.2976
397.037	99.2942
397.543	99.2896
398.047	99.2851
398.549	99.2805
399.046	99.2762
399.547	99.271
400.044	99.2656
400.544	99.2602
401.046	99.2548
401.548	99.2481
402.053	99.2418
402.548	99.2355
403.041	99.229
403.528	99.2223
404.015	99.216
404.506	99.2093
405.007	99.2026
405.513	99.1963
406.021	99.19
406.524	99.1835
407.033	99.1771
407.54	99.171
408.048	99.1645
408.545	99.1578
409.048	99.1511
409.549	99.1437
410.044	99.1364
410.535	99.1288
411.015	99.1208
411.474	99.1117
411.909	99.1022
412.323	99.0922
412.725	99.0823
413.141	99.0708
413.581	99.0602
414.054	99.0502
414.561	99.0403
415.088	99.031
415.608	99.0214
416.141	99.0119
416.671	99.0026
417.192	98.9937
417.716	98.9844
418.24	98.9747
418.756	98.9647
419.276	98.9539
419.794	98.9431
420.301	98.932
420.82	98.921
421.332	98.9087
421.847	98.8963
422.363	98.884
422.876	98.8714
423.382	98.8582
423.892	98.8454
424.405	98.8329
424.917	98.8204
425.422	98.8082
425.932	98.7965
426.437	98.7846
426.942	98.7725
427.452	98.761
427.957	98.7491
428.465	98.7364
428.97	98.7236
429.471	98.7095
429.981	98.6952
430.486	98.6807
430.986	98.6658
431.494	98.6489
432.001	98.632
432.501	98.6147
433.003	98.5972
433.505	98.5773
434.007	98.5578
434.508	98.5383
435.017	98.5184
435.514	98.497
436.02	98.4758
436.518	98.4545
437.019	98.4331
437.517	98.4108
438.019	98.3883
438.519	98.3656
439.02	98.3426
439.519	98.3186
440.016	98.2948
440.519	98.2708
441.022	98.2465
441.523	98.2208
442.024	98.195
442.523	98.1688
443.027	98.1424
443.52	98.1145
444.024	98.087
444.511	98.0593
445.014	98.0316
445.514	98.0028
446.014	97.9738
446.516	97.9444
447.012	97.9147
447.513	97.8831
448.014	97.8517
448.507	97.8197
449.002	97.787
449.505	97.7515
450.001	97.7162
450.501	97.6801
450.997	97.6431
451.491	97.6026
451.996	97.5628
452.498	97.5223
452.994	97.4814
453.486	97.4374
453.985	97.3944
454.487	97.3509
454.99	97.3067
455.484	97.2604
455.981	97.2143
456.478	97.1675
456.977	97.1204
457.47	97.0704
457.97	97.0208
458.469	96.9708
458.965	96.9199
459.46	96.8662
459.965	96.813
460.459	96.7589
460.956	96.7043
461.457	96.6467
461.955	96.5896
462.451	96.5316
462.95	96.4727
463.442	96.4108
463.939	96.3491
464.433	96.2866
464.93	96.2232
465.428	96.1563
465.926	96.0898
466.426	96.0225
466.92	95.9548
467.42	95.8833
467.919	95.8126
468.412	95.7413
468.903	95.6693
469.403	95.5939
469.895	95.5186
470.398	95.4422
470.894	95.3647
471.391	95.2825
471.888	95.2002
472.386	95.1165
472.877	95.0314
473.371	94.9403
473.871	94.8507
474.367	94.7604
474.862	94.669
475.358	94.5729
475.853	94.4775
476.352	94.3814
476.848	94.2844
477.345	94.1827
477.836	94.0816
478.333	93.9797
478.828	93.8766
479.324	93.7684
479.822	93.6606
480.317	93.5517
480.815	93.442
481.306	93.3262
481.807	93.2113
482.308	93.0952
482.8	92.9781
483.298	92.8558
483.793	92.7342
484.285	92.6117
484.787	92.4883
485.285	92.3595
485.78	92.231
486.274	92.1009
486.766	91.9693
487.263	91.8312
487.754	91.6939
488.252	91.5552
488.753	91.4151
489.25	91.268
489.748	91.1219
490.246	90.974
490.729	90.8249
491.225	90.6686
491.726	90.5134
492.226	90.3565
492.722	90.1983
493.209	90.0329
493.71	89.8686
494.199	89.7024
494.694	89.5349
495.183	89.36
495.682	89.1857
496.18	89.01
496.671	88.8325
497.161	88.6467
497.663	88.4621
498.152	88.2758
498.657	88.0879
499.15	87.8922
499.642	87.6978
500.135	87.5015
500.632	87.3035
501.128	87.0972
501.621	86.8911
502.119	86.6827
502.619	86.4721
503.119	86.2513
503.611	86.032
504.111	85.811
504.608	85.5883
505.1	85.3563
505.596	85.1258
506.096	84.8942
506.589	84.6613
507.089	84.4208
507.577	84.1814
508.073	83.94
508.579	83.6967
509.071	83.4467
509.566	83.1976
510.057	82.9467
510.556	82.6948
511.053	82.4357
511.549	82.1779
512.051	81.919
512.549	81.6589
513.05	81.3918
513.555	81.1236
514.058	80.8517
514.557	80.5766
515.063	80.2851
515.562	79.9918
516.064	79.6916
516.576	79.3862
517.072	79.0541
517.574	78.7266
518.072	78.3952
518.575	78.06
519.074	77.7043
519.584	77.3548
520.081	77.003
520.586	76.6489
521.086	76.2831
521.592	75.9188
522.092	75.5524
522.597	75.1842
523.092	74.805
523.596	74.4279
524.102	74.0491
524.596	73.6686
525.102	73.2794
525.599	72.8913
526.1	72.5019
526.601	72.1108
527.103	71.7119
527.603	71.3145
528.103	70.916
528.603	70.5165
529.096	70.1123
529.591	69.7106
530.092	69.3093
530.585	68.908
531.082	68.5067
531.594	68.1054
532.096	67.7048
532.595	67.3041
533.092	66.905
533.587	66.5063
534.077	66.1087
534.571	65.7121
535.062	65.3199
535.556	64.9286
536.049	64.5398
536.54	64.153
537.033	63.7768
537.522	63.4015
538.011	63.0314
538.505	62.666
538.997	62.3234
539.492	61.9836
539.986	61.6539
540.475	61.3331
540.969	61.0478
541.466	60.7517
541.962	60.4853
542.459	60.2472
542.953	60.037
543.453	59.8229
543.955	59.6201
544.451	59.4264
544.951	59.2755
545.456	59.1156
545.947	58.9613
546.442	58.8128
546.951	58.6946
547.45	58.568
547.947	58.4439
548.45	58.3232
548.944	58.2184
549.446	58.1095
549.949	58.0022
550.447	57.8965
550.951	57.8
551.451	57.7011
551.949	57.6028
552.441	57.5056
552.94	57.413
553.438	57.3188
553.943	57.2249
554.436	57.1309
554.932	57.0385
555.434	56.9457
555.931	56.853
556.429	56.7604
556.925	56.6688
557.427	56.5777
557.93	56.4872
558.424	56.3972
558.927	56.31
559.419	56.2225
559.923	56.1357
560.426	56.0493
560.92	55.9665
561.425	55.8825
561.924	55.7991
562.427	55.7162
562.925	55.6357
563.43	55.5554
563.925	55.476
564.435	55.397
564.935	55.3216
565.439	55.2454
565.941	55.1699
566.437	55.0948
566.94	55.0229
567.436	54.9504
567.937	54.8783
568.434	54.8074
568.937	54.7392
569.442	54.6714
569.947	54.6048
570.448	54.539
570.945	54.4783
571.448	54.4175
571.943	54.3576
572.447	54.2989
572.949	54.2459
573.446	54.192
573.951	54.1394
574.453	54.0874
574.952	54.0409
575.45	53.9931
575.948	53.9457
576.45	53.8989
576.946	53.8556
577.446	53.8115
577.952	53.7675
578.449	53.7242
578.951	53.6831
579.45	53.6424
579.954	53.6024
580.451	53.5632
580.948	53.5277
581.452	53.492
581.95	53.4574
582.448	53.4236
582.95	53.3939
583.447	53.3636
583.951	53.3338
584.445	53.3045
584.94	53.2781
585.441	53.2507
585.939	53.2234
586.434	53.1965
586.926	53.1712
587.435	53.1459
587.933	53.121
588.435	53.0965
588.93	53.0747
589.421	53.0528
589.922	53.0316
590.419	53.011
590.911	52.9933
591.413	52.9751
591.908	52.9569
592.399	52.939
592.906	52.9229
593.402	52.9061
593.895	52.8892
594.396	52.8727
594.886	52.8567
595.384	52.8407
595.88	52.8247
596.376	52.8091
596.87	52.7944
597.368	52.7796
597.866	52.7651
598.366	52.7511
598.86	52.7377
599.352	52.724
599.849	52.71
600.345	52.6961
600.84	52.6814
601.335	52.6669
601.833	52.6524
602.323	52.6381
602.82	52.6236
603.318	52.6097
603.812	52.5972
604.303	52.5849
604.795	52.5745
605.292	52.5634
605.793	52.5528
606.288	52.5424
606.783	52.5331
607.282	52.5236
607.779	52.5141
608.282	52.5046
608.768	52.4954
609.261	52.4864
609.761	52.4773
610.258	52.4684
610.75	52.4593
611.246	52.4504
611.742	52.442
612.234	52.4333
612.732	52.4245
613.232	52.416
613.729	52.408
614.221	52.3996
614.721	52.3916
615.211	52.3829
615.704	52.3738
616.203	52.3647
616.7	52.3543
617.186	52.3444
617.685	52.334
618.19	52.3236
618.687	52.3128
619.179	52.3022
619.671	52.2918
620.169	52.2816
620.664	52.2719
621.163	52.2615
621.658	52.2513
622.151	52.2409
622.642	52.2307
623.14	52.221
623.64	52.2113
624.129	52.2017
624.634	52.1942
625.123	52.1864
625.615	52.1784
626.11	52.1708
626.603	52.1651
627.101	52.1587
627.598	52.1519
628.088	52.1454
628.589	52.139
629.087	52.1322
629.575	52.1253
630.07	52.1182
630.567	52.1102
631.063	52.1024
631.559	52.0946
632.055	52.0864
632.548	52.0777
633.042	52.0697
633.535	52.0619
634.027	52.0539
634.521	52.0463
635.021	52.0394
635.52	52.0329
636.014	52.0266
636.513	52.021
637.009	52.0151
637.5	52.0091
637.996	52.003
638.494	51.9959
638.989	51.9887
639.48	51.9809
639.979	51.9727
640.477	51.9632
640.963	51.9541
641.461	51.9452
641.958	51.9368
642.458	51.9288
642.95	51.9206
643.451	51.9123
643.943	51.9046
644.441	51.8967
644.939	51.8885
645.433	51.8801
645.934	51.8719
646.425	51.8621
646.925	51.8535
647.425	51.8457
647.916	51.8379
648.415	51.8301
648.913	51.8221
649.411	51.8147
649.909	51.8074
650.401	51.7998
650.893	51.7922
651.391	51.7844
651.881	51.776
652.382	51.7673
652.88	51.7593
653.374	51.7515
653.874	51.7435
654.366	51.7357
654.854	51.7283
655.357	51.721
655.859	51.7143
656.355	51.7082
656.847	51.7028
657.34	51.6978
657.834	51.6939
658.332	51.6907
