# Supplementary material for: High-performance deep-blue phosphorescent organic light-emitting diodes enabled by a platinum(II) emitter
Source: Research Square preprint supplement (doi:10.21203/rs.3.rs-5009247/v1), 2024-09-09
Supplement: Supplementary file 13 [file Supplimentary Fig. 5.xlsx]

## Sheet: Sheet1
PL in n-hexane (1.9)		PL in tert-butylbenzene (2.38)		PL in toluene (2.4)		PL in butyl ether (3.08)		PL inisopropyl ether (3.88)		PL in ethyl ether (4.33)		PL in ethyl acetate (6.4)		PL in diethylene glycol dimethyl ether (7.30)		PL in tetrahydrofuran (7.58)		PL in dichloromethane (8.93)		PL in acetone (21.4)		PL in ethanol (24.5)		PL in methanol (32.6)		PL in N,N-Dimethylformamide (36.71)		PL in acetonitrile (38.8)
380.6	0.00028717	380.6	0.00195	380.6		380.6	0.000109921	380.6	0.00236	380.6	0.00158	380.6	0.000500958	380.6	0.000147131	380.6	0.00202	380.6	0.00698	380.6	0.000797335	380.6	0.000262575	380.6	0.000304023	380.6	0.000343435	380.6	0.001
380.8	0.00028717	380.8	0.00194	380.8		380.8	0.000109921	380.8	0.00236	380.8	0.00158	380.8	0.000500958	380.8	0.000158646	380.8	0.00219	380.8	0.00703	380.8	0.000799728	380.8	0.000262575	380.8	0.000304023	380.8	0.000333168	380.8	0.00101
381	0.000294266	381	0.0019	381		381	0.000109921	381	0.00245	381	0.00158	381	0.000500958	381	0.000158646	381	0.00221	381	0.00707	381	0.000804296	381	0.000262575	381	0.000324508	381	0.000321777	381	0.00101
381.2	0.000294266	381.2	0.0019	381.2		381.2	0.000109921	381.2	0.0025	381.2	0.00159	381.2	0.00049818	381.2	0.000158646	381.2	0.00222	381.2	0.00716	381.2	0.000835406	381.2	0.000262575	381.2	0.000328233	381.2	0.000321777	381.2	0.00101
381.4	0.00029844	381.4	0.0019	381.4		381.4	0.000104633	381.4	0.00252	381.4	0.00162	381.4	0.000501884	381.4	0.000158646	381.4	0.00223	381.4	0.00721	381.4	0.000842151	381.4	0.000280821	381.4	0.00032963	381.4	0.000314182	381.4	0.00102
381.6	0.00030011	381.6	0.0019	381.6		381.6	0.000104633	381.6	0.00267	381.6	0.00165	381.6	0.000501884	381.6	0.000153315	381.6	0.00228	381.6	0.00731	381.6	0.000885661	381.6	0.000280821	381.6	0.00032963	381.6	0.000313057	381.6	0.00102
381.8	0.00030011	381.8	0.0019	381.8		381.8	0.000104633	381.8	0.00273	381.8	0.00168	381.8	0.000501884	381.8	0.000153315	381.8	0.00231	381.8	0.00736	381.8	0.000916989	381.8	0.000280821	381.8	0.000374325	381.8	0.000311651	381.8	0.00104
382	0.00029844	382	0.00191	382		382	0.000104633	382	0.00274	382	0.00176	382	0.000448177	382	0.000153315	382	0.00234	382	0.00743	382	0.000922645	382	0.000280821	382	0.000407381	382	0.000311651	382	0.00104
382.2	0.00029844	382.2	0.00195	382.2		382.2	0.000104633	382.2	0.00274	382.2	0.00177	382.2	0.000448177	382.2	0.000148411	382.2	0.00236	382.2	0.00748	382.2	0.000922645	382.2	0.000280821	382.2	0.000407381	382.2	0.000311651	382.2	0.00104
382.4	0.000285501	382.4	0.00195	382.4		382.4	0.000104633	382.4	0.00274	382.4	0.00179	382.4	0.000510218	382.4	0.000146278	382.4	0.0024	382.4	0.00754	382.4	0.000922645	382.4	0.000269181	382.4	0.000407381	382.4	0.000311651	382.4	0.00104
382.6	0.000268805	382.6	0.00195	382.6		382.6	0.000115398	382.6	0.00274	382.6	0.00179	382.6	0.000534294	382.6	0.000153315	382.6	0.00241	382.6	0.00765	382.6	0.000945924	382.6	0.000266874	382.6	0.000407381	382.6	0.000311651	382.6	0.00104
382.8	0.00025837	382.8	0.00191	382.8		382.8	0.000122009	382.8	0.00275	382.8	0.00179	382.8	0.00053985	382.8	0.000153528	382.8	0.00253	382.8	0.00772	382.8	0.000922645	382.8	0.00026635	382.8	0.000397138	382.8	0.000330074	382.8	0.00104
383	0.000245013	383	0.00186	383		383	0.000134285	383	0.00282	383	0.00179	383	0.000534294	383	0.000154808	383	0.00261	383	0.00783	383	0.000921558	383	0.000266874	383	0.000387361	383	0.000330496	383	0.00102
383.2	0.000238335	383.2	0.00186	383.2		383.2	0.000136174	383.2	0.00289	383.2	0.00176	383.2	0.000534294	383.2	0.000161418	383.2	0.00262	383.2	0.00794	383.2	0.000921558	383.2	0.00026635	383.2	0.000380843	383.2	0.000330496	383.2	0.001
383.4	0.000238335	383.4	0.00186	383.4		383.4	0.000139951	383.4	0.00292	383.4	0.00176	383.4	0.000534294	383.4	0.000161418	383.4	0.00266	383.4	0.00799	383.4	0.000921558	383.4	0.000266769	383.4	0.000372928	383.4	0.000337669	383.4	0.000998364
383.6	0.000238335	383.6	0.00186	383.6		383.6	0.00014354	383.6	0.00301	383.6	0.00176	383.6	0.000575037	383.6	0.000161418	383.6	0.0027	383.6	0.00803	383.6	0.000930695	383.6	0.000266769	383.6	0.000340803	383.6	0.000338091	383.6	0.000980281
383.8	0.000238335	383.8	0.00187	383.8		383.8	0.00014354	383.8	0.00301	383.8	0.00176	383.8	0.000586149	383.8	0.000161418	383.8	0.00272	383.8	0.00808	383.8	0.000930695	383.8	0.000266769	383.8	0.000327302	383.8	0.000339497	383.8	0.000970892
384	0.000250439	384	0.00192	384		384	0.000144673	384	0.00298	384	0.00176	384	0.000597261	384	0.000157153	384	0.00277	384	0.00814	384	0.000921558	384	0.000271068	384	0.000317524	384	0.000337669	384	0.000970892
384.2	0.000275901	384.2	0.00197	384.2		384.2	0.000144673	384.2	0.00298	384.2	0.00178	384.2	0.000597261	384.2	0.000157153	384.2	0.00278	384.2	0.0082	384.2	0.000915684	384.2	0.000272746	384.2	0.000317059	384.2	0.000337669	384.2	0.000980281
384.4	0.000275901	384.4	0.00199	384.4		384.4	0.000144862	384.4	0.00306	384.4	0.00185	384.4	0.000600039	384.4	0.000153955	384.4	0.00282	384.4	0.00827	384.4	0.000910027	384.4	0.000273795	384.4	0.000314265	384.4	0.000336966	384.4	0.000980281
384.6	0.000275901	384.6	0.00199	384.6		384.6	0.000144862	384.6	0.00307	384.6	0.00185	384.6	0.000613003	384.6	0.000153955	384.6	0.00284	384.6	0.00836	384.6	0.000908287	384.6	0.000273795	384.6	0.000297505	384.6	0.000336966	384.6	0.000991757
384.8	0.000268387	384.8	0.00199	384.8		384.8	0.000145995	384.8	0.00307	384.8	0.00187	384.8	0.000675044	384.8	0.000148837	384.8	0.00292	384.8	0.00848	384.8	0.000904153	384.8	0.000273795	384.8	0.000297505	384.8	0.000336966	384.8	0.00102
385	0.000250439	385	0.00199	385		385	0.000144862	385	0.00322	385	0.00189	385	0.000725047	385	0.000147771	385	0.00292	385	0.00856	385	0.000883268	385	0.000273795	385	0.000303092	385	0.000336966	385	0.00102
385.2	0.000247517	385.2	0.00199	385.2		385.2	0.000144862	385.2	0.00324	385.2	0.00187	385.2	0.000725047	385.2	0.000140947	385.2	0.00294	385.2	0.00862	385.2	0.000867387	385.2	0.000271173	385.2	0.000300298	385.2	0.000336403	385.2	0.00104
385.4	0.000237082	385.4	0.00199	385.4		385.4	0.000144862	385.4	0.00328	385.4	0.0019	385.4	0.000756531	385.4	0.000137322	385.4	0.00295	385.4	0.00868	385.4	0.000867387	385.4	0.000269076	385.4	0.000297505	385.4	0.000336403	385.4	0.00105
385.6	0.000204108	385.6	0.00199	385.6		385.6	0.000139007	385.6	0.00328	385.6	0.0019	385.6	0.000756531	385.6	0.000137322	385.6	0.00302	385.6	0.00875	385.6	0.000864776	385.6	0.000266245	385.6	0.000292383	385.6	0.000336403	385.6	0.0011
385.8	0.000171551	385.8	0.00201	385.8		385.8	0.000137685	385.8	0.00328	385.8	0.00191	385.8	0.000756531	385.8	0.000137322	385.8	0.00303	385.8	0.00878	385.8	0.000867387	385.8	0.00025429	385.8	0.000292383	385.8	0.000336825	385.8	0.0011
386	0.000164038	386	0.00203	386		386	0.000135041	386	0.00324	386	0.00192	386	0.000678748	386	0.000136683	386	0.00304	386	0.00886	386	0.000864776	386	0.00025429	386	0.000300298	386	0.000336825	386	0.0011
386.2	0.000162368	386.2	0.00203	386.2		386.2	0.000135041	386.2	0.00319	386.2	0.00193	386.2	0.000668562	386.2	0.000137322	386.2	0.00309	386.2	0.00892	386.2	0.000862818	386.2	0.000266245	386.2	0.000300298	386.2	0.000326699	386.2	0.0011
386.4	0.000162368	386.4	0.00203	386.4		386.4	0.000135041	386.4	0.00319	386.4	0.00193	386.4	0.000620411	386.4	0.000143293	386.4	0.00312	386.4	0.00899	386.4	0.000862818	386.4	0.00025429	386.4	0.000292383	386.4	0.000326137	386.4	0.0011
386.6	0.000162368	386.6	0.00203	386.6		386.6	0.000139007	386.6	0.00319	386.6	0.00198	386.6	0.000606521	386.6	0.000145639	386.6	0.00313	386.6	0.00902	386.6	0.000862818	386.6	0.000252403	386.6	0.000292383	386.6	0.000326137	386.6	0.00113
386.8	0.000164038	386.8	0.002	386.8		386.8	0.000156194	386.8	0.00319	386.8	0.00202	386.8	0.000606521	386.8	0.000172506	386.8	0.00314	386.8	0.0091	386.8	0.000861948	386.8	0.000252403	386.8	0.000300764	386.8	0.000306026	386.8	0.00119
387	0.000180316	387	0.00199	387		387	0.000156194	387	0.00337	387	0.00202	387	0.000606521	387	0.000172506	387	0.00326	387	0.00915	387	0.000828227	387	0.000252403	387	0.000304023	387	0.000306026	387	0.00119
387.2	0.000181568	387.2	0.00199	387.2		387.2	0.000156194	387.2	0.00338	387.2	0.00203	387.2	0.000620411	387.2	0.000172506	387.2	0.00326	387.2	0.00918	387.2	0.000823441	387.2	0.000258799	387.2	0.000321715	387.2	0.000306026	387.2	0.00119
387.4	0.000195343	387.4	0.00199	387.4		387.4	0.000156194	387.4	0.00338	387.4	0.00203	387.4	0.000668562	387.4	0.000172506	387.4	0.00331	387.4	0.00923	387.4	0.000823441	387.4	0.000264462	387.4	0.000321715	387.4	0.000306026	387.4	0.00123
387.6	0.000203273	387.6	0.002	387.6		387.6	0.000151283	387.6	0.00341	387.6	0.00205	387.6	0.000670414	387.6	0.000169094	387.6	0.00332	387.6	0.00928	387.6	0.00081822	387.6	0.000264462	387.6	0.000304488	387.6	0.000322199	387.6	0.00123
387.8	0.000212456	387.8	0.00203	387.8		387.8	0.000146184	387.8	0.00356	387.8	0.00209	387.8	0.000715787	387.8	0.000165256	387.8	0.00338	387.8	0.00931	387.8	0.000816914	387.8	0.000282289	387.8	0.000321715	387.8	0.000337669	387.8	0.00123
388	0.000223308	388	0.00215	388		388	0.000146184	388	0.00363	388	0.00212	388	0.000730603	388	0.000160138	388	0.00352	388	0.00935	388	0.000807777	388	0.000283023	388	0.000321715	388	0.000340622	388	0.0013
388.2	0.000239587	388.2	0.00215	388.2		388.2	0.000146184	388.2	0.00363	388.2	0.00212	388.2	0.000763012	388.2	0.000155021	388.2	0.00352	388.2	0.00942	388.2	0.000815391	388.2	0.000283023	388.2	0.000344528	388.2	0.000362843	388.2	0.00134
388.4	0.000246265	388.4	0.00215	388.4		388.4	0.000148639	388.4	0.00363	388.4	0.00212	388.4	0.000763012	388.4	0.00014905	388.4	0.00352	388.4	0.00943	388.4	0.000801903	388.4	0.000283023	388.4	0.000321715	388.4	0.000372125	388.4	0.00141
388.6	0.000246265	388.6	0.00215	388.6		388.6	0.000148639	388.6	0.00364	388.6	0.00209	388.6	0.000730603	388.6	0.00014905	388.6	0.00355	388.6	0.00948	388.6	0.000800163	388.6	0.000283023	388.6	0.000326836	388.6	0.000373391	388.6	0.00144
388.8	0.000246265	388.8	0.00223	388.8		388.8	0.000154116	388.8	0.00364	388.8	0.00209	388.8	0.000726899	388.8	0.000155021	388.8	0.00352	388.8	0.00948	388.8	0.000793419	388.8	0.000283023	388.8	0.000321249	388.8	0.000373391	388.8	0.0015
389	0.000239587	389	0.00223	389		389	0.000154116	389	0.00364	389	0.00209	389	0.000715787	389	0.000155021	389	0.00355	389	0.0095	389	0.000793419	389	0.000279772	389	0.000326836	389	0.000373391	389	0.00156
389.2	0.000231239	389.2	0.00224	389.2		389.2	0.000154116	389.2	0.00364	389.2	0.00209	389.2	0.000707453	389.2	0.000159499	389.2	0.00355	389.2	0.00953	389.2	0.000787327	389.2	0.000279772	389.2	0.000321249	389.2	0.000373391	389.2	0.00157
389.4	0.000231239	389.4	0.00225	389.4		389.4	0.000148639	389.4	0.00361	389.4	0.00209	389.4	0.000703749	389.4	0.000171866	389.4	0.00355	389.4	0.00956	389.4	0.000787327	389.4	0.000279772	389.4	0.000326836	389.4	0.000373391	389.4	0.0016
389.6	0.000231239	389.6	0.00225	389.6		389.6	0.000154683	389.6	0.00353	389.6	0.00213	389.6	0.000644486	389.6	0.000172079	389.6	0.00364	389.6	0.00959	389.6	0.000787327	389.6	0.000282708	389.6	0.000326836	389.6	0.000373391	389.6	0.0016
389.8	0.000206195	389.8	0.00225	389.8		389.8	0.000154683	389.8	0.00329	389.8	0.00213	389.8	0.000644486	389.8	0.000172079	389.8	0.00366	389.8	0.0096	389.8	0.000787327	389.8	0.000286168	389.8	0.00034639	389.8	0.000377047	389.8	0.00161
390	0.000228734	390	0.00224	390		390	0.000147506	390	0.00326	390	0.00215	390	0.000644486	390	0.000177837	390	0.00366	390	0.00963	390	0.000798422	390	0.000291831	390	0.00036641	390	0.000377047	390	0.00168
390.2	0.000231239	390.2	0.0022	390.2		390.2	0.000147506	390.2	0.00325	390.2	0.0022	390.2	0.000703749	390.2	0.000172079	390.2	0.00381	390.2	0.00963	390.2	0.00088131	390.2	0.000305358	390.2	0.00036641	390.2	0.000379016	390.2	0.00179
390.4	0.000233326	390.4	0.00217	390.4		390.4	0.000154683	390.4	0.00317	390.4	0.00225	390.4	0.000718565	390.4	0.000171866	390.4	0.00397	390.4	0.00965	390.4	0.00088131	390.4	0.000316893	390.4	0.00036641	390.4	0.000382532	390.4	0.00182
390.6	0.000233326	390.6	0.00211	390.6		390.6	0.000155816	390.6	0.00316	390.6	0.00225	390.6	0.000750049	390.6	0.000171013	390.6	0.004	390.6	0.00963	390.6	0.00088131	390.6	0.000332518	390.6	0.00036641	390.6	0.000408831	390.6	0.00184
390.8	0.000233326	390.8	0.00211	390.8		390.8	0.000156005	390.8	0.00317	390.8	0.00225	390.8	0.000750049	390.8	0.000171013	390.8	0.00401	390.8	0.00964	390.8	0.00088131	390.8	0.000332518	390.8	0.000357564	390.8	0.00041516	390.8	0.00184
391	0.000228734	391	0.00211	391		391	0.000156005	391	0.00316	391	0.00227	391	0.000760234	391	0.000171013	391	0.00401	391	0.00965	391	0.00088131	391	0.000332518	391	0.000356633	391	0.000425145	391	0.00185
391.2	0.000228734	391.2	0.00211	391.2		391.2	0.000156005	391.2	0.00316	391.2	0.00225	391.2	0.000817646	391.2	0.000177837	391.2	0.00401	391.2	0.00965	391.2	0.00088131	391.2	0.000316893	391.2	0.000356633	391.2	0.000425145	391.2	0.00187
391.4	0.000219552	391.4	0.00212	391.4		391.4	0.000163182	391.4	0.00316	391.4	0.00225	391.4	0.000857463	391.4	0.000187006	391.4	0.00398	391.4	0.00964	391.4	0.000883268	391.4	0.000316264	391.4	0.000356633	391.4	0.000427536	391.4	0.00189
391.6	0.000219552	391.6	0.00214	391.6		391.6	0.000163937	391.6	0.00317	391.6	0.00225	391.6	0.000857463	391.6	0.000187006	391.6	0.00397	391.6	0.00962	391.6	0.000883268	391.6	0.00031574	391.6	0.000349649	391.6	0.000429505	391.6	0.00189
391.8	0.000219552	391.8	0.00214	391.8		391.8	0.000169415	391.8	0.00316	391.8	0.00227	391.8	0.000837091	391.8	0.000187006	391.8	0.00394	391.8	0.00963	391.8	0.000883268	391.8	0.000315215	391.8	0.000349649	391.8	0.000431614	391.8	0.00189
392	0.000233326	392	0.00214	392		392	0.000170548	392	0.00315	392	0.0023	392	0.000837091	392	0.000187006	392	0.00394	392	0.00964	392	0.000883268	392	0.000298228	392	0.000349649	392	0.000447647	392	0.00196
392.2	0.000233326	392.2	0.00219	392.2		392.2	0.000173003	392.2	0.00312	392.2	0.0023	392.2	0.000837091	392.2	0.000183168	392.2	0.00394	392.2	0.00961	392.2	0.000883268	392.2	0.000295711	392.2	0.000350581	392.2	0.000440052	392.2	0.00197
392.4	0.000242509	392.4	0.00219	392.4		392.4	0.000173003	392.4	0.00312	392.4	0.0023	392.4	0.000785236	392.4	0.000176771	392.4	0.00398	392.4	0.00961	392.4	0.000895886	392.4	0.000295711	392.4	0.000357564	392.4	0.000440052	392.4	0.00197
392.6	0.00024543	392.6	0.0022	392.6		392.6	0.000179236	392.6	0.00311	392.6	0.0023	392.6	0.000729677	392.6	0.000176771	392.6	0.00401	392.6	0.00957	392.6	0.00088218	392.6	0.000295711	392.6	0.000350581	392.6	0.000440615	392.6	0.00198
392.8	0.000265466	392.8	0.00226	392.8		392.8	0.000191701	392.8	0.00309	392.8	0.0023	392.8	0.00067597	392.8	0.000176771	392.8	0.00402	392.8	0.00958	392.8	0.00088218	392.8	0.000298228	392.8	0.000349649	392.8	0.0004506	392.8	0.00197
393	0.000248352	393	0.00229	393		393	0.000191701	393	0.00303	393	0.00231	393	0.00067134	393	0.000176771	393	0.00403	393	0.00955	393	0.00088218	393	0.000298962	393	0.000349184	393	0.000457069	393	0.00198
393.2	0.000265466	393.2	0.00229	393.2		393.2	0.000183391	393.2	0.00302	393.2	0.00235	393.2	0.00067134	393.2	0.000179543	393.2	0.00404	393.2	0.00952	393.2	0.000888054	393.2	0.000303785	393.2	0.000344994	393.2	0.000457069	393.2	0.00198
393.4	0.000271727	393.4	0.00231	393.4		393.4	0.000183391	393.4	0.00292	393.4	0.00234	393.4	0.000656524	393.4	0.000181035	393.4	0.00408	393.4	0.00954	393.4	0.000911333	393.4	0.000309762	393.4	0.000339407	393.4	0.000461851	393.4	0.00197
393.6	0.000280492	393.6	0.00231	393.6		393.6	0.000183391	393.6	0.00284	393.6	0.00229	393.6	0.00067134	393.6	0.000181035	393.6	0.00422	393.6	0.00949	393.6	0.000937222	393.6	0.000320983	393.6	0.0003138	393.6	0.000474086	393.6	0.00198
393.8	0.000292596	393.8	0.00232	393.8		393.8	0.000190001	393.8	0.00283	393.8	0.00229	393.8	0.00067134	393.8	0.000181035	393.8	0.00422	393.8	0.00947	393.8	0.000937222	393.8	0.000324233	393.8	0.0003138	393.8	0.000493354	393.8	0.00198
394	0.000292596	394	0.00233	394		394	0.000190001	394	0.00283	394	0.00228	394	0.00067134	394	0.000180396	394	0.00424	394	0.00943	394	0.000937222	394	0.000330525	394	0.0003138	394	0.000499401	394	0.00198
394.2	0.000305953	394.2	0.00233	394.2		394.2	0.000183391	394.2	0.0028	394.2	0.00228	394.2	0.000709305	394.2	0.000180396	394.2	0.00424	394.2	0.00942	394.2	0.000937222	394.2	0.000331993	394.2	0.0003138	394.2	0.000509246	394.2	0.00199
394.4	0.000337258	394.4	0.00243	394.4		394.4	0.000183391	394.4	0.00277	394.4	0.00228	394.4	0.000724121	394.4	0.000181035	394.4	0.00425	394.4	0.00937	394.4	0.000917642	394.4	0.000332098	394.4	0.000323577	394.4	0.000537232	394.4	0.00198
394.6	0.00034811	394.6	0.00243	394.6		394.6	0.000190001	394.6	0.00275	394.6	0.00228	394.6	0.000724121	394.6	0.000181035	394.6	0.00433	394.6	0.00936	394.6	0.000917642	394.6	0.000335768	394.6	0.000373394	394.6	0.000556078	394.6	0.00199
394.8	0.000358128	394.8	0.00243	394.8		394.8	0.000190001	394.8	0.00275	394.8	0.00228	394.8	0.000830609	394.8	0.00019319	394.8	0.00435	394.8	0.0093	394.8	0.000917642	394.8	0.000336607	394.8	0.000379446	394.8	0.000597847	394.8	0.00199
395	0.000363972	395	0.00248	395		395	0.000199445	395	0.00269	395	0.00237	395	0.000830609	395	0.000194682	395	0.00438	395	0.00929	395	0.000917642	395	0.000337446	395	0.000379446	395	0.000605582	395	0.00201
395.2	0.000373989	395.2	0.00249	395.2		395.2	0.000199445	395.2	0.00254	395.2	0.00239	395.2	0.000831535	395.2	0.00020577	395.2	0.00442	395.2	0.00926	395.2	0.000958324	395.2	0.000337446	395.2	0.000384102	395.2	0.000606566	395.2	0.00204
395.4	0.000426164	395.4	0.00255	395.4		395.4	0.000200389	395.4	0.00242	395.4	0.00239	395.4	0.000873205	395.4	0.00020577	395.4	0.0045	395.4	0.00925	395.4	0.000989217	395.4	0.000340277	395.4	0.000408312	395.4	0.000607832	395.4	0.00205
395.6	0.000433677	395.6	0.00255	395.6		395.6	0.000202089	395.6	0.00242	395.6	0.00239	395.6	0.000904688	395.6	0.00020577	395.6	0.0045	395.6	0.00924	395.6	0.00101	395.6	0.000343423	395.6	0.000408312	395.6	0.000654805	395.6	0.00206
395.8	0.000434929	395.8	0.00256	395.8		395.8	0.000202089	395.8	0.00242	395.8	0.00239	395.8	0.000904688	395.8	0.00020577	395.8	0.00453	395.8	0.00922	395.8	0.00102	395.8	0.000373728	395.8	0.000408778	395.8	0.000686589	395.8	0.00206
396	0.000444112	396	0.00257	396		396	0.000199445	396	0.00239	396	0.00241	396	0.000904688	396	0.00021302	396	0.00457	396	0.0092	396	0.00103	396	0.000407179	396	0.000392017	396	0.000687714	396	0.00209
396.2	0.000467904	396.2	0.00264	396.2		396.2	0.000199445	396.2	0.00231	396.2	0.00241	396.2	0.00091117	396.2	0.00022091	396.2	0.00464	396.2	0.00913	396.2	0.00104	396.2	0.000407179	396.2	0.000392017	396.2	0.000705434	396.2	0.00209
396.4	0.000467904	396.4	0.00265	396.4		396.4	0.000197556	396.4	0.00232	396.4	0.00242	396.4	0.00091117	396.4	0.00022091	396.4	0.00469	396.4	0.00908	396.4	0.00108	396.4	0.000412842	396.4	0.000392017	396.4	0.000708528	396.4	0.00211
396.6	0.000467904	396.6	0.0027	396.6		396.6	0.000197178	396.6	0.00242	396.6	0.00242	396.6	0.000927838	396.6	0.00022752	396.6	0.00469	396.6	0.00904	396.6	0.00113	396.6	0.0004141	396.6	0.000392017	396.6	0.000726951	396.6	0.00211
396.8	0.000586863	396.8	0.0027	396.8		396.8	0.000195667	396.8	0.00233	396.8	0.00242	396.8	0.000932468	396.8	0.00022752	396.8	0.00472	396.8	0.00898	396.8	0.0012	396.8	0.000415149	396.8	0.000387361	396.8	0.000783909	396.8	0.00214
397	0.000633611	397	0.00277	397		397	0.000195667	397	0.00233	397	0.00242	397	0.000932468	397	0.000225388	397	0.00475	397	0.00897	397	0.00121	397	0.000415149	397	0.000387361	397	0.000791082	397	0.00233
397.2	0.00076217	397.2	0.00279	397.2		397.2	0.000197178	397.2	0.00233	397.2	0.0024	397.2	0.000980619	397.2	0.000224322	397.2	0.0048	397.2	0.00895	397.2	0.00127	397.2	0.000436855	397.2	0.000387361	397.2	0.000821881	397.2	0.00234
397.4	0.000775527	397.4	0.00279	397.4		397.4	0.000197178	397.4	0.00242	397.4	0.0024	397.4	0.00103	397.4	0.000224108	397.4	0.00488	397.4	0.0089	397.4	0.00139	397.4	0.000455626	397.4	0.000387361	397.4	0.000827366	397.4	0.00236
397.6	0.000853998	397.6	0.00283	397.6		397.6	0.000197178	397.6	0.00242	397.6	0.0024	397.6	0.00105	397.6	0.000224322	397.6	0.00505	397.6	0.00887	397.6	0.00139	397.6	0.000458352	397.6	0.000385499	397.6	0.000932843	397.6	0.00239
397.8	0.000950834	397.8	0.0029	397.8		397.8	0.000207755	397.8	0.00242	397.8	0.0024	397.8	0.00105	397.8	0.000225388	397.8	0.00518	397.8	0.00881	397.8	0.00144	397.8	0.000462232	397.8	0.000405519	397.8	0.00093425	397.8	0.00243
398	0.00103	398	0.0029	398		398	0.000207944	398	0.00242	398	0.0024	398	0.00105	398	0.000225388	398	0.0053	398	0.00873	398	0.00149	398	0.000508161	398	0.000424607	398	0.000978832	398	0.00244
398.2	0.00105	398.2	0.00293	398.2		398.2	0.000209077	398.2	0.00243	398.2	0.00243	398.2	0.00105	398.2	0.000237329	398.2	0.00533	398.2	0.00871	398.2	0.00152	398.2	0.000517599	398.2	0.000426935	398.2	0.000995567	398.2	0.00254
398.4	0.0012	398.4	0.00293	398.4		398.4	0.000220031	398.4	0.00243	398.4	0.00243	398.4	0.00094821	398.4	0.000254388	398.4	0.00536	398.4	0.00866	398.4	0.00155	398.4	0.000539096	398.4	0.000439506	398.4	0.00103	398.4	0.00258
398.6	0.00121	398.6	0.00293	398.6		398.6	0.000220409	398.6	0.00241	398.6	0.00243	398.6	0.00094821	398.6	0.000258226	398.6	0.00544	398.6	0.00859	398.6	0.00156	398.6	0.000555454	398.6	0.000471631	398.6	0.00108	398.6	0.00258
398.8	0.00129	398.8	0.00295	398.8		398.8	0.000234952	398.8	0.00237	398.8	0.00243	398.8	0.00094821	398.8	0.000259718	398.8	0.00552	398.8	0.00859	398.8	0.00158	398.8	0.000568772	398.8	0.000475821	398.8	0.00118	398.8	0.00283
399	0.00136	399	0.00301	399		399	0.000237029	399	0.00237	399	0.00241	399	0.000940802	399	0.000293409	399	0.00554	399	0.00854	399	0.00161	399	0.000579992	399	0.000498634	399	0.00119	399	0.00292
399.2	0.00141	399.2	0.00306	399.2		399.2	0.000239107	399.2	0.00241	399.2	0.00241	399.2	0.000940802	399.2	0.000297248	399.2	0.0057	399.2	0.00853	399.2	0.00161	399.2	0.000618686	399.2	0.000505618	399.2	0.0012	399.2	0.00317
399.4	0.00143	399.4	0.00312	399.4		399.4	0.000239107	399.4	0.00243	399.4	0.00241	399.4	0.000957469	399.4	0.000335843	399.4	0.00586	399.4	0.00851	399.4	0.00168	399.4	0.000623615	399.4	0.000520051	399.4	0.00127	399.4	0.00321
399.6	0.00157	399.6	0.00315	399.6		399.6	0.000239107	399.6	0.00245	399.6	0.00241	399.6	0.000980619	399.6	0.000335843	399.6	0.00592	399.6	0.0085	399.6	0.00179	399.6	0.000641126	399.6	0.000521448	399.6	0.00128	399.6	0.00331
399.8	0.00159	399.8	0.00322	399.8		399.8	0.000239107	399.8	0.00249	399.8	0.00242	399.8	0.00102	399.8	0.000335843	399.8	0.00596	399.8	0.00848	399.8	0.0019	399.8	0.000681708	399.8	0.000549848	399.8	0.00134	399.8	0.00345
400	0.00159	400	0.00347	400	0.00133	400	0.000239107	400	0.00264	400	0.00246	400	0.00119	400	0.000335843	400	0.00596	400	0.00842	400	0.00202	400	0.000715893	400	0.000549848	400	0.0014	400	0.00363
400.2	0.00171	400.2	0.00351	400.2	0.0012	400.2	0.000239107	400.2	0.00266	400.2	0.0025	400.2	0.00132	400.2	0.000335843	400.2	0.00604	400.2	0.00839	400.2	0.00211	400.2	0.000724072	400.2	0.000549848	400.2	0.00143	400.2	0.00375
400.4	0.00176	400.4	0.00358	400.4	0.0014	400.4	0.000239107	400.4	0.00268	400.4	0.00254	400.4	0.00139	400.4	0.000335843	400.4	0.00616	400.4	0.00834	400.4	0.00218	400.4	0.000759935	400.4	0.000633652	400.4	0.0015	400.4	0.00384
400.6	0.00184	400.6	0.00377	400.6	0.00116	400.6	0.000233819	400.6	0.00269	400.6	0.00257	400.6	0.00165	400.6	0.000335843	400.6	0.00628	400.6	0.0083	400.6	0.00219	400.6	0.000761718	400.6	0.000642498	400.6	0.00154	400.6	0.00396
400.8	0.00192	400.8	0.0038	400.8	0.00139	400.8	0.000233819	400.8	0.00297	400.8	0.00258	400.8	0.00166	400.8	0.00035546	400.8	0.00637	400.8	0.00826	400.8	0.00228	400.8	0.000775664	400.8	0.000697902	400.8	0.00155	400.8	0.00396
401	0.00196	401	0.00384	401	0.00149	401	0.000223242	401	0.00309	401	0.0026	401	0.00167	401	0.000371453	401	0.00652	401	0.00824	401	0.00229	401	0.000800097	401	0.000735148	401	0.00157	401	0.00397
401.2	0.00196	401.2	0.00388	401.2	0.00139	401.2	0.000210777	401.2	0.00316	401.2	0.00266	401.2	0.00168	401.2	0.000410261	401.2	0.00653	401.2	0.00821	401.2	0.0023	401.2	0.000802929	401.2	0.000735148	401.2	0.00161	401.2	0.00408
401.4	0.00202	401.4	0.00389	401.4	0.00139	401.4	0.000206433	401.4	0.00318	401.4	0.00267	401.4	0.0018	401.4	0.000448004	401.4	0.00669	401.4	0.00817	401.4	0.00245	401.4	0.0008131	401.4	0.000750512	401.4	0.00161	401.4	0.00425
401.6	0.00207	401.6	0.00413	401.6	0.00144	401.6	0.000200011	401.6	0.00331	401.6	0.00267	401.6	0.00188	401.6	0.000458665	401.6	0.0069	401.6	0.00813	401.6	0.00245	401.6	0.000848334	401.6	0.000750512	401.6	0.00162	401.6	0.00429
401.8	0.00207	401.8	0.00426	401.8	0.00114	401.8	0.000191701	401.8	0.00331	401.8	0.00271	401.8	0.00193	401.8	0.000465702	401.8	0.00694	401.8	0.00813	401.8	0.00246	401.8	0.000848334	401.8	0.000750512	401.8	0.00164	401.8	0.00437
402	0.00207	402	0.00443	402	0.00137	402	0.000191701	402	0.00345	402	0.00273	402	0.00199	402	0.000465702	402	0.00697	402	0.00806	402	0.00253	402	0.000850431	402	0.000750512	402	0.00168	402	0.00459
402.2	0.00207	402.2	0.00454	402.2	0.00144	402.2	0.000191701	402.2	0.00351	402.2	0.00273	402.2	0.00212	402.2	0.000471673	402.2	0.007	402.2	0.00804	402.2	0.00253	402.2	0.000850431	402.2	0.000750512	402.2	0.00169	402.2	0.0046
402.4	0.00207	402.4	0.0046	402.4	0.00141	402.4	0.000198311	402.4	0.00366	402.4	0.00272	402.4	0.00217	402.4	0.000471673	402.4	0.00702	402.4	0.00799	402.4	0.00247	402.4	0.000850641	402.4	0.00077286	402.4	0.00174	402.4	0.00473
402.6	0.00207	402.6	0.00465	402.6	0.00143	402.6	0.000198311	402.6	0.00383	402.6	0.00272	402.6	0.00219	402.6	0.000471673	402.6	0.00707	402.6	0.00796	402.6	0.00253	402.6	0.000851899	402.6	0.00077286	402.6	0.00178	402.6	0.0048
402.8	0.00207	402.8	0.00466	402.8	0.00143	402.8	0.000214743	402.8	0.00387	402.8	0.00272	402.8	0.00219	402.8	0.000500459	402.8	0.00707	402.8	0.00793	402.8	0.00253	402.8	0.000851899	402.8	0.000806382	402.8	0.00183	402.8	0.00483
403	0.00213	403	0.00477	403	0.00133	403	0.000215309	403	0.00387	403	0.00272	403	0.00222	403	0.000501739	403	0.00707	403	0.00791	403	0.00253	403	0.000871928	403	0.000831523	403	0.00183	403	0.00484
403.2	0.00218	403.2	0.00487	403.2	0.00148	403.2	0.000217954	403.2	0.00387	403.2	0.00272	403.2	0.00222	403.2	0.000501739	403.2	0.00707	403.2	0.00786	403.2	0.00254	403.2	0.000874759	403.2	0.000831523	403.2	0.00184	403.2	0.00484
403.4	0.00218	403.4	0.00489	403.4	0.00151	403.4	0.000234574	403.4	0.00387	403.4	0.00269	403.4	0.00223	403.4	0.000501739	403.4	0.00701	403.4	0.00783	403.4	0.00254	403.4	0.000880946	403.4	0.000806382	403.4	0.00186	403.4	0.00486
403.6	0.00218	403.6	0.00497	403.6	0.00136	403.6	0.000234574	403.6	0.00384	403.6	0.00262	403.6	0.00228	403.6	0.000501739	403.6	0.00697	403.6	0.00781	403.6	0.00256	403.6	0.000880946	403.6	0.000783103	403.6	0.00187	403.6	0.00489
403.8	0.00213	403.8	0.00506	403.8	0.00139	403.8	0.000234574	403.8	0.00376	403.8	0.0026	403.8	0.00228	403.8	0.000489584	403.8	0.00694	403.8	0.00777	403.8	0.00259	403.8	0.000880946	403.8	0.000750512	403.8	0.00187	403.8	0.0049
404	0.00211	404	0.00506	404	0.00144	404	0.000235141	404	0.00374	404	0.00255	404	0.00227	404	0.000479776	404	0.00689	404	0.00772	404	0.00262	404	0.000874759	404	0.000719784	404	0.00188	404	0.0049
404.2	0.00204	404.2	0.00497	404.2	0.00142	404.2	0.000237218	404.2	0.00352	404.2	0.0025	404.2	0.00227	404.2	0.000451842	404.2	0.00683	404.2	0.00767	404.2	0.00263	404.2	0.000867628	404.2	0.000708145	404.2	0.00189	404.2	0.00494
404.4	0.00191	404.4	0.00494	404.4	0.00146	404.4	0.000240807	404.4	0.00348	404.4	0.00248	404.4	0.00227	404.4	0.000429026	404.4	0.00682	404.4	0.00761	404.4	0.00263	404.4	0.000860917	404.4	0.000704886	404.4	0.00192	404.4	0.00494
404.6	0.0018	404.6	0.00494	404.6	0.00138	404.6	0.000247039	404.6	0.00345	404.6	0.00244	404.6	0.00226	404.6	0.000429026	404.6	0.00679	404.6	0.00757	404.6	0.00263	404.6	0.000844035	404.6	0.000697436	404.6	0.00193	404.6	0.00494
404.8	0.00165	404.8	0.00493	404.8	0.00129	404.8	0.000247039	404.8	0.00343	404.8	0.00242	404.8	0.00223	404.8	0.000429026	404.8	0.00668	404.8	0.00751	404.8	0.00263	404.8	0.000841937	404.8	0.000697436	404.8	0.00194	404.8	0.0049
405	0.00163	405	0.00491	405	0.00136	405	0.000247039	405	0.00332	405	0.00242	405	0.00219	405	0.000428599	405	0.00653	405	0.0075	405	0.00257	405	0.000841728	405	0.000697436	405	0.00194	405	0.00476
405.2	0.00157	405.2	0.00491	405.2	0.00137	405.2	0.000247039	405.2	0.00324	405.2	0.00241	405.2	0.00202	405.2	0.000428599	405.2	0.00648	405.2	0.00746	405.2	0.0025	405.2	0.000820755	405.2	0.000697436	405.2	0.00193	405.2	0.00455
405.4	0.00143	405.4	0.0049	405.4	0.00129	405.4	0.000247039	405.4	0.00314	405.4	0.00236	405.4	0.00198	405.4	0.000417298	405.4	0.00636	405.4	0.00741	405.4	0.0024	405.4	0.000819077	405.4	0.000689522	405.4	0.00193	405.4	0.00449
405.6	0.00133	405.6	0.0049	405.6	0.00136	405.6	0.000243829	405.6	0.00299	405.6	0.00234	405.6	0.0019	405.6	0.000417298	405.6	0.00635	405.6	0.00738	405.6	0.00233	405.6	0.000815722	405.6	0.000689522	405.6	0.00194	405.6	0.00442
405.8	0.00132	405.8	0.0049	405.8	0.00121	405.8	0.00023684	405.8	0.00296	405.8	0.00234	405.8	0.0018	405.8	0.000385526	405.8	0.00629	405.8	0.00732	405.8	0.00227	405.8	0.000798524	405.8	0.000689522	405.8	0.00192	405.8	0.00436
406	0.00131	406	0.00482	406	0.00146	406	0.000231741	406	0.00293	406	0.00232	406	0.00176	406	0.000379556	406	0.00625	406	0.00728	406	0.00226	406	0.000777237	406	0.00065181	406	0.0019	406	0.00432
406.2	0.00127	406.2	0.00476	406.2	0.00142	406.2	0.000221164	406.2	0.00285	406.2	0.00229	406.2	0.00171	406.2	0.000379556	406.2	0.00601	406.2	0.00721	406.2	0.00226	406.2	0.000776398	406.2	0.000629462	406.2	0.00188	406.2	0.00422
406.4	0.00125	406.4	0.0046	406.4	0.00148	406.4	0.00022022	406.4	0.00271	406.4	0.00226	406.4	0.0016	406.4	0.000375931	406.4	0.006	406.4	0.00715	406.4	0.00224	406.4	0.000762662	406.4	0.000629462	406.4	0.0019	406.4	0.00411
406.6	0.00121	406.6	0.00456	406.6	0.00141	406.6	0.000217387	406.6	0.00247	406.6	0.00224	406.6	0.00151	406.6	0.000375931	406.6	0.00595	406.6	0.00707	406.6	0.00219	406.6	0.000758467	406.6	0.000629462	406.6	0.00192	406.6	0.00407
406.8	0.0011	406.8	0.00452	406.8	0.00148	406.8	0.000217387	406.8	0.00236	406.8	0.00221	406.8	0.00147	406.8	0.000379556	406.8	0.00569	406.8	0.00704	406.8	0.00214	406.8	0.000750288	406.8	0.000628065	406.8	0.00193	406.8	0.00391
407	0.000970869	407	0.00452	407	0.00127	407	0.000215876	407	0.00233	407	0.00218	407	0.00147	407	0.000379556	407	0.00567	407	0.00702	407	0.00208	407	0.000743891	407	0.000629462	407	0.00193	407	0.00375
407.2	0.000940399	407.2	0.00452	407.2	0.00135	407.2	0.000213043	407.2	0.00222	407.2	0.00216	407.2	0.00134	407.2	0.000379556	407.2	0.00564	407.2	0.00697	407.2	0.00197	407.2	0.00074106	407.2	0.000642033	407.2	0.00193	407.2	0.00361
407.4	0.00086652	407.4	0.00451	407.4	0.00155	407.4	0.000213043	407.4	0.00216	407.4	0.00212	407.4	0.00122	407.4	0.000368254	407.4	0.00556	407.4	0.00694	407.4	0.00194	407.4	0.000733825	407.4	0.000642498	407.4	0.00193	407.4	0.0036
407.6	0.00077344	407.6	0.00451	407.6	0.00144	407.6	0.000212854	407.6	0.00216	407.6	0.00209	407.6	0.00115	407.6	0.000361857	407.6	0.00554	407.6	0.00689	407.6	0.00194	407.6	0.000727952	407.6	0.000650413	407.6	0.00193	407.6	0.00355
407.8	0.000757579	407.8	0.00455	407.8	0.0014	407.8	0.000212854	407.8	0.00208	407.8	0.00206	407.8	0.0011	407.8	0.000361857	407.8	0.00552	407.8	0.00684	407.8	0.00189	407.8	0.00072554	407.8	0.000650413	407.8	0.00193	407.8	0.00343
408	0.000674516	408	0.00455	408	0.00145	408	0.000212854	408	0.00206	408	0.00206	408	0.0011	408	0.000361857	408	0.00544	408	0.00679	408	0.00188	408	0.000721765	408	0.00065181	408	0.00192	408	0.00339
408.2	0.000646551	408.2	0.00456	408.2	0.00136	408.2	0.000212854	408.2	0.00203	408.2	0.00207	408.2	0.00109	408.2	0.000358232	408.2	0.00538	408.2	0.00675	408.2	0.00188	408.2	0.000710965	408.2	0.000652275	408.2	0.00192	408.2	0.00318
408.4	0.000606898	408.4	0.00459	408.4	0.00156	408.4	0.000239107	408.4	0.00203	408.4	0.00206	408.4	0.00109	408.4	0.000361857	408.4	0.00533	408.4	0.00671	408.4	0.00188	408.4	0.000710965	408.4	0.000688125	408.4	0.00192	408.4	0.00318
408.6	0.00060648	408.6	0.00456	408.6	0.0016	408.6	0.00024024	408.6	0.00203	408.6	0.00206	408.6	0.0011	408.6	0.000358872	408.6	0.0052	408.6	0.00666	408.6	0.00186	408.6	0.000710965	408.6	0.000688125	408.6	0.00193	408.6	0.00313
408.8	0.00058895	408.8	0.00456	408.8	0.00155	408.8	0.000240618	408.8	0.00206	408.8	0.00207	408.8	0.00111	408.8	0.000358872	408.8	0.00503	408.8	0.00659	408.8	0.00186	408.8	0.000710965	408.8	0.000685331	408.8	0.00193	408.8	0.00311
409	0.000586863	409	0.00455	409	0.00159	409	0.000240618	409	0.00215	409	0.00208	409	0.00117	409	0.000363137	409	0.0049	409	0.00655	409	0.00185	409	0.000712642	409	0.000688125	409	0.00193	409	0.0031
409.2	0.000579349	409.2	0.00448	409.2	0.00149	409.2	0.00024024	409.2	0.00219	409.2	0.00209	409.2	0.00117	409.2	0.000363137	409.2	0.00487	409.2	0.00652	409.2	0.00185	409.2	0.000712642	409.2	0.000685331	409.2	0.00193	409.2	0.00307
409.4	0.000515905	409.4	0.00441	409.4	0.0013	409.4	0.00024024	409.4	0.00231	409.4	0.00209	409.4	0.00117	409.4	0.000366762	409.4	0.00479	409.4	0.00648	409.4	0.00181	409.4	0.000719458	409.4	0.000685331	409.4	0.00194	409.4	0.00298
409.6	0.000481261	409.6	0.00438	409.6	0.00155	409.6	0.00022853	409.6	0.00231	409.6	0.00209	409.6	0.00119	409.6	0.000367828	409.6	0.00473	409.6	0.00644	409.6	0.00181	409.6	0.000727008	409.6	0.000705817	409.6	0.00196	409.6	0.00281
409.8	0.000429503	409.8	0.00438	409.8	0.00137	409.8	0.00022853	409.8	0.00231	409.8	0.00209	409.8	0.0012	409.8	0.000378063	409.8	0.00471	409.8	0.0064	409.8	0.0018	409.8	0.000728267	409.8	0.000705817	409.8	0.00196	409.8	0.0028
410	0.000376911	410	0.00438	410	0.00134	410	0.00022853	410	0.00231	410	0.00209	410	0.0012	410	0.00038446	410	0.00468	410	0.00637	410	0.00174	410	0.00072984	410	0.000717456	410	0.00199	410	0.00276
410.2	0.000360215	410.2	0.00438	410.2	0.00154	410.2	0.00022853	410.2	0.00224	410.2	0.00209	410.2	0.00121	410.2	0.000408342	410.2	0.00468	410.2	0.00632	410.2	0.00174	410.2	0.000758257	410.2	0.000717456	410.2	0.00202	410.2	0.00276
410.4	0.000341432	410.4	0.00433	410.4	0.00146	410.4	0.000232308	410.4	0.00224	410.4	0.00207	410.4	0.00122	410.4	0.000408342	410.4	0.00468	410.4	0.00627	410.4	0.00172	410.4	0.000777971	410.4	0.000717456	410.4	0.00203	410.4	0.00276
410.6	0.000323484	410.6	0.00433	410.6	0.00161	410.6	0.000237974	410.6	0.00216	410.6	0.00203	410.6	0.00126	410.6	0.000410901	410.6	0.00471	410.6	0.00623	410.6	0.00172	410.6	0.000781012	410.6	0.000717456	410.6	0.00206	410.6	0.00276
410.8	0.000318058	410.8	0.00443	410.8	0.00157	410.8	0.000242506	410.8	0.0021	410.8	0.00201	410.8	0.00122	410.8	0.000431798	410.8	0.0047	410.8	0.00616	410.8	0.00174	410.8	0.000783844	410.8	0.000723043	410.8	0.00207	410.8	0.00272
411	0.000313884	411	0.00443	411	0.00171	411	0.000258183	411	0.00205	411	0.00199	411	0.00132	411	0.000437129	411	0.0047	411	0.00617	411	0.00174	411	0.000785521	411	0.000723043	411	0.00207	411	0.0027
411.2	0.000313884	411.2	0.00433	411.2	0.00143	411.2	0.000258183	411.2	0.00196	411.2	0.00198	411.2	0.00133	411.2	0.000443526	411.2	0.0047	411.2	0.00612	411.2	0.00176	411.2	0.000796008	411.2	0.000723043	411.2	0.00211	411.2	0.0027
411.4	0.000315136	411.4	0.00433	411.4	0.0015	411.4	0.000258183	411.4	0.0019	411.4	0.00198	411.4	0.00133	411.4	0.000458239	411.4	0.00473	411.4	0.00608	411.4	0.00179	411.4	0.000798524	411.4	0.000723043	411.4	0.00212	411.4	0.0027
411.6	0.000315136	411.6	0.00424	411.6	0.00154	411.6	0.000249872	411.6	0.0019	411.6	0.00194	411.6	0.00133	411.6	0.000463143	411.6	0.00473	411.6	0.00604	411.6	0.0018	411.6	0.000798524	411.6	0.000749581	411.6	0.00214	411.6	0.00269
411.8	0.000315136	411.8	0.00423	411.8	0.00161	411.8	0.000249872	411.8	0.00188	411.8	0.00192	411.8	0.00133	411.8	0.000463783	411.8	0.00477	411.8	0.00602	411.8	0.00181	411.8	0.000799783	411.8	0.000822677	411.8	0.00214	411.8	0.00269
412	0.000353954	412	0.00418	412	0.00159	412	0.000249872	412	0.00183	412	0.00192	412	0.00133	412	0.000515812	412	0.00479	412	0.00599	412	0.00185	412	0.000799783	412	0.000834782	412	0.00214	412	0.0027
412.2	0.000363972	412.2	0.00418	412.2	0.00178	412.2	0.000249872	412.2	0.00183	412.2	0.00192	412.2	0.00133	412.2	0.000541187	412.2	0.00479	412.2	0.00596	412.2	0.00185	412.2	0.000806704	412.2	0.000851077	412.2	0.00214	412.2	0.0027
412.4	0.000373572	412.4	0.00413	412.4	0.0017	412.4	0.000249872	412.4	0.00183	412.4	0.00192	412.4	0.00133	412.4	0.000541187	412.4	0.00479	412.4	0.00591	412.4	0.00186	412.4	0.000815827	412.4	0.000862251	412.4	0.00222	412.4	0.00271
412.6	0.000396529	412.6	0.00413	412.6	0.00171	412.6	0.000251383	412.6	0.00186	412.6	0.00193	412.6	0.00129	412.6	0.0005559	412.6	0.00479	412.6	0.00586	412.6	0.00187	412.6	0.000862176	412.6	0.0008697	412.6	0.00222	412.6	0.00276
412.8	0.00040112	412.8	0.00409	412.8	0.0016	412.8	0.000251383	412.8	0.00183	412.8	0.00193	412.8	0.00133	412.8	0.000557179	412.8	0.00479	412.8	0.00583	412.8	0.00187	412.8	0.000894788	412.8	0.000882271	412.8	0.00223	412.8	0.00279
413	0.00040112	413	0.00409	413	0.0019	413	0.000265548	413	0.0018	413	0.00193	413	0.00126	413	0.000584047	413	0.00479	413	0.0058	413	0.002	413	0.000936313	413	0.0008697	413	0.00226	413	0.00282
413.2	0.000396529	413.2	0.00408	413.2	0.00173	413.2	0.000288213	413.2	0.0018	413.2	0.00194	413.2	0.00126	413.2	0.000591936	413.2	0.00479	413.2	0.0058	413.2	0.00203	413.2	0.000944912	413.2	0.0008697	413.2	0.0023	413.2	0.00293
413.4	0.000420738	413.4	0.00407	413.4	0.00198	413.4	0.000300111	413.4	0.0018	413.4	0.00194	413.4	0.00126	413.4	0.000623069	413.4	0.00479	413.4	0.0058	413.4	0.00208	413.4	0.000946065	413.4	0.000867373	413.4	0.00234	413.4	0.00293
413.6	0.000420738	413.6	0.00408	413.6	0.00173	413.6	0.000300678	413.6	0.00178	413.6	0.00195	413.6	0.00126	413.6	0.000655267	413.6	0.00488	413.6	0.00575	413.6	0.00212	413.6	0.00096127	413.6	0.000956764	413.6	0.00236	413.6	0.00296
413.8	0.000420738	413.8	0.00409	413.8	0.00175	413.8	0.000300678	413.8	0.00171	413.8	0.00195	413.8	0.00129	413.8	0.000656973	413.8	0.00488	413.8	0.00575	413.8	0.00222	413.8	0.000981509	413.8	0.000956764	413.8	0.00237	413.8	0.00297
414	0.000420738	414	0.00409	414	0.00174	414	0.000301811	414	0.00171	414	0.00196	414	0.00129	414	0.000673392	414	0.0049	414	0.00572	414	0.00225	414	0.000994092	414	0.000956764	414	0.00251	414	0.00301
414.2	0.000420738	414.2	0.0042	414.2	0.00173	414.2	0.00030691	414.2	0.00171	414.2	0.00198	414.2	0.00129	414.2	0.000702178	414.2	0.0049	414.2	0.00572	414.2	0.00227	414.2	0.00102	414.2	0.000956764	414.2	0.00254	414.2	0.00303
414.4	0.000424912	414.4	0.0042	414.4	0.00171	414.4	0.000311443	414.4	0.00173	414.4	0.00198	414.4	0.00139	414.4	0.000717531	414.4	0.0049	414.4	0.0057	414.4	0.00232	414.4	0.00103	414.4	0.00101	414.4	0.00256	414.4	0.00326
414.6	0.000450373	414.6	0.0042	414.6	0.00161	414.6	0.000311443	414.6	0.00173	414.6	0.00199	414.6	0.00139	414.6	0.000718597	414.6	0.00503	414.6	0.00571	414.6	0.00237	414.6	0.00105	414.6	0.00101	414.6	0.00257	414.6	0.00333
414.8	0.000487104	414.8	0.00423	414.8	0.0017	414.8	0.000311632	414.8	0.00178	414.8	0.00201	414.8	0.00139	414.8	0.0007557	414.8	0.00508	414.8	0.0057	414.8	0.00246	414.8	0.00108	414.8	0.00101	414.8	0.00259	414.8	0.00351
415	0.000491696	415	0.00423	415	0.0017	415	0.000336752	415	0.00178	415	0.00201	415	0.00141	415	0.000845471	415	0.00509	415	0.00572	415	0.00246	415	0.00117	415	0.00107	415	0.00263	415	0.00351
415.2	0.00049587	415.2	0.00415	415.2	0.00174	415.2	0.000358849	415.2	0.00178	415.2	0.00202	415.2	0.00143	415.2	0.000903044	415.2	0.00509	415.2	0.00573	415.2	0.00257	415.2	0.00119	415.2	0.00114	415.2	0.00268	415.2	0.00361
415.4	0.00049587	415.4	0.00415	415.4	0.00151	415.4	0.000360738	415.4	0.00178	415.4	0.00202	415.4	0.00145	415.4	0.000941426	415.4	0.00509	415.4	0.00574	415.4	0.00262	415.4	0.00125	415.4	0.00116	415.4	0.00281	415.4	0.00373
415.6	0.00049587	415.6	0.00412	415.6	0.00174	415.6	0.000364326	415.6	0.00178	415.6	0.00208	415.6	0.00145	415.6	0.000985992	415.6	0.00509	415.6	0.00573	415.6	0.0027	415.6	0.00126	415.6	0.00116	415.6	0.00283	415.6	0.00375
415.8	0.00049587	415.8	0.00412	415.8	0.00171	415.8	0.00037547	415.8	0.00177	415.8	0.00222	415.8	0.00146	415.8	0.00102	415.8	0.00514	415.8	0.00576	415.8	0.00279	415.8	0.00128	415.8	0.00116	415.8	0.00287	415.8	0.0038
416	0.000492948	416	0.00409	416	0.00182	416	0.000387179	416	0.00177	416	0.00222	416	0.00146	416	0.00105	416	0.00514	416	0.00577	416	0.00294	416	0.00134	416	0.0013	416	0.00295	416	0.00403
416.2	0.000492948	416.2	0.00407	416.2	0.00179	416.2	0.000407388	416.2	0.00177	416.2	0.00223	416.2	0.00148	416.2	0.00106	416.2	0.00514	416.2	0.00574	416.2	0.00301	416.2	0.00138	416.2	0.00133	416.2	0.00301	416.2	0.00404
416.4	0.000492948	416.4	0.00406	416.4	0.00182	416.4	0.000407577	416.4	0.00177	416.4	0.00223	416.4	0.00155	416.4	0.0011	416.4	0.0051	416.4	0.00576	416.4	0.00311	416.4	0.00143	416.4	0.00134	416.4	0.0031	416.4	0.00404
416.6	0.000492948	416.6	0.00406	416.6	0.00208	416.6	0.000410788	416.6	0.00178	416.6	0.00226	416.6	0.00156	416.6	0.00111	416.6	0.00515	416.6	0.00577	416.6	0.00317	416.6	0.00146	416.6	0.00138	416.6	0.00313	416.6	0.00408
416.8	0.000525088	416.8	0.00406	416.8	0.0022	416.8	0.00042873	416.8	0.00178	416.8	0.00226	416.8	0.00179	416.8	0.00117	416.8	0.00517	416.8	0.00581	416.8	0.00326	416.8	0.00154	416.8	0.00145	416.8	0.00321	416.8	0.00418
417	0.000541783	417	0.00406	417	0.00207	417	0.00043383	417	0.00178	417	0.00235	417	0.00181	417	0.0012	417	0.00521	417	0.00581	417	0.0033	417	0.00157	417	0.00145	417	0.0033	417	0.00435
417.2	0.000541783	417.2	0.00407	417.2	0.00225	417.2	0.000451961	417.2	0.00178	417.2	0.00235	417.2	0.00184	417.2	0.00128	417.2	0.00524	417.2	0.00584	417.2	0.00342	417.2	0.00162	417.2	0.00148	417.2	0.00335	417.2	0.00438
417.4	0.000550131	417.4	0.00411	417.4	0.00214	417.4	0.000459138	417.4	0.00179	417.4	0.00235	417.4	0.00189	417.4	0.00132	417.4	0.00525	417.4	0.00586	417.4	0.00345	417.4	0.00166	417.4	0.00154	417.4	0.00341	417.4	0.0045
417.6	0.000578097	417.6	0.00435	417.6	0.00208	417.6	0.000483691	417.6	0.00179	417.6	0.00235	417.6	0.00191	417.6	0.0014	417.6	0.0054	417.6	0.00588	417.6	0.0036	417.6	0.00175	417.6	0.00162	417.6	0.00344	417.6	0.00463
417.8	0.000611072	417.8	0.00445	417.8	0.00216	417.8	0.000486902	417.8	0.00179	417.8	0.00237	417.8	0.00213	417.8	0.00146	417.8	0.0055	417.8	0.00592	417.8	0.00366	417.8	0.00186	417.8	0.00162	417.8	0.00356	417.8	0.00477
418	0.000612324	418	0.00445	418	0.00223	418	0.000492757	418	0.00179	418	0.00237	418	0.00221	418	0.00155	418	0.00551	418	0.006	418	0.00377	418	0.00187	418	0.00173	418	0.00369	418	0.00484
418.2	0.000612324	418.2	0.00446	418.2	0.00231	418.2	0.000512588	418.2	0.00185	418.2	0.00239	418.2	0.00223	418.2	0.00165	418.2	0.00554	418.2	0.00603	418.2	0.00386	418.2	0.0019	418.2	0.00174	418.2	0.0038	418.2	0.00498
418.4	0.000617333	418.4	0.00447	418.4	0.00239	418.4	0.00054885	418.4	0.00191	418.4	0.00243	418.4	0.00224	418.4	0.00166	418.4	0.00554	418.4	0.00608	418.4	0.00391	418.4	0.00199	418.4	0.00175	418.4	0.00386	418.4	0.0051
418.6	0.000622759	418.6	0.00446	418.6	0.00238	418.6	0.000549039	418.6	0.00199	418.6	0.00248	418.6	0.00225	418.6	0.00178	418.6	0.00561	418.6	0.00613	418.6	0.00403	418.6	0.00208	418.6	0.00181	418.6	0.00395	418.6	0.00515
418.8	0.000622759	418.8	0.00446	418.8	0.00247	418.8	0.00055395	418.8	0.002	418.8	0.0025	418.8	0.00238	418.8	0.00182	418.8	0.00561	418.8	0.00618	418.8	0.00416	418.8	0.00216	418.8	0.00184	418.8	0.00409	418.8	0.00529
419	0.000622759	419	0.00445	419	0.00245	419	0.000597578	419	0.00202	419	0.00256	419	0.00265	419	0.00193	419	0.00565	419	0.00625	419	0.00418	419	0.00225	419	0.00192	419	0.00415	419	0.00552
419.2	0.000632359	419.2	0.00445	419.2	0.00246	419.2	0.000621564	419.2	0.00206	419.2	0.00262	419.2	0.00269	419.2	0.00205	419.2	0.0057	419.2	0.00633	419.2	0.00437	419.2	0.00231	419.2	0.00196	419.2	0.0042	419.2	0.00561
419.4	0.000699978	419.4	0.00451	419.4	0.00258	419.4	0.000666326	419.4	0.00213	419.4	0.00264	419.4	0.0027	419.4	0.00208	419.4	0.00582	419.4	0.0064	419.4	0.00445	419.4	0.00243	419.4	0.00198	419.4	0.00439	419.4	0.00569
419.6	0.00071083	419.6	0.00451	419.6	0.00273	419.6	0.000683135	419.6	0.00222	419.6	0.00268	419.6	0.00275	419.6	0.00216	419.6	0.00594	419.6	0.00645	419.6	0.00457	419.6	0.00253	419.6	0.00202	419.6	0.0045	419.6	0.00587
419.8	0.000766761	419.8	0.00454	419.8	0.00279	419.8	0.000715998	419.8	0.00223	419.8	0.00269	419.8	0.00275	419.8	0.00234	419.8	0.00596	419.8	0.00654	419.8	0.0047	419.8	0.00258	419.8	0.00215	419.8	0.00455	419.8	0.0059
420	0.000811006	420	0.00456	420	0.00259	420	0.000734696	420	0.00223	420	0.0027	420	0.0029	420	0.00251	420	0.006	420	0.00665	420	0.00488	420	0.00271	420	0.0022	420	0.00477	420	0.00602
420.2	0.000843145	420.2	0.00472	420.2	0.00271	420.2	0.000740174	420.2	0.00231	420.2	0.00284	420.2	0.00309	420.2	0.00255	420.2	0.00615	420.2	0.0067	420.2	0.00495	420.2	0.0028	420.2	0.00226	420.2	0.00494	420.2	0.00613
420.4	0.000852746	420.4	0.00479	420.4	0.00266	420.4	0.00074074	420.4	0.00249	420.4	0.00291	420.4	0.00312	420.4	0.00265	420.4	0.00637	420.4	0.0068	420.4	0.00513	420.4	0.00295	420.4	0.00239	420.4	0.00505	420.4	0.00631
420.6	0.000863598	420.6	0.00501	420.6	0.0027	420.6	0.000758872	420.6	0.00256	420.6	0.00292	420.6	0.00321	420.6	0.00272	420.6	0.00645	420.6	0.00683	420.6	0.00524	420.6	0.00308	420.6	0.00243	420.6	0.00509	420.6	0.00656
420.8	0.000944991	420.8	0.00506	420.8	0.0027	420.8	0.000794379	420.8	0.00258	420.8	0.00305	420.8	0.00335	420.8	0.00283	420.8	0.00655	420.8	0.00692	420.8	0.00532	420.8	0.00325	420.8	0.00256	420.8	0.00528	420.8	0.00665
421	0.000950834	421	0.00513	421	0.003	421	0.00081251	421	0.00258	421	0.00313	421	0.00349	421	0.00284	421	0.00656	421	0.00697	421	0.0055	421	0.00327	421	0.00257	421	0.00534	421	0.00665
421.2	0.000980887	421.2	0.00515	421.2	0.00317	421.2	0.000824786	421.2	0.00262	421.2	0.00322	421.2	0.00353	421.2	0.00293	421.2	0.0066	421.2	0.00712	421.2	0.00558	421.2	0.00344	421.2	0.00267	421.2	0.00554	421.2	0.00691
421.4	0.000998835	421.4	0.00523	421.4	0.00328	421.4	0.000862938	421.4	0.00262	421.4	0.0033	421.4	0.00364	421.4	0.00311	421.4	0.00673	421.4	0.00721	421.4	0.00564	421.4	0.00358	421.4	0.00288	421.4	0.00576	421.4	0.00706
421.6	0.00104	421.6	0.00526	421.6	0.00322	421.6	0.000968326	421.6	0.00265	421.6	0.00337	421.6	0.00378	421.6	0.0033	421.6	0.00689	421.6	0.0073	421.6	0.00574	421.6	0.00371	421.6	0.00292	421.6	0.00599	421.6	0.0071
421.8	0.00105	421.8	0.00529	421.8	0.00338	421.8	0.000979092	421.8	0.00269	421.8	0.00355	421.8	0.00405	421.8	0.00348	421.8	0.00699	421.8	0.00739	421.8	0.00585	421.8	0.00385	421.8	0.00297	421.8	0.00606	421.8	0.00711
422	0.00117	422	0.00532	422	0.00308	422	0.00105	422	0.00283	422	0.00368	422	0.00433	422	0.00361	422	0.00715	422	0.0075	422	0.00601	422	0.00407	422	0.00312	422	0.00615	422	0.00725
422.2	0.00119	422.2	0.00534	422.2	0.00364	422.2	0.00113	422.2	0.00301	422.2	0.00381	422.2	0.00449	422.2	0.00366	422.2	0.00737	422.2	0.00756	422.2	0.00618	422.2	0.00419	422.2	0.00325	422.2	0.00634	422.2	0.00762
422.4	0.00124	422.4	0.00537	422.4	0.00374	422.4	0.00118	422.4	0.00314	422.4	0.00397	422.4	0.00472	422.4	0.00384	422.4	0.00755	422.4	0.00772	422.4	0.00644	422.4	0.00435	422.4	0.00334	422.4	0.00659	422.4	0.00783
422.6	0.00128	422.6	0.00553	422.6	0.00371	422.6	0.00122	422.6	0.00329	422.6	0.00405	422.6	0.00497	422.6	0.00411	422.6	0.00772	422.6	0.0078	422.6	0.00648	422.6	0.00449	422.6	0.00342	422.6	0.0066	422.6	0.00802
422.8	0.00139	422.8	0.00555	422.8	0.0039	422.8	0.00124	422.8	0.00353	422.8	0.00412	422.8	0.00497	422.8	0.00418	422.8	0.00808	422.8	0.00794	422.8	0.00661	422.8	0.00465	422.8	0.00379	422.8	0.00681	422.8	0.00811
423	0.00153	423	0.00574	423	0.00374	423	0.00135	423	0.00354	423	0.00417	423	0.00517	423	0.00426	423	0.00832	423	0.00803	423	0.00678	423	0.00487	423	0.00381	423	0.00682	423	0.00812
423.2	0.00154	423.2	0.00578	423.2	0.00415	423.2	0.00141	423.2	0.00373	423.2	0.00427	423.2	0.0054	423.2	0.00436	423.2	0.00832	423.2	0.00816	423.2	0.00692	423.2	0.00507	423.2	0.0039	423.2	0.00702	423.2	0.00834
423.4	0.00162	423.4	0.00597	423.4	0.0042	423.4	0.00142	423.4	0.00387	423.4	0.00447	423.4	0.00562	423.4	0.00449	423.4	0.00841	423.4	0.00829	423.4	0.00709	423.4	0.00511	423.4	0.00393	423.4	0.00717	423.4	0.00835
423.6	0.00167	423.6	0.00625	423.6	0.00455	423.6	0.00148	423.6	0.00389	423.6	0.00465	423.6	0.00575	423.6	0.00484	423.6	0.00861	423.6	0.00842	423.6	0.00709	423.6	0.00523	423.6	0.00398	423.6	0.00746	423.6	0.00855
423.8	0.00182	423.8	0.00653	423.8	0.00474	423.8	0.00154	423.8	0.00404	423.8	0.00468	423.8	0.00584	423.8	0.00485	423.8	0.00861	423.8	0.00851	423.8	0.00735	423.8	0.00539	423.8	0.00418	423.8	0.00766	423.8	0.00857
424	0.00182	424	0.00655	424	0.00449	424	0.0017	424	0.00424	424	0.00488	424	0.00585	424	0.00502	424	0.00889	424	0.00864	424	0.00755	424	0.00555	424	0.0043	424	0.00772	424	0.00885
424.2	0.00189	424.2	0.00661	424.2	0.00493	424.2	0.00171	424.2	0.00461	424.2	0.00517	424.2	0.00603	424.2	0.0052	424.2	0.00891	424.2	0.00871	424.2	0.00782	424.2	0.00561	424.2	0.00431	424.2	0.00784	424.2	0.00888
424.4	0.00194	424.4	0.00687	424.4	0.00512	424.4	0.00176	424.4	0.00487	424.4	0.00554	424.4	0.00613	424.4	0.0054	424.4	0.00898	424.4	0.0089	424.4	0.00794	424.4	0.00581	424.4	0.00473	424.4	0.00794	424.4	0.00913
424.6	0.00222	424.6	0.00688	424.6	0.00524	424.6	0.00185	424.6	0.00513	424.6	0.00572	424.6	0.00642	424.6	0.00561	424.6	0.00922	424.6	0.00905	424.6	0.00797	424.6	0.00596	424.6	0.00473	424.6	0.00808	424.6	0.0094
424.8	0.00223	424.8	0.00715	424.8	0.00561	424.8	0.00192	424.8	0.00531	424.8	0.00592	424.8	0.00686	424.8	0.00571	424.8	0.00937	424.8	0.00918	424.8	0.00797	424.8	0.0061	424.8	0.00479	424.8	0.00825	424.8	0.00955
425	0.00236	425	0.00733	425	0.00547	425	0.00196	425	0.00535	425	0.00615	425	0.00689	425	0.00596	425	0.00959	425	0.00929	425	0.00808	425	0.0062	425	0.00496	425	0.00838	425	0.00956
425.2	0.00256	425.2	0.00741	425.2	0.00569	425.2	0.00218	425.2	0.00554	425.2	0.00633	425.2	0.00712	425.2	0.00622	425.2	0.00968	425.2	0.00939	425.2	0.00836	425.2	0.00642	425.2	0.00511	425.2	0.00842	425.2	0.00959
425.4	0.00265	425.4	0.00753	425.4	0.00586	425.4	0.00223	425.4	0.0059	425.4	0.00642	425.4	0.00774	425.4	0.00639	425.4	0.01014	425.4	0.0095	425.4	0.00841	425.4	0.00659	425.4	0.00519	425.4	0.00866	425.4	0.00968
425.6	0.00273	425.6	0.00754	425.6	0.00608	425.6	0.00228	425.6	0.00592	425.6	0.00677	425.6	0.00799	425.6	0.00674	425.6	0.01031	425.6	0.00964	425.6	0.00864	425.6	0.00676	425.6	0.00536	425.6	0.00874	425.6	0.00996
425.8	0.00292	425.8	0.00761	425.8	0.00642	425.8	0.00229	425.8	0.00612	425.8	0.00692	425.8	0.00802	425.8	0.00688	425.8	0.01047	425.8	0.00978	425.8	0.00878	425.8	0.00685	425.8	0.00553	425.8	0.00894	425.8	0.01023
426	0.00311	426	0.00789	426	0.00653	426	0.00246	426	0.00632	426	0.00705	426	0.00803	426	0.00699	426	0.01069	426	0.00992	426	0.00904	426	0.00705	426	0.00557	426	0.00913	426	0.01044
426.2	0.00348	426.2	0.00812	426.2	0.00675	426.2	0.00255	426.2	0.00634	426.2	0.00719	426.2	0.00812	426.2	0.00727	426.2	0.01092	426.2	0.01005	426.2	0.00921	426.2	0.00716	426.2	0.00557	426.2	0.00924	426.2	0.01048
426.4	0.00353	426.4	0.00849	426.4	0.00704	426.4	0.00276	426.4	0.00641	426.4	0.00735	426.4	0.00813	426.4	0.00745	426.4	0.01121	426.4	0.01024	426.4	0.00938	426.4	0.00745	426.4	0.00559	426.4	0.00943	426.4	0.0105
426.6	0.0036	426.6	0.00861	426.6	0.00711	426.6	0.00285	426.6	0.00683	426.6	0.00736	426.6	0.00849	426.6	0.00762	426.6	0.01121	426.6	0.01037	426.6	0.00946	426.6	0.00757	426.6	0.00565	426.6	0.0095	426.6	0.01061
426.8	0.0038	426.8	0.00886	426.8	0.00734	426.8	0.00302	426.8	0.00707	426.8	0.00788	426.8	0.00858	426.8	0.00782	426.8	0.01124	426.8	0.01051	426.8	0.00952	426.8	0.00773	426.8	0.00566	426.8	0.00964	426.8	0.01082
427	0.00399	427	0.00918	427	0.00785	427	0.00315	427	0.00709	427	0.00815	427	0.00881	427	0.00799	427	0.01135	427	0.01061	427	0.00965	427	0.00803	427	0.00575	427	0.00975	427	0.01096
427.2	0.0043	427.2	0.00954	427.2	0.00778	427.2	0.0033	427.2	0.00762	427.2	0.00844	427.2	0.00897	427.2	0.00815	427.2	0.0116	427.2	0.01075	427.2	0.00975	427.2	0.00835	427.2	0.00602	427.2	0.01007	427.2	0.01144
427.4	0.00446	427.4	0.00993	427.4	0.00834	427.4	0.00335	427.4	0.00786	427.4	0.00876	427.4	0.00908	427.4	0.00842	427.4	0.01196	427.4	0.01089	427.4	0.00988	427.4	0.00849	427.4	0.00619	427.4	0.01022	427.4	0.01159
427.6	0.0047	427.6	0.00994	427.6	0.00871	427.6	0.00359	427.6	0.00799	427.6	0.00897	427.6	0.00936	427.6	0.00877	427.6	0.01204	427.6	0.01107	427.6	0.01	427.6	0.00865	427.6	0.00649	427.6	0.01039	427.6	0.01175
427.8	0.00485	427.8	0.01033	427.8	0.00907	427.8	0.00364	427.8	0.00833	427.8	0.00922	427.8	0.0097	427.8	0.00904	427.8	0.01223	427.8	0.01118	427.8	0.01009	427.8	0.00882	427.8	0.00663	427.8	0.0106	427.8	0.01188
428	0.00511	428	0.01064	428	0.00902	428	0.0038	428	0.00869	428	0.00947	428	0.00971	428	0.00925	428	0.01251	428	0.01134	428	0.0102	428	0.0091	428	0.00673	428	0.01085	428	0.01226
428.2	0.0053	428.2	0.01077	428.2	0.00929	428.2	0.00399	428.2	0.0093	428.2	0.00977	428.2	0.00987	428.2	0.00956	428.2	0.01264	428.2	0.01146	428.2	0.01029	428.2	0.00925	428.2	0.00709	428.2	0.01095	428.2	0.01229
428.4	0.00582	428.4	0.01088	428.4	0.00944	428.4	0.00426	428.4	0.00934	428.4	0.01012	428.4	0.01016	428.4	0.00959	428.4	0.013	428.4	0.01162	428.4	0.0104	428.4	0.00945	428.4	0.00732	428.4	0.0113	428.4	0.01239
428.6	0.00592	428.6	0.01107	428.6	0.01025	428.6	0.00437	428.6	0.00935	428.6	0.01046	428.6	0.01055	428.6	0.0098	428.6	0.01314	428.6	0.01172	428.6	0.01044	428.6	0.00975	428.6	0.00742	428.6	0.01154	428.6	0.01248
428.8	0.00623	428.8	0.01177	428.8	0.01002	428.8	0.00466	428.8	0.00937	428.8	0.0107	428.8	0.01107	428.8	0.00985	428.8	0.01319	428.8	0.01188	428.8	0.01051	428.8	0.00995	428.8	0.00744	428.8	0.01156	428.8	0.01258
429	0.0066	429	0.012	429	0.0104	429	0.00488	429	0.00983	429	0.01071	429	0.01108	429	0.01012	429	0.0132	429	0.01199	429	0.01074	429	0.01015	429	0.00749	429	0.01167	429	0.01264
429.2	0.00687	429.2	0.01237	429.2	0.01026	429.2	0.00529	429.2	0.01023	429.2	0.01095	429.2	0.01112	429.2	0.01058	429.2	0.01332	429.2	0.01217	429.2	0.01097	429.2	0.01036	429.2	0.00801	429.2	0.01168	429.2	0.0128
429.4	0.00704	429.4	0.01254	429.4	0.01076	429.4	0.00559	429.4	0.01028	429.4	0.0112	429.4	0.01116	429.4	0.01061	429.4	0.01353	429.4	0.01234	429.4	0.01102	429.4	0.01042	429.4	0.00816	429.4	0.0118	429.4	0.01295
429.6	0.00756	429.6	0.01256	429.6	0.01148	429.6	0.00579	429.6	0.01037	429.6	0.01163	429.6	0.01126	429.6	0.0109	429.6	0.01363	429.6	0.01248	429.6	0.01133	429.6	0.01051	429.6	0.0083	429.6	0.01184	429.6	0.01299
429.8	0.00778	429.8	0.01284	429.8	0.01191	429.8	0.00592	429.8	0.01057	429.8	0.01178	429.8	0.01145	429.8	0.01092	429.8	0.01407	429.8	0.0126	429.8	0.01135	429.8	0.01071	429.8	0.00842	429.8	0.01188	429.8	0.01329
430	0.00805	430	0.01307	430	0.01174	430	0.00624	430	0.01094	430	0.01182	430	0.01146	430	0.01106	430	0.01413	430	0.01275	430	0.0115	430	0.01096	430	0.00862	430	0.01205	430	0.01364
430.2	0.0086	430.2	0.01342	430.2	0.012	430.2	0.00636	430.2	0.01151	430.2	0.01198	430.2	0.01151	430.2	0.01116	430.2	0.01426	430.2	0.01284	430.2	0.01162	430.2	0.01108	430.2	0.00869	430.2	0.01228	430.2	0.01374
430.4	0.00939	430.4	0.01384	430.4	0.01251	430.4	0.00656	430.4	0.01172	430.4	0.01222	430.4	0.01166	430.4	0.01133	430.4	0.01431	430.4	0.01298	430.4	0.01166	430.4	0.01135	430.4	0.0089	430.4	0.01242	430.4	0.01416
430.6	0.0097	430.6	0.01406	430.6	0.01258	430.6	0.00677	430.6	0.0118	430.6	0.0124	430.6	0.01174	430.6	0.01152	430.6	0.01438	430.6	0.01311	430.6	0.01167	430.6	0.01135	430.6	0.00895	430.6	0.01249	430.6	0.01451
430.8	0.00992	430.8	0.01463	430.8	0.01324	430.8	0.00702	430.8	0.01194	430.8	0.01259	430.8	0.01253	430.8	0.01159	430.8	0.01446	430.8	0.01327	430.8	0.01199	430.8	0.01159	430.8	0.00916	430.8	0.01265	430.8	0.01469
431	0.0104	431	0.01511	431	0.01379	431	0.00726	431	0.01207	431	0.01282	431	0.01254	431	0.01175	431	0.01453	431	0.01339	431	0.01206	431	0.01183	431	0.00939	431	0.01292	431	0.01479
431.2	0.011	431.2	0.01525	431.2	0.01415	431.2	0.0076	431.2	0.01264	431.2	0.01331	431.2	0.01292	431.2	0.01183	431.2	0.01471	431.2	0.01352	431.2	0.01245	431.2	0.01199	431.2	0.00962	431.2	0.01309	431.2	0.01498
431.4	0.01109	431.4	0.01528	431.4	0.01408	431.4	0.00774	431.4	0.01284	431.4	0.01349	431.4	0.01304	431.4	0.01217	431.4	0.01473	431.4	0.01368	431.4	0.01245	431.4	0.01216	431.4	0.00974	431.4	0.01314	431.4	0.0153
431.6	0.01147	431.6	0.01534	431.6	0.01425	431.6	0.00802	431.6	0.01322	431.6	0.01353	431.6	0.0131	431.6	0.01241	431.6	0.01497	431.6	0.0139	431.6	0.01261	431.6	0.01235	431.6	0.00981	431.6	0.01339	431.6	0.01556
431.8	0.01173	431.8	0.01595	431.8	0.01472	431.8	0.00816	431.8	0.01328	431.8	0.01372	431.8	0.0132	431.8	0.0125	431.8	0.01516	431.8	0.01402	431.8	0.01266	431.8	0.0125	431.8	0.00991	431.8	0.01354	431.8	0.01582
432	0.01229	432	0.01639	432	0.01448	432	0.00855	432	0.01333	432	0.01395	432	0.01326	432	0.01279	432	0.01518	432	0.01418	432	0.0127	432	0.01274	432	0.00999	432	0.01362	432	0.01582
432.2	0.01287	432.2	0.01641	432.2	0.01454	432.2	0.00889	432.2	0.01336	432.2	0.01398	432.2	0.01331	432.2	0.01296	432.2	0.01534	432.2	0.01432	432.2	0.01281	432.2	0.013	432.2	0.01007	432.2	0.01383	432.2	0.0162
432.4	0.01328	432.4	0.01675	432.4	0.01524	432.4	0.00929	432.4	0.01337	432.4	0.01398	432.4	0.01331	432.4	0.01305	432.4	0.01541	432.4	0.01454	432.4	0.01309	432.4	0.01311	432.4	0.01062	432.4	0.01397	432.4	0.01666
432.6	0.01352	432.6	0.01711	432.6	0.01561	432.6	0.00956	432.6	0.01352	432.6	0.01412	432.6	0.01332	432.6	0.01323	432.6	0.01542	432.6	0.01465	432.6	0.01335	432.6	0.01331	432.6	0.01066	432.6	0.01412	432.6	0.01702
432.8	0.0141	432.8	0.01738	432.8	0.01636	432.8	0.01014	432.8	0.01399	432.8	0.01432	432.8	0.0136	432.8	0.01343	432.8	0.01546	432.8	0.01489	432.8	0.01349	432.8	0.01357	432.8	0.01102	432.8	0.01426	432.8	0.01736
433	0.01451	433	0.01753	433	0.01652	433	0.01027	433	0.01428	433	0.01457	433	0.01373	433	0.01359	433	0.01553	433	0.01506	433	0.01355	433	0.01381	433	0.01127	433	0.01428	433	0.01748
433.2	0.01454	433.2	0.01767	433.2	0.01682	433.2	0.01052	433.2	0.01442	433.2	0.01462	433.2	0.01408	433.2	0.01371	433.2	0.01587	433.2	0.01525	433.2	0.01371	433.2	0.014	433.2	0.01166	433.2	0.01452	433.2	0.01778
433.4	0.01492	433.4	0.01782	433.4	0.01703	433.4	0.01082	433.4	0.01483	433.4	0.01462	433.4	0.01413	433.4	0.01376	433.4	0.01591	433.4	0.01541	433.4	0.01376	433.4	0.01401	433.4	0.01173	433.4	0.0146	433.4	0.01812
433.6	0.01497	433.6	0.01786	433.6	0.01684	433.6	0.01122	433.6	0.01493	433.6	0.01468	433.6	0.0142	433.6	0.01388	433.6	0.01594	433.6	0.01562	433.6	0.01391	433.6	0.01421	433.6	0.01198	433.6	0.0149	433.6	0.01859
433.8	0.01553	433.8	0.01792	433.8	0.01729	433.8	0.0113	433.8	0.01493	433.8	0.01474	433.8	0.01421	433.8	0.01389	433.8	0.01597	433.8	0.01583	433.8	0.01417	433.8	0.01427	433.8	0.01228	433.8	0.01514	433.8	0.0192
434	0.01586	434	0.01793	434	0.0176	434	0.01155	434	0.01494	434	0.01474	434	0.01433	434	0.01398	434	0.01601	434	0.01609	434	0.01435	434	0.0145	434	0.01242	434	0.0156	434	0.01989
434.2	0.01615	434.2	0.018	434.2	0.01767	434.2	0.01183	434.2	0.01499	434.2	0.01485	434.2	0.01483	434.2	0.01408	434.2	0.01606	434.2	0.01633	434.2	0.01481	434.2	0.0146	434.2	0.01251	434.2	0.01587	434.2	0.02026
434.4	0.01667	434.4	0.01803	434.4	0.01748	434.4	0.01196	434.4	0.01567	434.4	0.01524	434.4	0.01513	434.4	0.01416	434.4	0.01624	434.4	0.01658	434.4	0.01529	434.4	0.01494	434.4	0.01294	434.4	0.01623	434.4	0.02091
434.6	0.01699	434.6	0.01803	434.6	0.01776	434.6	0.01215	434.6	0.01572	434.6	0.01525	434.6	0.0152	434.6	0.01438	434.6	0.01647	434.6	0.01672	434.6	0.01559	434.6	0.01498	434.6	0.01345	434.6	0.0163	434.6	0.02099
434.8	0.01736	434.8	0.01818	434.8	0.01844	434.8	0.01231	434.8	0.01574	434.8	0.01534	434.8	0.01529	434.8	0.01474	434.8	0.01649	434.8	0.01705	434.8	0.01564	434.8	0.0153	434.8	0.01422	434.8	0.01672	434.8	0.02161
435	0.0178	435	0.01847	435	0.01832	435	0.01252	435	0.01574	435	0.01547	435	0.0153	435	0.01488	435	0.01653	435	0.01728	435	0.01592	435	0.01549	435	0.01422	435	0.01699	435	0.02238
435.2	0.01782	435.2	0.01853	435.2	0.01853	435.2	0.01258	435.2	0.01574	435.2	0.01568	435.2	0.01545	435.2	0.01508	435.2	0.01666	435.2	0.0176	435.2	0.01612	435.2	0.01579	435.2	0.01424	435.2	0.01734	435.2	0.02302
435.4	0.01793	435.4	0.01867	435.4	0.01854	435.4	0.01268	435.4	0.01574	435.4	0.01569	435.4	0.01571	435.4	0.01513	435.4	0.01668	435.4	0.01787	435.4	0.01667	435.4	0.01606	435.4	0.01425	435.4	0.01751	435.4	0.02348
435.6	0.01795	435.6	0.01871	435.6	0.01905	435.6	0.01303	435.6	0.01583	435.6	0.01572	435.6	0.01595	435.6	0.01538	435.6	0.01683	435.6	0.01827	435.6	0.01705	435.6	0.01632	435.6	0.01431	435.6	0.01789	435.6	0.0244
435.8	0.01795	435.8	0.01887	435.8	0.01927	435.8	0.01349	435.8	0.01584	435.8	0.01598	435.8	0.01595	435.8	0.01547	435.8	0.01684	435.8	0.01858	435.8	0.01731	435.8	0.01645	435.8	0.01445	435.8	0.0182	435.8	0.02475
436	0.01802	436	0.01887	436	0.01936	436	0.01351	436	0.01583	436	0.01603	436	0.01595	436	0.01563	436	0.01699	436	0.01894	436	0.01767	436	0.01656	436	0.01475	436	0.01862	436	0.0257
436.2	0.01837	436.2	0.0189	436.2	0.01956	436.2	0.01368	436.2	0.01584	436.2	0.01613	436.2	0.01597	436.2	0.01579	436.2	0.01723	436.2	0.01927	436.2	0.01804	436.2	0.01679	436.2	0.01518	436.2	0.01889	436.2	0.02645
436.4	0.01847	436.4	0.01904	436.4	0.01935	436.4	0.01407	436.4	0.01586	436.4	0.01619	436.4	0.01607	436.4	0.01607	436.4	0.01751	436.4	0.01976	436.4	0.01854	436.4	0.01711	436.4	0.0156	436.4	0.01935	436.4	0.02745
436.6	0.01861	436.6	0.01912	436.6	0.01979	436.6	0.01423	436.6	0.01587	436.6	0.01628	436.6	0.01613	436.6	0.01617	436.6	0.01755	436.6	0.02012	436.6	0.01898	436.6	0.01745	436.6	0.01588	436.6	0.01959	436.6	0.02867
436.8	0.01864	436.8	0.01917	436.8	0.02072	436.8	0.01453	436.8	0.01587	436.8	0.01652	436.8	0.01652	436.8	0.01618	436.8	0.01756	436.8	0.0206	436.8	0.01945	436.8	0.01772	436.8	0.01671	436.8	0.02023	436.8	0.02956
437	0.01888	437	0.01944	437	0.01998	437	0.01454	437	0.01587	437	0.01655	437	0.01655	437	0.01637	437	0.01789	437	0.02099	437	0.01976	437	0.01801	437	0.01705	437	0.02092	437	0.03069
437.2	0.0189	437.2	0.01947	437.2	0.0203	437.2	0.01471	437.2	0.01587	437.2	0.01667	437.2	0.01671	437.2	0.01662	437.2	0.0181	437.2	0.02156	437.2	0.02015	437.2	0.01842	437.2	0.01749	437.2	0.02144	437.2	0.03194
437.4	0.01891	437.4	0.01956	437.4	0.02042	437.4	0.01487	437.4	0.01587	437.4	0.01667	437.4	0.01687	437.4	0.01685	437.4	0.01818	437.4	0.02202	437.4	0.02074	437.4	0.01878	437.4	0.01787	437.4	0.02174	437.4	0.03306
437.6	0.01892	437.6	0.01956	437.6	0.02066	437.6	0.01492	437.6	0.01585	437.6	0.01668	437.6	0.01709	437.6	0.01733	437.6	0.01859	437.6	0.02269	437.6	0.02152	437.6	0.01915	437.6	0.01833	437.6	0.02242	437.6	0.034
437.8	0.01891	437.8	0.01956	437.8	0.02128	437.8	0.01493	437.8	0.01585	437.8	0.01698	437.8	0.01736	437.8	0.01748	437.8	0.01872	437.8	0.02323	437.8	0.02186	437.8	0.01948	437.8	0.01871	437.8	0.02287	437.8	0.0353
438	0.01891	438	0.01965	438	0.02131	438	0.01504	438	0.01585	438	0.017	438	0.01774	438	0.01788	438	0.01905	438	0.02397	438	0.02281	438	0.02006	438	0.01965	438	0.02395	438	0.03697
438.2	0.0189	438.2	0.01967	438.2	0.02097	438.2	0.01506	438.2	0.01585	438.2	0.01701	438.2	0.01786	438.2	0.01789	438.2	0.01912	438.2	0.02449	438.2	0.02353	438.2	0.02047	438.2	0.01978	438.2	0.02454	438.2	0.03822
438.4	0.0189	438.4	0.0197	438.4	0.02198	438.4	0.01528	438.4	0.016	438.4	0.01705	438.4	0.01806	438.4	0.0184	438.4	0.01958	438.4	0.02523	438.4	0.02434	438.4	0.02092	438.4	0.02067	438.4	0.02557	438.4	0.03961
438.6	0.01885	438.6	0.0197	438.6	0.02143	438.6	0.01557	438.6	0.01629	438.6	0.01732	438.6	0.01825	438.6	0.01867	438.6	0.01961	438.6	0.0259	438.6	0.02514	438.6	0.02113	438.6	0.02141	438.6	0.02632	438.6	0.04079
438.8	0.01878	438.8	0.01971	438.8	0.02218	438.8	0.0157	438.8	0.01643	438.8	0.01737	438.8	0.01862	438.8	0.01926	438.8	0.02004	438.8	0.02678	438.8	0.0261	438.8	0.02179	438.8	0.02176	438.8	0.02729	438.8	0.04277
439	0.01862	439	0.01987	439	0.02276	439	0.01576	439	0.01658	439	0.01741	439	0.01875	439	0.01966	439	0.0204	439	0.02753	439	0.02664	439	0.0223	439	0.02278	439	0.028	439	0.04378
439.2	0.01876	439.2	0.01987	439.2	0.02224	439.2	0.01592	439.2	0.017	439.2	0.0176	439.2	0.01937	439.2	0.02011	439.2	0.02073	439.2	0.02844	439.2	0.02788	439.2	0.02293	439.2	0.02388	439.2	0.02895	439.2	0.04601
439.4	0.0186	439.4	0.01987	439.4	0.02254	439.4	0.01594	439.4	0.01707	439.4	0.01779	439.4	0.01974	439.4	0.02055	439.4	0.02079	439.4	0.02915	439.4	0.02875	439.4	0.02345	439.4	0.02448	439.4	0.02959	439.4	0.04716
439.6	0.0186	439.6	0.01987	439.6	0.02251	439.6	0.01622	439.6	0.01718	439.6	0.0181	439.6	0.01985	439.6	0.02081	439.6	0.02155	439.6	0.03014	439.6	0.02943	439.6	0.02413	439.6	0.02524	439.6	0.03073	439.6	0.0491
439.8	0.01858	439.8	0.02004	439.8	0.02234	439.8	0.01644	439.8	0.01718	439.8	0.0181	439.8	0.02096	439.8	0.02091	439.8	0.02176	439.8	0.031	439.8	0.03006	439.8	0.02476	439.8	0.02543	439.8	0.03165	439.8	0.04987
440	0.01858	440	0.02009	440	0.02376	440	0.01671	440	0.01726	440	0.01825	440	0.02151	440	0.02162	440	0.02277	440	0.03215	440	0.03162	440	0.02543	440	0.02618	440	0.03304	440	0.05223
440.2	0.01852	440.2	0.0201	440.2	0.02352	440.2	0.01676	440.2	0.01726	440.2	0.01842	440.2	0.0217	440.2	0.02205	440.2	0.02313	440.2	0.03304	440.2	0.03273	440.2	0.02617	440.2	0.02729	440.2	0.03399	440.2	0.05408
440.4	0.0186	440.4	0.02041	440.4	0.02342	440.4	0.01686	440.4	0.01728	440.4	0.01862	440.4	0.02232	440.4	0.02277	440.4	0.02369	440.4	0.03438	440.4	0.03417	440.4	0.02679	440.4	0.0283	440.4	0.03553	440.4	0.057
440.6	0.0186	440.6	0.02057	440.6	0.02406	440.6	0.0169	440.6	0.01734	440.6	0.01884	440.6	0.02338	440.6	0.02322	440.6	0.02419	440.6	0.03549	440.6	0.0353	440.6	0.02756	440.6	0.02886	440.6	0.03695	440.6	0.05891
440.8	0.01842	440.8	0.02059	440.8	0.02487	440.8	0.01711	440.8	0.01801	440.8	0.01931	440.8	0.02373	440.8	0.02401	440.8	0.02478	440.8	0.0369	440.8	0.037	440.8	0.0286	440.8	0.02995	440.8	0.03882	440.8	0.06162
441	0.01842	441	0.0206	441	0.02392	441	0.01735	441	0.01809	441	0.01946	441	0.02424	441	0.02467	441	0.02515	441	0.03793	441	0.03809	441	0.02918	441	0.03146	441	0.04018	441	0.06374
441.2	0.01842	441.2	0.02063	441.2	0.02477	441.2	0.01779	441.2	0.01865	441.2	0.02007	441.2	0.02481	441.2	0.02552	441.2	0.02616	441.2	0.0394	441.2	0.03976	441.2	0.03032	441.2	0.03251	441.2	0.04173	441.2	0.06583
441.4	0.0186	441.4	0.02078	441.4	0.02498	441.4	0.01806	441.4	0.01897	441.4	0.02032	441.4	0.02604	441.4	0.02603	441.4	0.02682	441.4	0.04067	441.4	0.04094	441.4	0.03117	441.4	0.03373	441.4	0.04285	441.4	0.0684
441.6	0.0186	441.6	0.02082	441.6	0.02547	441.6	0.01808	441.6	0.01928	441.6	0.02073	441.6	0.02682	441.6	0.02706	441.6	0.02742	441.6	0.04221	441.6	0.04302	441.6	0.03233	441.6	0.03462	441.6	0.04477	441.6	0.07171
441.8	0.0186	441.8	0.021	441.8	0.02574	441.8	0.01822	441.8	0.01938	441.8	0.02089	441.8	0.02807	441.8	0.02746	441.8	0.02786	441.8	0.04358	441.8	0.04422	441.8	0.03331	441.8	0.03533	441.8	0.0464	441.8	0.07508
442	0.0186	442	0.02109	442	0.02587	442	0.01842	442	0.01939	442	0.02151	442	0.02988	442	0.02864	442	0.02912	442	0.04561	442	0.04674	442	0.03478	442	0.03696	442	0.04861	442	0.07877
442.2	0.01868	442.2	0.02126	442.2	0.02662	442.2	0.01862	442.2	0.01964	442.2	0.02176	442.2	0.03071	442.2	0.02949	442.2	0.02998	442.2	0.04728	442.2	0.04803	442.2	0.03592	442.2	0.03797	442.2	0.05032	442.2	0.08169
442.4	0.01878	442.4	0.02173	442.4	0.02689	442.4	0.01873	442.4	0.02114	442.4	0.02229	442.4	0.03132	442.4	0.03085	442.4	0.03129	442.4	0.04931	442.4	0.05042	442.4	0.03743	442.4	0.03969	442.4	0.05285	442.4	0.0853
442.6	0.01881	442.6	0.02204	442.6	0.028	442.6	0.01917	442.6	0.02122	442.6	0.02311	442.6	0.0321	442.6	0.03166	442.6	0.03189	442.6	0.051	442.6	0.05249	442.6	0.0386	442.6	0.04107	442.6	0.05465	442.6	0.08798
442.8	0.01924	442.8	0.02255	442.8	0.02864	442.8	0.01964	442.8	0.02141	442.8	0.02381	442.8	0.03386	442.8	0.03292	442.8	0.03308	442.8	0.05309	442.8	0.0551	442.8	0.0402	442.8	0.04257	442.8	0.0569	442.8	0.09194
443	0.0193	443	0.02318	443	0.0286	443	0.01987	443	0.02142	443	0.02443	443	0.03508	443	0.03384	443	0.03406	443	0.0548	443	0.05643	443	0.04134	443	0.04398	443	0.05899	443	0.09605
443.2	0.01944	443.2	0.0232	443.2	0.02915	443.2	0.02038	443.2	0.02238	443.2	0.02526	443.2	0.03653	443.2	0.03508	443.2	0.03549	443.2	0.05716	443.2	0.05843	443.2	0.04286	443.2	0.04595	443.2	0.06142	443.2	0.10133
443.4	0.01951	443.4	0.02348	443.4	0.0303	443.4	0.02085	443.4	0.02303	443.4	0.02609	443.4	0.03827	443.4	0.03629	443.4	0.03623	443.4	0.05904	443.4	0.06104	443.4	0.04413	443.4	0.04752	443.4	0.06353	443.4	0.10488
443.6	0.01963	443.6	0.02387	443.6	0.03105	443.6	0.02129	443.6	0.02363	443.6	0.02698	443.6	0.03942	443.6	0.03785	443.6	0.03775	443.6	0.06185	443.6	0.06397	443.6	0.04608	443.6	0.04971	443.6	0.06631	443.6	0.10951
443.8	0.01981	443.8	0.02413	443.8	0.03163	443.8	0.02157	443.8	0.0245	443.8	0.02777	443.8	0.04096	443.8	0.03938	443.8	0.03885	443.8	0.06395	443.8	0.06632	443.8	0.04804	443.8	0.05083	443.8	0.06865	443.8	0.11326
444	0.01996	444	0.02501	444	0.03224	444	0.02197	444	0.02513	444	0.02843	444	0.04221	444	0.0412	444	0.04063	444	0.06671	444	0.06924	444	0.05019	444	0.05311	444	0.07142	444	0.11893
444.2	0.02005	444.2	0.02555	444.2	0.03257	444.2	0.02232	444.2	0.02556	444.2	0.02919	444.2	0.04321	444.2	0.04282	444.2	0.0418	444.2	0.06887	444.2	0.07144	444.2	0.05192	444.2	0.05525	444.2	0.07372	444.2	0.12289
444.4	0.02049	444.4	0.02631	444.4	0.03353	444.4	0.02295	444.4	0.02644	444.4	0.02993	444.4	0.04481	444.4	0.04416	444.4	0.04358	444.4	0.07181	444.4	0.07442	444.4	0.05356	444.4	0.05767	444.4	0.07669	444.4	0.12874
444.6	0.02058	444.6	0.02707	444.6	0.03446	444.6	0.02333	444.6	0.02702	444.6	0.03085	444.6	0.04678	444.6	0.04593	444.6	0.04504	444.6	0.07408	444.6	0.0769	444.6	0.05479	444.6	0.06032	444.6	0.0795	444.6	0.13322
444.8	0.0207	444.8	0.02769	444.8	0.03571	444.8	0.0238	444.8	0.02802	444.8	0.03217	444.8	0.0482	444.8	0.04736	444.8	0.0465	444.8	0.0773	444.8	0.0802	444.8	0.05694	444.8	0.0626	444.8	0.08258	444.8	0.14
445	0.02103	445	0.02826	445	0.03621	445	0.02455	445	0.02975	445	0.0329	445	0.04893	445	0.04866	445	0.04792	445	0.08015	445	0.08262	445	0.05902	445	0.064	445	0.08552	445	0.14553
445.2	0.02126	445.2	0.02877	445.2	0.03743	445.2	0.02537	445.2	0.03009	445.2	0.03435	445.2	0.05061	445.2	0.0512	445.2	0.04983	445.2	0.08406	445.2	0.08636	445.2	0.06148	445.2	0.06707	445.2	0.08921	445.2	0.15224
445.4	0.0217	445.4	0.0294	445.4	0.03781	445.4	0.02612	445.4	0.03052	445.4	0.03544	445.4	0.05246	445.4	0.0528	445.4	0.05167	445.4	0.08708	445.4	0.08917	445.4	0.06371	445.4	0.06945	445.4	0.09284	445.4	0.15955
445.6	0.02232	445.6	0.03005	445.6	0.03938	445.6	0.02682	445.6	0.03193	445.6	0.03726	445.6	0.05522	445.6	0.05491	445.6	0.05328	445.6	0.09118	445.6	0.09324	445.6	0.06691	445.6	0.07229	445.6	0.09728	445.6	0.16786
445.8	0.02242	445.8	0.03055	445.8	0.041	445.8	0.02735	445.8	0.03263	445.8	0.03848	445.8	0.05708	445.8	0.05659	445.8	0.05498	445.8	0.09435	445.8	0.0965	445.8	0.06912	445.8	0.07531	445.8	0.1007	445.8	0.17394
446	0.02299	446	0.03159	446	0.04205	446	0.02844	446	0.03414	446	0.04004	446	0.05943	446	0.05921	446	0.05688	446	0.09886	446	0.10074	446	0.07189	446	0.07788	446	0.1054	446	0.18344
446.2	0.02409	446.2	0.03226	446.2	0.04221	446.2	0.02962	446.2	0.03569	446.2	0.04055	446.2	0.06216	446.2	0.06111	446.2	0.05837	446.2	0.10218	446.2	0.10481	446.2	0.07409	446.2	0.08118	446.2	0.10911	446.2	0.19008
446.4	0.0245	446.4	0.03416	446.4	0.04467	446.4	0.03077	446.4	0.03703	446.4	0.04216	446.4	0.06448	446.4	0.0639	446.4	0.06096	446.4	0.1069	446.4	0.11014	446.4	0.07737	446.4	0.08505	446.4	0.114	446.4	0.2011
446.6	0.02468	446.6	0.03461	446.6	0.04627	446.6	0.03126	446.6	0.03786	446.6	0.04334	446.6	0.06758	446.6	0.06599	446.6	0.06358	446.6	0.11117	446.6	0.11445	446.6	0.08014	446.6	0.08835	446.6	0.11773	446.6	0.20879
446.8	0.02563	446.8	0.03614	446.8	0.04782	446.8	0.03262	446.8	0.03958	446.8	0.04559	446.8	0.0705	446.8	0.06879	446.8	0.06631	446.8	0.1172	446.8	0.12058	446.8	0.08403	446.8	0.09343	446.8	0.12406	446.8	0.22099
447	0.0261	447	0.03686	447	0.04907	447	0.03371	447	0.04166	447	0.04693	447	0.07218	447	0.07115	447	0.06875	447	0.12213	447	0.12511	447	0.08735	447	0.09734	447	0.12968	447	0.23059
447.2	0.02691	447.2	0.03812	447.2	0.0507	447.2	0.03502	447.2	0.04339	447.2	0.04942	447.2	0.07611	447.2	0.07446	447.2	0.0714	447.2	0.12886	447.2	0.13183	447.2	0.09183	447.2	0.10227	447.2	0.13669	447.2	0.24401
447.4	0.02767	447.4	0.03942	447.4	0.05318	447.4	0.03607	447.4	0.0443	447.4	0.0511	447.4	0.07851	447.4	0.07719	447.4	0.07366	447.4	0.13379	447.4	0.1369	447.4	0.0949	447.4	0.10567	447.4	0.14155	447.4	0.25465
447.6	0.02825	447.6	0.04126	447.6	0.05485	447.6	0.03796	447.6	0.04576	447.6	0.05299	447.6	0.08157	447.6	0.08013	447.6	0.07685	447.6	0.1404	447.6	0.14438	447.6	0.09947	447.6	0.1107	447.6	0.14943	447.6	0.26877
447.8	0.02919	447.8	0.04217	447.8	0.05668	447.8	0.03878	447.8	0.04741	447.8	0.05481	447.8	0.08408	447.8	0.08271	447.8	0.07976	447.8	0.14567	447.8	0.15032	447.8	0.10304	447.8	0.11582	447.8	0.15505	447.8	0.27997
448	0.03027	448	0.04357	448	0.05804	448	0.04048	448	0.04953	448	0.05681	448	0.08708	448	0.08629	448	0.08354	448	0.15374	448	0.15813	448	0.10825	448	0.12099	448	0.16349	448	0.29544
448.2	0.03058	448.2	0.04494	448.2	0.06002	448.2	0.04163	448.2	0.05167	448.2	0.05895	448.2	0.09061	448.2	0.08964	448.2	0.08598	448.2	0.16013	448.2	0.16522	448.2	0.11234	448.2	0.12685	448.2	0.17165	448.2	0.30831
448.4	0.03224	448.4	0.047	448.4	0.06245	448.4	0.04344	448.4	0.05451	448.4	0.06215	448.4	0.09392	448.4	0.09384	448.4	0.08955	448.4	0.16977	448.4	0.17451	448.4	0.11811	448.4	0.13356	448.4	0.18178	448.4	0.32566
448.6	0.03295	448.6	0.04775	448.6	0.06614	448.6	0.04484	448.6	0.05622	448.6	0.06436	448.6	0.09772	448.6	0.09796	448.6	0.09339	448.6	0.17751	448.6	0.18293	448.6	0.12304	448.6	0.1391	448.6	0.18923	448.6	0.34075
448.8	0.0342	448.8	0.04978	448.8	0.0669	448.8	0.0465	448.8	0.05814	448.8	0.06715	448.8	0.10374	448.8	0.10269	448.8	0.09759	448.8	0.1876	448.8	0.19261	448.8	0.12954	448.8	0.14762	448.8	0.20104	448.8	0.35772
449	0.0357	449	0.05151	449	0.06852	449	0.04812	449	0.06004	449	0.06911	449	0.10689	449	0.10598	449	0.10119	449	0.19489	449	0.20119	449	0.13426	449	0.15269	449	0.21018	449	0.37302
449.2	0.0368	449.2	0.05315	449.2	0.07101	449.2	0.04998	449.2	0.06269	449.2	0.07185	449.2	0.11161	449.2	0.11058	449.2	0.10574	449.2	0.20475	449.2	0.21213	449.2	0.14087	449.2	0.15996	449.2	0.222	449.2	0.39145
449.4	0.03787	449.4	0.05419	449.4	0.07394	449.4	0.05171	449.4	0.06426	449.4	0.07402	449.4	0.11531	449.4	0.11406	449.4	0.10812	449.4	0.21293	449.4	0.22029	449.4	0.14558	449.4	0.16624	449.4	0.23072	449.4	0.40571
449.6	0.0395	449.6	0.05633	449.6	0.07658	449.6	0.05356	449.6	0.06682	449.6	0.07692	449.6	0.12217	449.6	0.11988	449.6	0.11395	449.6	0.2247	449.6	0.23334	449.6	0.15334	449.6	0.17392	449.6	0.24366	449.6	0.42588
449.8	0.04142	449.8	0.05846	449.8	0.08027	449.8	0.05519	449.8	0.069	449.8	0.0795	449.8	0.12578	449.8	0.12436	449.8	0.11744	449.8	0.23401	449.8	0.24422	449.8	0.15911	449.8	0.18165	449.8	0.25519	449.8	0.44118
450	0.04286	450	0.06074	450	0.08311	450	0.05815	450	0.07192	450	0.08321	450	0.13439	450	0.13084	450	0.12312	450	0.24724	450	0.25945	450	0.16781	450	0.19255	450	0.27108	450	0.4617
450.2	0.04453	450.2	0.06248	450.2	0.08604	450.2	0.05993	450.2	0.07386	450.2	0.08574	450.2	0.1392	450.2	0.13647	450.2	0.12827	450.2	0.25822	450.2	0.27207	450.2	0.17526	450.2	0.20093	450.2	0.28486	450.2	0.47874
450.4	0.04666	450.4	0.06491	450.4	0.08802	450.4	0.06235	450.4	0.07741	450.4	0.0894	450.4	0.14707	450.4	0.1441	450.4	0.13457	450.4	0.27246	450.4	0.28947	450.4	0.18449	450.4	0.2108	450.4	0.30146	450.4	0.50169
450.6	0.04787	450.6	0.0667	450.6	0.09288	450.6	0.06444	450.6	0.07895	450.6	0.09283	450.6	0.15272	450.6	0.15037	450.6	0.1399	450.6	0.28345	450.6	0.30209	450.6	0.19183	450.6	0.21815	450.6	0.31482	450.6	0.51873
450.8	0.05013	450.8	0.06829	450.8	0.09627	450.8	0.06697	450.8	0.08303	450.8	0.0964	450.8	0.16189	450.8	0.15905	450.8	0.14791	450.8	0.29768	450.8	0.32014	450.8	0.20158	450.8	0.22989	450.8	0.33212	450.8	0.5389
451	0.05109	451	0.06988	451	0.09835	451	0.06899	451	0.08532	451	0.09894	451	0.1668	451	0.16574	451	0.15305	451	0.30923	451	0.33298	451	0.20976	451	0.23715	451	0.3466	451	0.55698
451.2	0.05292	451.2	0.07251	451.2	0.1027	451.2	0.07134	451.2	0.08873	451.2	0.10504	451.2	0.17717	451.2	0.17551	451.2	0.16156	451.2	0.32526	451.2	0.353	451.2	0.22025	451.2	0.24874	451.2	0.36728	451.2	0.58132
451.4	0.05447	451.4	0.07414	451.4	0.10792	451.4	0.07377	451.4	0.09142	451.4	0.10877	451.4	0.18485	451.4	0.18297	451.4	0.16856	451.4	0.33838	451.4	0.36801	451.4	0.22905	451.4	0.26015	451.4	0.38373	451.4	0.5994
451.6	0.05697	451.6	0.07702	451.6	0.11374	451.6	0.07712	451.6	0.09567	451.6	0.114	451.6	0.19726	451.6	0.19472	451.6	0.17894	451.6	0.35721	451.6	0.39172	451.6	0.24258	451.6	0.27509	451.6	0.40609	451.6	0.62409
451.8	0.05893	451.8	0.07955	451.8	0.11825	451.8	0.07987	451.8	0.10019	451.8	0.11904	451.8	0.20708	451.8	0.20366	451.8	0.1876	451.8	0.3729	451.8	0.41152	451.8	0.25296	451.8	0.28576	451.8	0.42536	451.8	0.64183
452	0.06119	452	0.08228	452	0.12458	452	0.08303	452	0.1047	452	0.12526	452	0.22078	452	0.21594	452	0.1992	452	0.39218	452	0.43458	452	0.26806	452	0.2993	452	0.45025	452	0.66721
452.2	0.06223	452.2	0.08387	452.2	0.12944	452.2	0.08546	452.2	0.10913	452.2	0.12991	452.2	0.2306	452.2	0.22511	452.2	0.20763	452.2	0.40676	452.2	0.4522	452.2	0.27939	452.2	0.31122	452.2	0.46867	452.2	0.68529
452.4	0.06473	452.4	0.08769	452.4	0.1342	452.4	0.08917	452.4	0.11312	452.4	0.13685	452.4	0.24338	452.4	0.2394	452.4	0.21905	452.4	0.42626	452.4	0.47678	452.4	0.29313	452.4	0.32389	452.4	0.49258	452.4	0.70616
452.6	0.06632	452.6	0.09007	452.6	0.13881	452.6	0.0923	452.6	0.11824	452.6	0.14214	452.6	0.25523	452.6	0.25091	452.6	0.22887	452.6	0.44106	452.6	0.49375	452.6	0.30508	452.6	0.33548	452.6	0.51044	452.6	0.72389
452.8	0.06941	452.8	0.09434	452.8	0.14665	452.8	0.09691	452.8	0.12441	452.8	0.15034	452.8	0.27097	452.8	0.26648	452.8	0.24345	452.8	0.46214	452.8	0.52029	452.8	0.32196	452.8	0.35075	452.8	0.53702	452.8	0.74719
453	0.07091	453	0.09762	453	0.15724	453	0.10088	453	0.12909	453	0.15716	453	0.28255	453	0.27778	453	0.25592	453	0.47895	453	0.5414	453	0.33538	453	0.36234	453	0.55699	453	0.76632
453.2	0.07346	453.2	0.10233	453.2	0.16276	453.2	0.1056	453.2	0.13656	453.2	0.16732	453.2	0.3019	453.2	0.29654	453.2	0.27392	453.2	0.50238	453.2	0.56859	453.2	0.35436	453.2	0.37994	453.2	0.58512	453.2	0.78857
453.4	0.0758	453.4	0.10556	453.4	0.17005	453.4	0.10953	453.4	0.14437	453.4	0.17563	453.4	0.3181	453.4	0.31104	453.4	0.28719	453.4	0.52099	453.4	0.59143	453.4	0.36978	453.4	0.39195	453.4	0.60805	453.4	0.807
453.6	0.07914	453.6	0.10958	453.6	0.17759	453.6	0.11428	453.6	0.15115	453.6	0.18604	453.6	0.33857	453.6	0.33002	453.6	0.3043	453.6	0.54307	453.6	0.61711	453.6	0.38876	453.6	0.40774	453.6	0.63505	453.6	0.82822
453.8	0.08181	453.8	0.11266	453.8	0.18817	453.8	0.1187	453.8	0.158	453.8	0.19406	453.8	0.35385	453.8	0.34559	453.8	0.3171	453.8	0.56034	453.8	0.63864	453.8	0.40365	453.8	0.41928	453.8	0.65544	453.8	0.84352
454	0.08535	454	0.11747	454	0.19435	454	0.12407	454	0.16521	454	0.20482	454	0.37718	454	0.36542	454	0.33525	454	0.58152	454	0.66344	454	0.42085	454	0.43446	454	0.67963	454	0.86299
454.2	0.0884	454.2	0.12228	454.2	0.20397	454.2	0.12826	454.2	0.17346	454.2	0.2144	454.2	0.39292	454.2	0.38034	454.2	0.35013	454.2	0.59812	454.2	0.68411	454.2	0.43584	454.2	0.44754	454.2	0.69805	454.2	0.8769
454.4	0.09162	454.4	0.12705	454.4	0.21582	454.4	0.13549	454.4	0.185	454.4	0.22752	454.4	0.41552	454.4	0.40167	454.4	0.37125	454.4	0.61941	454.4	0.71152	454.4	0.45598	454.4	0.46328	454.4	0.72295	454.4	0.89011
454.6	0.09424	454.6	0.13186	454.6	0.22671	454.6	0.14076	454.6	0.19394	454.6	0.23856	454.6	0.43348	454.6	0.41979	454.6	0.39	454.6	0.63713	454.6	0.73284	454.6	0.47296	454.6	0.47483	454.6	0.74362	454.6	0.90159
454.8	0.09884	454.8	0.13926	454.8	0.24073	454.8	0.14872	454.8	0.20636	454.8	0.25399	454.8	0.45858	454.8	0.44346	454.8	0.41529	454.8	0.66145	454.8	0.75873	454.8	0.49446	454.8	0.49159	454.8	0.76795	454.8	0.91689
455	0.10209	455	0.14481	455	0.25111	455	0.15604	455	0.21591	455	0.26804	455	0.47821	455	0.4635	455	0.43463	455	0.67973	455	0.77897	455	0.5126	455	0.50323	455	0.78947	455	0.92837
455.2	0.10652	455.2	0.15231	455.2	0.26316	455.2	0.16484	455.2	0.22728	455.2	0.286	455.2	0.50525	455.2	0.48973	455.2	0.45993	455.2	0.70147	455.2	0.80311	455.2	0.53536	455.2	0.51813	455.2	0.81309	455.2	0.94123
455.4	0.11077	455.4	0.15797	455.4	0.27785	455.4	0.17147	455.4	0.23674	455.4	0.29821	455.4	0.52284	455.4	0.50935	455.4	0.47748	455.4	0.71862	455.4	0.81921	455.4	0.55203	455.4	0.53116	455.4	0.8318	455.4	0.94993
455.6	0.11574	455.6	0.16586	455.6	0.28676	455.6	0.18105	455.6	0.25228	455.6	0.31571	455.6	0.54849	455.6	0.536	455.6	0.50456	455.6	0.73981	455.6	0.83901	455.6	0.5729	455.6	0.54699	455.6	0.85205	455.6	0.95827
455.8	0.12071	455.8	0.17057	455.8	0.30033	455.8	0.18919	455.8	0.2653	455.8	0.32976	455.8	0.56664	455.8	0.55541	455.8	0.52331	455.8	0.75472	455.8	0.85641	455.8	0.59062	455.8	0.5577	455.8	0.86907	455.8	0.96453
456	0.12751	456	0.18084	456	0.3136	456	0.20033	456	0.2851	456	0.35026	456	0.59377	456	0.58078	456	0.54949	456	0.77512	456	0.87686	456	0.61348	456	0.57167	456	0.88637	456	0.97496
456.2	0.13252	456.2	0.18829	456.2	0.33355	456.2	0.20997	456.2	0.29881	456.2	0.36777	456.2	0.61581	456.2	0.60083	456.2	0.57062	456.2	0.7916	456.2	0.89253	456.2	0.63026	456.2	0.58564	456.2	0.90324	456.2	0.98087
456.4	0.14058	456.4	0.20169	456.4	0.35112	456.4	0.22337	456.4	0.3193	456.4	0.39264	456.4	0.64211	456.4	0.6294	456.4	0.59829	456.4	0.81223	456.4	0.91146	456.4	0.65385	456.4	0.5996	456.4	0.92054	456.4	0.98783
456.6	0.14746	456.6	0.2127	456.6	0.37299	456.6	0.23565	456.6	0.33528	456.6	0.4136	456.6	0.66581	456.6	0.65307	456.6	0.6215	456.6	0.82804	456.6	0.92516	456.6	0.67294	456.6	0.61078	456.6	0.93418	456.6	0.99305
456.8	0.15761	456.8	0.22764	456.8	0.38605	456.8	0.25189	456.8	0.35559	456.8	0.4394	456.8	0.69192	456.8	0.68058	456.8	0.65185	456.8	0.84743	456.8	0.93908	456.8	0.69464	456.8	0.62567	456.8	0.94754	456.8	0.99722
457	0.16408	457	0.23727	457	0.40793	457	0.26379	457	0.37469	457	0.4599	457	0.71943	457	0.70126	457	0.67328	457	0.862	457	0.95214	457	0.7109	457	0.63638	457	0.95795	457	0.99965
457.2	0.17338	457.2	0.25176	457.2	0.42292	457.2	0.28041	457.2	0.39856	457.2	0.48569	457.2	0.74813	457.2	0.72877	457.2	0.70155	457.2	0.87826	457.2	0.96454	457.2	0.73187	457.2	0.64942	457.2	0.96765	457.2	1
457.4	0.18086	457.4	0.26352	457.4	0.44418	457.4	0.29477	457.4	0.41792	457.4	0.50757	457.4	0.7711	457.4	0.74732	457.4	0.72565	457.4	0.88992	457.4	0.97346	457.4	0.7498	457.4	0.65873	457.4	0.97679	457.4	1
457.6	0.19158	457.6	0.2795	457.6	0.46449	457.6	0.31441	457.6	0.44249	457.6	0.53751	457.6	0.7986	457.6	0.77163	457.6	0.75481	457.6	0.90561	457.6	0.98238	457.6	0.77014	457.6	0.67223	457.6	0.98608	457.6	1
457.8	0.20143	457.8	0.29598	457.8	0.4895	457.8	0.33027	457.8	0.46419	457.8	0.56032	457.8	0.81888	457.8	0.79338	457.8	0.77415	457.8	0.91873	457.8	0.98695	457.8	0.7864	457.8	0.68387	457.8	0.99086	457.8	1
458	0.2165	458	0.31603	458	0.51188	458	0.35294	458	0.49423	458	0.59026	458	0.84156	458	0.81832	458	0.79974	458	0.93251	458	0.99173	458	0.80726	458	0.69737	458	0.99677	458	1
458.2	0.22756	458.2	0.33127	458.2	0.53163	458.2	0.37013	458.2	0.51776	458.2	0.61582	458.2	0.85953	458.2	0.83816	458.2	0.82087	458.2	0.94227	458.2	0.99587	458.2	0.82415	458.2	0.70575	458.2	1	458.2	0.99826
458.4	0.24296	458.4	0.35424	458.4	0.55188	458.4	0.39354	458.4	0.54831	458.4	0.64623	458.4	0.88166	458.4	0.85948	458.4	0.84735	458.4	0.95381	458.4	1	458.4	0.8426	458.4	0.72019	458.4	1	458.4	0.99652
458.6	0.25457	458.6	0.36958	458.6	0.57214	458.6	0.41187	458.6	0.56863	458.6	0.66765	458.6	0.89518	458.6	0.87632	458.6	0.8655	458.6	0.96278	458.6	1	458.6	0.85697	458.6	0.7295	458.6	1	458.6	0.99165
458.8	0.27214	458.8	0.39191	458.8	0.59796	458.8	0.43661	458.8	0.59728	458.8	0.69575	458.8	0.9124	458.8	0.8953	458.8	0.88574	458.8	0.97085	458.8	1	458.8	0.8728	458.8	0.74021	458.8	1	458.8	0.98574
459	0.28541	459	0.41097	459	0.61568	459	0.45512	459	0.62002	459	0.71693	459	0.92333	459	0.90938	459	0.89972	459	0.97702	459	1	459	0.88591	459	0.75045	459	0.99972	459	0.97809
459.2	0.30407	459.2	0.43414	459.2	0.63999	459.2	0.48269	459.2	0.65093	459.2	0.74573	459.2	0.93888	459.2	0.9243	459.2	0.91936	459.2	0.98408	459.2	0.99869	459.2	0.89828	459.2	0.75976	459.2	0.99803	459.2	0.96836
459.4	0.31993	459.4	0.45603	459.4	0.6653	459.4	0.50535	459.4	0.6761	459.4	0.76784	459.4	0.95092	459.4	0.93859	459.4	0.93394	459.4	0.98924	459.4	0.99608	459.4	0.90804	459.4	0.77	459.4	0.99339	459.4	0.9614
459.6	0.34377	459.6	0.48303	459.6	0.68505	459.6	0.53331	459.6	0.7038	459.6	0.79409	459.6	0.96018	459.6	0.95309	459.6	0.94763	459.6	0.99283	459.6	0.98803	459.6	0.9203	459.6	0.78164	459.6	0.9872	459.6	0.95236
459.8	0.36159	459.8	0.50571	459.8	0.71037	459.8	0.55673	459.8	0.72611	459.8	0.81505	459.8	0.96944	459.8	0.96396	459.8	0.96042	459.8	0.99574	459.8	0.9839	459.8	0.93037	459.8	0.79096	459.8	0.98115	459.8	0.94332
460	0.38446	460	0.53598	460	0.73265	460	0.58657	460	0.75475	460	0.84062	460	0.98055	460	0.97399	460	0.96995	460	0.99888	460	0.97607	460	0.94306	460	0.8012	460	0.97328	460	0.93184
460.2	0.40337	460.2	0.55484	460.2	0.74835	460.2	0.60885	460.2	0.77411	460.2	0.8572	460.2	0.98981	460.2	0.98166	460.2	0.97977	460.2	0.99989	460.2	0.97107	460.2	0.95113	460.2	0.81237	460.2	0.96709	460.2	0.92593
460.4	0.42775	460.4	0.58015	460.4	0.76607	460.4	0.63681	460.4	0.80103	460.4	0.8777	460.4	0.99722	460.4	0.98955	460.4	0.98899	460.4	0.99944	460.4	0.96302	460.4	0.95889	460.4	0.82587	460.4	0.95879	460.4	0.91515
460.6	0.44778	460.6	0.60099	460.6	0.78683	460.6	0.65702	460.6	0.82229	460.6	0.8952	460.6	1	460.6	0.99552	460.6	0.99197	460.6	1	460.6	0.9541	460.6	0.96623	460.6	0.83425	460.6	0.94937	460.6	0.9075
460.8	0.477	460.8	0.62928	460.8	0.80759	460.8	0.68761	460.8	0.84565	460.8	0.91455	460.8	1	460.8	0.99808	460.8	0.99851	460.8	0.99821	460.8	0.94126	460.8	0.97274	460.8	0.84496	460.8	0.93657	460.8	0.89742
461	0.49912	461	0.65509	461	0.82987	461	0.71047	461	0.86518	461	0.92998	461	1	461	1	461	0.9997	461	0.9963	461	0.93386	461	0.97903	461	0.85288	461	0.9294	461	0.88385
461.2	0.5321	461.2	0.68784	461.2	0.84202	461.2	0.74106	461.2	0.88888	461.2	0.94518	461.2	1	461.2	1	461.2	1	461.2	0.9917	461.2	0.91951	461.2	0.98752	461.2	0.86545	461.2	0.91506	461.2	0.86821
461.4	0.55631	461.4	0.71216	461.4	0.8643	461.4	0.76392	461.4	0.90885	461.4	0.95831	461.4	1	461.4	1	461.4	1	461.4	0.98901	461.4	0.90841	461.4	0.99297	461.4	0.87569	461.4	0.9031	461.4	0.85638
461.6	0.59137	461.6	0.74392	461.6	0.87797	461.6	0.79206	461.6	0.92708	461.6	0.9696	461.6	0.99722	461.6	1	461.6	1	461.6	0.98318	461.6	0.89318	461.6	0.99643	461.6	0.88966	461.6	0.88777	461.6	0.84317
461.8	0.61766	461.8	0.76824	461.8	0.89974	461.8	0.81302	461.8	0.94097	461.8	0.97697	461.8	0.98981	461.8	0.99872	461.8	0.9997	461.8	0.9778	461.8	0.87904	461.8	0.99832	461.8	0.90176	461.8	0.87582	461.8	0.83065
462	0.65105	462	0.79553	462	0.90683	462	0.83852	462	0.95746	462	0.98687	462	0.98426	462	0.99296	462	0.99494	462	0.96984	462	0.86164	462	1	462	0.9134	462	0.86175	462	0.81535
462.2	0.67443	462.2	0.81836	462.2	0.92304	462.2	0.85797	462.2	0.96701	462.2	0.99309	462.2	0.98055	462.2	0.98742	462.2	0.98959	462.2	0.96413	462.2	0.84967	462.2	1	462.2	0.92132	462.2	0.8505	462.2	0.8077
462.4	0.70782	462.4	0.84615	462.4	0.93974	462.4	0.87894	462.4	0.97656	462.4	1	462.4	0.97222	462.4	0.98038	462.4	0.98125	462.4	0.9546	462.4	0.8327	462.4	1	462.4	0.93389	462.4	0.83546	462.4	0.79344
462.6	0.73746	462.6	0.86898	462.6	0.95342	462.6	0.89877	462.6	0.98524	462.6	1	462.6	0.96203	462.6	0.97505	462.6	0.9759	462.6	0.94642	462.6	0.82182	462.6	1	462.6	0.9446	462.6	0.82153	462.6	0.78058
462.8	0.76876	462.8	0.88983	462.8	0.95494	462.8	0.91765	462.8	0.99479	462.8	1	462.8	0.95092	462.8	0.96396	462.8	0.96251	462.8	0.93554	462.8	0.80377	462.8	0.99864	462.8	0.95717	462.8	0.80466	462.8	0.76493
463	0.79589	463	0.90868	463	0.97063	463	0.93503	463	1	463	1	463	0.94166	463	0.95821	463	0.9518	463	0.92691	463	0.79028	463	0.9957	463	0.95996	463	0.79087	463	0.75137
463.2	0.82678	463.2	0.92754	463.2	0.97164	463.2	0.95014	463.2	1	463.2	0.99724	463.2	0.92777	463.2	0.94328	463.2	0.94049	463.2	0.91323	463.2	0.77374	463.2	0.99297	463.2	0.96834	463.2	0.7754	463.2	0.73815
463.4	0.85057	463.4	0.94342	463.4	0.98582	463.4	0.9609	463.4	1	463.4	0.99148	463.4	0.9162	463.4	0.93518	463.4	0.93186	463.4	0.90348	463.4	0.76243	463.4	0.99046	463.4	0.97858	463.4	0.76387	463.4	0.72598
463.6	0.87645	463.6	0.95831	463.6	0.98835	463.6	0.97356	463.6	1	463.6	0.98848	463.6	0.9049	463.6	0.92196	463.6	0.91698	463.6	0.89182	463.6	0.74655	463.6	0.98438	463.6	0.98743	463.6	0.74939	463.6	0.71311
463.8	0.89398	463.8	0.97022	463.8	0.99646	463.8	0.98376	463.8	0.99479	463.8	0.98388	463.8	0.89592	463.8	0.91279	463.8	0.90716	463.8	0.88285	463.8	0.7348	463.8	0.98123	463.8	0.99115	463.8	0.73743	463.8	0.70303
464	0.91736	464	0.98114	464	0.99747	464	0.99075	464	0.99219	464	0.97443	464	0.87814	464	0.89957	464	0.89437	464	0.86974	464	0.71827	464	0.97326	464	0.99395	464	0.7207	464	0.68947
464.2	0.9353	464.2	0.99057	464.2	1	464.2	0.99679	464.2	0.98611	464.2	0.96937	464.2	0.86481	464.2	0.88656	464.2	0.88008	464.2	0.85886	464.2	0.70608	464.2	0.96812	464.2	0.99907	464.2	0.7093	464.2	0.67625
464.4	0.952	464.4	0.99553	464.4	0.99899	464.4	1	464.4	0.9783	464.4	0.95624	464.4	0.85138	464.4	0.87035	464.4	0.86342	464.4	0.84485	464.4	0.69042	464.4	0.95994	464.4	0.99907	464.4	0.69299	464.4	0.66269
464.6	0.96536	464.6	1	464.6	0.99646	464.6	1	464.6	0.97135	464.6	0.94587	464.6	0.83499	464.6	0.85735	464.6	0.85092	464.6	0.83241	464.6	0.67693	464.6	0.95355	464.6	1	464.6	0.67977	464.6	0.65122
464.8	0.97788	464.8	1	464.8	0.99443	464.8	1	464.8	0.95659	464.8	0.93229	464.8	0.81638	464.8	0.8405	464.8	0.83277	464.8	0.81739	464.8	0.66214	464.8	0.94348	464.8	1	464.8	0.66641	464.8	0.64078
465	0.98957	465	1	465	0.99342	465	1	465	0.94878	465	0.92284	465	0.80351	465	0.82899	465	0.82027	465	0.80674	465	0.6517	465	0.93488	465	0.99907	465	0.65389	465	0.63035
465.2	0.9975	465.2	1	465.2	0.98835	465.2	0.99773	465.2	0.93663	465.2	0.90902	465.2	0.78702	465.2	0.81449	465.2	0.80242	465.2	0.79295	465.2	0.63625	465.2	0.92324	465.2	0.99907	465.2	0.63884	465.2	0.61679
465.4	1	465.4	0.99454	465.4	0.98633	465.4	0.99471	465.4	0.92534	465.4	0.89774	465.4	0.77341	465.4	0.80233	465.4	0.79081	465.4	0.78207	465.4	0.62668	465.4	0.9138	465.4	0.99674	465.4	0.629	465.4	0.60601
465.6	1	465.6	0.98908	465.6	0.98278	465.6	0.98716	465.6	0.91232	465.6	0.88185	465.6	0.7586	465.6	0.78399	465.6	0.77445	465.6	0.76694	465.6	0.61101	465.6	0.90153	465.6	0.98929	465.6	0.61592	465.6	0.59245
465.8	1	465.8	0.98313	465.8	0.97924	465.8	0.98074	465.8	0.90103	465.8	0.86872	465.8	0.74165	465.8	0.77312	465.8	0.75898	465.8	0.7545	465.8	0.5997	465.8	0.8922	465.8	0.98184	465.8	0.60355	465.8	0.58445
466	1	466	0.9732	466	0.96658	466	0.97186	466	0.8828	466	0.85121	466	0.726	466	0.75542	466	0.73904	466	0.73948	466	0.58404	466	0.87574	466	0.97253	466	0.58751	466	0.57263
466.2	0.9929	466.2	0.96228	466.2	0.95595	466.2	0.95939	466.2	0.86978	466.2	0.83601	466.2	0.71193	466.2	0.74177	466.2	0.72476	466.2	0.72681	466.2	0.57294	466.2	0.86525	466.2	0.96694	466.2	0.57668	466.2	0.56428
466.4	0.9833	466.4	0.94739	466.4	0.94683	466.4	0.94787	466.4	0.85068	466.4	0.81828	466.4	0.69683	466.4	0.72386	466.4	0.7072	466.4	0.71167	466.4	0.55902	466.4	0.85057	466.4	0.95298	466.4	0.56487	466.4	0.55385
466.6	0.97788	466.6	0.93747	466.6	0.93519	466.6	0.93654	466.6	0.8361	466.6	0.80423	466.6	0.68165	466.6	0.71064	466.6	0.69381	466.6	0.70114	466.6	0.54836	466.6	0.83788	466.6	0.94553	466.6	0.55545	466.6	0.54481
466.8	0.96661	466.8	0.92159	466.8	0.92405	466.8	0.92068	466.8	0.81926	466.8	0.78626	466.8	0.66266	466.8	0.69593	466.8	0.68042	466.8	0.68735	466.8	0.53639	466.8	0.82268	466.8	0.93435	466.8	0.54363	466.8	0.53333
467	0.95492	467	0.90918	467	0.91595	467	0.91085	467	0.8071	467	0.77221	467	0.65072	467	0.68676	467	0.66673	467	0.67625	467	0.52791	467	0.81198	467	0.92411	467	0.53379	467	0.52672
467.2	0.93948	467.2	0.8933	467.2	0.90683	467.2	0.89442	467.2	0.78783	467.2	0.7524	467.2	0.63544	467.2	0.67013	467.2	0.65066	467.2	0.66235	467.2	0.51616	467.2	0.79499	467.2	0.91294	467.2	0.52338	467.2	0.51421
467.4	0.92737	467.4	0.87742	467.4	0.89114	467.4	0.87988	467.4	0.77142	467.4	0.73789	467.4	0.62155	467.4	0.6584	467.4	0.63638	467.4	0.65181	467.4	0.50681	467.4	0.78105	467.4	0.8999	467.4	0.51354	467.4	0.50621
467.6	0.90692	467.6	0.85757	467.6	0.88	467.6	0.8608	467.6	0.75128	467.6	0.71809	467.6	0.60822	467.6	0.64219	467.6	0.61912	467.6	0.63758	467.6	0.49615	467.6	0.76322	467.6	0.88314	467.6	0.50116	467.6	0.49717
467.8	0.89148	467.8	0.84367	467.8	0.86379	467.8	0.84286	467.8	0.73357	467.8	0.70381	467.8	0.59497	467.8	0.62961	467.8	0.60662	467.8	0.6258	467.8	0.48657	467.8	0.75137	467.8	0.86964	467.8	0.4916	467.8	0.48882
468	0.86727	468	0.82233	468	0.84961	468	0.82284	468	0.71239	468	0.68492	468	0.58007	468	0.61618	468	0.59264	468	0.61258	468	0.47722	468	0.73659	468	0.85195	468	0.48133	468	0.48013
468.2	0.85308	468.2	0.80695	468.2	0.83848	468.2	0.80887	468.2	0.69867	468.2	0.67294	468.2	0.57053	468.2	0.60403	468.2	0.58222	468.2	0.60294	468.2	0.46939	468.2	0.72379	468.2	0.84077	468.2	0.4736	468.2	0.47248
468.4	0.83179	468.4	0.7861	468.4	0.82582	468.4	0.79017	468.4	0.68383	468.4	0.65567	468.4	0.56034	468.4	0.59038	468.4	0.56854	468.4	0.59094	468.4	0.45938	468.4	0.71016	468.4	0.82727	468.4	0.4653	468.4	0.46552
468.6	0.81551	468.6	0.7732	468.6	0.81518	468.6	0.77676	468.6	0.66968	468.6	0.64346	468.6	0.54914	468.6	0.57993	468.6	0.55812	468.6	0.58164	468.6	0.45242	468.6	0.69789	468.6	0.8133	468.6	0.45855	468.6	0.45961
468.8	0.79464	468.8	0.75285	468.8	0.79797	468.8	0.75693	468.8	0.65258	468.8	0.62872	468.8	0.53451	468.8	0.56778	468.8	0.54533	468.8	0.57076	468.8	0.44263	468.8	0.68195	468.8	0.79794	468.8	0.45095	468.8	0.45092
469	0.7792	469	0.73797	469	0.78632	469	0.74295	469	0.63955	469	0.6149	469	0.52525	469	0.55839	469	0.53372	469	0.56191	469	0.43719	469	0.66906	469	0.78397	469	0.44406	469	0.44501
469.2	0.75791	469.2	0.71464	469.2	0.76607	469.2	0.72331	469.2	0.62098	469.2	0.59993	469.2	0.51386	469.2	0.54517	469.2	0.51974	469.2	0.55025	469.2	0.42892	469.2	0.65417	469.2	0.76721	469.2	0.43492	469.2	0.43562
469.4	0.74121	469.4	0.70025	469.4	0.75088	469.4	0.70688	469.4	0.60465	469.4	0.58611	469.4	0.50525	469.4	0.5343	469.4	0.50992	469.4	0.54061	469.4	0.42152	469.4	0.64221	469.4	0.75324	469.4	0.42831	469.4	0.42797
469.6	0.72243	469.6	0.6794	469.6	0.73822	469.6	0.68818	469.6	0.58729	469.6	0.56999	469.6	0.49237	469.6	0.52214	469.6	0.49831	469.6	0.52985	469.6	0.41413	469.6	0.62816	469.6	0.73555	469.6	0.42015	469.6	0.4224
469.8	0.70532	469.8	0.6665	469.8	0.72759	469.8	0.67515	469.8	0.57488	469.8	0.55755	469.8	0.4833	469.8	0.51383	469.8	0.48909	469.8	0.52166	469.8	0.40782	469.8	0.61694	469.8	0.72205	469.8	0.41481	469.8	0.4151
470	0.68403	470	0.64814	470	0.7124	470	0.65739	470	0.55934	470	0.54373	470	0.47256	470	0.50253	470	0.47986	470	0.51146	470	0.40042	470	0.60509	470	0.70855	470	0.40904	470	0.40884
470.2	0.66942	470.2	0.63424	470.2	0.69569	470.2	0.64531	470.2	0.54797	470.2	0.53429	470.2	0.46802	470.2	0.494	470.2	0.47064	470.2	0.50417	470.2	0.39629	470.2	0.5945	470.2	0.69318	470.2	0.40258	470.2	0.40432
470.4	0.65022	470.4	0.61538	470.4	0.68556	470.4	0.62831	470.4	0.53364	470.4	0.52208	470.4	0.45784	470.4	0.48397	470.4	0.45933	470.4	0.49498	470.4	0.38824	470.4	0.58254	470.4	0.67829	470.4	0.39526	470.4	0.40015
470.6	0.63519	470.6	0.60347	470.6	0.66885	470.6	0.61376	470.6	0.52427	470.6	0.51149	470.6	0.44922	470.6	0.4763	470.6	0.45308	470.6	0.48747	470.6	0.38345	470.6	0.57153	470.6	0.66944	470.6	0.39034	470.6	0.39563
470.8	0.61558	470.8	0.5871	470.8	0.65771	470.8	0.59733	470.8	0.51116	470.8	0.49767	470.8	0.44237	470.8	0.46606	470.8	0.44267	470.8	0.47761	470.8	0.37736	470.8	0.55937	470.8	0.65361	470.8	0.38345	470.8	0.39006
471	0.60013	471	0.57419	471	0.63796	471	0.58506	471	0.49996	471	0.488	471	0.43432	471	0.45668	471	0.43582	471	0.47043	471	0.37301	471	0.54951	471	0.64011	471	0.37923	471	0.38624
471.2	0.5826	471.2	0.55831	471.2	0.63037	471.2	0.56881	471.2	0.48659	471.2	0.47579	471.2	0.42293	471.2	0.44709	471.2	0.42601	471.2	0.46146	471.2	0.36583	471.2	0.5364	471.2	0.62428	471.2	0.3729	471.2	0.37998
471.4	0.56799	471.4	0.54938	471.4	0.6167	471.4	0.55786	471.4	0.47522	471.4	0.46796	471.4	0.41672	471.4	0.4409	471.4	0.41738	471.4	0.4544	471.4	0.36213	471.4	0.52781	471.4	0.61404	471.4	0.36896	471.4	0.3765
471.6	0.55213	471.6	0.5335	471.6	0.60556	471.6	0.54388	471.6	0.46489	471.6	0.45759	471.6	0.40774	471.6	0.43237	471.6	0.41113	471.6	0.44577	471.6	0.35735	471.6	0.5169	471.6	0.601	471.6	0.36306	471.6	0.37337
471.8	0.53919	471.8	0.52159	471.8	0.5934	471.8	0.53217	471.8	0.4569	471.8	0.44907	471.8	0.40246	471.8	0.4264	471.8	0.40547	471.8	0.43949	471.8	0.35256	471.8	0.50977	471.8	0.59029	471.8	0.35884	471.8	0.37024
472	0.52542	472	0.50819	472	0.58176	472	0.51895	472	0.44535	472	0.4394	472	0.39468	472	0.41809	472	0.39684	472	0.43164	472	0.34625	472	0.4997	472	0.57632	472	0.35406	472	0.36329
472.2	0.51248	472.2	0.49677	472.2	0.56859	472.2	0.50875	472.2	0.43902	472.2	0.43041	472.2	0.38839	472.2	0.41297	472.2	0.39149	472.2	0.42525	472.2	0.34299	472.2	0.49121	472.2	0.56655	472.2	0.3497	472.2	0.36016
472.4	0.49829	472.4	0.48238	472.4	0.55745	472.4	0.49497	472.4	0.42869	472.4	0.4212	472.4	0.37996	472.4	0.40337	472.4	0.38316	472.4	0.41786	472.4	0.33733	472.4	0.48177	472.4	0.55351	472.4	0.34407	472.4	0.35459
472.6	0.48535	472.6	0.47151	472.6	0.5453	472.6	0.48382	472.6	0.42018	472.6	0.41498	472.6	0.37653	472.6	0.39612	472.6	0.3778	472.6	0.41214	472.6	0.33276	472.6	0.47359	472.6	0.5456	472.6	0.33915	472.6	0.35112
472.8	0.47199	472.8	0.4596	472.8	0.53619	472.8	0.47211	472.8	0.41045	472.8	0.40508	472.8	0.36848	472.8	0.38909	472.8	0.37006	472.8	0.40474	472.8	0.32819	472.8	0.46321	472.8	0.53349	472.8	0.3338	472.8	0.34743
473	0.46364	473	0.45082	473	0.52555	473	0.46248	473	0.39995	473	0.39886	473	0.36496	473	0.38354	473	0.36501	473	0.39891	473	0.32428	473	0.45608	473	0.52464	473	0.33015	473	0.34458
473.2	0.44987	473.2	0.43831	473.2	0.51441	473.2	0.45153	473.2	0.39275	473.2	0.39103	473.2	0.35681	473.2	0.37693	473.2	0.35965	473.2	0.39263	473.2	0.32014	473.2	0.44811	473.2	0.51487	473.2	0.32635	473.2	0.34034
473.4	0.44194	473.4	0.42878	473.4	0.50596	473.4	0.44435	473.4	0.38788	473.4	0.38573	473.4	0.35088	473.4	0.37245	473.4	0.35667	473.4	0.38804	473.4	0.31579	473.4	0.4415	473.4	0.50602	473.4	0.32213	473.4	0.33804
473.6	0.43025	473.6	0.41752	473.6	0.4974	473.6	0.43434	473.6	0.37877	473.6	0.37813	473.6	0.34524	473.6	0.36542	473.6	0.34923	473.6	0.38187	473.6	0.31231	473.6	0.43312	473.6	0.49718	473.6	0.31763	473.6	0.3338
473.8	0.42149	473.8	0.41042	473.8	0.48586	473.8	0.42697	473.8	0.3713	473.8	0.37214	473.8	0.34116	473.8	0.36264	473.8	0.34537	473.8	0.37705	473.8	0.3097	473.8	0.42714	473.8	0.48926	473.8	0.31496	473.8	0.33011
474	0.40984	474	0.40223	474	0.47735	474	0.4164	474	0.36141	474	0.36454	474	0.33718	474	0.35667	474	0.33823	474	0.37145	474	0.30557	474	0.41948	474	0.48181	474	0.31102	474	0.32688
474.2	0.40003	474.2	0.39439	474.2	0.46666	474.2	0.40903	474.2	0.35828	474.2	0.35902	474.2	0.33283	474.2	0.3522	474.2	0.33376	474.2	0.36685	474.2	0.30231	474.2	0.41351	474.2	0.47343	474.2	0.30793	474.2	0.32434
474.4	0.39031	474.4	0.38576	474.4	0.45968	474.4	0.40034	474.4	0.35368	474.4	0.35257	474.4	0.32866	474.4	0.34687	474.4	0.32841	474.4	0.36136	474.4	0.29861	474.4	0.40585	474.4	0.465	474.4	0.30469	474.4	0.32194
474.6	0.38446	474.6	0.37975	474.6	0.45198	474.6	0.39392	474.6	0.34743	474.6	0.34681	474.6	0.32236	474.6	0.34303	474.6	0.32513	474.6	0.35766	474.6	0.29621	474.6	0.40103	474.6	0.45816	474.6	0.3023	474.6	0.31992
474.8	0.37499	474.8	0.37171	474.8	0.44692	474.8	0.38693	474.8	0.34031	474.8	0.34128	474.8	0.31829	474.8	0.33642	474.8	0.31948	474.8	0.35306	474.8	0.29208	474.8	0.39495	474.8	0.4509	474.8	0.29808	474.8	0.31686
475	0.36893	475	0.36486	475	0.43735	475	0.38032	475	0.33475	475	0.33806	475	0.31421	475	0.33258	475	0.31561	475	0.34947	475	0.28925	475	0.3897	475	0.44475	475	0.29485	475	0.31544
475.2	0.35975	475.2	0.35861	475.2	0.42955	475.2	0.37334	475.2	0.32937	475.2	0.33322	475.2	0.31005	475.2	0.32959	475.2	0.31115	475.2	0.34477	475.2	0.28708	475.2	0.38394	475.2	0.43823	475.2	0.29246	475.2	0.31314
475.4	0.35424	475.4	0.35365	475.4	0.42094	475.4	0.36748	475.4	0.32547	475.4	0.32769	475.4	0.30366	475.4	0.32533	475.4	0.30758	475.4	0.3414	475.4	0.28447	475.4	0.37943	475.4	0.43185	475.4	0.28964	475.4	0.31119
475.6	0.34761	475.6	0.34774	475.6	0.41714	475.6	0.3603	475.6	0.3193	475.6	0.32101	475.6	0.30097	475.6	0.32064	475.6	0.30252	475.6	0.33714	475.6	0.28164	475.6	0.37355	475.6	0.42529	475.6	0.28627	475.6	0.30824
475.8	0.34289	475.8	0.34199	475.8	0.40681	475.8	0.35577	475.8	0.31461	475.8	0.31664	475.8	0.29829	475.8	0.31659	475.8	0.29954	475.8	0.33378	475.8	0.27903	475.8	0.36936	475.8	0.41952	475.8	0.28416	475.8	0.30779
476	0.33688	476	0.33742	476	0.40469	476	0.34973	476	0.30828	476	0.31203	476	0.29597	476	0.31232	476	0.29529	476	0.32963	476	0.27663	476	0.36527	476	0.41454	476	0.28163	476	0.30594
476.2	0.332	476.2	0.33216	476.2	0.3933	476.2	0.34538	476.2	0.30446	476.2	0.30788	476.2	0.29218	476.2	0.3087	476.2	0.29303	476.2	0.32649	476.2	0.27555	476.2	0.36212	476.2	0.41002	476.2	0.28008	476.2	0.30438
476.4	0.32619	476.4	0.32526	476.4	0.3897	476.4	0.33991	476.4	0.3002	476.4	0.30397	476.4	0.2894	476.4	0.30486	476.4	0.28862	476.4	0.32313	476.4	0.27337	476.4	0.35699	476.4	0.40476	476.4	0.27839	476.4	0.30361
476.6	0.32181	476.6	0.32	476.6	0.38236	476.6	0.33518	476.6	0.2969	476.6	0.29982	476.6	0.28838	476.6	0.30102	476.6	0.28529	476.6	0.32044	476.6	0.27141	476.6	0.35384	476.6	0.40182	476.6	0.27685	476.6	0.30177
476.8	0.31655	476.8	0.31578	476.8	0.37613	476.8	0.33103	476.8	0.29413	476.8	0.29706	476.8	0.28458	476.8	0.29676	476.8	0.28151	476.8	0.31708	476.8	0.26989	476.8	0.34986	476.8	0.39605	476.8	0.27558	476.8	0.30153
477	0.3125	477	0.31216	477	0.37152	477	0.32744	477	0.28909	477	0.2936	477	0.28125	477	0.29441	477	0.27764	477	0.31439	477	0.26858	477	0.34598	477	0.39312	477	0.27389	477	0.30128
477.2	0.30699	477.2	0.30675	477.2	0.36874	477.2	0.32102	477.2	0.28353	477.2	0.28854	477.2	0.27634	477.2	0.29036	477.2	0.27333	477.2	0.31125	477.2	0.26597	477.2	0.3421	477.2	0.38581	477.2	0.27235	477.2	0.30087
477.4	0.30186	477.4	0.30223	477.4	0.36109	477.4	0.31573	477.4	0.28223	477.4	0.28531	477.4	0.27125	477.4	0.28737	477.4	0.27178	477.4	0.30878	477.4	0.26597	477.4	0.33864	477.4	0.3839	477.4	0.2708	477.4	0.30069
477.6	0.29681	477.6	0.29871	477.6	0.35689	477.6	0.31195	477.6	0.27893	477.6	0.28255	477.6	0.26866	477.6	0.28481	477.6	0.26907	477.6	0.30609	477.6	0.26423	477.6	0.33476	477.6	0.38041	477.6	0.26953	477.6	0.30066
477.8	0.29372	477.8	0.29608	477.8	0.3496	477.8	0.30855	477.8	0.27399	477.8	0.27794	477.8	0.26699	477.8	0.28204	477.8	0.26663	477.8	0.30441	477.8	0.26271	477.8	0.33213	477.8	0.37748	477.8	0.26855	477.8	0.30052
478	0.28975	478	0.29132	478	0.34676	478	0.30289	478	0.26921	478	0.27518	478	0.26375	478	0.2797	478	0.26416	478	0.30194	478	0.26162	478	0.32878	478	0.37305	478	0.26616	478	0.29923
478.2	0.28704	478.2	0.28774	478.2	0.33962	478.2	0.29968	478.2	0.26487	478.2	0.27288	478.2	0.26273	478.2	0.27735	478.2	0.26098	478.2	0.30015	478.2	0.26053	478.2	0.32616	478.2	0.36979	478.2	0.26588	478.2	0.29864
478.4	0.2822	478.4	0.28347	478.4	0.33881	478.4	0.29552	478.4	0.26339	478.4	0.26965	478.4	0.25866	478.4	0.27479	478.4	0.25884	478.4	0.29836	478.4	0.26032	478.4	0.3227	478.4	0.36691	478.4	0.26559	478.4	0.29697
478.6	0.27932	478.6	0.2806	478.6	0.32995	478.6	0.29307	478.6	0.26062	478.6	0.26666	478.6	0.25616	478.6	0.2733	478.6	0.25666	478.6	0.29667	478.6	0.25966	478.6	0.3206	478.6	0.36374	478.6	0.26503	478.6	0.29697
478.8	0.27448	478.8	0.27682	478.8	0.32863	478.8	0.28929	478.8	0.2574	478.8	0.26251	478.8	0.2543	478.8	0.27031	478.8	0.25512	478.8	0.29466	478.8	0.25879	478.8	0.31714	478.8	0.35978	478.8	0.26475	478.8	0.29697
479	0.27176	479	0.27489	479	0.32301	479	0.28608	479	0.25437	479	0.26021	479	0.25143	479	0.26797	479	0.25244	479	0.29286	479	0.25858	479	0.31515	479	0.35676	479	0.26391	479	0.29697
479.2	0.26751	479.2	0.27012	479.2	0.32018	479.2	0.28192	479.2	0.25133	479.2	0.25675	479.2	0.25088	479.2	0.26498	479.2	0.25092	479.2	0.2914	479.2	0.25858	479.2	0.31284	479.2	0.35429	479.2	0.26377	479.2	0.29777
479.4	0.26542	479.4	0.26705	479.4	0.31542	479.4	0.27871	479.4	0.24829	479.4	0.25399	479.4	0.25014	479.4	0.26392	479.4	0.2483	479.4	0.29062	479.4	0.25858	479.4	0.31085	479.4	0.35191	479.4	0.26377	479.4	0.29948
479.6	0.26145	479.6	0.26298	479.6	0.314	479.6	0.27494	479.6	0.24568	479.6	0.25053	479.6	0.25004	479.6	0.26157	479.6	0.24693	479.6	0.28916	479.6	0.25858	479.6	0.30885	479.6	0.34847	479.6	0.26377	479.6	0.29958
479.8	0.25887	479.8	0.26025	479.8	0.31036	479.8	0.2721	479.8	0.24334	479.8	0.24823	479.8	0.24903	479.8	0.25987	479.8	0.24512	479.8	0.28849	479.8	0.25858	479.8	0.30697	479.8	0.34619	479.8	0.26391	479.8	0.29982
480	0.25499	480	0.25762	480	0.30858	480	0.2687	480	0.24108	480	0.24616	480	0.24819	480	0.25901	480	0.2436	480	0.28771	480	0.25858	480	0.30518	480	0.34316	480	0.26405	480	0.30062
480.2	0.25319	480.2	0.25459	480.2	0.30509	480.2	0.26625	480.2	0.239	480.2	0.24455	480.2	0.24523	480.2	0.25837	480.2	0.24274	480.2	0.28703	480.2	0.25879	480.2	0.3034	480.2	0.34097	480.2	0.26419	480.2	0.30062
480.4	0.25144	480.4	0.24913	480.4	0.30119	480.4	0.26285	480.4	0.23605	480.4	0.24178	480.4	0.24514	480.4	0.25667	480.4	0.2417	480.4	0.28591	480.4	0.25879	480.4	0.30141	480.4	0.3379	480.4	0.26489	480.4	0.30069
480.6	0.24948	480.6	0.24581	480.6	0.29694	480.6	0.25945	480.6	0.23379	480.6	0.24063	480.6	0.24384	480.6	0.25475	480.6	0.23982	480.6	0.28502	480.6	0.25879	480.6	0.29942	480.6	0.33501	480.6	0.26531	480.6	0.30069
480.8	0.24584	480.8	0.24318	480.8	0.2939	480.8	0.25624	480.8	0.23101	480.8	0.23741	480.8	0.24245	480.8	0.25368	480.8	0.23857	480.8	0.28468	480.8	0.25879	480.8	0.29753	480.8	0.33436	480.8	0.26574	480.8	0.30149
481	0.24238	481	0.24139	481	0.29177	481	0.25416	481	0.23006	481	0.23602	481	0.24171	481	0.25304	481	0.23827	481	0.28445	481	0.25879	481	0.29617	481	0.33236	481	0.26616	481	0.30268
481.2	0.23933	481.2	0.2395	481.2	0.28939	481.2	0.25133	481.2	0.22728	481.2	0.23372	481.2	0.24115	481.2	0.25198	481.2	0.23729	481.2	0.28412	481.2	0.25966	481.2	0.29522	481.2	0.32794	481.2	0.26728	481.2	0.30271
481.4	0.23687	481.4	0.23529	481.4	0.28686	481.4	0.24887	481.4	0.22407	481.4	0.23234	481.4	0.24115	481.4	0.25198	481.4	0.23631	481.4	0.28412	481.4	0.26097	481.4	0.29449	481.4	0.32538	481.4	0.26827	481.4	0.30351
481.6	0.23412	481.6	0.2337	481.6	0.28397	481.6	0.24528	481.6	0.22138	481.6	0.23096	481.6	0.24115	481.6	0.25176	481.6	0.23557	481.6	0.28434	481.6	0.26162	481.6	0.29344	481.6	0.32412	481.6	0.26911	481.6	0.30358
481.8	0.23174	481.8	0.23231	481.8	0.27775	481.8	0.24264	481.8	0.21964	481.8	0.23017	481.8	0.24171	481.8	0.25155	481.8	0.23539	481.8	0.28412	481.8	0.26184	481.8	0.2925	481.8	0.32142	481.8	0.26939	481.8	0.30441
482	0.22844	482	0.22873	482	0.2738	482	0.24018	482	0.2166	482	0.22916	482	0.24171	482	0.25112	482	0.23476	482	0.28401	482	0.26423	482	0.29176	482	0.31872	482	0.26967	482	0.30448
482.2	0.22656	482.2	0.22561	482.2	0.27678	482.2	0.23773	482.2	0.21608	482.2	0.22741	482.2	0.24199	482.2	0.25112	482.2	0.23476	482.2	0.28389	482.2	0.2651	482.2	0.2905	482.2	0.31709	482.2	0.26981	482.2	0.30525
482.4	0.22251	482.4	0.22139	482.4	0.27309	482.4	0.23546	482.4	0.21469	482.4	0.22621	482.4	0.24217	482.4	0.25112	482.4	0.23461	482.4	0.28412	482.4	0.26576	482.4	0.28914	482.4	0.31621	482.4	0.2708	482.4	0.30577
482.6	0.22038	482.6	0.21896	482.6	0.27243	482.6	0.2332	482.6	0.21261	482.6	0.22582	482.6	0.24217	482.6	0.25112	482.6	0.23461	482.6	0.28412	482.6	0.26663	482.6	0.28862	482.6	0.31425	482.6	0.27122	482.6	0.30657
482.8	0.217	482.8	0.21737	482.8	0.26833	482.8	0.23074	482.8	0.21113	482.8	0.22547	482.8	0.24245	482.8	0.25112	482.8	0.23461	482.8	0.28445	482.8	0.26663	482.8	0.28862	482.8	0.3142	482.8	0.27291	482.8	0.30723
483	0.21421	483	0.21568	483	0.26625	483	0.22942	483	0.21096	483	0.22488	483	0.24245	483	0.25176	483	0.23485	483	0.28468	483	0.26684	483	0.28799	483	0.3136	483	0.27431	483	0.30932
483.2	0.21266	483.2	0.21484	483.2	0.26489	483.2	0.22677	483.2	0.21079	483.2	0.22398	483.2	0.24245	483.2	0.25198	483.2	0.23506	483.2	0.28535	483.2	0.26706	483.2	0.28715	483.2	0.31239	483.2	0.27614	483.2	0.31022
483.4	0.20953	483.4	0.2128	483.4	0.26433	483.4	0.22583	483.4	0.2094	483.4	0.22326	483.4	0.24245	483.4	0.2524	483.4	0.23607	483.4	0.28569	483.4	0.26837	483.4	0.28715	483.4	0.31043	483.4	0.27685	483.4	0.31029
483.6	0.20774	483.6	0.21057	483.6	0.26463	483.6	0.22413	483.6	0.2074	483.6	0.22294	483.6	0.24319	483.6	0.25304	483.6	0.23691	483.6	0.28647	483.6	0.26967	483.6	0.28694	483.6	0.31006	483.6	0.27825	483.6	0.31029
483.8	0.20456	483.8	0.20789	483.8	0.26347	483.8	0.22205	483.8	0.20671	483.8	0.22292	483.8	0.24356	483.8	0.25304	483.8	0.23708	483.8	0.28692	483.8	0.27119	483.8	0.28673	483.8	0.30848	483.8	0.27938	483.8	0.31102
484	0.20269	484	0.2068	484	0.25957	484	0.21998	484	0.20584	484	0.22292	484	0.24403	484	0.25304	484	0.23801	484	0.28771	484	0.27141	484	0.28673	484	0.30661	484	0.28092	484	0.31102
484.2	0.20181	484.2	0.2066	484.2	0.26043	484.2	0.2196	484.2	0.20558	484.2	0.22292	484.2	0.24421	484.2	0.25347	484.2	0.23804	484.2	0.28804	484.2	0.27272	484.2	0.28662	484.2	0.30484	484.2	0.28149	484.2	0.31078
484.4	0.20039	484.4	0.20342	484.4	0.25921	484.4	0.21884	484.4	0.20558	484.4	0.22292	484.4	0.24477	484.4	0.25454	484.4	0.23881	484.4	0.2886	484.4	0.27381	484.4	0.28641	484.4	0.3048	484.4	0.28205	484.4	0.31078
484.6	0.1991	484.6	0.20273	484.6	0.25582	484.6	0.21771	484.6	0.20514	484.6	0.22292	484.6	0.24754	484.6	0.25518	484.6	0.23908	484.6	0.28894	484.6	0.27381	484.6	0.28641	484.6	0.30466	484.6	0.28346	484.6	0.31046
484.8	0.19768	484.8	0.20184	484.8	0.25511	484.8	0.21639	484.8	0.20497	484.8	0.22329	484.8	0.25041	484.8	0.25539	484.8	0.24003	484.8	0.28961	484.8	0.27533	484.8	0.28673	484.8	0.30289	484.8	0.28458	484.8	0.31078
485	0.19567	485	0.20005	485	0.25527	485	0.21563	485	0.20471	485	0.2234	485	0.25088	485	0.25667	485	0.24158	485	0.28961	485	0.27533	485	0.28673	485	0.30191	485	0.28557	485	0.31099
485.2	0.19559	485.2	0.1996	485.2	0.25851	485.2	0.21544	485.2	0.20471	485.2	0.22474	485.2	0.25217	485.2	0.2588	485.2	0.24199	485.2	0.29028	485.2	0.27576	485.2	0.28673	485.2	0.30047	485.2	0.28669	485.2	0.31078
485.4	0.19492	485.4	0.19806	485.4	0.25486	485.4	0.21544	485.4	0.20445	485.4	0.22476	485.4	0.25273	485.4	0.25923	485.4	0.24277	485.4	0.29107	485.4	0.27685	485.4	0.28673	485.4	0.29972	485.4	0.28711	485.4	0.31085
485.6	0.19334	485.6	0.19787	485.6	0.25476	485.6	0.21544	485.6	0.20471	485.6	0.22695	485.6	0.25375	485.6	0.26093	485.6	0.24298	485.6	0.2914	485.6	0.27816	485.6	0.28683	485.6	0.29921	485.6	0.28767	485.6	0.31085
485.8	0.19116	485.8	0.19787	485.8	0.25542	485.8	0.21488	485.8	0.20471	485.8	0.22736	485.8	0.25375	485.8	0.26157	485.8	0.24515	485.8	0.29208	485.8	0.27881	485.8	0.2883	485.8	0.29903	485.8	0.28838	485.8	0.31074
486	0.19079	486	0.19742	486	0.25435	486	0.2145	486	0.20497	486	0.22852	486	0.2569	486	0.26264	486	0.24667	486	0.29264	486	0.27924	486	0.28841	486	0.29786	486	0.28838	486	0.31074
486.2	0.19016	486.2	0.19742	486.2	0.25385	486.2	0.21412	486.2	0.20601	486.2	0.22854	486.2	0.25838	486.2	0.26306	486.2	0.24786	486.2	0.29275	486.2	0.27968	486.2	0.28841	486.2	0.29781	486.2	0.28936	486.2	0.31057
486.4	0.18908	486.4	0.19717	486.4	0.25451	486.4	0.21393	486.4	0.20697	486.4	0.229	486.4	0.25921	486.4	0.26477	486.4	0.24914	486.4	0.29342	486.4	0.28011	486.4	0.28862	486.4	0.29749	486.4	0.29007	486.4	0.3097
486.6	0.18858	486.6	0.19697	486.6	0.25542	486.6	0.21393	486.6	0.20697	486.6	0.22971	486.6	0.26079	486.6	0.26541	486.6	0.24964	486.6	0.2941	486.6	0.28033	486.6	0.28883	486.6	0.29656	486.6	0.29035	486.6	0.30907
486.8	0.1877	486.8	0.19727	486.8	0.25597	486.8	0.21393	486.8	0.20827	486.8	0.23073	486.8	0.26088	486.8	0.26669	486.8	0.25062	486.8	0.29454	486.8	0.28033	486.8	0.28935	486.8	0.29493	486.8	0.29035	486.8	0.30887
487	0.18741	487	0.19677	487	0.25547	487	0.21393	487	0.2087	487	0.23119	487	0.26273	487	0.26776	487	0.25178	487	0.29466	487	0.28033	487	0.28945	487	0.29335	487	0.29035	487	0.30827
487.2	0.18741	487.2	0.19672	487.2	0.25557	487.2	0.21563	487.2	0.21044	487.2	0.23303	487.2	0.26393	487.2	0.27031	487.2	0.25291	487.2	0.29466	487.2	0.28011	487.2	0.29008	487.2	0.29335	487.2	0.29007	487.2	0.30657
487.4	0.18737	487.4	0.19677	487.4	0.25992	487.4	0.21601	487.4	0.21235	487.4	0.23395	487.4	0.26643	487.4	0.27181	487.4	0.25455	487.4	0.29499	487.4	0.28011	487.4	0.29071	487.4	0.29335	487.4	0.28978	487.4	0.30546
487.6	0.18737	487.6	0.19677	487.6	0.25815	487.6	0.21658	487.6	0.21296	487.6	0.23464	487.6	0.26764	487.6	0.2733	487.6	0.25553	487.6	0.2951	487.6	0.28011	487.6	0.29145	487.6	0.29302	487.6	0.2888	487.6	0.30414
487.8	0.18741	487.8	0.19727	487.8	0.2583	487.8	0.21714	487.8	0.21304	487.8	0.23556	487.8	0.26764	487.8	0.27458	487.8	0.25646	487.8	0.29555	487.8	0.2799	487.8	0.29155	487.8	0.29288	487.8	0.28838	487.8	0.30323
488	0.18741	488	0.19792	488	0.25906	488	0.2179	488	0.21313	488	0.23718	488	0.26764	488	0.27479	488	0.25714	488	0.29578	488	0.27968	488	0.29155	488	0.29288	488	0.2881	488	0.30181
488.2	0.18828	488.2	0.19916	488.2	0.25972	488.2	0.21903	488.2	0.21365	488.2	0.23856	488.2	0.26773	488.2	0.27479	488.2	0.25857	488.2	0.29589	488.2	0.27946	488.2	0.29176	488.2	0.29265	488.2	0.28683	488.2	0.30083
488.4	0.18841	488.4	0.1998	488.4	0.25906	488.4	0.22111	488.4	0.21643	488.4	0.24017	488.4	0.2681	488.4	0.27522	488.4	0.26009	488.4	0.29533	488.4	0.27924	488.4	0.29197	488.4	0.29241	488.4	0.28627	488.4	0.29829
488.6	0.18866	488.6	0.1999	488.6	0.26261	488.6	0.22262	488.6	0.21721	488.6	0.24063	488.6	0.2681	488.6	0.27543	488.6	0.26137	488.6	0.2951	488.6	0.27837	488.6	0.29197	488.6	0.29199	488.6	0.28571	488.6	0.2968
488.8	0.18954	488.8	0.20055	488.8	0.2618	488.8	0.22319	488.8	0.2206	488.8	0.24224	488.8	0.2681	488.8	0.27607	488.8	0.26145	488.8	0.29488	488.8	0.2775	488.8	0.29218	488.8	0.29125	488.8	0.28557	488.8	0.29388
489	0.18958	489	0.20079	489	0.26514	489	0.22507	489	0.22164	489	0.24385	489	0.26838	489	0.27629	489	0.26151	489	0.29477	489	0.2762	489	0.29208	489	0.29125	489	0.28458	489	0.29349
489.2	0.19179	489.2	0.20243	489.2	0.26554	489.2	0.22526	489.2	0.22207	489.2	0.24478	489.2	0.26847	489.2	0.27629	489.2	0.26226	489.2	0.29443	489.2	0.27533	489.2	0.29208	489.2	0.29125	489.2	0.28289	489.2	0.29151
489.4	0.19304	489.4	0.20258	489.4	0.2661	489.4	0.22602	489.4	0.22251	489.4	0.2457	489.4	0.26856	489.4	0.27671	489.4	0.26226	489.4	0.29387	489.4	0.27468	489.4	0.29208	489.4	0.29125	489.4	0.28247	489.4	0.2911
489.6	0.19392	489.6	0.20367	489.6	0.26747	489.6	0.22753	489.6	0.22329	489.6	0.24639	489.6	0.2694	489.6	0.27692	489.6	0.26226	489.6	0.29309	489.6	0.27359	489.6	0.29218	489.6	0.29125	489.6	0.28107	489.6	0.28991
489.8	0.19425	489.8	0.20511	489.8	0.26818	489.8	0.22866	489.8	0.22485	489.8	0.24754	489.8	0.2694	489.8	0.27714	489.8	0.26226	489.8	0.29275	489.8	0.27315	489.8	0.29208	489.8	0.29116	489.8	0.27938	489.8	0.2872
490	0.19505	490	0.2065	490	0.26833	490	0.22961	490	0.22546	490	0.248	490	0.2694	490	0.27714	490	0.2619	490	0.2923	490	0.27076	490	0.29208	490	0.29116	490	0.27685	490	0.28449
490.2	0.19647	490.2	0.2065	490.2	0.26676	490.2	0.2315	490.2	0.22676	490.2	0.24846	490.2	0.2694	490.2	0.27714	490.2	0.2611	490.2	0.29152	490.2	0.26945	490.2	0.29208	490.2	0.29092	490.2	0.27558	490.2	0.28244
490.4	0.19718	490.4	0.20893	490.4	0.27122	490.4	0.23301	490.4	0.22815	490.4	0.24961	490.4	0.2694	490.4	0.27714	490.4	0.26015	490.4	0.29062	490.4	0.26728	490.4	0.29208	490.4	0.29069	490.4	0.27403	490.4	0.28059
490.6	0.19738	490.6	0.21002	490.6	0.27086	490.6	0.23395	490.6	0.22919	490.6	0.2503	490.6	0.26912	490.6	0.27714	490.6	0.26015	490.6	0.29006	490.6	0.26619	490.6	0.29208	490.6	0.2906	490.6	0.27235	490.6	0.27837
490.8	0.19809	490.8	0.21146	490.8	0.27339	490.8	0.23584	490.8	0.22962	490.8	0.25053	490.8	0.26903	490.8	0.27714	490.8	0.26	490.8	0.28838	490.8	0.26358	490.8	0.29208	490.8	0.29046	490.8	0.27094	490.8	0.27566
491	0.19993	491	0.21216	491	0.27208	491	0.23622	491	0.22962	491	0.25122	491	0.26884	491	0.27692	491	0.25973	491	0.28748	491	0.26336	491	0.29124	491	0.28967	491	0.26967	491	0.27524
491.2	0.20177	491.2	0.213	491.2	0.27365	491.2	0.23716	491.2	0.22988	491.2	0.25192	491.2	0.26884	491.2	0.27543	491.2	0.2597	491.2	0.28636	491.2	0.26206	491.2	0.2904	491.2	0.28911	491.2	0.26742	491.2	0.27214
491.4	0.20385	491.4	0.21404	491.4	0.274	491.4	0.23848	491.4	0.23058	491.4	0.25192	491.4	0.26717	491.4	0.27437	491.4	0.2591	491.4	0.2849	491.4	0.25988	491.4	0.29029	491.4	0.28739	491.4	0.26616	491.4	0.26967
491.6	0.20632	491.6	0.21439	491.6	0.27491	491.6	0.24018	491.6	0.23075	491.6	0.25192	491.6	0.26467	491.6	0.27309	491.6	0.25893	491.6	0.28322	491.6	0.25814	491.6	0.28977	491.6	0.28631	491.6	0.26334	491.6	0.26418
491.8	0.2084	491.8	0.21563	491.8	0.27461	491.8	0.24018	491.8	0.2311	491.8	0.25192	491.8	0.26282	491.8	0.27266	491.8	0.25881	491.8	0.2821	491.8	0.25531	491.8	0.2883	491.8	0.28594	491.8	0.26138	491.8	0.26241
492	0.21032	492	0.21677	492	0.27365	492	0.24188	492	0.23188	492	0.25192	492	0.26162	492	0.27266	492	0.25779	492	0.28064	492	0.25314	492	0.28778	492	0.28543	492	0.25828	492	0.25907
492.2	0.21158	492.2	0.21826	492.2	0.27547	492.2	0.24302	492.2	0.23188	492.2	0.25192	492.2	0.26004	492.2	0.27223	492.2	0.25646	492.2	0.27896	492.2	0.25118	492.2	0.28757	492.2	0.28524	492.2	0.25688	492.2	0.25691
492.4	0.2122	492.4	0.21866	492.4	0.27314	492.4	0.24339	492.4	0.23275	492.4	0.25192	492.4	0.2581	492.4	0.2701	492.4	0.25583	492.4	0.27694	492.4	0.24835	492.4	0.28704	492.4	0.28431	492.4	0.25406	492.4	0.25389
492.6	0.21354	492.6	0.21886	492.6	0.274	492.6	0.24453	492.6	0.23275	492.6	0.25192	492.6	0.25643	492.6	0.26946	492.6	0.25538	492.6	0.2756	492.6	0.24661	492.6	0.28568	492.6	0.28361	492.6	0.25252	492.6	0.25142
492.8	0.21504	492.8	0.2195	492.8	0.27516	492.8	0.24509	492.8	0.23292	492.8	0.25169	492.8	0.25523	492.8	0.2684	492.8	0.25407	492.8	0.2738	492.8	0.24378	492.8	0.28348	492.8	0.2832	492.8	0.2497	492.8	0.24798
493	0.21738	493	0.2204	493	0.27375	493	0.24547	493	0.23301	493	0.25146	493	0.2531	493	0.26733	493	0.25208	493	0.27212	493	0.24117	493	0.28159	493	0.28287	493	0.24731	493	0.24478
493.2	0.21859	493.2	0.22208	493.2	0.27309	493.2	0.24566	493.2	0.23301	493.2	0.25122	493.2	0.25153	493.2	0.26477	493.2	0.25071	493.2	0.26977	493.2	0.23878	493.2	0.28002	493.2	0.28217	493.2	0.24394	493.2	0.24137
493.4	0.21926	493.4	0.22208	493.4	0.27623	493.4	0.24604	493.4	0.23301	493.4	0.25053	493.4	0.25078	493.4	0.2637	493.4	0.24887	493.4	0.26786	493.4	0.2366	493.4	0.27855	493.4	0.28199	493.4	0.24126	493.4	0.23914
493.6	0.22034	493.6	0.22208	493.6	0.27506	493.6	0.24604	493.6	0.23301	493.6	0.24846	493.6	0.25041	493.6	0.26093	493.6	0.24762	493.6	0.26529	493.6	0.23399	493.6	0.27708	493.6	0.27994	493.6	0.23789	493.6	0.23636
493.8	0.2213	493.8	0.22208	493.8	0.27446	493.8	0.24604	493.8	0.23232	493.8	0.24777	493.8	0.25014	493.8	0.25923	493.8	0.24738	493.8	0.26316	493.8	0.2316	493.8	0.27561	493.8	0.27961	493.8	0.23606	493.8	0.234
494	0.2223	494	0.22223	494	0.27506	494	0.24604	494	0.2298	494	0.24708	494	0.24828	494	0.25688	494	0.24536	494	0.26069	494	0.22877	494	0.27383	494	0.27803	494	0.23311	494	0.23069
494.2	0.22247	494.2	0.22199	494.2	0.2739	494.2	0.24604	494.2	0.22945	494.2	0.24662	494.2	0.24523	494.2	0.25603	494.2	0.24455	494.2	0.25901	494.2	0.22703	494.2	0.27215	494.2	0.27696	494.2	0.23072	494.2	0.22836
494.4	0.22251	494.4	0.22099	494.4	0.27491	494.4	0.24585	494.4	0.2278	494.4	0.24524	494.4	0.24245	494.4	0.25304	494.4	0.24265	494.4	0.25632	494.4	0.22377	494.4	0.26974	494.4	0.27621	494.4	0.22776	494.4	0.22429
494.6	0.22289	494.6	0.22089	494.6	0.2701	494.6	0.24566	494.6	0.22468	494.6	0.24408	494.6	0.23977	494.6	0.25112	494.6	0.24048	494.6	0.25407	494.6	0.22203	494.6	0.26911	494.6	0.2744	494.6	0.22608	494.6	0.22221
494.8	0.22318	494.8	0.2205	494.8	0.27147	494.8	0.24509	494.8	0.2219	494.8	0.24247	494.8	0.23884	494.8	0.24899	494.8	0.23747	494.8	0.2515	494.8	0.21876	494.8	0.26733	494.8	0.27221	494.8	0.22214	494.8	0.21852
495	0.22418	495	0.22015	495	0.27071	495	0.24434	495	0.22164	495	0.24155	495	0.23588	495	0.24622	495	0.2347	495	0.24937	495	0.21641	495	0.26544	495	0.27151	495	0.21961	495	0.21602
495.2	0.22418	495.2	0.2197	495.2	0.27223	495.2	0.24396	495.2	0.2206	495.2	0.23994	495.2	0.23578	495.2	0.2443	495.2	0.23271	495.2	0.24634	495.2	0.21259	495.2	0.26272	495.2	0.26867	495.2	0.21637	495.2	0.21393
495.4	0.22418	495.4	0.21901	495.4	0.26605	495.4	0.24321	495.4	0.21981	495.4	0.23948	495.4	0.23541	495.4	0.24345	495.4	0.23119	495.4	0.2441	495.4	0.21074	495.4	0.26093	495.4	0.26685	495.4	0.21454	495.4	0.21122
495.6	0.22418	495.6	0.21901	495.6	0.26716	495.6	0.24245	495.6	0.21955	495.6	0.2381	495.6	0.23162	495.6	0.24068	495.6	0.22923	495.6	0.24118	495.6	0.20723	495.6	0.25946	495.6	0.26508	495.6	0.21103	495.6	0.20732
495.8	0.22368	495.8	0.21831	495.8	0.26772	495.8	0.24113	495.8	0.21947	495.8	0.23602	495.8	0.23078	495.8	0.23876	495.8	0.22723	495.8	0.23905	495.8	0.20534	495.8	0.25716	495.8	0.26369	495.8	0.20864	495.8	0.20472
496	0.22351	496	0.21663	496	0.26478	496	0.23962	496	0.21799	496	0.23234	496	0.22671	496	0.23598	496	0.22533	496	0.23614	496	0.20251	496	0.25359	496	0.26173	496	0.20582	496	0.20169
496.2	0.22347	496.2	0.21613	496.2	0.26519	496.2	0.23886	496.2	0.21634	496.2	0.23073	496.2	0.22495	496.2	0.23364	496.2	0.22316	496.2	0.23378	496.2	0.19995	496.2	0.2517	496.2	0.2608	496.2	0.20301	496.2	0.19981
496.4	0.22189	496.4	0.21439	496.4	0.26352	496.4	0.2366	496.4	0.21582	496.4	0.22914	496.4	0.22106	496.4	0.2298	496.4	0.22009	496.4	0.23087	496.4	0.19692	496.4	0.24856	496.4	0.25796	496.4	0.19992	496.4	0.19623
496.6	0.22172	496.6	0.2132	496.6	0.26175	496.6	0.23452	496.6	0.2127	496.6	0.22713	496.6	0.21939	496.6	0.22724	496.6	0.21712	496.6	0.22829	496.6	0.19442	496.6	0.24646	496.6	0.25661	496.6	0.19739	496.6	0.19244
496.8	0.22072	496.8	0.21216	496.8	0.25967	496.8	0.23263	496.8	0.2107	496.8	0.22448	496.8	0.21689	496.8	0.22426	496.8	0.21361	496.8	0.22482	496.8	0.19057	496.8	0.24384	496.8	0.25545	496.8	0.19387	496.8	0.18969
497	0.21984	497	0.21107	497	0.25466	497	0.23244	497	0.20853	497	0.22303	497	0.21282	497	0.2217	497	0.21093	497	0.22257	497	0.18735	497	0.24174	497	0.25358	497	0.19106	497	0.1882
497.2	0.2185	497.2	0.20968	497.2	0.25785	497.2	0.23131	497.2	0.20601	497.2	0.2208	497.2	0.21023	497.2	0.21914	497.2	0.20858	497.2	0.21955	497.2	0.18396	497.2	0.23902	497.2	0.25154	497.2	0.18754	497.2	0.1859
497.4	0.21734	497.4	0.20928	497.4	0.2538	497.4	0.23036	497.4	0.20471	497.4	0.21896	497.4	0.20745	497.4	0.21743	497.4	0.20652	497.4	0.21708	497.4	0.18176	497.4	0.23681	497.4	0.24944	497.4	0.18515	497.4	0.18403
497.6	0.21679	497.6	0.20774	497.6	0.25172	497.6	0.22885	497.6	0.20141	497.6	0.21626	497.6	0.20439	497.6	0.21381	497.6	0.2034	497.6	0.21361	497.6	0.17867	497.6	0.23388	497.6	0.24716	497.6	0.18192	497.6	0.18058
497.8	0.21512	497.8	0.20754	497.8	0.24975	497.8	0.22772	497.8	0.19985	497.8	0.21366	497.8	0.2018	497.8	0.21153	497.8	0.20135	497.8	0.21114	497.8	0.17591	497.8	0.23147	497.8	0.24511	497.8	0.17924	497.8	0.1793
498	0.21341	498	0.20536	498	0.2462	498	0.22564	498	0.19785	498	0.2111	498	0.19884	498	0.20852	498	0.1979	498	0.208	498	0.17338	498	0.22874	498	0.24274	498	0.17587	498	0.17565
498.2	0.2122	498.2	0.20506	498.2	0.24559	498.2	0.22375	498.2	0.19698	498.2	0.20921	498.2	0.19587	498.2	0.2057	498.2	0.19522	498.2	0.2052	498.2	0.17069	498.2	0.22591	498.2	0.24092	498.2	0.17277	498.2	0.17266
498.4	0.20995	498.4	0.20333	498.4	0.24413	498.4	0.22149	498.4	0.19594	498.4	0.20684	498.4	0.19393	498.4	0.20274	498.4	0.1926	498.4	0.20217	498.4	0.16825	498.4	0.22297	498.4	0.23924	498.4	0.16996	498.4	0.16914
498.6	0.2089	498.6	0.20174	498.6	0.24063	498.6	0.22016	498.6	0.19308	498.6	0.20525	498.6	0.19124	498.6	0.20003	498.6	0.19063	498.6	0.20004	498.6	0.16579	498.6	0.22077	498.6	0.23845	498.6	0.16771	498.6	0.1665
498.8	0.20711	498.8	0.19921	498.8	0.23638	498.8	0.2179	498.8	0.18891	498.8	0.2027	498.8	0.18754	498.8	0.19728	498.8	0.18745	498.8	0.1969	498.8	0.16255	498.8	0.21815	498.8	0.23599	498.8	0.16476	498.8	0.16344
499	0.20594	499	0.19717	499	0.23653	499	0.21639	499	0.18552	499	0.20005	499	0.18569	499	0.195	499	0.18525	499	0.19466	499	0.16059	499	0.21595	499	0.23343	499	0.16251	499	0.16174
499.2	0.20506	499.2	0.19702	499.2	0.2339	499.2	0.21393	499.2	0.18422	499.2	0.19777	499.2	0.18254	499.2	0.19197	499.2	0.18177	499.2	0.19152	499.2	0.15787	499.2	0.21364	499.2	0.22998	499.2	0.1597	499.2	0.15885
499.4	0.20269	499.4	0.19553	499.4	0.23288	499.4	0.21223	499.4	0.18275	499.4	0.19468	499.4	0.17976	499.4	0.18995	499.4	0.17832	499.4	0.18939	499.4	0.15509	499.4	0.21102	499.4	0.22835	499.4	0.15745	499.4	0.1568
499.6	0.20173	499.6	0.19305	499.6	0.22919	499.6	0.20997	499.6	0.18092	499.6	0.19143	499.6	0.17726	499.6	0.18683	499.6	0.17701	499.6	0.18637	499.6	0.15213	499.6	0.20798	499.6	0.22518	499.6	0.15463	499.6	0.1545
499.8	0.19872	499.8	0.19102	499.8	0.22848	499.8	0.20751	499.8	0.1778	499.8	0.19012	499.8	0.17337	499.8	0.18366	499.8	0.17433	499.8	0.18379	499.8	0.15002	499.8	0.20546	499.8	0.22267	499.8	0.15294	499.8	0.15179
500	0.19601	500	0.18893	500	0.22301	500	0.20487	500	0.17606	500	0.18738	500	0.17198	500	0.18078	500	0.17049	500	0.18065	500	0.14686	500	0.20305	500	0.22113	500	0.15013	500	0.14991
500.2	0.1948	500.2	0.18764	500.2	0.22367	500.2	0.20335	500.2	0.17424	500.2	0.18551	500.2	0.16921	500.2	0.17792	500.2	0.16894	500.2	0.17852	500.2	0.14599	500.2	0.20106	500.2	0.21992	500.2	0.14802	500.2	0.14772
500.4	0.19283	500.4	0.18417	500.4	0.22185	500.4	0.20147	500.4	0.17198	500.4	0.18245	500.4	0.16606	500.4	0.17498	500.4	0.16552	500.4	0.1756	500.4	0.14343	500.4	0.19812	500.4	0.21811	500.4	0.14563	500.4	0.14518
500.6	0.19217	500.6	0.18308	500.6	0.22002	500.6	0.19977	500.6	0.16938	500.6	0.1792	500.6	0.16374	500.6	0.17261	500.6	0.16394	500.6	0.17325	500.6	0.14158	500.6	0.19613	500.6	0.21643	500.6	0.14423	500.6	0.14348
500.8	0.18983	500.8	0.18179	500.8	0.21602	500.8	0.19731	500.8	0.16573	500.8	0.17605	500.8	0.16059	500.8	0.17022	500.8	0.16103	500.8	0.17045	500.8	0.13968	500.8	0.19372	500.8	0.21313	500.8	0.14141	500.8	0.14111
501	0.18787	501	0.17945	501	0.20985	501	0.19486	501	0.16382	501	0.17377	501	0.15809	501	0.16875	501	0.15942	501	0.16832	501	0.13807	501	0.19162	501	0.2121	501	0.13888	501	0.13913
501.2	0.18566	501.2	0.17687	501.2	0.20964	501.2	0.19202	501.2	0.16217	501.2	0.17112	501.2	0.1555	501.2	0.16543	501.2	0.15588	501.2	0.16529	501.2	0.13488	501.2	0.18826	501.2	0.2094	501.2	0.1367	501.2	0.13673
501.4	0.18307	501.4	0.17653	501.4	0.20539	501.4	0.19013	501.4	0.15922	501.4	0.16794	501.4	0.15365	501.4	0.16378	501.4	0.15341	501.4	0.16271	501.4	0.13261	501.4	0.18596	501.4	0.20745	501.4	0.13497	501.4	0.13552
501.6	0.18073	501.6	0.17419	501.6	0.20311	501.6	0.18717	501.6	0.15635	501.6	0.16483	501.6	0.15004	501.6	0.16067	501.6	0.15043	501.6	0.15991	501.6	0.13013	501.6	0.18312	501.6	0.206	501.6	0.13281	501.6	0.13291
501.8	0.17856	501.8	0.1729	501.8	0.20043	501.8	0.18443	501.8	0.15505	501.8	0.16283	501.8	0.14819	501.8	0.15832	501.8	0.14856	501.8	0.15778	501.8	0.12794	501.8	0.1805	501.8	0.20367	501.8	0.13169	501.8	0.13166
502	0.17597	502	0.16998	502	0.19952	502	0.18105	502	0.15332	502	0.15995	502	0.14439	502	0.15472	502	0.14576	502	0.15509	502	0.12569	502	0.17799	502	0.20153	502	0.12899	502	0.12943
502.2	0.17526	502.2	0.16754	502.2	0.19795	502.2	0.17929	502.2	0.15106	502.2	0.15824	502.2	0.14189	502.2	0.15308	502.2	0.1441	502.2	0.15307	502.2	0.12374	502.2	0.17578	502.2	0.19813	502.2	0.12693	502.2	0.12804
502.4	0.17359	502.4	0.16457	502.4	0.1944	502.4	0.17561	502.4	0.1475	502.4	0.15488	502.4	0.13939	502.4	0.15035	502.4	0.1413	502.4	0.15049	502.4	0.12226	502.4	0.17274	502.4	0.19488	502.4	0.12438	502.4	0.12623
502.6	0.17142	502.6	0.16208	502.6	0.19248	502.6	0.17332	502.6	0.14542	502.6	0.15216	502.6	0.13874	502.6	0.14768	502.6	0.13975	502.6	0.14836	502.6	0.1205	502.6	0.17086	502.6	0.19394	502.6	0.12223	502.6	0.12456
502.8	0.16858	502.8	0.16074	502.8	0.18863	502.8	0.16994	502.8	0.14246	502.8	0.14887	502.8	0.13615	502.8	0.14513	502.8	0.13693	502.8	0.14567	502.8	0.11784	502.8	0.16813	502.8	0.19036	502.8	0.1205	502.8	0.12216
503	0.16566	503	0.15866	503	0.18463	503	0.1679	503	0.13917	503	0.14659	503	0.13189	503	0.14304	503	0.13457	503	0.14365	503	0.11662	503	0.16603	503	0.19008	503	0.11894	503	0.12029
503.2	0.16332	503.2	0.15593	503.2	0.18225	503.2	0.16505	503.2	0.13639	503.2	0.1447	503.2	0.12985	503.2	0.13999	503.2	0.1321	503.2	0.14108	503.2	0.11403	503.2	0.16268	503.2	0.1864	503.2	0.11728	503.2	0.11851
503.4	0.16124	503.4	0.1537	503.4	0.17769	503.4	0.16258	503.4	0.13404	503.4	0.14281	503.4	0.12726	503.4	0.13813	503.4	0.13023	503.4	0.13906	503.4	0.11284	503.4	0.16089	503.4	0.18398	503.4	0.11555	503.4	0.11723
503.6	0.15811	503.6	0.14983	503.6	0.178	503.6	0.15952	503.6	0.13291	503.6	0.14067	503.6	0.12485	503.6	0.13574	503.6	0.12681	503.6	0.1367	503.6	0.11086	503.6	0.15838	503.6	0.18198	503.6	0.11337	503.6	0.11545
503.8	0.15544	503.8	0.14868	503.8	0.1743	503.8	0.15812	503.8	0.12883	503.8	0.13876	503.8	0.12392	503.8	0.13431	503.8	0.12458	503.8	0.13491	503.8	0.10942	503.8	0.1568	503.8	0.17937	503.8	0.11262	503.8	0.11472
504	0.15168	504	0.14715	504	0.17212	504	0.15565	504	0.1271	504	0.13551	504	0.12096	504	0.13195	504	0.12297	504	0.13278	504	0.10705	504	0.15387	504	0.17662	504	0.11089	504	0.11236
504.2	0.1498	504.2	0.14521	504.2	0.16843	504.2	0.15281	504.2	0.12545	504.2	0.13413	504.2	0.12096	504.2	0.12979	504.2	0.12142	504.2	0.13076	504.2	0.10585	504.2	0.15167	504.2	0.17434	504.2	0.10907	504.2	0.11131
504.4	0.14734	504.4	0.14109	504.4	0.16995	504.4	0.14987	504.4	0.12354	504.4	0.13074	504.4	0.11929	504.4	0.12743	504.4	0.11883	504.4	0.12841	504.4	0.10459	504.4	0.14883	504.4	0.17113	504.4	0.10708	504.4	0.10964
504.6	0.14579	504.6	0.13975	504.6	0.16458	504.6	0.14768	504.6	0.12137	504.6	0.12846	504.6	0.11865	504.6	0.12544	504.6	0.11758	504.6	0.12662	504.6	0.10366	504.6	0.14632	504.6	0.16913	504.6	0.10568	504.6	0.10871
504.8	0.14312	504.8	0.13732	504.8	0.16083	504.8	0.14448	504.8	0.12015	504.8	0.12657	504.8	0.1167	504.8	0.12303	504.8	0.11556	504.8	0.12415	504.8	0.10189	504.8	0.1438	504.8	0.16638	504.8	0.1039	504.8	0.10645
505	0.14129	505	0.13469	505	0.16083	505	0.14258	505	0.11651	505	0.12452	505	0.11457	505	0.12112	505	0.11413	505	0.12258	505	0.10081	505	0.1416	505	0.1641	505	0.10265	505	0.10533
505.2	0.13807	505.2	0.13206	505.2	0.15592	505.2	0.14001	505.2	0.1139	505.2	0.12282	505.2	0.11207	505.2	0.11943	505.2	0.11217	505.2	0.1209	505.2	0.09876	505.2	0.13982	505.2	0.16135	505.2	0.10154	505.2	0.10394
505.4	0.13661	505.4	0.13092	505.4	0.15455	505.4	0.13772	505.4	0.11295	505.4	0.11983	505.4	0.10929	505.4	0.11828	505.4	0.11047	505.4	0.11944	505.4	0.09796	505.4	0.13761	505.4	0.15884	505.4	0.10032	505.4	0.10234
505.6	0.13231	505.6	0.12779	505.6	0.15389	505.6	0.13546	505.6	0.11104	505.6	0.11785	505.6	0.10753	505.6	0.11621	505.6	0.10845	505.6	0.11753	505.6	0.09635	505.6	0.13573	505.6	0.15614	505.6	0.09876	505.6	0.1022
505.8	0.12964	505.8	0.12531	505.8	0.14984	505.8	0.13315	505.8	0.10982	505.8	0.11635	505.8	0.10652	505.8	0.11442	505.8	0.10681	505.8	0.11597	505.8	0.09537	505.8	0.13394	505.8	0.15363	505.8	0.09829	505.8	0.10116
506	0.12739	506	0.12159	506	0.14746	506	0.13058	506	0.10678	506	0.11384	506	0.10476	506	0.1128	506	0.10479	506	0.11395	506	0.09374	506	0.13153	506	0.15237	506	0.09665	506	0.09946
506.2	0.12555	506.2	0.11985	506.2	0.14382	506.2	0.12788	506.2	0.10496	506.2	0.11243	506.2	0.10216	506.2	0.1109	506.2	0.1033	506.2	0.11249	506.2	0.09241	506.2	0.12975	506.2	0.15074	506.2	0.09552	506.2	0.09803
506.4	0.12246	506.4	0.11836	506.4	0.14336	506.4	0.12522	506.4	0.10201	506.4	0.1105	506.4	0.1005	506.4	0.10909	506.4	0.1011	506.4	0.11064	506.4	0.09091	506.4	0.12744	506.4	0.14771	506.4	0.09406	506.4	0.09633
506.6	0.12096	506.6	0.11672	506.6	0.14174	506.6	0.1238	506.6	0.10114	506.6	0.10845	506.6	0.09948	506.6	0.10794	506.6	0.09946	506.6	0.10931	506.6	0.09032	506.6	0.12566	506.6	0.14599	506.6	0.09288	506.6	0.09587
506.8	0.1177	506.8	0.11444	506.8	0.13678	506.8	0.12154	506.8	0.0994	506.8	0.10638	506.8	0.09763	506.8	0.10636	506.8	0.09848	506.8	0.1077	506.8	0.08897	506.8	0.12346	506.8	0.14399	506.8	0.09178	506.8	0.09459
507	0.11641	507	0.11285	507	0.13612	507	0.11959	507	0.09732	507	0.10444	507	0.09707	507	0.10525	507	0.09714	507	0.10635	507	0.08775	507	0.12136	507	0.14096	507	0.09066	507	0.09365
507.2	0.11415	507.2	0.11052	507.2	0.13329	507.2	0.11721	507.2	0.09489	507.2	0.10214	507.2	0.09587	507.2	0.10384	507.2	0.09634	507.2	0.10464	507.2	0.08664	507.2	0.11916	507.2	0.13789	507.2	0.08912	507.2	0.09219
507.4	0.11211	507.4	0.10834	507.4	0.12954	507.4	0.11427	507.4	0.0935	507.4	0.10099	507.4	0.0955	507.4	0.10216	507.4	0.09521	507.4	0.10341	507.4	0.08593	507.4	0.11811	507.4	0.13626	507.4	0.08832	507.4	0.0909
507.6	0.10994	507.6	0.10536	507.6	0.12736	507.6	0.11211	507.6	0.09229	507.6	0.09852	507.6	0.09392	507.6	0.10032	507.6	0.0933	507.6	0.10159	507.6	0.08479	507.6	0.11622	507.6	0.13412	507.6	0.08694	507.6	0.0901
507.8	0.10856	507.8	0.10377	507.8	0.1264	507.8	0.11072	507.8	0.0909	507.8	0.09765	507.8	0.09263	507.8	0.09873	507.8	0.0917	507.8	0.10054	507.8	0.08342	507.8	0.11434	507.8	0.13137	507.8	0.08589	507.8	0.08941
508	0.10643	508	0.10223	508	0.12534	508	0.10845	508	0.08951	508	0.09592	508	0.09064	508	0.097	508	0.08997	508	0.09889	508	0.08192	508	0.11287	508	0.12941	508	0.08492	508	0.08795
508.2	0.10439	508.2	0.10084	508.2	0.12215	508.2	0.10699	508.2	0.08829	508.2	0.09502	508.2	0.08917	508.2	0.09578	508.2	0.08938	508.2	0.09786	508.2	0.08121	508.2	0.11161	508.2	0.12806	508.2	0.0843	508.2	0.08749
508.4	0.10326	508.4	0.0998	508.4	0.12027	508.4	0.10473	508.4	0.08682	508.4	0.09327	508.4	0.08776	508.4	0.0941	508.4	0.0883	508.4	0.09664	508.4	0.08075	508.4	0.10983	508.4	0.12495	508.4	0.08316	508.4	0.08572
508.6	0.10142	508.6	0.09816	508.6	0.12007	508.6	0.10363	508.6	0.08589	508.6	0.09152	508.6	0.08685	508.6	0.09327	508.6	0.0867	508.6	0.09568	508.6	0.08005	508.6	0.10836	508.6	0.12304	508.6	0.08268	508.6	0.08569
508.8	0.0995	508.8	0.09667	508.8	0.11799	508.8	0.10205	508.8	0.08519	508.8	0.09074	508.8	0.08551	508.8	0.09173	508.8	0.08494	508.8	0.09437	508.8	0.07909	508.8	0.10689	508.8	0.1215	508.8	0.08173	508.8	0.08509
509	0.09721	509	0.09434	509	0.11551	509	0.10095	509	0.08387	509	0.08984	509	0.08333	509	0.09094	509	0.0842	509	0.0934	509	0.07816	509	0.10542	509	0.12001	509	0.08077	509	0.08443
509.2	0.09546	509.2	0.09206	509.2	0.11582	509.2	0.09857	509.2	0.08202	509.2	0.08804	509.2	0.083	509.2	0.08975	509.2	0.08235	509.2	0.09213	509.2	0.07718	509.2	0.10385	509.2	0.11754	509.2	0.08001	509.2	0.08318
509.4	0.09391	509.4	0.09037	509.4	0.11197	509.4	0.09723	509.4	0.08004	509.4	0.08631	509.4	0.08281	509.4	0.08809	509.4	0.08086	509.4	0.09101	509.4	0.07627	509.4	0.1026	509.4	0.11643	509.4	0.07911	509.4	0.08245
509.6	0.09258	509.6	0.08898	509.6	0.10949	509.6	0.0953	509.6	0.07876	509.6	0.08558	509.6	0.08117	509.6	0.08704	509.6	0.07964	509.6	0.08974	509.6	0.07557	509.6	0.10103	509.6	0.1141	509.6	0.07803	509.6	0.08193
509.8	0.09149	509.8	0.08769	509.8	0.10878	509.8	0.09421	509.8	0.07809	509.8	0.08475	509.8	0.0794	509.8	0.08565	509.8	0.07887	509.8	0.08893	509.8	0.07466	509.8	0.09975	509.8	0.11289	509.8	0.07758	509.8	0.08155
510	0.08928	510	0.08586	510	0.10827	510	0.09245	510	0.07743	510	0.08348	510	0.07845	510	0.08463	510	0.0781	510	0.08772	510	0.0737	510	0.09814	510	0.11051	510	0.07659	510	0.08089
510.2	0.08761	510.2	0.08496	510.2	0.10432	510.2	0.09124	510.2	0.0759	510.2	0.08217	510.2	0.07799	510.2	0.08365	510.2	0.07718	510.2	0.0868	510.2	0.07335	510.2	0.097	510.2	0.10967	510.2	0.07588	510.2	0.08016
510.4	0.08565	510.4	0.08323	510.4	0.10382	510.4	0.08975	510.4	0.07431	510.4	0.08046	510.4	0.07718	510.4	0.08278	510.4	0.07628	510.4	0.08569	510.4	0.07285	510.4	0.09572	510.4	0.10874	510.4	0.07526	510.4	0.0797
510.6	0.08452	510.6	0.08243	510.6	0.10366	510.6	0.08807	510.6	0.07421	510.6	0.07968	510.6	0.07621	510.6	0.08188	510.6	0.07566	510.6	0.08497	510.6	0.07226	510.6	0.09466	510.6	0.10767	510.6	0.07434	510.6	0.07894
510.8	0.08331	510.8	0.08144	510.8	0.10134	510.8	0.08607	510.8	0.07195	510.8	0.07841	510.8	0.0752	510.8	0.08054	510.8	0.07438	510.8	0.08386	510.8	0.07122	510.8	0.09342	510.8	0.10609	510.8	0.07356	510.8	0.07797
511	0.08185	511	0.07945	511	0.09966	511	0.08509	511	0.07068	511	0.07775	511	0.07377	511	0.07956	511	0.07384	511	0.0829	511	0.07061	511	0.09226	511	0.10451	511	0.07277	511	0.07786
511.2	0.08039	511.2	0.07806	511.2	0.09855	511.2	0.08363	511.2	0.06996	511.2	0.07655	511.2	0.07306	511.2	0.07868	511.2	0.07268	511.2	0.08191	511.2	0.07028	511.2	0.09118	511.2	0.1026	511.2	0.07185	511.2	0.0771
511.4	0.07884	511.4	0.07697	511.4	0.09713	511.4	0.08257	511.4	0.06928	511.4	0.07549	511.4	0.07216	511.4	0.07811	511.4	0.07176	511.4	0.08125	511.4	0.06954	511.4	0.0901	511.4	0.10074	511.4	0.07111	511.4	0.07644
511.6	0.07847	511.6	0.07598	511.6	0.09612	511.6	0.08087	511.6	0.06774	511.6	0.07436	511.6	0.07196	511.6	0.07719	511.6	0.07128	511.6	0.08032	511.6	0.06885	511.6	0.08896	511.6	0.09836	511.6	0.07056	511.6	0.07619
511.8	0.0778	511.8	0.07484	511.8	0.09404	511.8	0.08004	511.8	0.06703	511.8	0.07344	511.8	0.07125	511.8	0.07674	511.8	0.07048	511.8	0.07958	511.8	0.06793	511.8	0.0881	511.8	0.09794	511.8	0.07032	511.8	0.0757
512	0.07596	512	0.0735	512	0.09253	512	0.07876	512	0.06578	512	0.07252	512	0.07036	512	0.07559	512	0.06962	512	0.07862	512	0.0673	512	0.08712	512	0.09734	512	0.06967	512	0.07497
512.2	0.07459	512.2	0.07256	512.2	0.09096	512.2	0.07749	512.2	0.06454	512.2	0.07139	512.2	0.06911	512.2	0.07457	512.2	0.06896	512.2	0.07782	512.2	0.06674	512.2	0.08561	512.2	0.09571	512.2	0.0692	512.2	0.07456
512.4	0.07262	512.4	0.07132	512.4	0.09015	512.4	0.07608	512.4	0.06353	512.4	0.07074	512.4	0.06846	512.4	0.07369	512.4	0.06798	512.4	0.07693	512.4	0.06626	512.4	0.08416	512.4	0.09431	512.4	0.06882	512.4	0.07355
512.6	0.07162	512.6	0.06938	512.6	0.08766	512.6	0.075	512.6	0.06197	512.6	0.06941	512.6	0.06801	512.6	0.07273	512.6	0.067	512.6	0.07619	512.6	0.06572	512.6	0.08335	512.6	0.09384	512.6	0.06783	512.6	0.0724
512.8	0.0707	512.8	0.06819	512.8	0.08822	512.8	0.07362	512.8	0.06191	512.8	0.06849	512.8	0.06796	512.8	0.07199	512.8	0.06631	512.8	0.07545	512.8	0.06519	512.8	0.08258	512.8	0.09249	512.8	0.06693	512.8	0.07209
513	0.07012	513	0.067	513	0.0865	513	0.07305	513	0.06026	513	0.0678	513	0.06748	513	0.07128	513	0.06533	513	0.07481	513	0.06424	513	0.08185	513	0.09087	513	0.06657	513	0.07184
513.2	0.06874	513.2	0.06566	513.2	0.08584	513.2	0.072	513.2	0.05994	513.2	0.06669	513.2	0.06576	513.2	0.07083	513.2	0.06447	513.2	0.07407	513.2	0.06347	513.2	0.08073	513.2	0.08905	513.2	0.0661	513.2	0.07146
513.4	0.0682	513.4	0.06526	513.4	0.08407	513.4	0.07128	513.4	0.05864	513.4	0.06584	513.4	0.06526	513.4	0.07041	513.4	0.0637	513.4	0.07348	513.4	0.06341	513.4	0.08022	513.4	0.08826	513.4	0.06565	513.4	0.07087
513.6	0.06716	513.6	0.06481	513.6	0.08331	513.6	0.06998	513.6	0.05775	513.6	0.0651	513.6	0.06382	513.6	0.06996	513.6	0.06271	513.6	0.07281	513.6	0.06306	513.6	0.07912	513.6	0.08733	513.6	0.06503	513.6	0.07042
513.8	0.06582	513.8	0.06377	513.8	0.08078	513.8	0.06924	513.8	0.05705	513.8	0.06478	513.8	0.06364	513.8	0.06911	513.8	0.06233	513.8	0.07231	513.8	0.06297	513.8	0.07857	513.8	0.08621	513.8	0.0646	513.8	0.07014
514	0.06423	514	0.06278	514	0.08063	514	0.06822	514	0.05621	514	0.06411	514	0.06255	514	0.06819	514	0.06164	514	0.07145	514	0.0621	514	0.07759	514	0.0843	514	0.06418	514	0.06927
514.2	0.06415	514.2	0.06169	514.2	0.07956	514.2	0.06775	514.2	0.05613	514.2	0.06347	514.2	0.06174	514.2	0.06787	514.2	0.06117	514.2	0.07096	514.2	0.06195	514.2	0.07656	514.2	0.08356	514.2	0.06387	514.2	0.06882
514.4	0.06332	514.4	0.06079	514.4	0.07997	514.4	0.06663	514.4	0.05592	514.4	0.0628	514.4	0.06173	514.4	0.06693	514.4	0.06069	514.4	0.07018	514.4	0.06134	514.4	0.07598	514.4	0.08309	514.4	0.06367	514.4	0.06861
514.6	0.06227	514.6	0.06045	514.6	0.07906	514.6	0.06565	514.6	0.05544	514.6	0.06208	514.6	0.06117	514.6	0.06612	514.6	0.06018	514.6	0.06967	514.6	0.06093	514.6	0.07511	514.6	0.08221	514.6	0.06335	514.6	0.06854
514.8	0.06069	514.8	0.06	514.8	0.07789	514.8	0.06471	514.8	0.05528	514.8	0.06093	514.8	0.06091	514.8	0.06542	514.8	0.06004	514.8	0.06898	514.8	0.0608	514.8	0.07408	514.8	0.08072	514.8	0.0632	514.8	0.06819
515	0.06027	515	0.0595	515	0.07632	515	0.06456	515	0.05389	515	0.06047	515	0.0608	515	0.06482	515	0.05923	515	0.06856	515	0.06054	515	0.07361	515	0.08025	515	0.0629	515	0.0676
515.2	0.0591	515.2	0.05881	515.2	0.07521	515.2	0.06384	515.2	0.05352	515.2	0.05967	515.2	0.06047	515.2	0.06442	515.2	0.0589	515.2	0.06803	515.2	0.06015	515.2	0.07267	515.2	0.07899	515.2	0.06257	515.2	0.06725
515.4	0.05831	515.4	0.05821	515.4	0.07465	515.4	0.06274	515.4	0.05349	515.4	0.05909	515.4	0.05982	515.4	0.06395	515.4	0.05843	515.4	0.06738	515.4	0.05958	515.4	0.07238	515.4	0.07881	515.4	0.06216	515.4	0.06677
515.6	0.0576	515.6	0.05717	515.6	0.07278	515.6	0.06186	515.6	0.05279	515.6	0.05801	515.6	0.0593	515.6	0.06333	515.6	0.05795	515.6	0.06684	515.6	0.05923	515.6	0.07167	515.6	0.07727	515.6	0.06198	515.6	0.0659
515.8	0.05685	515.8	0.05583	515.8	0.07237	515.8	0.06144	515.8	0.05181	515.8	0.05775	515.8	0.05904	515.8	0.06292	515.8	0.05724	515.8	0.06633	515.8	0.05851	515.8	0.07083	515.8	0.07634	515.8	0.06153	515.8	0.06569
516	0.05614	516	0.05578	516	0.07212	516	0.06076	516	0.05125	516	0.05679	516	0.05884	516	0.06194	516	0.05638	516	0.06583	516	0.05825	516	0.07039	516	0.07611	516	0.06087	516	0.06545
516.2	0.05564	516.2	0.05524	516.2	0.07177	516.2	0.06019	516.2	0.05124	516.2	0.05674	516.2	0.05726	516.2	0.0613	516.2	0.0562	516.2	0.06526	516.2	0.05806	516.2	0.06972	516.2	0.07522	516.2	0.06059	516.2	0.06496
516.4	0.05526	516.4	0.05424	516.4	0.07106	516.4	0.05944	516.4	0.05039	516.4	0.05614	516.4	0.05705	516.4	0.06075	516.4	0.05584	516.4	0.0648	516.4	0.05786	516.4	0.06931	516.4	0.07499	516.4	0.06015	516.4	0.06454
516.6	0.05501	516.6	0.05414	516.6	0.06994	516.6	0.05914	516.6	0.04997	516.6	0.05582	516.6	0.05684	516.6	0.06062	516.6	0.05533	516.6	0.0644	516.6	0.05756	516.6	0.06849	516.6	0.07429	516.6	0.05959	516.6	0.06444
516.8	0.05413	516.8	0.05355	516.8	0.06832	516.8	0.05844	516.8	0.04948	516.8	0.05518	516.8	0.05661	516.8	0.06002	516.8	0.05492	516.8	0.06392	516.8	0.05751	516.8	0.06793	516.8	0.07415	516.8	0.05931	516.8	0.06399
517	0.05405	517	0.0533	517	0.06822	517	0.05812	517	0.04836	517	0.05499	517	0.05638	517	0.05973	517	0.05489	517	0.06351	517	0.05747	517	0.06749	517	0.07322	517	0.05906	517	0.06371
517.2	0.05317	517.2	0.05201	517.2	0.06746	517.2	0.05721	517.2	0.04814	517.2	0.05435	517.2	0.05632	517.2	0.059	517.2	0.05438	517.2	0.06305	517.2	0.05688	517.2	0.06702	517.2	0.07229	517.2	0.05868	517.2	0.06266
517.4	0.05263	517.4	0.05112	517.4	0.0662	517.4	0.05679	517.4	0.04777	517.4	0.0537	517.4	0.0562	517.4	0.05864	517.4	0.05388	517.4	0.06273	517.4	0.05619	517.4	0.06626	517.4	0.07131	517.4	0.0581	517.4	0.06256
517.6	0.05217	517.6	0.05077	517.6	0.06655	517.6	0.05598	517.6	0.04774	517.6	0.05359	517.6	0.05602	517.6	0.05834	517.6	0.05379	517.6	0.06224	517.6	0.05573	517.6	0.06571	517.6	0.07024	517.6	0.0579	517.6	0.06256
517.8	0.05188	517.8	0.05052	517.8	0.0665	517.8	0.05549	517.8	0.04753	517.8	0.05326	517.8	0.05579	517.8	0.0583	517.8	0.05322	517.8	0.06184	517.8	0.05571	517.8	0.06499	517.8	0.06982	517.8	0.05782	517.8	0.06207
518	0.05134	518	0.04942	518	0.06468	518	0.05475	518	0.0474	518	0.05306	518	0.05464	518	0.05772	518	0.05251	518	0.06142	518	0.05525	518	0.06449	518	0.06931	518	0.05749	518	0.06162
518.2	0.05071	518.2	0.04903	518.2	0.06407	518.2	0.054	518.2	0.0469	518.2	0.05299	518.2	0.05461	518.2	0.05744	518.2	0.05251	518.2	0.06111	518.2	0.05506	518.2	0.06385	518.2	0.0688	518.2	0.05749	518.2	0.06162
518.4	0.05046	518.4	0.04842	518.4	0.06387	518.4	0.05356	518.4	0.04563	518.4	0.05227	518.4	0.05427	518.4	0.05744	518.4	0.05245	518.4	0.06067	518.4	0.05488	518.4	0.06376	518.4	0.06791	518.4	0.05704	518.4	0.06103
518.6	0.04958	518.6	0.04795	518.6	0.0622	518.6	0.05292	518.6	0.04513	518.6	0.05209	518.6	0.05422	518.6	0.05678	518.6	0.05212	518.6	0.06027	518.6	0.05449	518.6	0.06305	518.6	0.06693	518.6	0.05686	518.6	0.06054
518.8	0.04892	518.8	0.04708	518.8	0.06199	518.8	0.05258	518.8	0.04503	518.8	0.05114	518.8	0.05361	518.8	0.05644	518.8	0.05141	518.8	0.05989	518.8	0.05412	518.8	0.06247	518.8	0.06656	518.8	0.05622	518.8	0.05999
519	0.04825	519	0.04698	519	0.06174	519	0.05185	519	0.04494	519	0.05075	519	0.05332	519	0.05595	519	0.05129	519	0.05963	519	0.05392	519	0.06205	519	0.06596	519	0.05599	519	0.05922
519.2	0.04796	519.2	0.04679	519.2	0.06179	519.2	0.05171	519.2	0.04488	519.2	0.05052	519.2	0.05301	519.2	0.05567	519.2	0.05108	519.2	0.05904	519.2	0.05377	519.2	0.06184	519.2	0.0653	519.2	0.05582	519.2	0.05901
519.4	0.04779	519.4	0.04658	519.4	0.06093	519.4	0.05168	519.4	0.04454	519.4	0.05048	519.4	0.05265	519.4	0.05559	519.4	0.05102	519.4	0.05873	519.4	0.05349	519.4	0.06163	519.4	0.06442	519.4	0.05537	519.4	0.05901
519.6	0.04725	519.6	0.04632	519.6	0.06007	519.6	0.05067	519.6	0.04325	519.6	0.05045	519.6	0.05258	519.6	0.05471	519.6	0.05081	519.6	0.0584	519.6	0.05301	519.6	0.06109	519.6	0.06423	519.6	0.05508	519.6	0.05884
519.8	0.0467	519.8	0.0463	519.8	0.05987	519.8	0.0503	519.8	0.04295	519.8	0.05043	519.8	0.05247	519.8	0.05467	519.8	0.05078	519.8	0.0581	519.8	0.05268	519.8	0.06096	519.8	0.06414	519.8	0.05485	519.8	0.05849
520	0.04624	520	0.04585	520	0.05971	520	0.04984	520	0.04213	520	0.04979	520	0.052	520	0.05452	520	0.05057	520	0.05775	520	0.05207	520	0.06051	520	0.06372	520	0.05446	520	0.05842
520.2	0.04587	520.2	0.04546	520.2	0.06002	520.2	0.04937	520.2	0.04191	520.2	0.04939	520.2	0.0519	520.2	0.05412	520.2	0.05054	520.2	0.05743	520.2	0.05179	520.2	0.05985	520.2	0.06316	520.2	0.0542	520.2	0.05734
520.4	0.04499	520.4	0.04451	520.4	0.05799	520.4	0.04905	520.4	0.04183	520.4	0.049	520.4	0.05095	520.4	0.05405	520.4	0.0501	520.4	0.05712	520.4	0.05173	520.4	0.0594	520.4	0.06256	520.4	0.05402	520.4	0.05668
520.6	0.04474	520.6	0.04383	520.6	0.05814	520.6	0.04869	520.6	0.04156	520.6	0.0487	520.6	0.05087	520.6	0.05375	520.6	0.04929	520.6	0.05683	520.6	0.05147	520.6	0.05918	520.6	0.06158	520.6	0.05346	520.6	0.05609
520.8	0.04449	520.8	0.04315	520.8	0.05698	520.8	0.0479	520.8	0.04156	520.8	0.04792	520.8	0.05083	520.8	0.05365	520.8	0.04914	520.8	0.05642	520.8	0.05138	520.8	0.05871	520.8	0.0613	520.8	0.05301	520.8	0.05568
521	0.04391	521	0.04259	521	0.0584	521	0.04754	521	0.04156	521	0.04776	521	0.05067	521	0.05316	521	0.04912	521	0.05616	521	0.05114	521	0.05832	521	0.06093	521	0.05299	521	0.05498
521.2	0.0437	521.2	0.04244	521.2	0.05683	521.2	0.04754	521.2	0.04136	521.2	0.04764	521.2	0.04973	521.2	0.0529	521.2	0.04843	521.2	0.05572	521.2	0.05086	521.2	0.05789	521.2	0.06051	521.2	0.0526	521.2	0.0546
521.4	0.04353	521.4	0.04243	521.4	0.05723	521.4	0.04737	521.4	0.04116	521.4	0.04732	521.4	0.04963	521.4	0.05286	521.4	0.0479	521.4	0.05545	521.4	0.05079	521.4	0.05768	521.4	0.06051	521.4	0.05249	521.4	0.05442
521.6	0.04324	521.6	0.04216	521.6	0.05749	521.6	0.04729	521.6	0.04116	521.6	0.04732	521.6	0.04895	521.6	0.05277	521.6	0.04769	521.6	0.05507	521.6	0.0501	521.6	0.05722	521.6	0.05944	521.6	0.05205	521.6	0.05421
521.8	0.04265	521.8	0.04194	521.8	0.05597	521.8	0.04695	521.8	0.041	521.8	0.04723	521.8	0.04876	521.8	0.05256	521.8	0.0473	521.8	0.05475	521.8	0.04996	521.8	0.05686	521.8	0.05888	521.8	0.05156	521.8	0.05376
522	0.0424	522	0.04133	522	0.05642	522	0.04661	522	0.04089	522	0.04684	522	0.04819	522	0.05252	522	0.04721	522	0.0544	522	0.04929	522	0.05638	522	0.05827	522	0.05129	522	0.05317
522.2	0.04236	522.2	0.04091	522.2	0.05592	522.2	0.04614	522.2	0.04031	522.2	0.04679	522.2	0.04813	522.2	0.05203	522.2	0.04691	522.2	0.05409	522.2	0.04918	522.2	0.05585	522.2	0.05767	522.2	0.05104	522.2	0.05289
522.4	0.04169	522.4	0.0408	522.4	0.05592	522.4	0.04586	522.4	0.04022	522.4	0.04677	522.4	0.048	522.4	0.05171	522.4	0.04688	522.4	0.05373	522.4	0.04914	522.4	0.05566	522.4	0.05753	522.4	0.05072	522.4	0.05268
522.6	0.04132	522.6	0.04046	522.6	0.05414	522.6	0.04537	522.6	0.03993	522.6	0.04573	522.6	0.048	522.6	0.05158	522.6	0.04676	522.6	0.05354	522.6	0.04896	522.6	0.05557	522.6	0.05748	522.6	0.05035	522.6	0.05265
522.8	0.04114	522.8	0.04024	522.8	0.0549	522.8	0.04518	522.8	0.03967	522.8	0.04573	522.8	0.04795	522.8	0.05098	522.8	0.04676	522.8	0.05315	522.8	0.04814	522.8	0.05509	522.8	0.05646	522.8	0.05022	522.8	0.05195
523	0.0407	523	0.03947	523	0.05399	523	0.04518	523	0.03957	523	0.04546	523	0.04773	523	0.05098	523	0.0465	523	0.05286	523	0.04792	523	0.0547	523	0.05553	523	0.04986	523	0.05185
523.2	0.04039	523.2	0.03925	523.2	0.05323	523.2	0.04493	523.2	0.03931	523.2	0.04536	523.2	0.04764	523.2	0.05066	523.2	0.04647	523.2	0.0525	523.2	0.04788	523.2	0.05453	523.2	0.05469	523.2	0.04942	523.2	0.0514
523.4	0.04025	523.4	0.03907	523.4	0.05252	523.4	0.04484	523.4	0.03897	523.4	0.04536	523.4	0.04764	523.4	0.05009	523.4	0.04641	523.4	0.05228	523.4	0.04751	523.4	0.05433	523.4	0.05455	523.4	0.0492	523.4	0.05108
523.6	0.04011	523.6	0.03894	523.6	0.05313	523.6	0.04448	523.6	0.03894	523.6	0.04499	523.6	0.04732	523.6	0.05	523.6	0.04638	523.6	0.05183	523.6	0.04696	523.6	0.05399	523.6	0.0545	523.6	0.04882	523.6	0.05046
523.8	0.03991	523.8	0.03867	523.8	0.05303	523.8	0.04418	523.8	0.03866	523.8	0.04458	523.8	0.04724	523.8	0.04972	523.8	0.04575	523.8	0.05147	523.8	0.04646	523.8	0.05322	523.8	0.05441	523.8	0.04848	523.8	0.05001
524	0.03985	524	0.03866	524	0.05247	524	0.04363	524	0.03798	524	0.04449	524	0.04693	524	0.04958	524	0.04531	524	0.05108	524	0.04614	524	0.05288	524	0.05367	524	0.0478	524	0.04942
524.2	0.03962	524.2	0.03859	524.2	0.05288	524.2	0.04353	524.2	0.03772	524.2	0.0441	524.2	0.04614	524.2	0.04917	524.2	0.04474	524.2	0.05079	524.2	0.04614	524.2	0.05249	524.2	0.05334	524.2	0.04743	524.2	0.04928
524.4	0.03959	524.4	0.03849	524.4	0.05232	524.4	0.04353	524.4	0.03752	524.4	0.04366	524.4	0.04614	524.4	0.04868	524.4	0.04412	524.4	0.05033	524.4	0.04564	524.4	0.05208	524.4	0.05325	524.4	0.04716	524.4	0.04924
524.6	0.03937	524.6	0.03846	524.6	0.05207	524.6	0.04331	524.6	0.03733	524.6	0.04343	524.6	0.04582	524.6	0.04864	524.6	0.04397	524.6	0.05003	524.6	0.0454	524.6	0.05181	524.6	0.05301	524.6	0.04653	524.6	0.04858
524.8	0.03897	524.8	0.03842	524.8	0.0507	524.8	0.04312	524.8	0.03723	524.8	0.04341	524.8	0.04582	524.8	0.04847	524.8	0.04388	524.8	0.04968	524.8	0.04487	524.8	0.05145	524.8	0.05278	524.8	0.04636	524.8	0.04768
525	0.03891	525	0.0384	525	0.05106	525	0.04308	525	0.03693	525	0.04334	525	0.04497	525	0.04819	525	0.04382	525	0.04932	525	0.0442	525	0.05119	525	0.05273	525	0.04623	525	0.04743
525.2	0.0385	525.2	0.03793	525.2	0.05056	525.2	0.04301	525.2	0.03691	525.2	0.04327	525.2	0.04496	525.2	0.04774	525.2	0.04379	525.2	0.04901	525.2	0.04411	525.2	0.05117	525.2	0.0519	525.2	0.04603	525.2	0.04688
525.4	0.03808	525.4	0.03788	525.4	0.04991	525.4	0.04265	525.4	0.03691	525.4	0.04318	525.4	0.04457	525.4	0.04717	525.4	0.04379	525.4	0.04865	525.4	0.04376	525.4	0.05102	525.4	0.05171	525.4	0.04567	525.4	0.04681
525.6	0.03762	525.6	0.03746	525.6	0.04985	525.6	0.04231	525.6	0.03684	525.6	0.04304	525.6	0.0441	525.6	0.04672	525.6	0.04307	525.6	0.04836	525.6	0.04335	525.6	0.0506	525.6	0.05148	525.6	0.0451	525.6	0.04649
525.8	0.03755	525.8	0.03706	525.8	0.04913	525.8	0.04216	525.8	0.03667	525.8	0.04301	525.8	0.04399	525.8	0.04648	525.8	0.04304	525.8	0.04795	525.8	0.043	525.8	0.05002	525.8	0.05064	525.8	0.04498	525.8	0.04594
526	0.03754	526	0.03669	526	0.04939	526	0.04189	526	0.03665	526	0.04235	526	0.04316	526	0.04625	526	0.04263	526	0.04765	526	0.0427	526	0.04949	526	0.05017	526	0.04477	526	0.04573
526.2	0.03725	526.2	0.03663	526.2	0.04877	526.2	0.04144	526.2	0.03657	526.2	0.04207	526.2	0.04287	526.2	0.04623	526.2	0.04236	526.2	0.04737	526.2	0.04263	526.2	0.04922	526.2	0.04994	526.2	0.04394	526.2	0.04524
526.4	0.03711	526.4	0.03652	526.4	0.0484	526.4	0.04134	526.4	0.03654	526.4	0.04168	526.4	0.0427	526.4	0.04591	526.4	0.04209	526.4	0.04698	526.4	0.04252	526.4	0.04888	526.4	0.04989	526.4	0.04366	526.4	0.04483
526.6	0.03702	526.6	0.03647	526.6	0.04853	526.6	0.04116	526.6	0.03615	526.6	0.04168	526.6	0.04226	526.6	0.0455	526.6	0.04162	526.6	0.04662	526.6	0.04191	526.6	0.04837	526.6	0.04901	526.6	0.04323	526.6	0.04437
526.8	0.03634	526.8	0.036	526.8	0.0494	526.8	0.04089	526.8	0.03595	526.8	0.04131	526.8	0.04171	526.8	0.0454	526.8	0.04102	526.8	0.04617	526.8	0.04172	526.8	0.04803	526.8	0.04831	526.8	0.04274	526.8	0.04378
527	0.03607	527	0.03579	527	0.0484	527	0.04082	527	0.03576	527	0.04117	527	0.04171	527	0.04486	527	0.04069	527	0.04589	527	0.04115	527	0.04758	527	0.04785	527	0.04217	527	0.04326
527.2	0.03607	527.2	0.03524	527.2	0.04766	527.2	0.04044	527.2	0.03556	527.2	0.04103	527.2	0.04147	527.2	0.04456	527.2	0.04052	527.2	0.04553	527.2	0.04048	527.2	0.04728	527.2	0.04691	527.2	0.04163	527.2	0.0426
527.4	0.03605	527.4	0.035	527.4	0.04666	527.4	0.04044	527.4	0.03528	527.4	0.04085	527.4	0.04137	527.4	0.04414	527.4	0.04022	527.4	0.04514	527.4	0.04031	527.4	0.04706	527.4	0.04677	527.4	0.04143	527.4	0.04246
527.6	0.03595	527.6	0.03496	527.6	0.04764	527.6	0.0404	527.6	0.03474	527.6	0.04066	527.6	0.04137	527.6	0.04371	527.6	0.03956	527.6	0.04479	527.6	0.03957	527.6	0.04651	527.6	0.04616	527.6	0.04089	527.6	0.04236
527.8	0.03593	527.8	0.03489	527.8	0.04738	527.8	0.04002	527.8	0.03425	527.8	0.04027	527.8	0.04132	527.8	0.04341	527.8	0.03941	527.8	0.04453	527.8	0.03926	527.8	0.04577	527.8	0.04615	527.8	0.04076	527.8	0.04218
528	0.03578	528	0.03469	528	0.04683	528	0.03985	528	0.0342	528	0.03963	528	0.04121	528	0.04282	528	0.03921	528	0.04404	528	0.03874	528	0.04535	528	0.04596	528	0.04046	528	0.04131
528.2	0.03561	528.2	0.03466	528.2	0.0459	528.2	0.03968	528.2	0.0342	528.2	0.03896	528.2	0.04106	528.2	0.04269	528.2	0.03867	528.2	0.04374	528.2	0.03843	528.2	0.04499	528.2	0.04556	528.2	0.04013	528.2	0.04051
528.4	0.03535	528.4	0.03439	528.4	0.04657	528.4	0.03957	528.4	0.03419	528.4	0.03891	528.4	0.04047	528.4	0.0422	528.4	0.03828	528.4	0.04331	528.4	0.03793	528.4	0.0446	528.4	0.04516	528.4	0.03947	528.4	0.04006
528.6	0.03533	528.6	0.03431	528.6	0.0463	528.6	0.03942	528.6	0.03419	528.6	0.03885	528.6	0.04035	528.6	0.04213	528.6	0.03802	528.6	0.04298	528.6	0.03737	528.6	0.04448	528.6	0.04478	528.6	0.03918	528.6	0.03985
528.8	0.03501	528.8	0.03428	528.8	0.04539	528.8	0.03906	528.8	0.03419	528.8	0.03868	528.8	0.03984	528.8	0.04201	528.8	0.03796	528.8	0.04243	528.8	0.03715	528.8	0.04426	528.8	0.04402	528.8	0.03899	528.8	0.03985
529	0.03492	529	0.03427	529	0.04499	529	0.03864	529	0.03412	529	0.03859	529	0.03923	529	0.04179	529	0.03778	529	0.04221	529	0.03672	529	0.04384	529	0.04376	529	0.03859	529	0.03982
529.2	0.03484	529.2	0.03424	529.2	0.04443	529.2	0.03808	529.2	0.03407	529.2	0.03855	529.2	0.0391	529.2	0.04162	529.2	0.03754	529.2	0.04178	529.2	0.03635	529.2	0.04369	529.2	0.04374	529.2	0.03804	529.2	0.03884
529.4	0.03479	529.4	0.03412	529.4	0.04375	529.4	0.03798	529.4	0.03295	529.4	0.03832	529.4	0.03872	529.4	0.04117	529.4	0.0373	529.4	0.04136	529.4	0.03598	529.4	0.04331	529.4	0.0434	529.4	0.03771	529.4	0.03829
529.6	0.0347	529.6	0.03394	529.6	0.04368	529.6	0.03796	529.6	0.03253	529.6	0.03799	529.6	0.03861	529.6	0.04083	529.6	0.037	529.6	0.04097	529.6	0.03556	529.6	0.04298	529.6	0.04291	529.6	0.03712	529.6	0.03752
529.8	0.03447	529.8	0.03377	529.8	0.04455	529.8	0.03779	529.8	0.03245	529.8	0.03772	529.8	0.03815	529.8	0.0407	529.8	0.03677	529.8	0.04054	529.8	0.03539	529.8	0.04257	529.8	0.04273	529.8	0.03679	529.8	0.03697
530	0.03442	530	0.03362	530	0.04465	530	0.0374	530	0.03226	530	0.03756	530	0.03758	530	0.03987	530	0.03671	530	0.0401	530	0.03493	530	0.04195	530	0.04217	530	0.03613	530	0.03641
530.2	0.03427	530.2	0.03334	530.2	0.04309	530.2	0.037	530.2	0.03193	530.2	0.03749	530.2	0.03709	530.2	0.03964	530.2	0.0362	530.2	0.03973	530.2	0.03463	530.2	0.04178	530.2	0.04205	530.2	0.03578	530.2	0.03592
530.4	0.034	530.4	0.0327	530.4	0.043	530.4	0.03681	530.4	0.03156	530.4	0.03707	530.4	0.03708	530.4	0.03911	530.4	0.03593	530.4	0.0393	530.4	0.0343	530.4	0.04175	530.4	0.0417	530.4	0.03526	530.4	0.03544
530.6	0.03384	530.6	0.03264	530.6	0.04364	530.6	0.0366	530.6	0.03086	530.6	0.03663	530.6	0.03645	530.6	0.03906	530.6	0.03543	530.6	0.03899	530.6	0.03384	530.6	0.04127	530.6	0.04168	530.6	0.03509	530.6	0.0354
530.8	0.03366	530.8	0.0326	530.8	0.0428	530.8	0.03657	530.8	0.03067	530.8	0.03599	530.8	0.03623	530.8	0.03874	530.8	0.03501	530.8	0.03856	530.8	0.03334	530.8	0.04073	530.8	0.04161	530.8	0.03475	530.8	0.03516
531	0.03333	531	0.03254	531	0.04206	531	0.03619	531	0.03051	531	0.0359	531	0.03611	531	0.03821	531	0.03474	531	0.03819	531	0.0331	531	0.04027	531	0.04154	531	0.03457	531	0.03478
531.2	0.03265	531.2	0.0325	531.2	0.0425	531.2	0.03583	531.2	0.03037	531.2	0.03551	531.2	0.03566	531.2	0.0377	531.2	0.03465	531.2	0.03772	531.2	0.03295	531.2	0.03982	531.2	0.04135	531.2	0.03404	531.2	0.03429
531.4	0.03265	531.4	0.03187	531.4	0.04106	531.4	0.03551	531.4	0.03028	531.4	0.03544	531.4	0.0355	531.4	0.03729	531.4	0.03424	531.4	0.03744	531.4	0.03249	531.4	0.03948	531.4	0.04079	531.4	0.03354	531.4	0.03403
531.6	0.03265	531.6	0.03138	531.6	0.04158	531.6	0.03543	531.6	0.03018	531.6	0.03447	531.6	0.03512	531.6	0.03697	531.6	0.0337	531.6	0.03702	531.6	0.03232	531.6	0.03897	531.6	0.04037	531.6	0.03328	531.6	0.03341
531.8	0.03264	531.8	0.03129	531.8	0.04124	531.8	0.03526	531.8	0.03016	531.8	0.03394	531.8	0.03424	531.8	0.03672	531.8	0.03334	531.8	0.03672	531.8	0.03193	531.8	0.03878	531.8	0.04033	531.8	0.03264	531.8	0.03319
532	0.03245	532	0.03112	532	0.04087	532	0.03509	532	0.02998	532	0.03371	532	0.0338	532	0.03627	532	0.0332	532	0.03628	532	0.03141	532	0.0383	532	0.03952	532	0.03236	532	0.03269
532.2	0.03238	532.2	0.03089	532.2	0.04074	532.2	0.03466	532.2	0.02897	532.2	0.03348	532.2	0.03346	532.2	0.03582	532.2	0.03305	532.2	0.03597	532.2	0.03119	532.2	0.03796	532.2	0.03889	532.2	0.03198	532.2	0.03221
532.4	0.03238	532.4	0.03081	532.4	0.03951	532.4	0.0343	532.4	0.02894	532.4	0.03332	532.4	0.03255	532.4	0.03518	532.4	0.03296	532.4	0.03549	532.4	0.03062	532.4	0.03751	532.4	0.03811	532.4	0.03194	532.4	0.0319
532.6	0.03219	532.6	0.03058	532.6	0.03992	532.6	0.03388	532.6	0.0287	532.6	0.03329	532.6	0.0325	532.6	0.03486	532.6	0.03263	532.6	0.03516	532.6	0.03023	532.6	0.03715	532.6	0.03808	532.6	0.03173	532.6	0.03169
532.8	0.03181	532.8	0.03026	532.8	0.04064	532.8	0.03388	532.8	0.02832	532.8	0.03327	532.8	0.0325	532.8	0.03456	532.8	0.03186	532.8	0.03477	532.8	0.0296	532.8	0.03664	532.8	0.03742	532.8	0.03113	532.8	0.03122
533	0.0316	533	0.03013	533	0.03927	533	0.03383	533	0.02761	533	0.03265	533	0.03242	533	0.03418	533	0.03108	533	0.03445	533	0.02921	533	0.03633	533	0.03728	533	0.03076	533	0.03094
533.2	0.03147	533.2	0.02978	533.2	0.03933	533.2	0.03354	533.2	0.02756	533.2	0.03226	533.2	0.03222	533.2	0.03371	533.2	0.0307	533.2	0.03404	533.2	0.02897	533.2	0.03607	533.2	0.03722	533.2	0.03	533.2	0.03059
533.4	0.03141	533.4	0.02964	533.4	0.03848	533.4	0.03349	533.4	0.02733	533.4	0.03198	533.4	0.03174	533.4	0.03339	533.4	0.0304	533.4	0.03367	533.4	0.02891	533.4	0.03586	533.4	0.03705	533.4	0.0298	533.4	0.0303
533.6	0.03103	533.6	0.02947	533.6	0.03835	533.6	0.03303	533.6	0.02696	533.6	0.03166	533.6	0.03151	533.6	0.03324	533.6	0.0301	533.6	0.03327	533.6	0.02854	533.6	0.03563	533.6	0.03667	533.6	0.02942	533.6	0.02983
533.8	0.0306	533.8	0.02936	533.8	0.03692	533.8	0.03301	533.8	0.02673	533.8	0.03127	533.8	0.03038	533.8	0.03316	533.8	0.03001	533.8	0.03295	533.8	0.0281	533.8	0.03534	533.8	0.03595	533.8	0.02904	533.8	0.02961
534	0.03055	534	0.02887	534	0.03753	534	0.03271	534	0.02663	534	0.03095	534	0.03002	534	0.03258	534	0.02968	534	0.03251	534	0.02775	534	0.03497	534	0.03574	534	0.029	534	0.02916
534.2	0.03001	534.2	0.02852	534.2	0.03743	534.2	0.03256	534.2	0.02619	534.2	0.03062	534.2	0.02993	534.2	0.0322	534.2	0.02912	534.2	0.03224	534.2	0.02758	534.2	0.03485	534.2	0.03572	534.2	0.02861	534.2	0.02886
534.4	0.02977	534.4	0.02789	534.4	0.03743	534.4	0.03183	534.4	0.02614	534.4	0.03039	534.4	0.02985	534.4	0.03198	534.4	0.02868	534.4	0.03187	534.4	0.02714	534.4	0.03434	534.4	0.03525	534.4	0.02812	534.4	0.02811
534.6	0.02977	534.6	0.02785	534.6	0.03702	534.6	0.03166	534.6	0.02567	534.6	0.03	534.6	0.02979	534.6	0.03141	534.6	0.02842	534.6	0.03159	534.6	0.02703	534.6	0.03406	534.6	0.0348	534.6	0.02769	534.6	0.02809
534.8	0.02948	534.8	0.02775	534.8	0.0367	534.8	0.0312	534.8	0.02508	534.8	0.02961	534.8	0.0295	534.8	0.03111	534.8	0.02802	534.8	0.0311	534.8	0.02677	534.8	0.03346	534.8	0.03447	534.8	0.02741	534.8	0.02728
535	0.02895	535	0.02732	535	0.03653	535	0.03084	535	0.02508	535	0.02915	535	0.02852	535	0.031	535	0.0275	535	0.03069	535	0.02643	535	0.03325	535	0.03434	535	0.02712	535	0.02715
535.2	0.02854	535.2	0.02706	535.2	0.03576	535.2	0.03035	535.2	0.02506	535.2	0.02915	535.2	0.02843	535.2	0.03053	535.2	0.02713	535.2	0.0303	535.2	0.02606	535.2	0.03296	535.2	0.03412	535.2	0.02654	535.2	0.02692
535.4	0.02796	535.4	0.02704	535.4	0.03455	535.4	0.02999	535.4	0.02505	535.4	0.0288	535.4	0.02807	535.4	0.03034	535.4	0.02671	535.4	0.0301	535.4	0.02579	535.4	0.03279	535.4	0.03369	535.4	0.0264	535.4	0.02677
535.6	0.02792	535.6	0.0266	535.6	0.03497	535.6	0.02997	535.6	0.02495	535.6	0.02878	535.6	0.02789	535.6	0.03028	535.6	0.02663	535.6	0.0297	535.6	0.02512	535.6	0.03238	535.6	0.03312	535.6	0.02589	535.6	0.02659
535.8	0.02779	535.8	0.02621	535.8	0.03477	535.8	0.02982	535.8	0.02462	535.8	0.02837	535.8	0.02774	535.8	0.02998	535.8	0.02628	535.8	0.02946	535.8	0.0249	535.8	0.03187	535.8	0.03283	535.8	0.02582	535.8	0.02653
536	0.02778	536	0.02612	536	0.03397	536	0.02956	536	0.02405	536	0.02781	536	0.02701	536	0.0294	536	0.02616	536	0.02914	536	0.02488	536	0.03147	536	0.03269	536	0.02532	536	0.02613
536.2	0.02749	536.2	0.02582	536.2	0.03418	536.2	0.02948	536.2	0.0237	536.2	0.02751	536.2	0.02675	536.2	0.02938	536.2	0.02587	536.2	0.0289	536.2	0.02447	536.2	0.03116	536.2	0.03269	536.2	0.02518	536.2	0.02585
536.4	0.02722	536.4	0.0257	536.4	0.03298	536.4	0.02924	536.4	0.0237	536.4	0.02712	536.4	0.02673	536.4	0.02853	536.4	0.02557	536.4	0.02847	536.4	0.02405	536.4	0.03066	536.4	0.03255	536.4	0.02487	536.4	0.02537
536.6	0.02684	536.6	0.02562	536.6	0.03321	536.6	0.02888	536.6	0.02354	536.6	0.02696	536.6	0.02582	536.6	0.02806	536.6	0.02538	536.6	0.02812	536.6	0.02366	536.6	0.03042	536.6	0.03192	536.6	0.02456	536.6	0.02492
536.8	0.02625	536.8	0.02562	536.8	0.03213	536.8	0.02841	536.8	0.02323	536.8	0.02638	536.8	0.02535	536.8	0.02746	536.8	0.02502	536.8	0.02774	536.8	0.02362	536.8	0.03023	536.8	0.03133	536.8	0.02418	536.8	0.02458
537	0.02602	537	0.02526	537	0.03175	537	0.02773	537	0.02291	537	0.02627	537	0.02518	537	0.0274	537	0.02472	537	0.02745	537	0.02353	537	0.02972	537	0.03125	537	0.02405	537	0.02427
537.2	0.02576	537.2	0.02464	537.2	0.03236	537.2	0.02752	537.2	0.02269	537.2	0.02613	537.2	0.02505	537.2	0.02719	537.2	0.02467	537.2	0.02707	537.2	0.02318	537.2	0.02928	537.2	0.03107	537.2	0.02369	537.2	0.0242
537.4	0.02535	537.4	0.02427	537.4	0.03189	537.4	0.02744	537.4	0.02222	537.4	0.02592	537.4	0.02483	537.4	0.02714	537.4	0.0243	537.4	0.02675	537.4	0.02292	537.4	0.02891	537.4	0.03054	537.4	0.02346	537.4	0.02406
537.6	0.02529	537.6	0.02345	537.6	0.03088	537.6	0.02725	537.6	0.02221	537.6	0.02586	537.6	0.02467	537.6	0.02695	537.6	0.0239	537.6	0.02641	537.6	0.02266	537.6	0.02864	537.6	0.03016	537.6	0.02324	537.6	0.0234
537.8	0.02504	537.8	0.02344	537.8	0.03102	537.8	0.02695	537.8	0.02157	537.8	0.0251	537.8	0.02456	537.8	0.02655	537.8	0.0237	537.8	0.02613	537.8	0.02255	537.8	0.02855	537.8	0.02992	537.8	0.02274	537.8	0.02317
538	0.02484	538	0.02317	538	0.03047	538	0.02671	538	0.02154	538	0.02461	538	0.02427	538	0.02612	538	0.02369	538	0.02576	538	0.02199	538	0.02816	538	0.02982	538	0.02243	538	0.02303
538.2	0.02484	538.2	0.02307	538.2	0.03053	538.2	0.02656	538.2	0.02148	538.2	0.02399	538.2	0.0241	538.2	0.02561	538.2	0.02354	538.2	0.02548	538.2	0.02179	538.2	0.02788	538.2	0.02967	538.2	0.02235	538.2	0.02246
538.4	0.02472	538.4	0.02288	538.4	0.02978	538.4	0.02612	538.4	0.02122	538.4	0.02355	538.4	0.02393	538.4	0.02522	538.4	0.02314	538.4	0.02513	538.4	0.02142	538.4	0.0275	538.4	0.02957	538.4	0.02211	538.4	0.02233
538.6	0.02417	538.6	0.02275	538.6	0.02988	538.6	0.02574	538.6	0.02074	538.6	0.02309	538.6	0.02355	538.6	0.02471	538.6	0.02288	538.6	0.02485	538.6	0.02105	538.6	0.02717	538.6	0.02952	538.6	0.02183	538.6	0.02208
538.8	0.02404	538.8	0.0226	538.8	0.02931	538.8	0.02548	538.8	0.02061	538.8	0.02296	538.8	0.02326	538.8	0.02465	538.8	0.02268	538.8	0.02454	538.8	0.02078	538.8	0.02685	538.8	0.02933	538.8	0.02132	538.8	0.02174
539	0.02367	539	0.02248	539	0.0294	539	0.02506	539	0.02026	539	0.0229	539	0.02305	539	0.02437	539	0.02239	539	0.02431	539	0.02062	539	0.02656	539	0.02851	539	0.0209	539	0.02159
539.2	0.02299	539.2	0.02232	539.2	0.02906	539.2	0.02487	539.2	0.02005	539.2	0.02268	539.2	0.02192	539.2	0.02416	539.2	0.02205	539.2	0.024	539.2	0.02022	539.2	0.02624	539.2	0.02819	539.2	0.02065	539.2	0.02135
539.4	0.02251	539.4	0.02224	539.4	0.02903	539.4	0.02446	539.4	0.02005	539.4	0.02243	539.4	0.02165	539.4	0.02371	539.4	0.02187	539.4	0.02374	539.4	0.01991	539.4	0.02604	539.4	0.02773	539.4	0.02056	539.4	0.0213
539.6	0.02221	539.6	0.0222	539.6	0.02867	539.6	0.02423	539.6	0.01989	539.6	0.02213	539.6	0.02125	539.6	0.0235	539.6	0.02147	539.6	0.02339	539.6	0.01965	539.6	0.02564	539.6	0.02748	539.6	0.02023	539.6	0.02121
539.8	0.02192	539.8	0.02194	539.8	0.02749	539.8	0.02393	539.8	0.01962	539.8	0.02204	539.8	0.021	539.8	0.02328	539.8	0.02124	539.8	0.02307	539.8	0.01936	539.8	0.02557	539.8	0.02712	539.8	0.0202	539.8	0.02103
540	0.02188	540	0.02181	540	0.02854	540	0.02355	540	0.01892	540	0.02177	540	0.02085	540	0.02305	540	0.02075	540	0.02276	540	0.01927	540	0.025	540	0.02702	540	0.01983	540	0.02067
540.2	0.02183	540.2	0.02156	540.2	0.02729	540.2	0.02323	540.2	0.01864	540.2	0.02176	540.2	0.02073	540.2	0.02275	540.2	0.02049	540.2	0.02253	540.2	0.01917	540.2	0.02499	540.2	0.02656	540.2	0.01965	540.2	0.02028
540.4	0.0218	540.4	0.02131	540.4	0.02689	540.4	0.02299	540.4	0.01817	540.4	0.02164	540.4	0.02067	540.4	0.02262	540.4	0.02029	540.4	0.02227	540.4	0.01879	540.4	0.02457	540.4	0.02621	540.4	0.01949	540.4	0.01988
540.6	0.02145	540.6	0.02096	540.6	0.02707	540.6	0.02266	540.6	0.01807	540.6	0.02139	540.6	0.02046	540.6	0.02241	540.6	0.02008	540.6	0.02208	540.6	0.01868	540.6	0.02419	540.6	0.02608	540.6	0.01921	540.6	0.0196
540.8	0.02118	540.8	0.02094	540.8	0.02639	540.8	0.02215	540.8	0.01797	540.8	0.02109	540.8	0.02035	540.8	0.02211	540.8	0.01969	540.8	0.02176	540.8	0.01838	540.8	0.02386	540.8	0.02598	540.8	0.019	540.8	0.01949
541	0.021	541	0.02039	541	0.02525	541	0.0218	541	0.01794	541	0.02084	541	0.02004	541	0.02179	541	0.0194	541	0.02156	541	0.01812	541	0.02379	541	0.02586	541	0.01889	541	0.01921
541.2	0.021	541.2	0.02023	541.2	0.02482	541.2	0.02159	541.2	0.01769	541.2	0.02027	541.2	0.01945	541.2	0.02136	541.2	0.01937	541.2	0.02123	541.2	0.01789	541.2	0.02338	541.2	0.02563	541.2	0.01852	541.2	0.01887
541.4	0.02073	541.4	0.02022	541.4	0.02601	541.4	0.02136	541.4	0.01713	541.4	0.02021	541.4	0.01929	541.4	0.0209	541.4	0.01935	541.4	0.02093	541.4	0.01745	541.4	0.02311	541.4	0.02557	541.4	0.01834	541.4	0.01853
541.6	0.02057	541.6	0.01978	541.6	0.02527	541.6	0.02112	541.6	0.01705	541.6	0.01993	541.6	0.0191	541.6	0.0206	541.6	0.01912	541.6	0.02063	541.6	0.01742	541.6	0.02278	541.6	0.02517	541.6	0.01798	541.6	0.01841
541.8	0.02045	541.8	0.0192	541.8	0.02548	541.8	0.02087	541.8	0.01665	541.8	0.01953	541.8	0.01905	541.8	0.02019	541.8	0.01861	541.8	0.02045	541.8	0.01724	541.8	0.02262	541.8	0.0251	541.8	0.01768	541.8	0.01839
542	0.01981	542	0.01908	542	0.02463	542	0.02057	542	0.01636	542	0.019	542	0.01861	542	0.02008	542	0.01843	542	0.02017	542	0.01701	542	0.02244	542	0.02476	542	0.01743	542	0.01825
542.2	0.01962	542.2	0.0189	542.2	0.02435	542.2	0.02057	542.2	0.01593	542.2	0.01878	542.2	0.01841	542.2	0.01976	542.2	0.01839	542.2	0.01994	542.2	0.01699	542.2	0.02212	542.2	0.02469	542.2	0.01733	542.2	0.01763
542.4	0.01941	542.4	0.01823	542.4	0.02357	542.4	0.02013	542.4	0.01587	542.4	0.01842	542.4	0.01826	542.4	0.01939	542.4	0.01785	542.4	0.0197	542.4	0.01691	542.4	0.02193	542.4	0.02397	542.4	0.01708	542.4	0.01749
542.6	0.01905	542.6	0.01808	542.6	0.02356	542.6	0.01993	542.6	0.01586	542.6	0.01819	542.6	0.01818	542.6	0.0192	542.6	0.01773	542.6	0.01952	542.6	0.01681	542.6	0.02165	542.6	0.02368	542.6	0.01698	542.6	0.0172
542.8	0.01903	542.8	0.01788	542.8	0.02258	542.8	0.01944	542.8	0.01576	542.8	0.01802	542.8	0.01808	542.8	0.01888	542.8	0.01736	542.8	0.01926	542.8	0.01627	542.8	0.02146	542.8	0.02358	542.8	0.01689	542.8	0.01682
543	0.01849	543	0.01764	543	0.0234	543	0.01919	543	0.01567	543	0.01788	543	0.01745	543	0.01886	543	0.01706	543	0.01901	543	0.01626	543	0.02111	543	0.02332	543	0.01646	543	0.01664
543.2	0.01824	543.2	0.01753	543.2	0.02213	543.2	0.019	543.2	0.01554	543.2	0.01782	543.2	0.01743	543.2	0.01841	543.2	0.01702	543.2	0.01871	543.2	0.0159	543.2	0.02086	543.2	0.02271	543.2	0.01626	543.2	0.01659
543.4	0.01801	543.4	0.0171	543.4	0.0222	543.4	0.01898	543.4	0.01539	543.4	0.0177	543.4	0.0167	543.4	0.01817	543.4	0.01699	543.4	0.0185	543.4	0.01551	543.4	0.02067	543.4	0.02247	543.4	0.01605	543.4	0.01635
543.6	0.01797	543.6	0.01707	543.6	0.02216	543.6	0.01885	543.6	0.01499	543.6	0.01748	543.6	0.01659	543.6	0.01793	543.6	0.01648	543.6	0.01826	543.6	0.01508	543.6	0.02037	543.6	0.02235	543.6	0.01604	543.6	0.01604
543.8	0.01766	543.8	0.01692	543.8	0.02187	543.8	0.01847	543.8	0.01489	543.8	0.01723	543.8	0.0165	543.8	0.01782	543.8	0.01636	543.8	0.01806	543.8	0.01492	543.8	0.02005	543.8	0.02202	543.8	0.01584	543.8	0.016
544	0.01758	544	0.01648	544	0.02126	544	0.0182	544	0.01485	544	0.01721	544	0.0163	544	0.01768	544	0.01612	544	0.01782	544	0.0148	544	0.01979	544	0.02195	544	0.01564	544	0.01575
544.2	0.01734	544.2	0.0163	544.2	0.02097	544.2	0.01801	544.2	0.01484	544.2	0.01687	544.2	0.01624	544.2	0.01748	544.2	0.01593	544.2	0.01764	544.2	0.01466	544.2	0.01954	544.2	0.02147	544.2	0.01553	544.2	0.01573
544.4	0.01683	544.4	0.01622	544.4	0.02071	544.4	0.01775	544.4	0.01469	544.4	0.01683	544.4	0.0161	544.4	0.01717	544.4	0.01571	544.4	0.01739	544.4	0.01463	544.4	0.01924	544.4	0.02121	544.4	0.01533	544.4	0.01564
544.6	0.01673	544.6	0.01614	544.6	0.02093	544.6	0.01753	544.6	0.01402	544.6	0.01658	544.6	0.016	544.6	0.01696	544.6	0.01532	544.6	0.01717	544.6	0.01447	544.6	0.0192	544.6	0.02098	544.6	0.01529	544.6	0.01539
544.8	0.01646	544.8	0.0161	544.8	0.02044	544.8	0.01753	544.8	0.01384	544.8	0.01645	544.8	0.01546	544.8	0.01678	544.8	0.01527	544.8	0.01695	544.8	0.01428	544.8	0.01888	544.8	0.02095	544.8	0.01502	544.8	0.01532
545	0.01645	545	0.01564	545	0.02012	545	0.01724	545	0.01384	545	0.01607	545	0.0152	545	0.01658	545	0.01517	545	0.01671	545	0.01425	545	0.01856	545	0.0207	545	0.01469	545	0.01532
545.2	0.01637	545.2	0.01546	545.2	0.01966	545.2	0.01699	545.2	0.01374	545.2	0.01552	545.2	0.01468	545.2	0.01643	545.2	0.01445	545.2	0.01646	545.2	0.0142	545.2	0.01838	545.2	0.02013	545.2	0.01445	545.2	0.01524
545.4	0.01615	545.4	0.01534	545.4	0.01997	545.4	0.01666	545.4	0.01374	545.4	0.01545	545.4	0.01442	545.4	0.01623	545.4	0.01427	545.4	0.0163	545.4	0.01404	545.4	0.01837	545.4	0.02012	545.4	0.01432	545.4	0.01515
545.6	0.01605	545.6	0.01511	545.6	0.01927	545.6	0.01631	545.6	0.01343	545.6	0.01533	545.6	0.01441	545.6	0.01582	545.6	0.01408	545.6	0.01608	545.6	0.0138	545.6	0.0182	545.6	0.02004	545.6	0.01405	545.6	0.01493
545.8	0.01542	545.8	0.0151	545.8	0.01921	545.8	0.01611	545.8	0.01336	545.8	0.01502	545.8	0.01436	545.8	0.01568	545.8	0.01397	545.8	0.01587	545.8	0.01367	545.8	0.01798	545.8	0.01978	545.8	0.01386	545.8	0.01478
546	0.01532	546	0.01507	546	0.01933	546	0.01608	546	0.01336	546	0.0147	546	0.01431	546	0.01562	546	0.01392	546	0.01569	546	0.01363	546	0.0176	546	0.01898	546	0.0138	546	0.01447
546.2	0.01531	546.2	0.01492	546.2	0.01897	546.2	0.01603	546.2	0.01298	546.2	0.01468	546.2	0.01405	546.2	0.0153	546.2	0.01391	546.2	0.01548	546.2	0.01361	546.2	0.01744	546.2	0.01898	546.2	0.01369	546.2	0.01442
546.4	0.0151	546.4	0.01445	546.4	0.01925	546.4	0.01589	546.4	0.01283	546.4	0.0144	546.4	0.01396	546.4	0.01505	546.4	0.01359	546.4	0.01529	546.4	0.0134	546.4	0.01731	546.4	0.01875	546.4	0.01365	546.4	0.01422
546.6	0.01504	546.6	0.01434	546.6	0.0184	546.6	0.01574	546.6	0.01283	546.6	0.01409	546.6	0.01395	546.6	0.01499	546.6	0.01344	546.6	0.01513	546.6	0.01308	546.6	0.01705	546.6	0.0187	546.6	0.01348	546.6	0.01417
546.8	0.01476	546.8	0.01399	546.8	0.01743	546.8	0.01533	546.8	0.01221	546.8	0.01408	546.8	0.01394	546.8	0.01499	546.8	0.01324	546.8	0.01495	546.8	0.01276	546.8	0.01687	546.8	0.0186	546.8	0.01328	546.8	0.01394
547	0.0145	547	0.01386	547	0.01775	547	0.01507	547	0.01198	547	0.01407	547	0.01335	547	0.01474	547	0.01307	547	0.01478	547	0.01246	547	0.0167	547	0.01826	547	0.013	547	0.01378
547.2	0.01434	547.2	0.01384	547.2	0.0176	547.2	0.01482	547.2	0.01192	547.2	0.01374	547.2	0.01334	547.2	0.01441	547.2	0.01294	547.2	0.01455	547.2	0.01234	547.2	0.01626	547.2	0.01787	547.2	0.01284	547.2	0.01344
547.4	0.01416	547.4	0.01367	547.4	0.01755	547.4	0.01467	547.4	0.01188	547.4	0.01343	547.4	0.01327	547.4	0.01409	547.4	0.01285	547.4	0.01441	547.4	0.01224	547.4	0.01606	547.4	0.01775	547.4	0.01271	547.4	0.01302
547.6	0.01408	547.6	0.01357	547.6	0.01724	547.6	0.01447	547.6	0.01145	547.6	0.0133	547.6	0.01309	547.6	0.01388	547.6	0.01279	547.6	0.01424	547.6	0.01209	547.6	0.01579	547.6	0.01751	547.6	0.01259	547.6	0.01292
547.8	0.01397	547.8	0.01328	547.8	0.01648	547.8	0.01438	547.8	0.01145	547.8	0.01318	547.8	0.01282	547.8	0.01371	547.8	0.01264	547.8	0.01412	547.8	0.01183	547.8	0.01578	547.8	0.01743	547.8	0.01252	547.8	0.0129
548	0.01376	548	0.01297	548	0.01622	548	0.01435	548	0.01128	548	0.01313	548	0.01276	548	0.01356	548	0.0124	548	0.01398	548	0.0118	548	0.01562	548	0.01714	548	0.01248	548	0.01282
548.2	0.01365	548.2	0.0128	548.2	0.01644	548.2	0.01429	548.2	0.01121	548.2	0.01301	548.2	0.0127	548.2	0.0135	548.2	0.01227	548.2	0.01383	548.2	0.01175	548.2	0.0155	548.2	0.0169	548.2	0.01242	548.2	0.0128
548.4	0.01337	548.4	0.01271	548.4	0.01633	548.4	0.01413	548.4	0.01118	548.4	0.01285	548.4	0.01226	548.4	0.01331	548.4	0.01206	548.4	0.01365	548.4	0.01175	548.4	0.01517	548.4	0.01682	548.4	0.01215	548.4	0.01276
548.6	0.01334	548.6	0.01247	548.6	0.01625	548.6	0.01383	548.6	0.01102	548.6	0.01269	548.6	0.01226	548.6	0.01304	548.6	0.01201	548.6	0.0135	548.6	0.01173	548.6	0.0151	548.6	0.01644	548.6	0.01195	548.6	0.01272
548.8	0.01271	548.8	0.01213	548.8	0.01604	548.8	0.01349	548.8	0.0108	548.8	0.01247	548.8	0.01208	548.8	0.01299	548.8	0.0118	548.8	0.01335	548.8	0.01163	548.8	0.01505	548.8	0.01618	548.8	0.01184	548.8	0.01254
549	0.01246	549	0.01196	549	0.01557	549	0.01324	549	0.01076	549	0.01229	549	0.01187	549	0.01289	549	0.01166	549	0.01324	549	0.01144	549	0.01498	549	0.01613	549	0.01172	549	0.01234
549.2	0.01244	549.2	0.01184	549.2	0.01519	549.2	0.01305	549.2	0.01073	549.2	0.01193	549.2	0.0115	549.2	0.01268	549.2	0.01158	549.2	0.01304	549.2	0.01123	549.2	0.01464	549.2	0.01605	549.2	0.01163	549.2	0.01212
549.4	0.01238	549.4	0.01182	549.4	0.01541	549.4	0.01305	549.4	0.0106	549.4	0.01176	549.4	0.01144	549.4	0.01261	549.4	0.01142	549.4	0.01296	549.4	0.01115	549.4	0.01442	549.4	0.01585	549.4	0.01154	549.4	0.01212
549.6	0.0122	549.6	0.01173	549.6	0.01486	549.6	0.01285	549.6	0.01014	549.6	0.01166	549.6	0.01136	549.6	0.01245	549.6	0.01138	549.6	0.01275	549.6	0.01089	549.6	0.01432	549.6	0.01542	549.6	0.01148	549.6	0.01212
549.8	0.01216	549.8	0.01154	549.8	0.01552	549.8	0.01277	549.8	0.01	549.8	0.01166	549.8	0.01129	549.8	0.01222	549.8	0.01136	549.8	0.01263	549.8	0.01059	549.8	0.0143	549.8	0.01534	549.8	0.01143	549.8	0.01198
550	0.01189	550	0.01145	550	0.01491	550	0.01273	550	0.00976	550	0.01158	550	0.01115	550	0.01215	550	0.01132	550	0.01247	550	0.01042	550	0.01394	550	0.01524	550	0.01114	550	0.01193
550.2	0.01175	550.2	0.01141	550.2	0.01502	550.2	0.01258	550.2	0.00974	550.2	0.01138	550.2	0.01111	550.2	0.01208	550.2	0.01118	550.2	0.01235	550.2	0.01031	550.2	0.01377	550.2	0.01522	550.2	0.01103	550.2	0.01176
550.4	0.01139	550.4	0.01137	550.4	0.0149	550.4	0.01231	550.4	0.00971	550.4	0.0112	550.4	0.01111	550.4	0.01189	550.4	0.01097	550.4	0.01222	550.4	0.01027	550.4	0.01369	550.4	0.01484	550.4	0.01096	550.4	0.01162
550.6	0.01138	550.6	0.01134	550.6	0.01444	550.6	0.01223	550.6	0.00961	550.6	0.01083	550.6	0.01082	550.6	0.01185	550.6	0.01088	550.6	0.01211	550.6	0.01026	550.6	0.01352	550.6	0.01468	550.6	0.01093	550.6	0.01156
550.8	0.01089	550.8	0.01095	550.8	0.01431	550.8	0.01197	550.8	0.00914	550.8	0.01074	550.8	0.01077	550.8	0.01173	550.8	0.01065	550.8	0.012	550.8	0.0101	550.8	0.01326	550.8	0.01461	550.8	0.0108	550.8	0.01149
551	0.01082	551	0.01085	551	0.01403	551	0.01184	551	0.00884	551	0.01056	551	0.01065	551	0.01151	551	0.01041	551	0.01189	551	0.01002	551	0.0132	551	0.01433	551	0.01076	551	0.01144
551.2	0.01081	551.2	0.01085	551.2	0.01393	551.2	0.01168	551.2	0.00884	551.2	0.01055	551.2	0.01064	551.2	0.01149	551.2	0.01021	551.2	0.01176	551.2	0.01001	551.2	0.0129	551.2	0.0141	551.2	0.01056	551.2	0.01138
551.4	0.0108	551.4	0.01075	551.4	0.01374	551.4	0.01155	551.4	0.00884	551.4	0.01053	551.4	0.01055	551.4	0.01131	551.4	0.01014	551.4	0.01159	551.4	0.00995	551.4	0.01277	551.4	0.01398	551.4	0.01041	551.4	0.01134
551.6	0.01074	551.6	0.0106	551.6	0.01326	551.6	0.0114	551.6	0.00882	551.6	0.01036	551.6	0.01012	551.6	0.01115	551.6	0.01006	551.6	0.01143	551.6	0.00987	551.6	0.01272	551.6	0.01397	551.6	0.01036	551.6	0.01132
551.8	0.01068	551.8	0.0104	551.8	0.01337	551.8	0.01128	551.8	0.00882	551.8	0.01019	551.8	0.00994	551.8	0.01105	551.8	0.01005	551.8	0.01133	551.8	0.00973	551.8	0.01244	551.8	0.01384	551.8	0.01027	551.8	0.01124
552	0.01034	552	0.00996	552	0.0131	552	0.01099	552	0.00882	552	0.01014	552	0.00962	552	0.01096	552	0.00995	552	0.01117	552	0.00963	552	0.01244	552	0.01363	552	0.01025	552	0.011
552.2	0.00979	552.2	0.00988	552.2	0.01262	552.2	0.0107	552.2	0.0088	552.2	0.01008	552.2	0.0096	552.2	0.0109	552.2	0.00995	552.2	0.0111	552.2	0.00958	552.2	0.01228	552.2	0.01338	552.2	0.01004	552.2	0.01099
552.4	0.00973	552.4	0.00979	552.4	0.01278	552.4	0.01058	552.4	0.00839	552.4	0.00998	552.4	0.00941	552.4	0.01089	552.4	0.0096	552.4	0.01092	552.4	0.00946	552.4	0.01209	552.4	0.01299	552.4	0.00988	552.4	0.01092
552.6	0.00972	552.6	0.00977	552.6	0.01256	552.6	0.01042	552.6	0.00834	552.6	0.0098	552.6	0.00941	552.6	0.01076	552.6	0.00948	552.6	0.0108	552.6	0.00941	552.6	0.01195	552.6	0.01281	552.6	0.00985	552.6	0.01068
552.8	0.00954	552.8	0.00939	552.8	0.01184	552.8	0.01018	552.8	0.00822	552.8	0.00971	552.8	0.00941	552.8	0.01043	552.8	0.00943	552.8	0.01069	552.8	0.00938	552.8	0.01189	552.8	0.01263	552.8	0.00977	552.8	0.0103
553	0.00949	553	0.00935	553	0.0123	553	0.01009	553	0.00818	553	0.00955	553	0.00941	553	0.01034	553	0.0093	553	0.01062	553	0.00921	553	0.01161	553	0.01237	553	0.00963	553	0.01028
553.2	0.00931	553.2	0.00933	553.2	0.0124	553.2	0.0099	553.2	0.00783	553.2	0.00941	553.2	0.00941	553.2	0.01015	553.2	0.00922	553.2	0.01049	553.2	0.00919	553.2	0.01155	553.2	0.0123	553.2	0.00955	553.2	0.0102
553.4	0.00908	553.4	0.00929	553.4	0.01211	553.4	0.00981	553.4	0.00778	553.4	0.00937	553.4	0.00942	553.4	0.01013	553.4	0.00893	553.4	0.0104	553.4	0.00914	553.4	0.01143	553.4	0.01225	553.4	0.00945	553.4	0.0101
553.6	0.00895	553.6	0.00907	553.6	0.01201	553.6	0.00968	553.6	0.00773	553.6	0.00934	553.6	0.00942	553.6	0.01007	553.6	0.00891	553.6	0.01028	553.6	0.00891	553.6	0.01126	553.6	0.01225	553.6	0.00945	553.6	0.01004
553.8	0.00891	553.8	0.00904	553.8	0.01213	553.8	0.00959	553.8	0.00764	553.8	0.00925	553.8	0.00942	553.8	0.01004	553.8	0.0088	553.8	0.01021	553.8	0.00885	553.8	0.01121	553.8	0.01206	553.8	0.00933	553.8	0.01001
554	0.00891	554	0.00889	554	0.01139	554	0.00958	554	0.0073	554	0.00903	554	0.00942	554	0.01002	554	0.00878	554	0.01009	554	0.00879	554	0.01096	554	0.01181	554	0.00921	554	0.00997
554.2	0.0089	554.2	0.00881	554.2	0.01103	554.2	0.00933	554.2	0.00725	554.2	0.00901	554.2	0.00929	554.2	0.00995	554.2	0.00858	554.2	0.01002	554.2	0.00876	554.2	0.01093	554.2	0.01163	554.2	0.00916	554.2	0.00994
554.4	0.00887	554.4	0.00875	554.4	0.01103	554.4	0.00924	554.4	0.00704	554.4	0.00899	554.4	0.00891	554.4	0.00979	554.4	0.00857	554.4	0.00987	554.4	0.00876	554.4	0.0109	554.4	0.01161	554.4	0.00915	554.4	0.00994
554.6	0.00862	554.6	0.00843	554.6	0.01097	554.6	0.00916	554.6	0.00699	554.6	0.00887	554.6	0.00884	554.6	0.00966	554.6	0.00849	554.6	0.00974	554.6	0.00865	554.6	0.01062	554.6	0.01158	554.6	0.00904	554.6	0.00988
554.8	0.00852	554.8	0.00815	554.8	0.01112	554.8	0.00886	554.8	0.00697	554.8	0.00881	554.8	0.00855	554.8	0.00937	554.8	0.00846	554.8	0.00962	554.8	0.00849	554.8	0.01061	554.8	0.01134	554.8	0.0089	554.8	0.00974
555	0.00844	555	0.00808	555	0.01104	555	0.00882	555	0.00697	555	0.00873	555	0.00842	555	0.00933	555	0.0084	555	0.00958	555	0.00839	555	0.01047	555	0.01127	555	0.00882	555	0.00959
555.2	0.00828	555.2	0.00791	555.2	0.01078	555.2	0.00881	555.2	0.00697	555.2	0.00843	555.2	0.00842	555.2	0.00925	555.2	0.00832	555.2	0.00951	555.2	0.00835	555.2	0.01028	555.2	0.0112	555.2	0.00878	555.2	0.00943
555.4	0.00821	555.4	0.00763	555.4	0.01064	555.4	0.00876	555.4	0.00697	555.4	0.00825	555.4	0.00842	555.4	0.0092	555.4	0.00817	555.4	0.00941	555.4	0.00829	555.4	0.01016	555.4	0.0112	555.4	0.0087	555.4	0.00927
555.6	0.00806	555.6	0.00761	555.6	0.01033	555.6	0.00869	555.6	0.00697	555.6	0.00821	555.6	0.00842	555.6	0.00904	555.6	0.00805	555.6	0.00926	555.6	0.00824	555.6	0.01006	555.6	0.01112	555.6	0.00864	555.6	0.00924
555.8	0.00799	555.8	0.00751	555.8	0.00998	555.8	0.00856	555.8	0.00697	555.8	0.0082	555.8	0.00828	555.8	0.00896	555.8	0.00802	555.8	0.00921	555.8	0.00811	555.8	0.00999	555.8	0.01105	555.8	0.00858	555.8	0.00894
556	0.00793	556	0.0075	556	0.01023	556	0.00844	556	0.00697	556	0.00801	556	0.00828	556	0.00892	556	0.00795	556	0.00908	556	0.00809	556	0.00997	556	0.01091	556	0.00856	556	0.00888
556.2	0.00778	556.2	0.00745	556.2	0.01033	556.2	0.00841	556.2	0.00697	556.2	0.00787	556.2	0.00828	556.2	0.00892	556.2	0.00786	556.2	0.009	556.2	0.0079	556.2	0.00987	556.2	0.01075	556.2	0.00849	556.2	0.00885
556.4	0.00771	556.4	0.00741	556.4	0.00974	556.4	0.00827	556.4	0.00661	556.4	0.00785	556.4	0.00828	556.4	0.00884	556.4	0.00777	556.4	0.0089	556.4	0.00789	556.4	0.00972	556.4	0.01047	556.4	0.00847	556.4	0.00872
556.6	0.00759	556.6	0.00738	556.6	0.00977	556.6	0.00826	556.6	0.00648	556.6	0.0078	556.6	0.00825	556.6	0.0087	556.6	0.00768	556.6	0.00881	556.6	0.00788	556.6	0.00957	556.6	0.01041	556.6	0.00838	556.6	0.00868
556.8	0.00751	556.8	0.00727	556.8	0.00954	556.8	0.008	556.8	0.00638	556.8	0.00769	556.8	0.00813	556.8	0.00869	556.8	0.00767	556.8	0.00873	556.8	0.00785	556.8	0.00941	556.8	0.01021	556.8	0.00831	556.8	0.00862
557	0.00747	557	0.00713	557	0.00936	557	0.00787	557	0.00633	557	0.00759	557	0.00794	557	0.00852	557	0.00744	557	0.00869	557	0.00783	557	0.00929	557	0.01018	557	0.00825	557	0.00847
557.2	0.00744	557.2	0.00698	557.2	0.00943	557.2	0.00769	557.2	0.00628	557.2	0.00754	557.2	0.00759	557.2	0.00834	557.2	0.0074	557.2	0.0086	557.2	0.00778	557.2	0.00921	557.2	0.00983	557.2	0.00816	557.2	0.00843
557.4	0.00738	557.4	0.00684	557.4	0.00962	557.4	0.00753	557.4	0.00613	557.4	0.00732	557.4	0.00757	557.4	0.00828	557.4	0.00739	557.4	0.00849	557.4	0.00768	557.4	0.00919	557.4	0.00967	557.4	0.00797	557.4	0.00841
557.6	0.00716	557.6	0.00676	557.6	0.00901	557.6	0.00749	557.6	0.00602	557.6	0.00728	557.6	0.00756	557.6	0.0081	557.6	0.00735	557.6	0.00839	557.6	0.00751	557.6	0.00907	557.6	0.00963	557.6	0.00795	557.6	0.00835
557.8	0.00712	557.8	0.00667	557.8	0.00922	557.8	0.00747	557.8	0.00601	557.8	0.00711	557.8	0.00756	557.8	0.00804	557.8	0.0073	557.8	0.00834	557.8	0.00747	557.8	0.00906	557.8	0.00959	557.8	0.00788	557.8	0.00835
558	0.007	558	0.00665	558	0.00893	558	0.00747	558	0.00601	558	0.00709	558	0.00751	558	0.00788	558	0.00725	558	0.00824	558	0.00746	558	0.00898	558	0.00951	558	0.00787	558	0.00835
558.2	0.00666	558.2	0.00665	558.2	0.00893	558.2	0.00744	558.2	0.00596	558.2	0.00703	558.2	0.00751	558.2	0.0078	558.2	0.00719	558.2	0.00822	558.2	0.0074	558.2	0.00882	558.2	0.00947	558.2	0.00783	558.2	0.00812
558.4	0.0066	558.4	0.00662	558.4	0.00883	558.4	0.00741	558.4	0.00593	558.4	0.00699	558.4	0.00739	558.4	0.0078	558.4	0.00716	558.4	0.00816	558.4	0.00736	558.4	0.00864	558.4	0.00921	558.4	0.00782	558.4	0.0081
558.6	0.00636	558.6	0.00661	558.6	0.0092	558.6	0.00736	558.6	0.00592	558.6	0.00693	558.6	0.00732	558.6	0.00779	558.6	0.00713	558.6	0.0081	558.6	0.0073	558.6	0.00863	558.6	0.00901	558.6	0.00773	558.6	0.008
558.8	0.00627	558.8	0.00661	558.8	0.00892	558.8	0.00724	558.8	0.00561	558.8	0.00686	558.8	0.00719	558.8	0.00779	558.8	0.00697	558.8	0.008	558.8	0.00725	558.8	0.00856	558.8	0.00876	558.8	0.00759	558.8	0.00792
559	0.00625	559	0.00655	559	0.00855	559	0.00709	559	0.00556	559	0.00683	559	0.00713	559	0.00773	559	0.00685	559	0.00793	559	0.00716	559	0.00838	559	0.00873	559	0.00757	559	0.00788
559.2	0.00625	559.2	0.00654	559.2	0.0084	559.2	0.00707	559.2	0.00554	559.2	0.00678	559.2	0.00713	559.2	0.00769	559.2	0.00683	559.2	0.00788	559.2	0.00698	559.2	0.00832	559.2	0.00871	559.2	0.00741	559.2	0.00779
559.4	0.0062	559.4	0.00636	559.4	0.00855	559.4	0.00688	559.4	0.00553	559.4	0.00675	559.4	0.00711	559.4	0.0076	559.4	0.00683	559.4	0.00781	559.4	0.00698	559.4	0.00827	559.4	0.00866	559.4	0.00725	559.4	0.00771
559.6	0.00617	559.6	0.00624	559.6	0.00818	559.6	0.00673	559.6	0.00551	559.6	0.00666	559.6	0.00705	559.6	0.0076	559.6	0.00671	559.6	0.00771	559.6	0.00695	559.6	0.00819	559.6	0.00862	559.6	0.00719	559.6	0.00765
559.8	0.00614	559.8	0.00619	559.8	0.00818	559.8	0.00673	559.8	0.00549	559.8	0.00665	559.8	0.00702	559.8	0.00729	559.8	0.00667	559.8	0.00765	559.8	0.00685	559.8	0.00806	559.8	0.00853	559.8	0.00718	559.8	0.00757
560	0.00611	560	0.00614	560	0.00807	560	0.00658	560	0.00542	560	0.00655	560	0.00701	560	0.00725	560	0.00664	560	0.00756	560	0.00676	560	0.00792	560	0.00846	560	0.007	560	0.00751
560.2	0.00602	560.2	0.0061	560.2	0.0082	560.2	0.00658	560.2	0.00512	560.2	0.00652	560.2	0.00701	560.2	0.00719	560.2	0.00659	560.2	0.00748	560.2	0.00674	560.2	0.00786	560.2	0.00823	560.2	0.00691	560.2	0.00746
560.4	0.00595	560.4	0.0061	560.4	0.00805	560.4	0.0065	560.4	0.00512	560.4	0.00641	560.4	0.00701	560.4	0.00719	560.4	0.00657	560.4	0.00737	560.4	0.00673	560.4	0.00776	560.4	0.00807	560.4	0.00684	560.4	0.00721
560.6	0.00576	560.6	0.00601	560.6	0.00741	560.6	0.00648	560.6	0.00512	560.6	0.00638	560.6	0.00693	560.6	0.00704	560.6	0.00636	560.6	0.00731	560.6	0.00656	560.6	0.0077	560.6	0.00806	560.6	0.00684	560.6	0.00708
560.8	0.00575	560.8	0.006	560.8	0.00813	560.8	0.00648	560.8	0.0051	560.8	0.00629	560.8	0.00688	560.8	0.00699	560.8	0.00623	560.8	0.00724	560.8	0.00646	560.8	0.00767	560.8	0.00792	560.8	0.00683	560.8	0.007
561	0.00575	561	0.00572	561	0.00796	561	0.00641	561	0.00512	561	0.00628	561	0.00665	561	0.00683	561	0.00623	561	0.00718	561	0.00643	561	0.00765	561	0.00784	561	0.0068	561	0.00699
561.2	0.00575	561.2	0.00553	561.2	0.00729	561.2	0.00631	561.2	0.00514	561.2	0.00617	561.2	0.00663	561.2	0.00681	561.2	0.00612	561.2	0.00709	561.2	0.0064	561.2	0.00755	561.2	0.00783	561.2	0.00671	561.2	0.00694
561.4	0.00574	561.4	0.0054	561.4	0.00743	561.4	0.00628	561.4	0.00514	561.4	0.00616	561.4	0.00661	561.4	0.00676	561.4	0.00611	561.4	0.00705	561.4	0.00638	561.4	0.00754	561.4	0.0078	561.4	0.00663	561.4	0.00693
561.6	0.00566	561.6	0.0054	561.6	0.00793	561.6	0.00623	561.6	0.00514	561.6	0.00606	561.6	0.00657	561.6	0.00672	561.6	0.00609	561.6	0.00697	561.6	0.00632	561.6	0.00742	561.6	0.00762	561.6	0.0065	561.6	0.0068
561.8	0.00564	561.8	0.00538	561.8	0.00773	561.8	0.00612	561.8	0.00514	561.8	0.00604	561.8	0.00651	561.8	0.00669	561.8	0.00597	561.8	0.00689	561.8	0.00623	561.8	0.00731	561.8	0.00754	561.8	0.00644	561.8	0.0068
562	0.00563	562	0.0053	562	0.00737	562	0.00607	562	0.00513	562	0.00601	562	0.00647	562	0.00653	562	0.00592	562	0.0068	562	0.00609	562	0.00719	562	0.00748	562	0.00632	562	0.00672
562.2	0.00551	562.2	0.00528	562.2	0.00744	562.2	0.00603	562.2	0.00513	562.2	0.00588	562.2	0.00625	562.2	0.00651	562.2	0.00589	562.2	0.00677	562.2	0.00589	562.2	0.00711	562.2	0.00741	562.2	0.0062	562.2	0.00669
562.4	0.00528	562.4	0.00526	562.4	0.00697	562.4	0.00588	562.4	0.00511	562.4	0.00587	562.4	0.00623	562.4	0.0065	562.4	0.00565	562.4	0.00666	562.4	0.00587	562.4	0.00706	562.4	0.0073	562.4	0.00617	562.4	0.00668
562.6	0.00514	562.6	0.00519	562.6	0.00695	562.6	0.00577	562.6	0.00511	562.6	0.00583	562.6	0.0062	562.6	0.0065	562.6	0.00564	562.6	0.0066	562.6	0.00585	562.6	0.00697	562.6	0.00712	562.6	0.00614	562.6	0.00667
562.8	0.00503	562.8	0.00519	562.8	0.00752	562.8	0.00565	562.8	0.0051	562.8	0.0058	562.8	0.00615	562.8	0.00646	562.8	0.00562	562.8	0.00656	562.8	0.00581	562.8	0.00696	562.8	0.00709	562.8	0.00611	562.8	0.00663
563	0.00503	563	0.00515	563	0.00704	563	0.00558	563	0.00488	563	0.00576	563	0.00608	563	0.00645	563	0.00561	563	0.00645	563	0.0058	563	0.00687	563	0.00676	563	0.00602	563	0.00654
563.2	0.00498	563.2	0.00508	563.2	0.00689	563.2	0.00556	563.2	0.00484	563.2	0.00574	563.2	0.00608	563.2	0.00638	563.2	0.00553	563.2	0.0064	563.2	0.00579	563.2	0.00683	563.2	0.00676	563.2	0.00601	563.2	0.00647
563.4	0.00498	563.4	0.00487	563.4	0.00688	563.4	0.00552	563.4	0.00481	563.4	0.00562	563.4	0.00607	563.4	0.00638	563.4	0.00547	563.4	0.00634	563.4	0.00578	563.4	0.00674	563.4	0.00671	563.4	0.00601	563.4	0.00644
563.6	0.00496	563.6	0.00484	563.6	0.00673	563.6	0.00551	563.6	0.00472	563.6	0.00561	563.6	0.00584	563.6	0.00631	563.6	0.00537	563.6	0.00626	563.6	0.00571	563.6	0.0067	563.6	0.00666	563.6	0.00594	563.6	0.00637
563.8	0.00486	563.8	0.00477	563.8	0.00677	563.8	0.00544	563.8	0.00459	563.8	0.00537	563.8	0.00573	563.8	0.00626	563.8	0.00535	563.8	0.00624	563.8	0.00565	563.8	0.0067	563.8	0.00663	563.8	0.00583	563.8	0.00623
564	0.0048	564	0.00476	564	0.00662	564	0.00534	564	0.00451	564	0.00529	564	0.00573	564	0.00625	564	0.00534	564	0.00616	564	0.00561	564	0.00657	564	0.00663	564	0.0057	564	0.00596
564.2	0.00479	564.2	0.00476	564.2	0.00668	564.2	0.00532	564.2	0.00448	564.2	0.00524	564.2	0.00567	564.2	0.00613	564.2	0.00531	564.2	0.0061	564.2	0.00557	564.2	0.0065	564.2	0.00647	564.2	0.00565	564.2	0.00596
564.4	0.00473	564.4	0.00476	564.4	0.00669	564.4	0.00526	564.4	0.00447	564.4	0.00514	564.4	0.00552	564.4	0.00591	564.4	0.00521	564.4	0.00604	564.4	0.00544	564.4	0.00637	564.4	0.0064	564.4	0.00564	564.4	0.00593
564.6	0.00468	564.6	0.00467	564.6	0.00615	564.6	0.00518	564.6	0.00435	564.6	0.0051	564.6	0.00548	564.6	0.00589	564.6	0.00519	564.6	0.00601	564.6	0.00536	564.6	0.00625	564.6	0.00634	564.6	0.00564	564.6	0.00591
564.8	0.00467	564.8	0.00466	564.8	0.00615	564.8	0.00514	564.8	0.00434	564.8	0.00509	564.8	0.00527	564.8	0.00587	564.8	0.00513	564.8	0.00593	564.8	0.0053	564.8	0.00618	564.8	0.00623	564.8	0.00555	564.8	0.00588
565	0.00463	565	0.00456	565	0.00647	565	0.00506	565	0.00432	565	0.00508	565	0.00516	565	0.00584	565	0.00506	565	0.00586	565	0.00528	565	0.00605	565	0.00602	565	0.00551	565	0.00575
565.2	0.00457	565.2	0.00455	565.2	0.00625	565.2	0.00504	565.2	0.00422	565.2	0.00508	565.2	0.00498	565.2	0.00568	565.2	0.00495	565.2	0.00579	565.2	0.00525	565.2	0.00599	565.2	0.00602	565.2	0.00548	565.2	0.00574
565.4	0.00454	565.4	0.00452	565.4	0.00626	565.4	0.00494	565.4	0.00409	565.4	0.00497	565.4	0.00497	565.4	0.00556	565.4	0.00481	565.4	0.00572	565.4	0.00524	565.4	0.00595	565.4	0.00591	565.4	0.00544	565.4	0.00566
565.6	0.0045	565.6	0.00452	565.6	0.00603	565.6	0.00492	565.6	0.00401	565.6	0.00497	565.6	0.00497	565.6	0.00556	565.6	0.00472	565.6	0.00565	565.6	0.00505	565.6	0.00592	565.6	0.00588	565.6	0.00537	565.6	0.00544
565.8	0.00439	565.8	0.00451	565.8	0.00616	565.8	0.00492	565.8	0.00401	565.8	0.00491	565.8	0.00497	565.8	0.00551	565.8	0.0047	565.8	0.00562	565.8	0.00504	565.8	0.0059	565.8	0.00588	565.8	0.00536	565.8	0.00538
566	0.00425	566	0.00452	566	0.00635	566	0.00476	566	0.00401	566	0.00491	566	0.00497	566	0.00546	566	0.0047	566	0.00556	566	0.00502	566	0.00585	566	0.0058	566	0.00534	566	0.00537
566.2	0.00425	566.2	0.00445	566.2	0.00653	566.2	0.00472	566.2	0.00401	566.2	0.00479	566.2	0.00494	566.2	0.00537	566.2	0.00467	566.2	0.0055	566.2	0.0049	566.2	0.00585	566.2	0.0058	566.2	0.0052	566.2	0.00535
566.4	0.00425	566.4	0.00445	566.4	0.00599	566.4	0.00468	566.4	0.00401	566.4	0.00476	566.4	0.00494	566.4	0.00534	566.4	0.00465	566.4	0.00542	566.4	0.00481	566.4	0.00575	566.4	0.00578	566.4	0.00505	566.4	0.00534
566.6	0.00424	566.6	0.00445	566.6	0.00602	566.6	0.00465	566.6	0.00401	566.6	0.00475	566.6	0.00494	566.6	0.0053	566.6	0.0046	566.6	0.00537	566.6	0.0048	566.6	0.00558	566.6	0.00574	566.6	0.00502	566.6	0.00528
566.8	0.00418	566.8	0.00445	566.8	0.0059	566.8	0.00458	566.8	0.00399	566.8	0.00469	566.8	0.00494	566.8	0.00526	566.8	0.00459	566.8	0.0053	566.8	0.00475	566.8	0.00551	566.8	0.00566	566.8	0.005	566.8	0.0052
567	0.00418	567	0.00441	567	0.00562	567	0.00457	567	0.00399	567	0.00468	567	0.00474	567	0.00526	567	0.00454	567	0.00525	567	0.00472	567	0.0055	567	0.00545	567	0.00498	567	0.0052
567.2	0.00418	567.2	0.00436	567.2	0.00562	567.2	0.00457	567.2	0.00398	567.2	0.00465	567.2	0.00454	567.2	0.00512	567.2	0.00454	567.2	0.0052	567.2	0.00461	567.2	0.0054	567.2	0.00538	567.2	0.00475	567.2	0.00519
567.4	0.00418	567.4	0.00422	567.4	0.0056	567.4	0.00452	567.4	0.0039	567.4	0.00463	567.4	0.0045	567.4	0.00504	567.4	0.00453	567.4	0.00512	567.4	0.00461	567.4	0.00533	567.4	0.00534	567.4	0.00474	567.4	0.00517
567.6	0.00416	567.6	0.00402	567.6	0.00578	567.6	0.00445	567.6	0.00377	567.6	0.00461	567.6	0.0045	567.6	0.00496	567.6	0.00452	567.6	0.00505	567.6	0.0046	567.6	0.00526	567.6	0.00527	567.6	0.00474	567.6	0.00502
567.8	0.00415	567.8	0.00402	567.8	0.00575	567.8	0.00436	567.8	0.00369	567.8	0.00456	567.8	0.0045	567.8	0.00492	567.8	0.00448	567.8	0.00498	567.8	0.00453	567.8	0.00524	567.8	0.00509	567.8	0.00472	567.8	0.0049
568	0.0041	568	0.00394	568	0.00557	568	0.00435	568	0.00363	568	0.00455	568	0.0045	568	0.00487	568	0.00442	568	0.00492	568	0.00443	568	0.00521	568	0.00508	568	0.00467	568	0.00484
568.2	0.00399	568.2	0.00387	568.2	0.00532	568.2	0.00433	568.2	0.00352	568.2	0.00445	568.2	0.00451	568.2	0.00483	568.2	0.00439	568.2	0.00488	568.2	0.00436	568.2	0.00521	568.2	0.00505	568.2	0.00467	568.2	0.00482
568.4	0.00396	568.4	0.00387	568.4	0.00555	568.4	0.00428	568.4	0.00349	568.4	0.00443	568.4	0.00451	568.4	0.0048	568.4	0.00438	568.4	0.00482	568.4	0.00425	568.4	0.00509	568.4	0.00505	568.4	0.00465	568.4	0.00476
568.6	0.0039	568.6	0.00385	568.6	0.0055	568.6	0.00428	568.6	0.00349	568.6	0.00442	568.6	0.00451	568.6	0.00479	568.6	0.00437	568.6	0.00477	568.6	0.00423	568.6	0.00506	568.6	0.005	568.6	0.0045	568.6	0.00453
568.8	0.00388	568.8	0.00378	568.8	0.00526	568.8	0.00421	568.8	0.00342	568.8	0.00432	568.8	0.00451	568.8	0.00467	568.8	0.00434	568.8	0.00468	568.8	0.00413	568.8	0.00498	568.8	0.00492	568.8	0.00434	568.8	0.00448
569	0.00388	569	0.00372	569	0.00529	569	0.00414	569	0.00341	569	0.00428	569	0.00439	569	0.00464	569	0.00419	569	0.00465	569	0.00413	569	0.00496	569	0.00491	569	0.00422	569	0.00445
569.2	0.00387	569.2	0.00369	569.2	0.00525	569.2	0.00413	569.2	0.00338	569.2	0.00425	569.2	0.00429	569.2	0.00458	569.2	0.00409	569.2	0.00459	569.2	0.00411	569.2	0.00481	569.2	0.00489	569.2	0.00421	569.2	0.00435
569.4	0.00387	569.4	0.00369	569.4	0.00513	569.4	0.00407	569.4	0.00331	569.4	0.0041	569.4	0.00421	569.4	0.00448	569.4	0.00407	569.4	0.00456	569.4	0.00409	569.4	0.00477	569.4	0.00484	569.4	0.00417	569.4	0.00432
569.6	0.00387	569.6	0.0036	569.6	0.00506	569.6	0.004	569.6	0.00322	569.6	0.00404	569.6	0.0042	569.6	0.00438	569.6	0.00401	569.6	0.00451	569.6	0.00407	569.6	0.00468	569.6	0.0048	569.6	0.00413	569.6	0.00425
569.8	0.00379	569.8	0.00359	569.8	0.00482	569.8	0.00397	569.8	0.00322	569.8	0.00396	569.8	0.0042	569.8	0.00431	569.8	0.00399	569.8	0.00445	569.8	0.00399	569.8	0.00464	569.8	0.00474	569.8	0.00402	569.8	0.00419
570	0.00373	570	0.00359	570	0.00496	570	0.00391	570	0.00307	570	0.00392	570	0.00416	570	0.00429	570	0.00387	570	0.00439	570	0.00397	570	0.00462	570	0.00473	570	0.00396	570	0.0041
570.2	0.00366	570.2	0.00355	570.2	0.00479	570.2	0.00386	570.2	0.00294	570.2	0.00391	570.2	0.00413	570.2	0.00426	570.2	0.00382	570.2	0.00435	570.2	0.00391	570.2	0.00457	570.2	0.00461	570.2	0.00394	570.2	0.0041
570.4	0.00364	570.4	0.00355	570.4	0.00484	570.4	0.00379	570.4	0.00287	570.4	0.00391	570.4	0.00412	570.4	0.00422	570.4	0.00381	570.4	0.00428	570.4	0.00391	570.4	0.00452	570.4	0.00461	570.4	0.0039	570.4	0.00405
570.6	0.00361	570.6	0.00354	570.6	0.0047	570.6	0.00376	570.6	0.00287	570.6	0.00389	570.6	0.00412	570.6	0.00414	570.6	0.00375	570.6	0.00423	570.6	0.0039	570.6	0.00447	570.6	0.00446	570.6	0.00384	570.6	0.00396
570.8	0.00361	570.8	0.00354	570.8	0.00487	570.8	0.00375	570.8	0.00287	570.8	0.00388	570.8	0.00402	570.8	0.00406	570.8	0.00364	570.8	0.00417	570.8	0.00383	570.8	0.00446	570.8	0.00446	570.8	0.0038	570.8	0.00395
571	0.00351	571	0.0035	571	0.00472	571	0.00372	571	0.00294	571	0.00387	571	0.00399	571	0.00402	571	0.00361	571	0.00414	571	0.00373	571	0.00444	571	0.00434	571	0.00377	571	0.0039
571.2	0.00348	571.2	0.00348	571.2	0.00459	571.2	0.00362	571.2	0.00293	571.2	0.00377	571.2	0.00375	571.2	0.0039	571.2	0.00358	571.2	0.00405	571.2	0.00367	571.2	0.00433	571.2	0.0043	571.2	0.00374	571.2	0.00381
571.4	0.00343	571.4	0.00344	571.4	0.00467	571.4	0.00361	571.4	0.00303	571.4	0.00362	571.4	0.00358	571.4	0.00389	571.4	0.00357	571.4	0.00398	571.4	0.00358	571.4	0.00426	571.4	0.0043	571.4	0.00368	571.4	0.00372
571.6	0.00343	571.6	0.00339	571.6	0.00452	571.6	0.00347	571.6	0.00304	571.6	0.00362	571.6	0.00358	571.6	0.00389	571.6	0.00357	571.6	0.00392	571.6	0.00354	571.6	0.00423	571.6	0.00424	571.6	0.00362	571.6	0.00372
571.8	0.00338	571.8	0.00336	571.8	0.00481	571.8	0.00347	571.8	0.00304	571.8	0.00362	571.8	0.00357	571.8	0.00389	571.8	0.00358	571.8	0.00388	571.8	0.00344	571.8	0.00417	571.8	0.00416	571.8	0.00357	571.8	0.00371
572	0.00337	572	0.00334	572	0.00455	572	0.00344	572	0.00303	572	0.00345	572	0.00352	572	0.00383	572	0.00358	572	0.00383	572	0.00336	572	0.00416	572	0.00399	572	0.00351	572	0.00371
572.2	0.00335	572.2	0.0033	572.2	0.00465	572.2	0.0034	572.2	0.00293	572.2	0.00339	572.2	0.00348	572.2	0.00382	572.2	0.00358	572.2	0.00379	572.2	0.00334	572.2	0.00411	572.2	0.00392	572.2	0.00348	572.2	0.0037
572.4	0.00322	572.4	0.00322	572.4	0.00426	572.4	0.00337	572.4	0.0028	572.4	0.00327	572.4	0.00347	572.4	0.00382	572.4	0.00358	572.4	0.00376	572.4	0.00329	572.4	0.00406	572.4	0.00385	572.4	0.00343	572.4	0.0036
572.6	0.00312	572.6	0.00309	572.6	0.00431	572.6	0.00337	572.6	0.00265	572.6	0.00325	572.6	0.00346	572.6	0.00382	572.6	0.00356	572.6	0.00373	572.6	0.00328	572.6	0.00399	572.6	0.00383	572.6	0.00342	572.6	0.00354
572.8	0.00306	572.8	0.00306	572.8	0.00415	572.8	0.00337	572.8	0.00265	572.8	0.00324	572.8	0.00333	572.8	0.0038	572.8	0.00344	572.8	0.00368	572.8	0.00318	572.8	0.00392	572.8	0.00383	572.8	0.00335	572.8	0.00349
573	0.00303	573	0.00303	573	0.00407	573	0.00335	573	0.00262	573	0.00321	573	0.0033	573	0.00377	573	0.00332	573	0.00365	573	0.00317	573	0.0038	573	0.00381	573	0.00333	573	0.00348
573.2	0.00299	573.2	0.003	573.2	0.00437	573.2	0.00335	573.2	0.00262	573.2	0.00312	573.2	0.00322	573.2	0.00357	573.2	0.00332	573.2	0.00359	573.2	0.00311	573.2	0.00371	573.2	0.0038	573.2	0.00327	573.2	0.00344
573.4	0.00298	573.4	0.00299	573.4	0.00429	573.4	0.00332	573.4	0.00262	573.4	0.00311	573.4	0.00318	573.4	0.00351	573.4	0.0033	573.4	0.00355	573.4	0.00311	573.4	0.00365	573.4	0.00379	573.4	0.00323	573.4	0.00343
573.6	0.00294	573.6	0.00299	573.6	0.00392	573.6	0.00332	573.6	0.00262	573.6	0.00311	573.6	0.00315	573.6	0.00347	573.6	0.00326	573.6	0.00347	573.6	0.0031	573.6	0.00363	573.6	0.00376	573.6	0.00323	573.6	0.00335
573.8	0.00285	573.8	0.00298	573.8	0.00397	573.8	0.00318	573.8	0.00259	573.8	0.00307	573.8	0.00314	573.8	0.00345	573.8	0.00325	573.8	0.00344	573.8	0.00308	573.8	0.00362	573.8	0.00376	573.8	0.00317	573.8	0.0033
574	0.00285	574	0.00292	574	0.00361	574	0.00315	574	0.0025	574	0.00307	574	0.00314	574	0.00342	574	0.00323	574	0.00337	574	0.00308	574	0.00355	574	0.00367	574	0.0031	574	0.00328
574.2	0.00284	574.2	0.00292	574.2	0.00387	574.2	0.00308	574.2	0.00249	574.2	0.00306	574.2	0.00314	574.2	0.00337	574.2	0.00306	574.2	0.00334	574.2	0.00306	574.2	0.00353	574.2	0.00364	574.2	0.00308	574.2	0.0032
574.4	0.00284	574.4	0.00292	574.4	0.00381	574.4	0.00299	574.4	0.00246	574.4	0.00305	574.4	0.00314	574.4	0.00337	574.4	0.00295	574.4	0.00327	574.4	0.00306	574.4	0.00346	574.4	0.00362	574.4	0.00307	574.4	0.00316
574.6	0.00278	574.6	0.00286	574.6	0.00394	574.6	0.00299	574.6	0.00245	574.6	0.003	574.6	0.00313	574.6	0.00337	574.6	0.00293	574.6	0.00325	574.6	0.00294	574.6	0.00346	574.6	0.00347	574.6	0.00305	574.6	0.00313
574.8	0.00272	574.8	0.00283	574.8	0.00362	574.8	0.00291	574.8	0.00243	574.8	0.00298	574.8	0.0031	574.8	0.00332	574.8	0.00291	574.8	0.00323	574.8	0.00291	574.8	0.00342	574.8	0.00347	574.8	0.00302	574.8	0.00307
575	0.00266	575	0.00282	575	0.00356	575	0.00286	575	0.00237	575	0.00292	575	0.00306	575	0.00327	575	0.00281	575	0.0032	575	0.00286	575	0.00338	575	0.00341	575	0.00296	575	0.00305
575.2	0.00264	575.2	0.00271	575.2	0.00359	575.2	0.00279	575.2	0.00236	575.2	0.00287	575.2	0.00297	575.2	0.00319	575.2	0.00278	575.2	0.00316	575.2	0.00284	575.2	0.00332	575.2	0.0034	575.2	0.00286	575.2	0.00302
575.4	0.00256	575.4	0.00267	575.4	0.00336	575.4	0.00276	575.4	0.00235	575.4	0.0028	575.4	0.00295	575.4	0.0031	575.4	0.00277	575.4	0.00313	575.4	0.00281	575.4	0.00325	575.4	0.00338	575.4	0.00281	575.4	0.00299
575.6	0.00256	575.6	0.00246	575.6	0.00368	575.6	0.00275	575.6	0.00232	575.6	0.00266	575.6	0.0027	575.6	0.00307	575.6	0.00276	575.6	0.00305	575.6	0.00281	575.6	0.00324	575.6	0.00336	575.6	0.00279	575.6	0.00291
575.8	0.00255	575.8	0.00244	575.8	0.0036	575.8	0.00273	575.8	0.0023	575.8	0.00266	575.8	0.00269	575.8	0.00301	575.8	0.00274	575.8	0.00299	575.8	0.00279	575.8	0.00322	575.8	0.00331	575.8	0.00278	575.8	0.00289
576	0.00254	576	0.00243	576	0.00382	576	0.00272	576	0.00229	576	0.00266	576	0.00265	576	0.003	576	0.00271	576	0.00296	576	0.00277	576	0.00311	576	0.00323	576	0.00276	576	0.00282
576.2	0.00249	576.2	0.00242	576.2	0.00376	576.2	0.0027	576.2	0.00223	576.2	0.00254	576.2	0.00264	576.2	0.00292	576.2	0.00267	576.2	0.00291	576.2	0.00273	576.2	0.00309	576.2	0.0032	576.2	0.0027	576.2	0.00282
576.4	0.00249	576.4	0.00241	576.4	0.00346	576.4	0.00267	576.4	0.00214	576.4	0.00254	576.4	0.00265	576.4	0.00279	576.4	0.00264	576.4	0.00285	576.4	0.00261	576.4	0.00301	576.4	0.00313	576.4	0.00265	576.4	0.00281
576.6	0.00247	576.6	0.00232	576.6	0.00341	576.6	0.00262	576.6	0.00213	576.6	0.00251	576.6	0.00265	576.6	0.00275	576.6	0.00261	576.6	0.00282	576.6	0.0025	576.6	0.00295	576.6	0.0031	576.6	0.00259	576.6	0.00279
576.8	0.00244	576.8	0.00231	576.8	0.00327	576.8	0.00261	576.8	0.00208	576.8	0.0025	576.8	0.00265	576.8	0.00273	576.8	0.00252	576.8	0.00278	576.8	0.00248	576.8	0.00291	576.8	0.00294	576.8	0.00258	576.8	0.00276
577	0.00236	577	0.00227	577	0.0032	577	0.00259	577	0.00207	577	0.00246	577	0.00265	577	0.00271	577	0.00252	577	0.00276	577	0.00244	577	0.00289	577	0.00291	577	0.00257	577	0.00273
577.2	0.00233	577.2	0.00225	577.2	0.00319	577.2	0.00258	577.2	0.00205	577.2	0.00244	577.2	0.00263	577.2	0.00269	577.2	0.00252	577.2	0.00273	577.2	0.00242	577.2	0.00283	577.2	0.0029	577.2	0.00252	577.2	0.00273
577.4	0.00233	577.4	0.00225	577.4	0.00322	577.4	0.00254	577.4	0.00191	577.4	0.00239	577.4	0.00263	577.4	0.00268	577.4	0.00252	577.4	0.00269	577.4	0.00242	577.4	0.00283	577.4	0.00289	577.4	0.00251	577.4	0.0027
577.6	0.00231	577.6	0.00224	577.6	0.00327	577.6	0.00251	577.6	0.00191	577.6	0.00237	577.6	0.00263	577.6	0.00264	577.6	0.00244	577.6	0.00267	577.6	0.0024	577.6	0.00281	577.6	0.00284	577.6	0.00243	577.6	0.0026
577.8	0.00229	577.8	0.00221	577.8	0.00306	577.8	0.00244	577.8	0.00188	577.8	0.00233	577.8	0.00262	577.8	0.00257	577.8	0.00237	577.8	0.00261	577.8	0.00236	577.8	0.00279	577.8	0.00279	577.8	0.00241	577.8	0.00258
578	0.00226	578	0.00221	578	0.00325	578	0.00243	578	0.0018	578	0.00233	578	0.00255	578	0.00253	578	0.00235	578	0.00255	578	0.00234	578	0.00273	578	0.00278	578	0.00237	578	0.00252
578.2	0.00226	578.2	0.00219	578.2	0.00292	578.2	0.00239	578.2	0.00178	578.2	0.00227	578.2	0.00249	578.2	0.00251	578.2	0.00233	578.2	0.00253	578.2	0.00234	578.2	0.00269	578.2	0.00271	578.2	0.00233	578.2	0.00251
578.4	0.00217	578.4	0.00217	578.4	0.00295	578.4	0.00239	578.4	0.00177	578.4	0.00221	578.4	0.00235	578.4	0.00251	578.4	0.00222	578.4	0.00247	578.4	0.00223	578.4	0.00264	578.4	0.00271	578.4	0.00232	578.4	0.00251
578.6	0.00213	578.6	0.00214	578.6	0.00285	578.6	0.00236	578.6	0.00173	578.6	0.00217	578.6	0.00226	578.6	0.00246	578.6	0.00219	578.6	0.00245	578.6	0.00217	578.6	0.00263	578.6	0.00269	578.6	0.00228	578.6	0.0025
578.8	0.00212	578.8	0.00212	578.8	0.00299	578.8	0.0023	578.8	0.00171	578.8	0.00216	578.8	0.00222	578.8	0.00245	578.8	0.00215	578.8	0.00242	578.8	0.00213	578.8	0.00261	578.8	0.00266	578.8	0.00226	578.8	0.00246
579	0.00212	579	0.00206	579	0.00274	579	0.0023	579	0.00171	579	0.00213	579	0.00221	579	0.00241	579	0.00212	579	0.00238	579	0.00213	579	0.00258	579	0.00259	579	0.00224	579	0.00243
579.2	0.00211	579.2	0.00195	579.2	0.00287	579.2	0.00223	579.2	0.00171	579.2	0.00211	579.2	0.00218	579.2	0.00239	579.2	0.00211	579.2	0.00236	579.2	0.00204	579.2	0.00257	579.2	0.00257	579.2	0.00224	579.2	0.00236
579.4	0.00211	579.4	0.00191	579.4	0.00286	579.4	0.00223	579.4	0.00171	579.4	0.0021	579.4	0.00218	579.4	0.00234	579.4	0.00208	579.4	0.00235	579.4	0.00204	579.4	0.00252	579.4	0.00256	579.4	0.00224	579.4	0.00232
579.6	0.00211	579.6	0.00191	579.6	0.00265	579.6	0.00214	579.6	0.00171	579.6	0.00201	579.6	0.00218	579.6	0.00233	579.6	0.00206	579.6	0.0023	579.6	0.00201	579.6	0.0025	579.6	0.00256	579.6	0.00215	579.6	0.00227
579.8	0.00208	579.8	0.00191	579.8	0.00265	579.8	0.00207	579.8	0.00169	579.8	0.00195	579.8	0.00206	579.8	0.00232	579.8	0.00205	579.8	0.00228	579.8	0.002	579.8	0.00245	579.8	0.00254	579.8	0.00212	579.8	0.00216
580	0.00203	580	0.00194	580	0.00266	580	0.00201	580	0.00168	580	0.00192	580	0.00206	580	0.00232	580	0.00204	580	0.00223	580	0.002	580	0.00245	580	0.00253	580	0.00209	580	0.00215
580.2	0.002	580.2	0.00191	580.2	0.00259	580.2	0.00199	580.2	0.00166	580.2	0.00192	580.2	0.00206	580.2	0.00232	580.2	0.00202	580.2	0.0022	580.2	0.00197	580.2	0.0024	580.2	0.00253	580.2	0.00208	580.2	0.00212
580.4	0.00197	580.4	0.00189	580.4	0.00278	580.4	0.00193	580.4	0.00165	580.4	0.00192	580.4	0.00206	580.4	0.00232	580.4	0.00202	580.4	0.00219	580.4	0.00189	580.4	0.0024	580.4	0.00251	580.4	0.00201	580.4	0.00212
580.6	0.00197	580.6	0.00186	580.6	0.00287	580.6	0.00188	580.6	0.00165	580.6	0.0019	580.6	0.00215	580.6	0.00228	580.6	0.002	580.6	0.00216	580.6	0.00182	580.6	0.00237	580.6	0.00248	580.6	0.00201	580.6	0.00212
580.8	0.00197	580.8	0.00184	580.8	0.00264	580.8	0.00188	580.8	0.00165	580.8	0.0019	580.8	0.00215	580.8	0.00221	580.8	0.00196	580.8	0.00211	580.8	0.00178	580.8	0.00231	580.8	0.00239	580.8	0.00201	580.8	0.00212
581	0.00194	581	0.00183	581	0.00263	581	0.00186	581	0.00165	581	0.0019	581	0.00215	581	0.00221	581	0.00187	581	0.0021	581	0.00177	581	0.00226	581	0.00238	581	0.00198	581	0.00207
581.2	0.00194	581.2	0.00175	581.2	0.00252	581.2	0.00181	581.2	0.00168	581.2	0.0019	581.2	0.00215	581.2	0.00215	581.2	0.00187	581.2	0.00206	581.2	0.00177	581.2	0.00222	581.2	0.00236	581.2	0.00196	581.2	0.00206
581.4	0.00188	581.4	0.00165	581.4	0.00245	581.4	0.00181	581.4	0.00168	581.4	0.00187	581.4	0.00207	581.4	0.00213	581.4	0.00187	581.4	0.00204	581.4	0.00174	581.4	0.00219	581.4	0.0023	581.4	0.00195	581.4	0.00206
581.6	0.00185	581.6	0.00165	581.6	0.00222	581.6	0.00179	581.6	0.00168	581.6	0.00186	581.6	0.00204	581.6	0.00213	581.6	0.00179	581.6	0.00202	581.6	0.00171	581.6	0.00216	581.6	0.00225	581.6	0.00191	581.6	0.00206
581.8	0.00173	581.8	0.00165	581.8	0.00234	581.8	0.00179	581.8	0.00168	581.8	0.00183	581.8	0.00203	581.8	0.00212	581.8	0.00179	581.8	0.00198	581.8	0.0017	581.8	0.00216	581.8	0.00224	581.8	0.00191	581.8	0.00203
582	0.00172	582	0.00165	582	0.00227	582	0.00179	582	0.00168	582	0.00179	582	0.00203	582	0.00203	582	0.00178	582	0.00195	582	0.00169	582	0.00216	582	0.00215	582	0.00188	582	0.00201
582.2	0.00167	582.2	0.00172	582.2	0.0023	582.2	0.00177	582.2	0.00152	582.2	0.00179	582.2	0.00203	582.2	0.00195	582.2	0.00177	582.2	0.00193	582.2	0.00167	582.2	0.00213	582.2	0.00215	582.2	0.00179	582.2	0.00199
582.4	0.00167	582.4	0.00172	582.4	0.00223	582.4	0.00178	582.4	0.00152	582.4	0.00179	582.4	0.00201	582.4	0.00192	582.4	0.00171	582.4	0.0019	582.4	0.00167	582.4	0.00211	582.4	0.00211	582.4	0.0017	582.4	0.00192
582.6	0.00166	582.6	0.00172	582.6	0.00237	582.6	0.00178	582.6	0.00145	582.6	0.00179	582.6	0.00196	582.6	0.00191	582.6	0.0017	582.6	0.0019	582.6	0.00164	582.6	0.00206	582.6	0.00203	582.6	0.00168	582.6	0.0019
582.8	0.00165	582.8	0.00173	582.8	0.00241	582.8	0.00177	582.8	0.00144	582.8	0.00179	582.8	0.00194	582.8	0.0019	582.8	0.00168	582.8	0.00186	582.8	0.00164	582.8	0.00202	582.8	0.00203	582.8	0.00166	582.8	0.00188
583	0.00165	583	0.00174	583	0.0024	583	0.00177	583	0.00144	583	0.00179	583	0.00185	583	0.00189	583	0.00168	583	0.00183	583	0.00164	583	0.00201	583	0.00203	583	0.00165	583	0.00178
583.2	0.00165	583.2	0.00174	583.2	0.00204	583.2	0.00175	583.2	0.00145	583.2	0.00179	583.2	0.00182	583.2	0.00187	583.2	0.00158	583.2	0.00179	583.2	0.00163	583.2	0.00197	583.2	0.00203	583.2	0.00164	583.2	0.00174
583.4	0.00165	583.4	0.00173	583.4	0.0021	583.4	0.00165	583.4	0.00145	583.4	0.00179	583.4	0.00174	583.4	0.00185	583.4	0.00158	583.4	0.00178	583.4	0.00162	583.4	0.00193	583.4	0.00203	583.4	0.0016	583.4	0.00174
583.6	0.0016	583.6	0.00173	583.6	0.00215	583.6	0.00156	583.6	0.00147	583.6	0.00171	583.6	0.00171	583.6	0.00185	583.6	0.00154	583.6	0.00176	583.6	0.00161	583.6	0.00193	583.6	0.00203	583.6	0.00158	583.6	0.00174
583.8	0.00157	583.8	0.00172	583.8	0.00221	583.8	0.00155	583.8	0.00144	583.8	0.00171	583.8	0.00167	583.8	0.00177	583.8	0.00154	583.8	0.00173	583.8	0.00155	583.8	0.00192	583.8	0.00203	583.8	0.00157	583.8	0.00172
584	0.00156	584	0.00156	584	0.00202	584	0.00153	584	0.00144	584	0.00165	584	0.00164	584	0.00177	584	0.00153	584	0.00171	584	0.00154	584	0.00183	584	0.00203	584	0.00151	584	0.00172
584.2	0.00155	584.2	0.00154	584.2	0.002	584.2	0.00151	584.2	0.00144	584.2	0.00159	584.2	0.00162	584.2	0.00172	584.2	0.00153	584.2	0.00168	584.2	0.00152	584.2	0.00183	584.2	0.00203	584.2	0.00148	584.2	0.00166
584.4	0.00149	584.4	0.00154	584.4	0.00198	584.4	0.00151	584.4	0.00141	584.4	0.00151	584.4	0.00162	584.4	0.0017	584.4	0.0015	584.4	0.00166	584.4	0.00152	584.4	0.00177	584.4	0.00203	584.4	0.00148	584.4	0.00166
584.6	0.00149	584.6	0.00154	584.6	0.00184	584.6	0.00146	584.6	0.00139	584.6	0.00151	584.6	0.00161	584.6	0.00167	584.6	0.00147	584.6	0.00163	584.6	0.00152	584.6	0.00173	584.6	0.00202	584.6	0.00148	584.6	0.00163
584.8	0.00147	584.8	0.00154	584.8	0.00192	584.8	0.00145	584.8	0.0013	584.8	0.00147	584.8	0.00159	584.8	0.00166	584.8	0.00146	584.8	0.0016	584.8	0.00151	584.8	0.0017	584.8	0.00202	584.8	0.00147	584.8	0.00159
585	0.00146	585	0.00154	585	0.0018	585	0.00145	585	0.00128	585	0.00145	585	0.00159	585	0.00156	585	0.00146	585	0.00158	585	0.00151	585	0.00169	585	0.00194	585	0.00146	585	0.00156
585.2	0.00145	585.2	0.00154	585.2	0.00191	585.2	0.00143	585.2	0.00128	585.2	0.00144	585.2	0.00155	585.2	0.00155	585.2	0.00143	585.2	0.00158	585.2	0.0015	585.2	0.00168	585.2	0.00188	585.2	0.00139	585.2	0.00156
585.4	0.00139	585.4	0.00152	585.4	0.00191	585.4	0.00141	585.4	0.00126	585.4	0.00143	585.4	0.00157	585.4	0.00151	585.4	0.0014	585.4	0.00155	585.4	0.00144	585.4	0.00168	585.4	0.00178	585.4	0.00139	585.4	0.00156
585.6	0.00139	585.6	0.00147	585.6	0.00188	585.6	0.0014	585.6	0.00128	585.6	0.00141	585.6	0.00157	585.6	0.0015	585.6	0.0014	585.6	0.00153	585.6	0.00143	585.6	0.00167	585.6	0.00172	585.6	0.00138	585.6	0.00154
585.8	0.00132	585.8	0.00143	585.8	0.0017	585.8	0.00137	585.8	0.00129	585.8	0.00139	585.8	0.00151	585.8	0.00149	585.8	0.00137	585.8	0.00151	585.8	0.00142	585.8	0.00167	585.8	0.00171	585.8	0.00137	585.8	0.00154
586	0.00124	586	0.0014	586	0.00182	586	0.00135	586	0.00128	586	0.00133	586	0.00149	586	0.00148	586	0.00131	586	0.00148	586	0.00135	586	0.00161	586	0.00171	586	0.00137	586	0.00153
586.2	0.00124	586.2	0.00139	586.2	0.00199	586.2	0.00132	586.2	0.00128	586.2	0.00133	586.2	0.00147	586.2	0.00142	586.2	0.0013	586.2	0.00147	586.2	0.00132	586.2	0.00159	586.2	0.00171	586.2	0.00137	586.2	0.00151
586.4	0.00124	586.4	0.00135	586.4	0.00196	586.4	0.00131	586.4	0.0012	586.4	0.00132	586.4	0.00147	586.4	0.00142	586.4	0.0013	586.4	0.00144	586.4	0.00131	586.4	0.00155	586.4	0.00172	586.4	0.00136	586.4	0.00151
586.6	0.00124	586.6	0.00127	586.6	0.00182	586.6	0.00131	586.6	0.00119	586.6	0.00131	586.6	0.00147	586.6	0.0014	586.6	0.00129	586.6	0.00143	586.6	0.00131	586.6	0.00155	586.6	0.00171	586.6	0.00133	586.6	0.00147
586.8	0.00126	586.8	0.00124	586.8	0.00175	586.8	0.0013	586.8	0.00114	586.8	0.00127	586.8	0.00147	586.8	0.00139	586.8	0.00128	586.8	0.00141	586.8	0.0013	586.8	0.00153	586.8	0.00169	586.8	0.00132	586.8	0.00144
587	0.00126	587	0.00124	587	0.00187	587	0.0013	587	0.0011	587	0.00127	587	0.00142	587	0.00138	587	0.00128	587	0.00139	587	0.00124	587	0.00153	587	0.00167	587	0.00131	587	0.00142
587.2	0.00126	587.2	0.00124	587.2	0.00168	587.2	0.00129	587.2	0.00101	587.2	0.00126	587.2	0.00142	587.2	0.00137	587.2	0.00127	587.2	0.00137	587.2	0.00119	587.2	0.00148	587.2	0.00163	587.2	0.00126	587.2	0.00141
587.4	0.00126	587.4	0.00124	587.4	0.00176	587.4	0.00124	587.4	0.000957544	587.4	0.00124	587.4	0.00142	587.4	0.00136	587.4	0.00119	587.4	0.00135	587.4	0.00114	587.4	0.00147	587.4	0.00162	587.4	0.00126	587.4	0.00139
587.6	0.00126	587.6	0.00124	587.6	0.00156	587.6	0.00118	587.6	0.000895039	587.6	0.00124	587.6	0.00142	587.6	0.00136	587.6	0.00118	587.6	0.00133	587.6	0.00112	587.6	0.00143	587.6	0.00162	587.6	0.00126	587.6	0.00138
587.8	0.00126	587.8	0.00125	587.8	0.00164	587.8	0.00118	587.8	0.000884622	587.8	0.00124	587.8	0.00142	587.8	0.00136	587.8	0.00117	587.8	0.00131	587.8	0.00111	587.8	0.00141	587.8	0.00161	587.8	0.00125	587.8	0.00134
588	0.0012	588	0.00126	588	0.00149	588	0.00117	588	0.000880281	588	0.00123	588	0.00141	588	0.00135	588	0.00116	588	0.00129	588	0.00111	588	0.00141	588	0.00162	588	0.00123	588	0.00129
588.2	0.00118	588.2	0.00126	588.2	0.00149	588.2	0.00117	588.2	0.000880281	588.2	0.00119	588.2	0.00138	588.2	0.00135	588.2	0.00115	588.2	0.00128	588.2	0.0011	588.2	0.00141	588.2	0.00163	588.2	0.00122	588.2	0.00129
588.4	0.00114	588.4	0.00125	588.4	0.00141	588.4	0.00115	588.4	0.000884622	588.4	0.00114	588.4	0.00133	588.4	0.00135	588.4	0.00115	588.4	0.00126	588.4	0.00111	588.4	0.0014	588.4	0.00162	588.4	0.00118	588.4	0.00123
588.6	0.00107	588.6	0.00124	588.6	0.00149	588.6	0.00115	588.6	0.000884622	588.6	0.00112	588.6	0.00133	588.6	0.00126	588.6	0.0011	588.6	0.00125	588.6	0.00109	588.6	0.00139	588.6	0.00162	588.6	0.00118	588.6	0.00123
588.8	0.00105	588.8	0.00118	588.8	0.00162	588.8	0.00114	588.8	0.000926292	588.8	0.00112	588.8	0.00133	588.8	0.00126	588.8	0.0011	588.8	0.00124	588.8	0.00107	588.8	0.00135	588.8	0.00163	588.8	0.00117	588.8	0.00123
589	0.00102	589	0.00112	589	0.00148	589	0.00111	589	0.000932369	589	0.00112	589	0.00127	589	0.00125	589	0.0011	589	0.00122	589	0.00107	589	0.00133	589	0.00163	589	0.00115	589	0.00123
589.2	0.00102	589.2	0.00112	589.2	0.00146	589.2	0.00109	589.2	0.000934973	589.2	0.00112	589.2	0.00122	589.2	0.00122	589.2	0.0011	589.2	0.0012	589.2	0.00107	589.2	0.00131	589.2	0.00163	589.2	0.00112	589.2	0.00123
589.4	0.00102	589.4	0.00112	589.4	0.00138	589.4	0.00107	589.4	0.000936709	589.4	0.0011	589.4	0.00112	589.4	0.00121	589.4	0.0011	589.4	0.00117	589.4	0.00104	589.4	0.00131	589.4	0.00162	589.4	0.00111	589.4	0.00123
589.6	0.00102	589.6	0.00112	589.6	0.00161	589.6	0.00107	589.6	0.000936709	589.6	0.00108	589.6	0.00105	589.6	0.00121	589.6	0.0011	589.6	0.00117	589.6	0.00102	589.6	0.0013	589.6	0.00158	589.6	0.00108	589.6	0.00124
589.8	0.00104	589.8	0.00113	589.8	0.00148	589.8	0.00107	589.8	0.000936709	589.8	0.00108	589.8	0.00101	589.8	0.00121	589.8	0.00108	589.8	0.00115	589.8	0.000983996	589.8	0.00128	589.8	0.00155	589.8	0.00108	589.8	0.00124
590	0.00104	590	0.00117	590	0.00131	590	0.00107	590	0.000936709	590	0.00108	590	0.00101	590	0.00119	590	0.00101	590	0.00114	590	0.000983996	590	0.00127	590	0.00145	590	0.00108	590	0.00121
590.2	0.00104	590.2	0.00118	590.2	0.0015	590.2	0.00107	590.2	0.000897643	590.2	0.00107	590.2	0.00101	590.2	0.00117	590.2	0.00099177	590.2	0.00111	590.2	0.000983996	590.2	0.00127	590.2	0.00142	590.2	0.00105	590.2	0.00117
590.4	0.00104	590.4	0.00118	590.4	0.00138	590.4	0.00104	590.4	0.00088983	590.4	0.001	590.4	0.00101	590.4	0.00117	590.4	0.00098195	590.4	0.0011	590.4	0.000964851	590.4	0.00123	590.4	0.00135	590.4	0.00102	590.4	0.00118
590.6	0.00103	590.6	0.00119	590.6	0.00145	590.6	0.000987024	590.6	0.00084816	590.6	0.000989461	590.6	0.00101	590.6	0.00113	590.6	0.000971238	590.6	0.00109	590.6	0.000964851	590.6	0.00122	590.6	0.00135	590.6	0.00101	590.6	0.00118
590.8	0.00103	590.8	0.00119	590.8	0.00132	590.8	0.000978336	590.8	0.000841215	590.8	0.00097403	590.8	0.00106	590.8	0.00109	590.8	0.000961716	590.8	0.00107	590.8	0.000964851	590.8	0.00121	590.8	0.00133	590.8	0.00101	590.8	0.00116
591	0.000992574	591	0.00117	591	0.00135	591	0.000966249	591	0.00080649	591	0.00096712	591	0.00106	591	0.00109	591	0.000954575	591	0.00106	591	0.000983996	591	0.00118	591	0.00131	591	0.000996974	591	0.00115
591.2	0.000989235	591.2	0.00117	591.2	0.00131	591.2	0.000934896	591.2	0.000761348	591.2	0.00096712	591.2	0.00107	591.2	0.00108	591.2	0.000924819	591.2	0.00104	591.2	0.000988129	591.2	0.00116	591.2	0.0013	591.2	0.000955767	591.2	0.00114
591.4	0.000962104	591.4	0.00111	591.4	0.00142	591.4	0.000916765	591.4	0.000761348	591.4	0.000962514	591.4	0.00109	591.4	0.00107	591.4	0.000921545	591.4	0.00104	591.4	0.000957889	591.4	0.00114	591.4	0.00129	591.4	0.000948876	591.4	0.00107
591.6	0.000962104	591.6	0.0011	591.6	0.00117	591.6	0.000916765	591.6	0.00076482	591.6	0.00095307	591.6	0.00111	591.6	0.00107	591.6	0.000911726	591.6	0.00102	591.6	0.000955931	591.6	0.00112	591.6	0.00127	591.6	0.00094536	591.6	0.00103
591.8	0.000943321	591.8	0.00108	591.8	0.0013	591.8	0.000916765	591.8	0.00080649	591.8	0.000951688	591.8	0.00109	591.8	0.00101	591.8	0.000911726	591.8	0.000999948	591.8	0.000957889	591.8	0.0011	591.8	0.00126	591.8	0.000938469	591.8	0.00103
592	0.000932886	592	0.00106	592	0.0013	592	0.000916199	592	0.000808226	592	0.000933032	592	0.00107	592	0.000990043	592	0.000911131	592	0.000987168	592	0.000966374	592	0.00108	592	0.00126	592	0.000938469	592	0.00102
592.2	0.00090659	592.2	0.000980114	592.2	0.00116	592.2	0.000916199	592.2	0.000808226	592.2	0.000922207	592.2	0.00102	592.2	0.000966375	592.2	0.000906965	592.2	0.000970129	592.2	0.000966374	592.2	0.00107	592.2	0.00124	592.2	0.000938469	592.2	0.000992452
592.4	0.000889894	592.4	0.000975648	592.4	0.00116	592.4	0.000916199	592.4	0.000830798	592.4	0.000912534	592.4	0.000838943	592.4	0.000964882	592.4	0.000905775	592.4	0.000965532	592.4	0.000966374	592.4	0.00107	592.4	0.00123	592.4	0.000935094	592.4	0.00101
592.6	0.000882381	592.6	0.000973166	592.6	0.00127	592.6	0.000886924	592.6	0.000865523	592.6	0.000908388	592.6	0.000796348	592.6	0.000959338	592.6	0.000895063	592.6	0.000969904	592.6	0.000957889	592.6	0.00107	592.6	0.00123	592.6	0.000935094	592.6	0.00101
592.8	0.00083438	592.8	0.000973166	592.8	0.00118	592.8	0.000872192	592.8	0.000865523	592.8	0.000880519	592.8	0.000796348	592.8	0.000953581	592.8	0.000879887	592.8	0.000964187	592.8	0.000957454	592.8	0.00107	592.8	0.00121	592.8	0.000935094	592.8	0.00101
593	0.000807666	593	0.000968204	593	0.00123	593	0.000856327	593	0.000868995	593	0.000878446	593	0.000796348	593	0.000953581	593	0.000873043	593	0.000945803	593	0.000957454	593	0.00107	593	0.00121	593	0.000924968	593	0.00101
593.2	0.000807666	593.2	0.000898228	593.2	0.00119	593.2	0.000808355	593.2	0.000868995	593.2	0.000835837	593.2	0.000763012	593.2	0.000953581	593.2	0.000838228	593.2	0.000924503	593.2	0.000905676	593.2	0.00106	593.2	0.00116	593.2	0.000919905	593.2	0.00098202
593.4	0.000807666	593.4	0.000889295	593.4	0.00109	593.4	0.000790412	593.4	0.000868995	593.4	0.000823169	593.4	0.000796348	593.4	0.000932897	593.4	0.000838228	593.4	0.00090993	593.4	0.000834536	593.4	0.00105	593.4	0.00114	593.4	0.000887277	593.4	0.000966372
593.6	0.000817684	593.6	0.000886814	593.6	0.00121	593.6	0.000782858	593.6	0.00081604	593.6	0.000800828	593.6	0.000850981	593.6	0.000917971	593.6	0.000842692	593.6	0.00090085	593.6	0.00082888	593.6	0.00101	593.6	0.00114	593.6	0.000873354	593.6	0.000941334
593.8	0.000817684	593.8	0.000886814	593.8	0.00111	593.8	0.000781158	593.8	0.000794336	593.8	0.000775262	593.8	0.000850981	593.8	0.000881721	593.8	0.000842692	593.8	0.000881792	593.8	0.000826269	593.8	0.000964206	593.8	0.00114	593.8	0.000829054	593.8	0.000915602
594	0.000817684	594	0.000879866	594	0.00126	594	0.000770392	594	0.000791732	594	0.000775262	594	0.000888021	594	0.000880228	594	0.000842097	594	0.000874506	594	0.000780365	594	0.0009274	594	0.00113	594	0.000826803	594	0.000907604
594.2	0.000817684	594.2	0.00087937	594.2	0.00112	594.2	0.000764349	594.2	0.000789128	594.2	0.000774571	594.2	0.000894502	594.2	0.00086978	594.2	0.000842097	594.2	0.000872936	594.2	0.000780365	594.2	0.00089678	594.2	0.00113	594.2	0.000793894	594.2	0.000904126
594.4	0.000817684	594.4	0.000869444	594.4	0.00114	594.4	0.000764349	594.4	0.000715337	594.4	0.000761673	594.4	0.000900984	594.4	0.000864022	594.4	0.000842097	594.4	0.000855224	594.4	0.000774709	594.4	0.000893739	594.4	0.00112	594.4	0.000781096	594.4	0.00090204
594.6	0.000806414	594.6	0.000849097	594.6	0.00111	594.6	0.000772659	594.6	0.000692765	594.6	0.000753842	594.6	0.000900984	594.6	0.000864022	594.6	0.000842097	594.6	0.000841324	594.6	0.000771011	594.6	0.000886923	594.6	0.00106	594.6	0.000780956	594.6	0.000890216
594.8	0.00079264	594.8	0.000844134	594.8	0.00114	594.8	0.000772659	594.8	0.000692765	594.8	0.000753842	594.8	0.000880613	594.8	0.000864022	594.8	0.000790619	594.8	0.000842893	594.8	0.000763396	594.8	0.000886923	594.8	0.00106	594.8	0.000758454	594.8	0.000888826
595	0.000756744	595	0.000844134	595	0.00112	595	0.000764349	595	0.000690161	595	0.000747393	595	0.000880613	595	0.00086978	595	0.000790619	595	0.000835158	595	0.000742076	595	0.000859869	595	0.00103	595	0.000743968	595	0.000864831
595.2	0.000750483	595.2	0.000830735	595.2	0.001	595.2	0.000764349	595.2	0.000686689	595.2	0.000747393	595.2	0.000880613	595.2	0.000856559	595.2	0.000790619	595.2	0.000827871	595.2	0.000734679	595.2	0.000857667	595.2	0.00102	595.2	0.000741859	595.2	0.000849531
595.4	0.000730448	595.4	0.000792025	595.4	0.00113	595.4	0.000764349	595.4	0.000668458	595.4	0.000732653	595.4	0.000825979	595.4	0.000856559	595.4	0.000790619	595.4	0.000819912	595.4	0.000729893	595.4	0.000844978	595.4	0.00101	595.4	0.000736936	595.4	0.000846749
595.6	0.000730448	595.6	0.000792025	595.6	0.00113	595.6	0.00074905	595.6	0.000668458	595.6	0.000729659	595.6	0.000800978	595.6	0.000856559	595.6	0.000790619	595.6	0.000802424	595.6	0.000693996	595.6	0.000843825	595.6	0.000987026	595.6	0.000736936	595.6	0.000846749
595.8	0.00074297	595.8	0.000747856	595.8	0.00111	595.8	0.000720531	595.8	0.000599008	595.8	0.000728507	595.8	0.00077968	595.8	0.000855493	595.8	0.000757292	595.8	0.000794241	595.8	0.000692256	595.8	0.000836904	595.8	0.000987026	595.8	0.000732436	595.8	0.000847444
596	0.000733369	596	0.00072602	596	0.000968641	596	0.000715054	596	0.00062592	596	0.000717451	596	0.000752827	596	0.000830118	596	0.000754316	596	0.000783255	596	0.000686817	596	0.000828515	596	0.000959091	596	0.000719357	596	0.000847444
596.2	0.000730448	596.2	0.00072602	596.2	0.00103	596.2	0.000712788	596.2	0.00062592	596.2	0.000698795	596.2	0.000736159	596.2	0.000764229	596.2	0.000754316	596.2	0.000764758	596.2	0.000686817	596.2	0.000823901	596.2	0.000930691	596.2	0.000716404	596.2	0.000849531
596.4	0.000730448	596.4	0.00072602	596.4	0.000801041	596.4	0.000697867	596.4	0.000619843	596.4	0.000678067	596.4	0.000707453	596.4	0.000760178	596.4	0.000753721	596.4	0.000756238	596.4	0.000686817	596.4	0.00080555	596.4	0.000896238	596.4	0.000712466	596.4	0.000847444
596.6	0.000725856	596.6	0.000740412	596.6	0.00087598	596.6	0.000687102	596.6	0.000599008	596.6	0.000670236	596.6	0.000707453	596.6	0.000759112	596.6	0.00067457	596.6	0.000755005	596.6	0.000682901	596.6	0.000795798	596.6	0.000891583	596.6	0.00070895	596.6	0.00086657
596.8	0.00070916	596.8	0.000747856	596.8	0.000939273	596.8	0.000683513	596.8	0.000599008	596.8	0.000649276	596.8	0.000707453	596.8	0.000750582	596.8	0.000662965	596.8	0.00075153	596.8	0.000682466	596.8	0.000786046	596.8	0.000888324	596.8	0.000704731	596.8	0.000874916
597	0.000695386	597	0.000747856	597	0.000945856	597	0.000681813	597	0.000609425	597	0.00064444	597	0.000707453	597	0.000750582	597	0.000661775	597	0.000747831	597	0.000662669	597	0.000783844	597	0.000877615	597	0.000698261	597	0.000874916
597.2	0.000685786	597.2	0.000740412	597.2	0.000836991	597.2	0.000677469	597.2	0.000619843	597.2	0.000640754	597.2	0.000710231	597.2	0.000759112	597.2	0.000648682	597.2	0.000734491	597.2	0.000661799	597.2	0.00076759	597.2	0.000874822	597.2	0.000698261	597.2	0.00086657
597.4	0.000654481	597.4	0.000740412	597.4	0.000980287	597.4	0.000668404	597.4	0.000609425	597.4	0.000634075	597.4	0.000715787	597.4	0.000759112	597.4	0.000648682	597.4	0.000728549	597.4	0.000645047	597.4	0.000763186	597.4	0.000869235	597.4	0.000698261	597.4	0.000849531
597.6	0.000634863	597.6	0.000683836	597.6	0.000807623	597.6	0.000668404	597.6	0.000576436	597.6	0.000627856	597.6	0.000733381	597.6	0.000750582	597.6	0.000648682	597.6	0.000713079	597.6	0.000624379	597.6	0.000763186	597.6	0.000863648	597.6	0.000694745	597.6	0.000838055
597.8	0.000634863	597.8	0.000683836	597.8	0.000973705	597.8	0.000644606	597.8	0.000568623	597.8	0.000627856	597.8	0.000733381	597.8	0.000725634	597.8	0.000648682	597.8	0.000704111	597.8	0.000611979	597.8	0.000762452	597.8	0.00085713	597.8	0.000694745	597.8	0.00080815
598	0.000654481	598	0.000666963	598	0.000831928	598	0.000634219	598	0.000544316	598	0.000620025	598	0.000733381	598	0.000717105	598	0.000653146	598	0.000690883	598	0.000608933	598	0.000754692	598	0.000809175	598	0.000689401	598	0.000799804
598.2	0.000654481	598.2	0.000662993	598.2	0.000939273	598.2	0.000633463	598.2	0.000565151	598.2	0.000620025	598.2	0.000733381	598.2	0.000710068	598.2	0.000653146	598.2	0.000688865	598.2	0.000595662	598.2	0.000751022	598.2	0.000809175	598.2	0.000689401	598.2	0.000778939
598.4	0.000692047	598.4	0.000662993	598.4	0.000927121	598.4	0.000622509	598.4	0.000565151	598.4	0.000620025	598.4	0.00067134	598.4	0.000699619	598.4	0.000662965	598.4	0.000689202	598.4	0.000592834	598.4	0.000736446	598.4	0.000805451	598.4	0.00068462	598.4	0.000778939
598.6	0.000692047	598.6	0.000662993	598.6	0.000816737	598.6	0.000614954	598.6	0.000544316	598.6	0.000620025	598.6	0.000630596	598.6	0.000690877	598.6	0.000662965	598.6	0.000668351	598.6	0.000592834	598.6	0.000718515	598.6	0.000805451	598.6	0.000668728	598.6	0.000778939
598.8	0.000692047	598.8	0.000647112	598.8	0.000905348	598.8	0.000579825	598.8	0.000529558	598.8	0.000618874	598.8	0.000488921	598.8	0.000682134	598.8	0.000662965	598.8	0.000655907	598.8	0.000592834	598.8	0.000679925	598.8	0.000805451	598.8	0.000634834	598.8	0.000763639
599	0.000692047	599	0.000628749	599	0.000725595	599	0.000579069	599	0.000529558	599	0.000611273	599	0.000488921	599	0.000682134	599	0.000653146	599	0.000646155	599	0.000572819	599	0.000679925	599	0.000834782	599	0.000632865	599	0.000759814
599.2	0.000647803	599.2	0.000606913	599.2	0.000982819	599.2	0.000561127	599.2	0.000529558	599.2	0.000611273	599.2	0.000488921	599.2	0.000645458	599.2	0.000633209	599.2	0.000635393	599.2	0.000533442	599.2	0.000679925	599.2	0.000844094	599.2	0.000621474	599.2	0.000759814
599.4	0.000647803	599.4	0.000606913	599.4	0.000787369	599.4	0.000558483	599.4	0.000525217	599.4	0.000597684	599.4	0.000488921	599.4	0.000632451	599.4	0.000618629	599.4	0.000633711	599.4	0.000533442	599.4	0.000679716	599.4	0.000859458	599.4	0.000612332	599.4	0.000730951
599.6	0.000647803	599.6	0.000606913	599.6	0.000752938	599.6	0.000558483	599.6	0.000525217	599.6	0.000578107	599.6	0.000499106	599.6	0.000610061	599.6	0.000579648	599.6	0.000631805	599.6	0.000533442	599.6	0.000679716	599.6	0.000859458	599.6	0.000611348	599.6	0.000719128
599.8	0.000635698	599.8	0.000602447	599.8	0.000810155	599.8	0.000557161	599.8	0.000525217	599.8	0.000570506	599.8	0.000537072	599.8	0.000596841	599.8	0.000567746	599.8	0.000627882	599.8	0.000533442	599.8	0.000679401	599.8	0.000859458	599.8	0.000611348	599.8	0.000712869
600	0.000613159	600	0.000588551	600	0.000688632	600	0.000546962	600	0.00054692	600	0.00052283	600	0.000556518	600	0.000593642	600	0.000560009	600	0.000609273	600	0.000542797	600	0.000667237	600	0.000844094	600	0.000611348	600	0.000697568
600.2	0.000606063	600.2	0.000582099	600.2	0.00077623	600.2	0.000531097	600.2	0.000559074	600.2	0.000504865	600.2	0.000556518	600.2	0.000577437	600.2	0.00052698	600.2	0.000604565	600.2	0.00054693	600.2	0.000667237	600.2	0.000810572	600.2	0.000611348	600.2	0.000689918
600.4	0.000597298	600.4	0.000602447	600.4	0.000821295	600.4	0.000520142	600.4	0.000559074	600.4	0.000503022	600.4	0.000561147	600.4	0.000540974	600.4	0.000486512	600.4	0.000600529	600.4	0.000549323	600.4	0.000664196	600.4	0.000799398	600.4	0.000611348	600.4	0.000659664
600.6	0.000527175	600.6	0.000582099	600.6	0.000683568	600.6	0.00051221	600.6	0.00054692	600.6	0.000490354	600.6	0.000596335	600.6	0.000512614	600.6	0.000468361	600.6	0.000593018	600.6	0.000550411	600.6	0.000658953	600.6	0.000793811	600.6	0.000609238	600.6	0.000642277
600.8	0.000523418	600.8	0.000569692	600.8	0.000742811	600.8	0.000507299	600.8	0.00054692	600.8	0.000490354	600.8	0.000622263	600.8	0.000512614	600.8	0.000438902	600.8	0.000576764	600.8	0.000549323	600.8	0.000658953	600.8	0.000774722	600.8	0.000609238	600.8	0.000598462
601	0.000502965	601	0.000566218	601	0.000784838	601	0.000504844	601	0.000533898	601	0.000493809	601	0.000622263	601	0.000512614	601	0.000438307	601	0.000573513	601	0.000549323	601	0.000646474	601	0.000771463	601	0.000597425	601	0.000576554
601.2	0.000500461	601.2	0.000546367	601.2	0.000685087	601.2	0.000497289	601.2	0.000482679	601.2	0.000490354	601.2	0.000642634	601.2	0.000512614	601.2	0.000438307	601.2	0.000562639	601.2	0.000550411	601.2	0.000646474	601.2	0.000771463	601.2	0.000591096	601.2	0.000576554
601.4	0.000493365	601.4	0.000528501	601.4	0.000709392	601.4	0.000497289	601.4	0.000480074	601.4	0.000490354	601.4	0.000650968	601.4	0.000519224	601.4	0.000436224	601.4	0.00055524	601.4	0.000550411	601.4	0.000646055	601.4	0.000771463	601.4	0.000555515	601.4	0.000576554
601.6	0.000491278	601.6	0.000528501	601.6	0.000641541	601.6	0.000497289	601.6	0.000465316	601.6	0.000491967	601.6	0.000691711	601.6	0.00052626	601.6	0.000436224	601.6	0.000556809	601.6	0.000550411	601.6	0.000634415	601.6	0.000764014	601.6	0.000555515	601.6	0.000567513
601.8	0.000491278	601.8	0.000525027	601.8	0.00080661	601.8	0.000473681	601.8	0.000465316	601.8	0.000491967	601.8	0.000691711	601.8	0.000536069	601.8	0.000438902	601.8	0.000539882	601.8	0.000548671	601.8	0.000620154	601.8	0.000751444	601.8	0.000549186	601.8	0.000565079
602	0.000479174	602	0.000525027	602	0.000680024	602	0.000471226	602	0.000455767	602	0.000491967	602	0.000691711	602	0.000557393	602	0.000442175	602	0.000534501	602	0.000534747	602	0.000600755	602	0.000705817	602	0.000538357	602	0.000567513
602.2	0.000478339	602.2	0.000525027	602.2	0.000789395	602.2	0.000458571	602.2	0.000454899	602.2	0.000488973	602.2	0.000691711	602.2	0.000557393	602.2	0.000442175	602.2	0.000528448	602.2	0.000519736	602.2	0.000578629	602.2	0.000711869	602.2	0.000537232	602.2	0.000569252
602.4	0.000455799	602.4	0.000528501	602.4	0.000730152	602.4	0.000457816	602.4	0.000455767	602.4	0.000452351	602.4	0.000669488	602.4	0.000536069	602.4	0.000446639	602.4	0.000520937	602.4	0.000516255	602.4	0.000578629	602.4	0.000705817	602.4	0.00051909	602.4	0.000585248
602.6	0.000453295	602.6	0.000528501	602.6	0.000691163	602.6	0.000458571	602.6	0.000454899	602.6	0.000445672	602.6	0.000664858	602.6	0.00052626	602.6	0.000446639	602.6	0.000510511	602.6	0.00050429	602.6	0.000578629	602.6	0.000705817	602.6	0.000495744	602.6	0.000585248
602.8	0.000446617	602.8	0.000528501	602.8	0.000566602	602.8	0.000462727	602.8	0.000454899	602.8	0.000431853	602.8	0.000626892	602.8	0.00052626	602.8	0.000448424	602.8	0.000505803	602.8	0.000492324	602.8	0.000578629	602.8	0.00068021	602.8	0.000490822	602.8	0.000615154
603	0.000437851	603	0.000525027	603	0.000642048	603	0.000462727	603	0.000455767	603	0.000431622	603	0.00055374	603	0.000524981	603	0.000446639	603	0.000499862	603	0.000488843	603	0.000574329	603	0.000679279	603	0.000482665	603	0.000620022
603.2	0.00043159	603.2	0.000528501	603.2	0.000657744	603.2	0.000456305	603.2	0.000455767	603.2	0.000430932	603.2	0.000542628	603.2	0.000518371	603.2	0.000442175	603.2	0.000506588	603.2	0.000476878	603.2	0.000574329	603.2	0.000665777	603.2	0.000468602	603.2	0.000621065
603.4	0.000428251	603.4	0.000524531	603.4	0.000598502	603.4	0.000456305	603.4	0.000454899	603.4	0.000409512	603.4	0.000542628	603.4	0.000516665	603.4	0.000435926	603.4	0.000506812	603.4	0.000476878	603.4	0.000574329	603.4	0.000581973	603.4	0.000466211	603.4	0.000620022
603.6	0.000407799	603.6	0.000509643	603.6	0.000649137	603.6	0.000456305	603.6	0.000427987	603.6	0.000405366	603.6	0.000542628	603.6	0.00049854	603.6	0.000427595	603.6	0.000501431	603.6	0.000475137	603.6	0.000574329	603.6	0.000581973	603.6	0.000462414	603.6	0.000620022
603.8	0.000405712	603.8	0.000509643	603.8	0.000635465	603.8	0.000456305	603.8	0.000427987	603.8	0.000405366	603.8	0.000543554	603.8	0.000487025	603.8	0.000403195	603.8	0.000494032	603.8	0.000472962	603.8	0.000542242	603.8	0.000581973	603.8	0.000457351	603.8	0.000615154
604	0.00040279	604	0.000499221	604	0.000646099	604	0.000445351	604	0.000427987	604	0.000405366	604	0.000543554	604	0.000472739	604	0.000403195	604	0.000479571	604	0.000468393	604	0.000541717	604	0.000581973	604	0.000457351	604	0.000599505
604.2	0.000389433	604.2	0.000492769	604.2	0.000777242	604.2	0.000410977	604.2	0.000427987	604.2	0.000402141	604.2	0.000542628	604.2	0.000472739	604.2	0.000403195	604.2	0.00047576	604.2	0.000459691	604.2	0.000532909	604.2	0.000581973	604.2	0.000439209	604.2	0.000596723
604.4	0.000382755	604.4	0.000449593	604.4	0.000676986	604.4	0.000380947	604.4	0.000427987	604.4	0.000400299	604.4	0.000542628	604.4	0.000470393	604.4	0.000394863	604.4	0.000469258	604.4	0.000456863	604.4	0.000504911	604.4	0.00059594	604.4	0.000438083	604.4	0.000589073
604.6	0.00035938	604.6	0.000443142	604.6	0.00079142	604.6	0.00037868	604.6	0.000427987	604.6	0.000396153	604.6	0.000543554	604.6	0.000463143	604.6	0.000394863	604.6	0.000465334	604.6	0.00045534	604.6	0.000490125	604.6	0.000606649	604.6	0.000435974	604.6	0.000575859
604.8	0.00035145	604.8	0.000435697	604.8	0.000602046	604.8	0.00037868	604.8	0.000413229	604.8	0.000396153	604.8	0.000526886	604.8	0.000463143	604.8	0.000393078	604.8	0.000460962	604.8	0.000455122	604.8	0.000487189	604.8	0.000606649	604.8	0.000435974	604.8	0.000565427
605	0.00035938	605	0.000435697	605	0.000640022	605	0.00037868	605	0.00042191	605	0.000383485	605	0.000520404	605	0.000463143	605	0.000391292	605	0.000457151	605	0.000442287	605	0.000480478	605	0.00059594	605	0.00043288	605	0.000558819
605.2	0.000356458	605.2	0.000417335	605.2	0.000571159	605.2	0.00037868	605.2	0.00042191	605.2	0.000377497	605.2	0.000514848	605.2	0.000443313	605.2	0.000393078	605.2	0.000442354	605.2	0.000429016	605.2	0.000480478	605.2	0.00059594	605.2	0.000435974	605.2	0.000554647
605.4	0.00035145	605.4	0.000415846	605.4	0.000474953	605.4	0.00038378	605.4	0.000428855	605.4	0.000369666	605.4	0.000514848	605.4	0.00042135	605.4	0.000393078	605.4	0.00044695	605.4	0.00042684	605.4	0.000480478	605.4	0.000570334	605.4	0.000432599	605.4	0.000554647
605.6	0.00035145	605.6	0.000412869	605.6	0.000573185	605.6	0.000397756	605.6	0.000430591	605.6	0.000369666	605.6	0.000514848	605.6	0.000407276	605.6	0.000391292	605.6	0.000432376	605.6	0.000429016	605.6	0.000477437	605.6	0.000546589	605.6	0.00042852	605.6	0.000549778
605.8	0.00035145	605.8	0.000415846	605.8	0.000679517	605.8	0.000397756	605.8	0.000428855	605.8	0.000363217	605.8	0.000459289	605.8	0.000407276	605.8	0.000391292	605.8	0.000431816	605.8	0.000429016	605.8	0.000477437	605.8	0.000544261	605.8	0.00042852	605.8	0.000531348
606	0.00035145	606	0.000415846	606	0.000633946	606	0.000397756	606	0.000430591	606	0.000354465	606	0.000445399	606	0.000404291	606	0.000391292	606	0.000417467	606	0.000429016	606	0.000474501	606	0.000544261	606	0.00042852	606	0.000527523
606.2	0.000345606	606.2	0.000412869	606.2	0.000577235	606.2	0.00038378	606.2	0.000430591	606.2	0.000354465	606.2	0.000428731	606.2	0.000404291	606.2	0.00038058	606.2	0.000413207	606.2	0.00042684	606.2	0.000471145	606.2	0.000544261	606.2	0.0004108	606.2	0.000527523
606.4	0.000343519	606.4	0.000411876	606.4	0.000551918	606.4	0.000383591	606.4	0.000430591	606.4	0.00035124	606.4	0.000415768	606.4	0.000408556	606.4	0.000378497	606.4	0.000414552	606.4	0.00042684	606.4	0.000463805	606.4	0.000544261	606.4	0.0004108	606.4	0.000503529
606.6	0.000336841	606.6	0.000403439	606.6	0.000433433	606.6	0.000351294	606.6	0.000430591	606.6	0.00035124	606.6	0.000387062	606.6	0.000408556	606.6	0.000366	606.6	0.000417915	606.6	0.000425318	606.6	0.000453948	606.6	0.000542399	606.6	0.000407847	606.6	0.000502138
606.8	0.000336841	606.8	0.000369196	606.8	0.000606603	606.8	0.000347139	606.8	0.000422778	606.8	0.00035101	606.8	0.000377802	606.8	0.000408556	606.8	0.000333863	606.8	0.000408162	606.8	0.000425318	606.8	0.000450907	606.8	0.000542399	606.8	0.000407143	606.8	0.000460757
607	0.00032891	607	0.000369196	607	0.00057521	607	0.000344117	607	0.000392393	607	0.000349628	607	0.000377802	607	0.000408556	607	0.000333863	607	0.000399419	607	0.000390509	607	0.000443566	607	0.000542399	607	0.000403206	607	0.000460757
607.2	0.000325988	607.2	0.000369196	607.2	0.000583312	607.2	0.000340151	607.2	0.000392393	607.2	0.000349628	607.2	0.000375024	607.2	0.000401945	607.2	0.000333863	607.2	0.000401773	607.2	0.000365925	607.2	0.000443147	607.2	0.000501894	607.2	0.000403206	607.2	0.000460757
607.4	0.000317223	607.4	0.000369196	607.4	0.000547361	607.4	0.000338263	607.4	0.000365482	607.4	0.000346634	607.4	0.000334281	607.4	0.000401945	607.4	0.000333863	607.4	0.000397513	607.4	0.000357223	607.4	0.000440316	607.4	0.000501894	607.4	0.000379438	607.4	0.000460757
607.6	0.000317223	607.6	0.000369692	607.6	0.000548374	607.6	0.000320887	607.6	0.000328152	607.6	0.00030103	607.6	0.000302797	607.6	0.000396401	607.6	0.000335648	607.6	0.00039684	607.6	0.000347651	607.6	0.000435702	607.6	0.000501894	607.6	0.00037761	607.6	0.000460757
607.8	0.000317223	607.8	0.000369692	607.8	0.000482042	607.8	0.000319753	607.8	0.000328152	607.8	0.000299648	607.8	0.000334281	607.8	0.000393842	607.8	0.000376117	607.8	0.000386639	607.8	0.000340472	607.8	0.000396064	607.8	0.000501894	607.8	0.000363546	607.8	0.000481969
608	0.000317223	608	0.000377137	608	0.00048508	608	0.000319753	608	0.000308185	608	0.000299648	608	0.000375024	608	0.00039171	608	0.00039159	608	0.000383612	608	0.000340472	608	0.000383585	608	0.00050329	608	0.000363546	608	0.000481969
608.2	0.000317223	608.2	0.000377137	608.2	0.000435965	608.2	0.000319753	608.2	0.000289954	608.2	0.000299648	608.2	0.000364838	608.2	0.000383394	608.2	0.000397541	608.2	0.000378904	608.2	0.000340472	608.2	0.000371421	608.2	0.00050329	608.2	0.000370859	608.2	0.000481969
608.4	0.000319727	608.4	0.000369692	608.4	0.000577235	608.4	0.000319753	608.4	0.000268251	608.4	0.00030103	608.4	0.000334281	608.4	0.000385526	608.4	0.000397541	608.4	0.00037442	608.4	0.000340472	608.4	0.000369534	608.4	0.00050329	608.4	0.000370859	608.4	0.000499008
608.6	0.000319727	608.6	0.000360759	608.6	0.000577235	608.6	0.000322586	608.6	0.00024568	608.6	0.00030103	608.6	0.000347245	608.6	0.000385526	608.6	0.000397541	608.6	0.000374756	608.6	0.000343952	608.6	0.000358733	608.6	0.00050329	608.6	0.000370859	608.6	0.000481969
608.8	0.000319727	608.8	0.000360759	608.8	0.00047546	608.8	0.000322586	608.8	0.000236999	608.8	0.000311164	608.8	0.000347245	608.8	0.000385526	608.8	0.00039159	608.8	0.000370496	608.8	0.000346563	608.8	0.000358733	608.8	0.000492582	608.8	0.000370859	608.8	0.000496574
609	0.000301362	609	0.000360759	609	0.000499764	609	0.000325797	609	0.000234394	609	0.000311164	609	0.000354653	609	0.000377423	609	0.000376117	609	0.000365115	609	0.000351567	609	0.000358628	609	0.000474424	609	0.000370859	609	0.000465973
609.2	0.000295101	609.2	0.00036473	609.2	0.000466345	609.2	0.000325797	609.2	0.000232658	609.2	0.000311164	609.2	0.000354653	609.2	0.000381475	609.2	0.000373736	609.2	0.000357717	609.2	0.000351567	609.2	0.000358628	609.2	0.000473493	609.2	0.000370859	609.2	0.000463539
609.4	0.000295101	609.4	0.00036473	609.4	0.000520018	609.4	0.000325797	609.4	0.000232658	609.4	0.000311164	609.4	0.000354653	609.4	0.000381475	609.4	0.00036719	609.4	0.000352896	609.4	0.000351567	609.4	0.000358628	609.4	0.000446955	609.4	0.000369875	609.4	0.000463539
609.6	0.000295101	609.6	0.00036473	609.6	0.000467864	609.6	0.000316354	609.6	0.000208351	609.6	0.000311164	609.6	0.000354653	609.6	0.000381475	609.6	0.000366595	609.6	0.000339444	609.6	0.000351567	609.6	0.000358628	609.6	0.000442299	609.6	0.000362983	609.6	0.000463539
609.8	0.000295101	609.8	0.00036473	609.8	0.000473434	609.8	0.000307477	609.8	0.000203142	609.8	0.000311164	609.8	0.000485217	609.8	0.000381475	609.8	0.000366595	609.8	0.000336529	609.8	0.000344605	609.8	0.000358628	609.8	0.00043904	609.8	0.000347935	609.8	0.000439197
610	0.000318893	610	0.00036473	610	0.000385836	610	0.000302	610	0.000208351	610	0.000314849	610	0.000485217	610	0.000377423	610	0.000326127	610	0.000327561	610	0.000339166	610	0.000358628	610	0.00043904	610	0.000347935	610	0.000407204
610.2	0.000318893	610.2	0.000369196	610.2	0.000405584	610.2	0.000285002	610.2	0.000208351	610.2	0.000314849	610.2	0.000485217	610.2	0.000376357	610.2	0.000326127	610.2	0.000330812	610.2	0.000332422	610.2	0.000340172	610.2	0.00043904	610.2	0.000347935	610.2	0.000404423
610.4	0.000322232	610.4	0.000359271	610.4	0.000506347	610.4	0.000282735	610.4	0.000252625	610.4	0.000314849	610.4	0.000485217	610.4	0.000373372	610.4	0.000314819	610.4	0.000329691	610.4	0.000323285	610.4	0.000340068	610.4	0.00043904	610.4	0.000347935	610.4	0.000373821
610.6	0.000322232	610.6	0.000346367	610.6	0.000395963	610.6	0.000280091	610.6	0.000262174	610.6	0.000314849	610.6	0.000461141	610.6	0.000358659	610.6	0.000309166	610.6	0.000322068	610.6	0.000322415	610.6	0.000337446	610.6	0.000447421	610.6	0.000347935	610.6	0.000368258
610.8	0.000318893	610.8	0.000334953	610.8	0.000489131	610.8	0.000261771	610.8	0.000295163	610.8	0.000314849	610.8	0.00042225	610.8	0.000332431	610.8	0.000306488	610.8	0.000318705	610.8	0.000321327	610.8	0.000337446	610.8	0.000448352	610.8	0.00033795	610.8	0.000350175
611	0.000298023	611	0.00032602	611	0.000440522	611	0.00025025	611	0.000295163	611	0.000314849	611	0.000400026	611	0.00031452	611	0.000309166	611	0.000315006	611	0.000318064	611	0.000340068	611	0.000448352	611	0.00033795	611	0.000337309
611.2	0.000298023	611.2	0.000334953	611.2	0.000452168	611.2	0.000228153	611.2	0.000295163	611.2	0.000314849	611.2	0.000384284	611.2	0.000308549	611.2	0.000314819	611.2	0.000314221	611.2	0.000318064	611.2	0.000340172	611.2	0.000448352	611.2	0.000326277	611.2	0.000313662
611.4	0.000293014	611.4	0.000341901	611.4	0.000446092	611.4	0.000228153	611.4	0.000279537	611.4	0.000314849	611.4	0.000384284	611.4	0.000291277	611.4	0.000314819	611.4	0.000313997	611.4	0.000309797	611.4	0.000352441	611.4	0.000448352	611.4	0.000315448	611.4	0.000313662
611.6	0.000291762	611.6	0.000325027	611.6	0.000525082	611.6	0.000228153	611.6	0.00027346	611.6	0.000314849	611.6	0.000384284	611.6	0.000291277	611.6	0.000314819	611.6	0.000310522	611.6	0.000307186	611.6	0.000352441	611.6	0.000438575	611.6	0.000306729	611.6	0.000313662
611.8	0.000291762	611.8	0.000309146	611.8	0.00046432	611.8	0.000228153	611.8	0.00027346	611.8	0.000313698	611.8	0.000373172	611.8	0.000291277	611.8	0.000313629	611.8	0.000307944	611.8	0.000296743	611.8	0.000352441	611.8	0.000431591	611.8	0.000286196	611.8	0.000313662
612	0.000291762	612	0.000309146	612	0.000423812	612	0.000228719	612	0.000258702	612	0.000299418	612	0.000373172	612	0.000291277	612	0.000313629	612	0.000306598	612	0.00029435	612	0.000352441	612	0.00041483	612	0.000261303	612	0.000332788
612.2	0.000291762	612.2	0.000317087	612.2	0.000346341	612.2	0.000228719	612.2	0.000253493	612.2	0.000298036	612.2	0.00037132	612.2	0.000301939	612.2	0.000313629	612.2	0.000307944	612.2	0.000274988	612.2	0.000348247	612.2	0.00037805	612.2	0.000257506	612.2	0.000332788
612.4	0.000291762	612.4	0.000317087	612.4	0.000333176	612.4	0.000228719	612.4	0.000246548	612.4	0.000295502	612.4	0.00036669	612.4	0.000301939	612.4	0.000301131	612.4	0.000300096	612.4	0.000273683	612.4	0.000339438	612.4	0.000357099	612.4	0.000257365	612.4	0.000332788
612.6	0.000275901	612.6	0.000309146	612.6	0.000495714	612.6	0.000240807	612.6	0.000236131	612.6	0.00028675	612.6	0.000362986	612.6	0.000301939	612.6	0.00028417	612.6	0.000292249	612.6	0.000273683	612.6	0.000321088	612.6	0.00034639	612.6	0.000257365	612.6	0.000332788
612.8	0.00023583	612.8	0.000297236	612.8	0.000308365	612.8	0.000248739	612.8	0.000214427	612.8	0.000239995	612.8	0.000329651	612.8	0.000301939	612.8	0.000277922	612.8	0.000284514	612.8	0.000273683	612.8	0.000301688	612.8	0.00034639	612.8	0.000257365	612.8	0.000332788
613	0.000232074	613	0.000297236	613	0.00042685	613	0.000240807	613	0.000197065	613	0.00023654	613	0.000325021	613	0.000301939	613	0.000277922	613	0.000287093	613	0.000273683	613	0.000292985	613	0.00034639	613	0.000257365	613	0.000324442
613.2	0.000212873	613.2	0.000297236	613.2	0.000340265	613.2	0.000237596	613.2	0.000197065	613.2	0.000224563	613.2	0.000288908	613.2	0.000303005	613.2	0.000277922	613.2	0.000277452	613.2	0.0002739	613.2	0.000289734	613.2	0.00034639	613.2	0.000257365	613.2	0.000324442
613.4	0.000212873	613.4	0.000297236	613.4	0.000345329	613.4	0.000229663	613.4	0.000197065	613.4	0.000216733	613.4	0.000287982	613.4	0.000303431	613.4	0.000259175	613.4	0.000276331	613.4	0.0002739	613.4	0.000289734	613.4	0.00034639	613.4	0.000257365	613.4	0.000324442
613.6	0.000212873	613.6	0.000297236	613.6	0.000391406	613.6	0.000229663	613.6	0.000234394	613.6	0.000216733	613.6	0.00023057	613.6	0.000300659	613.6	0.000254712	613.6	0.000277228	613.6	0.0002739	613.6	0.000281974	613.6	0.000350581	613.6	0.000257365	613.6	0.00033244
613.8	0.000204525	613.8	0.000318576	613.8	0.000416723	613.8	0.000229663	613.8	0.000234394	613.8	0.000216733	613.8	0.000221311	613.8	0.000289145	613.8	0.000254712	613.8	0.00027151	613.8	0.0002739	613.8	0.000281974	613.8	0.000350581	613.8	0.000259756	613.8	0.00033244
614	0.000204525	614	0.000323539	614	0.000427863	614	0.000208699	614	0.00028735	614	0.000219727	614	0.000221311	614	0.000289145	614	0.000267805	614	0.000272183	614	0.000247794	614	0.000289734	614	0.000350581	614	0.000279586	614	0.00033244
614.2	0.000217882	614.2	0.000350338	614.2	0.000452674	614.2	0.000208133	614.2	0.000307317	614.2	0.000222951	614.2	0.000221311	614.2	0.000289145	614.2	0.000267805	614.2	0.000268147	614.2	0.00028282	614.2	0.000290782	614.2	0.000328233	614.2	0.000279586	614.2	0.000326181
614.4	0.000217882	614.4	0.000350338	614.4	0.000395457	614.4	0.000208133	614.4	0.000342042	614.4	0.000224563	614.4	0.000216681	614.4	0.000274432	614.4	0.000267805	614.4	0.000264	614.4	0.00028282	614.4	0.000291621	614.4	0.000328233	614.4	0.000281414	614.4	0.000326181
614.6	0.000217882	614.6	0.000350338	614.6	0.000336721	614.6	0.000208133	614.6	0.000342042	614.6	0.000244832	614.6	0.000221311	614.6	0.000270807	614.6	0.000260663	614.6	0.00026243	614.6	0.000263675	614.6	0.000291621	614.6	0.000325905	614.6	0.000281414	614.6	0.000322008
614.8	0.000215378	614.8	0.000350338	614.8	0.000354949	614.8	0.000208133	614.8	0.000400207	614.8	0.000244832	614.8	0.00024909	614.8	0.000270807	614.8	0.000260663	614.8	0.00025391	614.8	0.000263675	614.8	0.000290782	614.8	0.000328233	614.8	0.000279586	614.8	0.000296971
615	0.000212456	615	0.000340908	615	0.000430395	615	0.00020681	615	0.000400207	615	0.000244832	615	0.000288908	615	0.000270807	615	0.000260663	615	0.000247857	615	0.000269549	615	0.000290782	615	0.000318921	615	0.000281414	615	0.000287929
615.2	0.000215378	615.2	0.000302695	615.2	0.000492675	615.2	0.00020681	615.2	0.000342042	615.2	0.000244832	615.2	0.000355579	615.2	0.000270807	615.2	0.000255605	615.2	0.000240234	615.2	0.000269549	615.2	0.000284805	615.2	0.000318921	615.2	0.000279445	615.2	0.000287929
615.4	0.000215378	615.4	0.000302695	615.4	0.000437484	615.4	0.00020681	615.4	0.000342042	615.4	0.00023631	615.4	0.000355579	615.4	0.00027102	615.4	0.000254414	615.4	0.00024214	615.4	0.000269549	615.4	0.000280716	615.4	0.000357099	615.4	0.000278039	615.4	0.000287929
615.6	0.000215378	615.6	0.000302695	615.6	0.000459763	615.6	0.000201522	615.6	0.000342042	615.6	0.000228018	615.6	0.000355579	615.6	0.000280615	615.6	0.00024757	615.6	0.000239786	615.6	0.000266721	615.6	0.000270334	615.6	0.000358495	615.6	0.000277758	615.6	0.000287929
615.8	0.000227065	615.8	0.000302695	615.8	0.000423306	615.8	0.000193967	615.8	0.000315998	615.8	0.000227558	615.8	0.000355579	615.8	0.000288505	615.8	0.000235668	615.8	0.000241355	615.8	0.000263675	615.8	0.000262784	615.8	0.000357099	615.8	0.000271991	615.8	0.000280627
616	0.000227065	616	0.000325524	616	0.000418242	616	0.000180369	616	0.000315998	616	0.000207059	616	0.000327799	616	0.000288505	616	0.000232395	616	0.000232947	616	0.000258671	616	0.000244748	616	0.000357099	616	0.000258209	616	0.000291407
616.2	0.000227065	616.2	0.000325524	616.2	0.000367101	616.2	0.000179802	616.2	0.000308185	616.2	0.00020084	616.2	0.000325021	616.2	0.000288505	616.2	0.000229717	616.2	0.000234517	616.2	0.00025345	616.2	0.000244748	616.2	0.000347787	616.2	0.000248786	616.2	0.000291755
616.4	0.000229987	616.4	0.000325524	616.4	0.000384317	616.4	0.000176969	616.4	0.000307317	616.4	0.000194391	616.4	0.000238904	616.4	0.000288505	616.4	0.000228824	616.4	0.000231266	616.4	0.00025258	616.4	0.000244748	616.4	0.000347787	616.4	0.000242317	616.4	0.000291755
616.6	0.000229987	616.6	0.000325524	616.6	0.00040052	616.6	0.000159405	616.6	0.00028735	616.6	0.000194391	616.6	0.000228719	616.6	0.000284027	616.6	0.00022198	616.6	0.0002288	616.6	0.00025171	616.6	0.000244748	616.6	0.00033801	616.6	0.000241051	616.6	0.000291755
616.8	0.000227065	616.8	0.00031262	616.8	0.000343809	616.8	0.000158838	616.8	0.000247416	616.8	0.000194391	616.8	0.000228719	616.8	0.00026974	616.8	0.000219005	616.8	0.000232947	616.8	0.00025171	616.8	0.000244433	616.8	0.00033801	616.8	0.000236551	616.8	0.000291755
617	0.0002567	617	0.000308154	617	0.000264313	617	0.000158838	617	0.000242207	617	0.000194391	617	0.000226867	617	0.000266116	617	0.000205019	617	0.000229024	617	0.000246053	617	0.000244433	617	0.000328698	617	0.000236551	617	0.00029558
617.2	0.0002567	617.2	0.000289295	617.2	0.000366595	617.2	0.000158838	617.2	0.000184911	617.2	0.000194391	617.2	0.000223163	617.2	0.000250549	617.2	0.000205019	617.2	0.000227454	617.2	0.000246053	617.2	0.000244433	617.2	0.000328698	617.2	0.000229238	617.2	0.000304273
617.4	0.0002567	617.4	0.000289295	617.4	0.000334189	617.4	0.000158838	617.4	0.00017623	617.4	0.000194391	617.4	0.000175011	617.4	0.000242873	617.4	0.000199366	617.4	0.000220168	617.4	0.000246053	617.4	0.000244433	617.4	0.000318921	617.4	0.000216299	617.4	0.000304621
617.6	0.0002567	617.6	0.000289295	617.6	0.00042685	617.6	0.000164693	617.6	0.000140637	617.6	0.00017228	617.6	0.000175011	617.6	0.000231572	617.6	0.000193414	617.6	0.000216244	617.6	0.000247576	617.6	0.000233423	617.6	0.000318921	617.6	0.000208283	617.6	0.000306012
617.8	0.000218717	617.8	0.000289295	617.8	0.000369633	617.8	0.000166015	617.8	0.000140637	617.8	0.00017228	617.8	0.000175011	617.8	0.000227094	617.8	0.000192522	617.8	0.000209182	617.8	0.000247576	617.8	0.000232269	617.8	0.00033801	617.8	0.000208002	617.8	0.00031088
618	0.000182821	618	0.000289295	618	0.000341784	618	0.00016677	618	0.000140637	618	0.000163989	618	0.000168529	618	0.0002143	618	0.000188058	618	0.000199429	618	0.000247576	618	0.000226292	618	0.000354305	618	0.000203923	618	0.00032479
618.2	0.000182821	618.2	0.000289295	618.2	0.00030077	618.2	0.000169603	618.2	0.000140637	618.2	0.000163989	618.2	0.000148158	618.2	0.000209395	618.2	0.000188058	618.2	0.000197411	618.2	0.00024105	618.2	0.000219896	618.2	0.000354305	618.2	0.000203923	618.2	0.00032479
618.4	0.000182821	618.4	0.000292273	618.4	0.000356974	618.4	0.000173192	618.4	0.000177098	618.4	0.000163298	618.4	0.000148158	618.4	0.000209395	618.4	0.000188058	618.4	0.000201223	618.4	0.00024105	618.4	0.000206264	618.4	0.000357564	618.4	0.000201814	618.4	0.00031088
618.6	0.000182403	618.6	0.000292273	618.6	0.000212666	618.6	0.000173192	618.6	0.000177098	618.6	0.000163298	618.6	0.000168529	618.6	0.000200866	618.6	0.000188058	618.6	0.000201335	618.6	0.000238439	618.6	0.000206264	618.6	0.000357564	618.6	0.000198579	618.6	0.00031088
618.8	0.000182403	618.8	0.000289295	618.8	0.000345329	618.8	0.000171303	618.8	0.000177098	618.8	0.000162377	618.8	0.000175011	618.8	0.000200866	618.8	0.000188058	618.8	0.000196626	618.8	0.000211027	618.8	0.000205005	618.8	0.000357564	618.8	0.000198579	618.8	0.000295927
619	0.000182403	619	0.000278377	619	0.000301783	619	0.000171303	619	0.000188384	619	0.000160995	619	0.000206495	619	0.000200866	619	0.000188058	619	0.000193263	619	0.000203848	619	0.000197665	619	0.000354305	619	0.000198157	619	0.000286191
619.2	0.000182403	619.2	0.000277385	619.2	0.000273934	619.2	0.000179991	619.2	0.000229186	619.2	0.000160995	619.2	0.000248164	619.2	0.000209182	619.2	0.000188356	619.2	0.00018934	619.2	0.000200149	619.2	0.000195673	619.2	0.0003138	619.2	0.000198157	619.2	0.000286191
619.4	0.000182403	619.4	0.000275896	619.4	0.000296719	619.4	0.000179991	619.4	0.000188384	619.4	0.00015731	619.4	0.000284278	619.4	0.00021302	619.4	0.000188356	619.4	0.000184744	619.4	0.000196886	619.4	0.000194204	619.4	0.000311938	619.4	0.000198157	619.4	0.000286191
619.6	0.000156525	619.6	0.000274407	619.6	0.000230894	619.6	0.00017678	619.6	0.000185779	619.6	0.0001504	619.6	0.000301871	619.6	0.00021302	619.6	0.000188356	619.6	0.000182502	619.6	0.000177959	619.6	0.000193366	619.6	0.000271432	619.6	0.000193797	619.6	0.000295927
619.8	0.000151516	619.8	0.000262	619.8	0.000316973	619.8	0.000171303	619.8	0.000185779	619.8	0.0001504	619.8	0.000304649	619.8	0.000211314	619.8	0.000188356	619.8	0.000175663	619.8	0.000177959	619.8	0.000193366	619.8	0.000271432	619.8	0.000192391	619.8	0.000295927
620	0.000149011	620	0.000253563	620	0.000338746	620	0.00016356	620	0.000185779	620	0.000147866	620	0.000312983	620	0.000211314	620	0.000176156	620	0.00017443	620	0.000177959	620	0.000193366	620	0.000271432	620	0.000193797	620	0.000272281
620.2	0.00014442	620.2	0.000250586	620.2	0.000322037	620.2	0.000149772	620.2	0.000185779	620.2	0.000147866	620.2	0.000304649	620.2	0.000211314	620.2	0.000159493	620.2	0.000180484	620.2	0.000176001	620.2	0.000193366	620.2	0.000271432	620.2	0.000193797	620.2	0.000272281
620.4	0.00014442	620.4	0.000250586	620.4	0.000340265	620.4	0.000142784	620.4	0.000182307	620.4	0.0001504	620.4	0.000301871	620.4	0.000197454	620.4	0.000159493	620.4	0.000174879	620.4	0.000176001	620.4	0.000196616	620.4	0.000282606	620.4	0.000193797	620.4	0.000285495
620.6	0.000137324	620.6	0.000250586	620.6	0.000284061	620.6	0.000142784	620.6	0.000182307	620.6	0.000154085	620.6	0.000301871	620.6	0.000197454	620.6	0.000159493	620.6	0.000175776	620.6	0.0001921	620.6	0.000196616	620.6	0.000282606	620.6	0.000196188	620.6	0.000285495
620.8	0.000123133	620.8	0.000250586	620.8	0.00027444	620.8	0.00014184	620.8	0.000182307	620.8	0.000154085	620.8	0.000299093	620.8	0.000192337	620.8	0.000163361	620.8	0.000179027	620.8	0.000194493	620.8	0.000199238	620.8	0.000300764	620.8	0.000201954	620.8	0.000285495
621	0.000123133	621	0.000250586	621	0.000298745	621	0.00014184	621	0.000182307	621	0.000154085	621	0.000279648	621	0.000190631	621	0.000176156	621	0.000178914	621	0.000195363	621	0.000205005	621	0.000300764	621	0.000202376	621	0.000272281
621.2	0.00012188	621.2	0.000250586	621.2	0.000295707	621.2	0.000142784	621.2	0.000190988	621.2	0.000149709	621.2	0.000233348	621.2	0.000186366	621.2	0.000180322	621.2	0.000170507	621.2	0.000195363	621.2	0.000205005	621.2	0.000300764	621.2	0.000202376	621.2	0.000267413
621.4	0.000123133	621.4	0.000256045	621.4	0.000290643	621.4	0.000142784	621.4	0.000198801	621.4	0.000149709	621.4	0.000202791	621.4	0.000190631	621.4	0.000180322	621.4	0.000166247	621.4	0.000195363	621.4	0.000205005	621.4	0.000288193	621.4	0.000201954	621.4	0.000267413
621.6	0.000138994	621.6	0.000256045	621.6	0.000252667	621.6	0.00014354	621.6	0.000211823	621.6	0.000149479	621.6	0.00013149	621.6	0.000190631	621.6	0.000180322	621.6	0.000160978	621.6	0.000195363	621.6	0.000195043	621.6	0.000272829	621.6	0.000196188	621.6	0.000261849
621.8	0.000138994	621.8	0.000256045	621.8	0.00039647	621.8	0.000150339	621.8	0.000241339	621.8	0.000149018	621.8	0.00012686	621.8	0.000190631	621.8	0.000180322	621.8	0.000162884	621.8	0.000186661	621.8	0.000189276	621.8	0.000244429	621.8	0.000176077	621.8	0.000261153
622	0.000138994	622	0.000256045	622	0.000370646	622	0.000150339	622	0.000277801	622	0.000149018	622	8.88947e-05	622	0.000190631	622	0.000175263	622	0.000162323	622	0.000186661	622	0.00018655	622	0.000244429	622	0.000170311	622	0.000253155
622.2	0.00014442	622.2	0.000256045	622.2	0.000330138	622.2	0.000150339	622.2	0.000282141	622.2	0.000149018	622.2	8.88947e-05	622.2	0.00019255	622.2	0.000151756	622.2	0.000161763	622.2	0.000181005	622.2	0.000176378	622.2	0.000244429	622.2	0.000167498	622.2	0.000247939
622.4	0.00014442	622.4	0.000256045	622.4	0.000345329	622.4	0.000145051	622.4	0.000309053	622.4	0.000149018	622.4	8.88947e-05	622.4	0.00019255	622.4	0.000151756	622.4	0.000160418	622.4	0.000179699	622.4	0.000176378	622.4	0.000242566	622.4	0.000167498	622.4	0.000238898
622.6	0.00014442	622.6	0.000256045	622.6	0.000278491	622.6	0.00013674	622.6	0.000314262	622.6	0.000149939	622.6	8.88947e-05	622.6	0.00019255	622.6	0.000151756	622.6	0.000155261	622.6	0.000171432	622.6	0.000171764	622.6	0.000232324	622.6	0.000161592	622.6	0.000230204
622.8	0.00014442	622.8	0.000254556	622.8	0.000233932	622.8	0.000131074	622.8	0.000314262	622.8	0.000152243	622.8	0.000139824	622.8	0.000187219	622.8	0.000151756	622.8	0.000155149	622.8	0.000176436	622.8	0.000171764	622.8	0.000242566	622.8	0.000155544	622.8	0.00022325
623	0.00014442	623	0.000258526	623	0.0002314	623	0.000129752	623	0.000314262	623	0.000152243	623	0.000194457	623	0.000184874	623	0.000151458	623	0.000151562	623	0.000176436	623	0.000171554	623	0.000242566	623	0.000155544	623	0.000212122
623.2	0.00014442	623.2	0.000258526	623.2	0.000274946	623.2	0.000128997	623.2	0.000309053	623.2	0.000152243	623.2	0.000194457	623.2	0.000176984	623.2	0.000151458	623.2	0.000151562	623.2	0.000163818	623.2	0.000170611	623.2	0.000232324	623.2	0.000161592	623.2	0.000207601
623.4	0.000146924	623.4	0.00024463	623.4	0.000187855	623.4	0.000128997	623.4	0.000308185	623.4	0.000152243	623.4	0.000194457	623.4	0.00014244	623.4	0.000151458	623.4	0.000141809	623.4	0.000157509	623.4	0.000166416	623.4	0.000230461	623.4	0.000167498	623.4	0.000207601
623.6	0.000146924	623.6	0.000231231	623.6	0.000247604	623.6	0.000128997	623.6	0.000216164	623.6	0.000152243	623.6	0.000206495	623.6	0.00013583	623.6	0.000151458	623.6	0.000135755	623.6	0.000163818	623.6	0.000150792	623.6	0.000224409	623.6	0.00016778	623.6	0.000207601
623.8	0.000149429	623.8	0.000209395	623.8	0.000252667	623.8	0.000129752	623.8	0.000193592	623.8	0.000144181	623.8	0.000202791	623.8	0.000127727	623.8	0.000139556	623.8	0.000139903	623.8	0.000163818	623.8	0.00014796	623.8	0.000224409	623.8	0.00016778	623.8	0.000211079
624	0.000152351	624	0.000233712	624	0.000310897	624	0.000129752	624	0.000193592	624	0.000134738	624	0.000194457	624	0.000127727	624	0.000131224	624	0.000140127	624	0.000163818	624	0.00014796	624	0.000178782	624	0.00017003	624	0.000211079
624.2	0.000154855	624.2	0.000233712	624.2	0.000242034	624.2	0.000129752	624.2	0.000192724	624.2	0.000134738	624.2	0.000175011	624.2	0.000123675	624.2	0.000131224	624.2	0.000133177	624.2	0.000159249	624.2	0.000150792	624.2	0.000170867	624.2	0.000176077	624.2	0.000212817
624.4	0.000169464	624.4	0.000215846	624.4	0.000251654	624.4	0.000122953	624.4	0.000183175	624.4	0.000138654	624.4	0.000175011	624.4	0.000123675	624.4	0.000131224	624.4	0.000131944	624.4	0.000150547	624.4	0.000147331	624.4	0.000169471	624.4	0.000176077	624.4	0.000212817
624.6	0.000169464	624.6	0.000209395	624.6	0.000288111	624.6	0.000122009	624.6	0.000183175	624.6	0.000138654	624.6	0.000191679	624.6	0.000127727	624.6	0.000131224	624.6	0.000134858	624.6	0.000145543	624.6	0.000143556	624.6	0.000169471	624.6	0.00017003	624.6	0.000212817
624.8	0.000169464	624.8	0.000197484	624.8	0.000291656	624.8	0.000122009	624.8	0.000183175	624.8	0.000134738	624.8	0.000191679	624.8	0.000127727	624.8	0.000131224	624.8	0.000132504	624.8	0.000142715	624.8	0.000147331	624.8	0.000169471	624.8	0.00017003	624.8	0.000212817
625	0.000169464	625	0.000171181	625	0.000191399	625	0.000122009	625	0.000179702	625	0.000138654	625	0.000183345	625	0.000127727	625	0.000131224	625	0.000130486	625	0.000140757	625	0.000151526	625	0.000177385	625	0.00015892	625	0.000231595
625.2	0.000163203	625.2	0.0001687	625.2	0.000285073	625.2	0.000122009	625.2	0.00017623	625.2	0.000138654	625.2	0.000183345	625.2	0.000124955	625.2	0.000132117	625.2	0.000127348	625.2	0.000140757	625.2	0.000151526	625.2	0.000177385	625.2	0.000139371	625.2	0.000231943
625.4	0.000161533	625.4	0.0001687	625.4	0.000255199	625.4	0.000122009	625.4	0.00017623	625.4	0.000138654	625.4	0.000191679	625.4	0.000124955	625.4	0.000136283	625.4	0.000129702	625.4	0.000138364	625.4	0.000147331	625.4	0.000195543	625.4	0.000138387	625.4	0.000231595
625.6	0.000146924	625.6	0.000162248	625.6	0.000269376	625.6	0.000128997	625.6	0.00017623	625.6	0.000129901	625.6	0.000199087	625.6	0.00012794	625.6	0.000136283	625.6	0.000126451	625.6	0.000131185	625.6	0.000147331	625.6	0.000220684	625.6	0.000138387	625.6	0.0002309
625.8	0.000139411	625.8	0.000136938	625.8	0.000289124	625.8	0.000130319	625.8	0.00011112	625.8	0.000119767	625.8	0.000216681	625.8	0.000124955	625.8	0.000136283	625.8	0.000125778	625.8	0.00013075	625.8	0.000147331	625.8	0.000223478	625.8	0.000138387	625.8	0.0002309
626	0.000130228	626	0.000139419	626	0.000352417	626	0.000130319	626	0.000110252	626	0.000117694	626	0.000226867	626	0.000120903	626	0.000136283	626	0.000120734	626	0.00013075	626	0.00015939	626	0.00023372	626	0.000138387	626	0.0002309
626.2	0.000128141	626.2	0.0001687	626.2	0.00030077	626.2	0.000130319	626.2	0.00011112	626.2	0.000117694	626.2	0.000228719	626.2	0.000120477	626.2	0.000136283	626.2	0.000120846	626.2	0.000130315	626.2	0.000147331	626.2	0.00023372	626.2	0.000140918	626.2	0.000184998
626.4	0.000126472	626.4	0.0001687	626.4	0.000245072	626.4	0.000121442	626.4	0.00011112	626.4	9.7426e-05	626.4	0.000275018	626.4	0.000119837	626.4	0.000132415	626.4	0.000118828	626.4	0.000130097	626.4	0.000141878	626.4	0.00023372	626.4	0.000141481	626.4	0.00016622
626.6	0.000130228	626.6	0.000191529	626.6	0.000238489	626.6	0.000120876	626.6	0.00011112	626.6	9.28196e-05	626.6	0.000327799	626.6	0.000119837	626.6	0.000132415	626.6	0.000120173	626.6	0.000126399	626.6	0.000138628	626.6	0.00023372	626.6	0.000142746	626.6	0.00016622
626.8	0.000126054	626.8	0.000198476	626.8	0.000251654	626.8	0.00011672	626.8	0.00011112	626.8	9.28196e-05	626.8	0.000327799	626.8	0.000119837	626.8	0.000132415	626.8	0.000120173	626.8	0.000114216	626.8	0.000135901	626.8	0.000210907	626.8	0.000150763	626.8	0.00016622
627	0.000126054	627	0.000209395	627	0.000129118	627	0.00011672	627	0.00011112	627	9.28196e-05	627	0.000324095	627	0.000119837	627	0.000132415	627	0.000119725	627	0.000114216	627	0.000138628	627	0.00020532	627	0.000150763	627	0.00016622
627.2	0.000126054	627.2	0.000213861	627.2	0.00019545	627.2	0.000116532	627.2	0.000137164	627.2	9.28196e-05	627.2	0.000324095	627.2	0.000121117	627.2	0.000132415	627.2	0.000114568	627.2	0.000114216	627.2	0.000138628	627.2	0.00020532	627.2	0.000150763	627.2	0.000166568
627.4	0.000136489	627.4	0.000239171	627.4	0.000375203	627.4	0.000104822	627.4	0.000137164	627.4	9.28196e-05	627.4	0.000275018	627.4	0.000126874	627.4	0.000136878	627.4	0.000108514	627.4	0.000105731	627.4	0.000138628	627.4	0.000201595	627.4	0.000147106	627.4	0.000166568
627.6	0.000139411	627.6	0.000239171	627.6	0.000269883	627.6	8.97123e-05	627.6	8.94171e-05	627.6	9.28196e-05	627.6	0.000250942	627.6	0.000133484	627.6	0.000136878	627.6	0.000107506	627.6	0.000105731	627.6	0.000140935	627.6	0.000201595	627.6	0.000147106	627.6	0.000177348
627.8	0.000139411	627.8	0.000239171	627.8	0.000164056	627.8	8.97123e-05	627.8	8.94171e-05	627.8	9.37409e-05	627.8	0.00024909	627.8	0.00013583	627.8	0.000136878	627.8	0.000104927	627.8	0.000101598	627.8	0.000140935	627.8	0.000201595	627.8	0.000145559	627.8	0.000178739
628	0.000136489	628	0.000215846	628	0.000206589	628	8.83902e-05	628	7.11864e-05	628	9.78866e-05	628	0.00024909	628	0.000151822	628	0.000130034	628	0.00010616	628	0.000105731	628	0.000140935	628	0.000199733	628	0.000134589	628	0.000178739
628.2	0.000136489	628.2	0.000209395	628.2	0.000198488	628.2	8.55572e-05	628.2	7.11864e-05	628.2	9.78866e-05	628.2	0.000250942	628.2	0.000154808	628.2	0.000130034	628.2	0.00010616	628.2	0.000108994	628.2	0.000140935	628.2	0.000202527	628.2	0.000125026	628.2	0.000181173
628.4	0.000125637	628.4	0.000197484	628.4	0.000266845	628.4	8.2913e-05	628.4	7.11864e-05	628.4	9.62744e-05	628.4	0.000250942	628.4	0.000154808	628.4	0.000122297	628.4	0.000105151	628.4	0.0001103	628.4	0.000134748	628.4	0.000199733	628.4	0.000125026	628.4	0.00018778
628.6	0.000116037	628.6	0.000194506	628.6	0.000283048	628.6	8.2913e-05	628.6	7.11864e-05	628.6	9.62744e-05	628.6	0.000279648	628.6	0.000153741	628.6	0.000130034	628.6	9.92101e-05	628.6	0.000108994	628.6	0.000126778	628.6	0.000193681	628.6	0.000119541	628.6	0.00018778
628.8	0.000116037	628.8	0.000183092	628.8	0.000154436	628.8	7.95134e-05	628.8	9.5494e-05	628.8	9.21286e-05	628.8	0.000279648	628.8	0.000153741	628.8	0.000130034	628.8	9.87616e-05	628.8	0.000108994	628.8	0.000119752	628.8	0.000193681	628.8	0.000115885	628.8	0.000189171
629	0.000116037	629	0.000183092	629	0.000181272	629	7.95134e-05	629	0.000146713	629	9.21286e-05	629	0.000279648	629	0.000153741	629	0.000130034	629	9.56228e-05	629	0.000106819	629	0.00011797	629	0.000186231	629	0.0001104	629	0.00018778
629.2	0.000125637	629.2	0.000183092	629.2	0.000134688	629.2	7.95134e-05	629.2	0.00014845	629.2	9.21286e-05	629.2	0.000279648	629.2	0.000137962	629.2	0.000130034	629.2	9.62954e-05	629.2	0.000106819	629.2	0.000111049	629.2	0.000178317	629.2	0.000115885	629.2	0.000189171
629.4	0.000117706	629.4	0.000189047	629.4	0.000184817	629.4	7.95134e-05	629.4	0.00014845	629.4	9.21286e-05	629.4	0.000279648	629.4	0.000118558	629.4	0.000120512	629.4	9.96585e-05	629.4	0.000101598	629.4	0.000111049	629.4	0.000159228	629.4	0.000115885	629.4	0.000189171
629.6	0.000128559	629.6	0.000194506	629.6	0.000151904	629.6	8.65015e-05	629.6	0.000150186	629.6	9.14376e-05	629.6	0.000274092	629.6	0.000118558	629.6	0.000115454	629.6	9.41655e-05	629.6	9.18077e-05	629.6	0.000111049	629.6	0.000159228	629.6	0.000119541	629.6	0.000189171
629.8	0.000132315	629.8	0.000189047	629.8	0.000185323	629.8	8.80125e-05	629.8	0.00014845	629.8	9.14376e-05	629.8	0.000274092	629.8	0.000118558	629.8	0.000115454	629.8	9.70801e-05	629.8	8.70215e-05	629.8	0.00011797	629.8	0.000159228	629.8	0.000119541	629.8	0.000189171
630	0.000138576	630	0.000183092	630	0.000127599	630	8.99012e-05	630	0.00014845	630	9.28196e-05	630	0.000274092	630	0.000118558	630	0.000101468	630	9.3605e-05	630	8.33231e-05	630	0.00011797	630	0.000163418	630	0.000115885	630	0.000189171
630.2	0.000140663	630.2	0.000183092	630.2	0.000167601	630.2	9.06566e-05	630.2	0.000138032	630.2	9.28196e-05	630.2	0.000278722	630.2	0.00012794	630.2	0.000101468	630.2	8.93451e-05	630.2	8.33231e-05	630.2	0.00011797	630.2	0.000163418	630.2	0.000117713	630.2	0.000189171
630.4	0.000140663	630.4	0.000163241	630.4	0.000207096	630.4	9.19787e-05	630.4	0.00012501	630.4	9.28196e-05	630.4	0.000278722	630.4	0.00012794	630.4	0.000101468	630.4	8.73273e-05	630.4	8.33231e-05	630.4	0.00011797	630.4	0.000163418	630.4	0.000119822	630.4	0.000193692
630.6	0.000149429	630.6	0.000148849	630.6	0.000193424	630.6	9.19787e-05	630.6	0.000116329	630.6	9.14376e-05	630.6	0.000278722	630.6	0.00012794	630.6	0.000115454	630.6	8.6991e-05	630.6	8.33231e-05	630.6	0.00011797	630.6	0.000163418	630.6	0.000117713	630.6	0.000189171
630.8	0.000149429	630.8	0.000138427	630.8	0.000193424	630.8	9.19787e-05	630.8	9.98346e-05	630.8	8.95951e-05	630.8	0.000274092	630.8	0.00012794	630.8	0.000126463	630.8	8.49731e-05	630.8	8.33231e-05	630.8	0.000116607	630.8	0.000163418	630.8	0.000119822	630.8	0.000175957
631	0.000149429	631	0.000138427	631	0.000141271	631	9.19787e-05	631	9.98346e-05	631	8.08428e-05	631	0.000278722	631	0.000123889	631	0.000126463	631	8.17222e-05	631	8.33231e-05	631	0.000115034	631	0.000163418	631	0.000119822	631	0.000175957
631.2	0.000149429	631.2	0.000138427	631.2	0.000203551	631.2	9.19787e-05	631.2	9.98346e-05	631.2	7.41635e-05	631.2	0.000270388	631.2	0.000122183	631.2	0.000126463	631.2	8.18343e-05	631.2	7.61438e-05	631.2	9.5005e-05	631.2	0.000163418	631.2	0.000117994	631.2	0.000175957
631.4	0.000105602	631.4	0.00014736	631.4	0.000193424	631.4	9.02789e-05	631.4	0.000116329	631.4	7.163e-05	631.4	0.000250942	631.4	0.000117278	631.4	0.000126463	631.4	8.01528e-05	631.4	7.61438e-05	631.4	9.5005e-05	631.4	0.000163418	631.4	0.00012151	631.4	0.000180477
631.6	0.000100176	631.6	0.00014736	631.6	0.000120511	631.6	8.10244e-05	631.6	0.000132823	631.6	7.163e-05	631.6	0.000250942	631.6	0.000117278	631.6	0.000126463	631.6	7.83591e-05	631.6	8.37582e-05	631.6	9.5005e-05	631.6	0.000184835	631.6	0.000121791	631.6	0.000180477
631.8	0.000100176	631.8	0.000138427	631.8	0.000169626	631.8	7.78136e-05	631.8	0.000132823	631.8	7.163e-05	631.8	0.000250942	631.8	0.000115786	631.8	0.000126761	631.8	8.29553e-05	631.8	7.61438e-05	631.8	9.5005e-05	631.8	0.000184835	631.8	0.000121791	631.8	0.000174566
632	0.000100176	632	0.000144878	632	0.000166082	632	7.78136e-05	632	0.000132823	632	7.163e-05	632	0.000207421	632	0.000115786	632	0.000125273	632	8.19464e-05	632	7.15752e-05	632	9.65779e-05	632	0.000189956	632	0.000121791	632	0.000170393
632.2	0.000105602	632.2	0.000144878	632.2	0.000137726	632.2	7.04478e-05	632.2	0.000132823	632.2	7.163e-05	632.2	0.000200013	632.2	9.48889e-05	632.2	0.000113966	632.2	7.91438e-05	632.2	7.09225e-05	632.2	9.65779e-05	632.2	0.000189956	632.2	0.000117994	632.2	0.000164829
632.4	0.000105602	632.4	0.000144878	632.4	0.000117979	632.4	7.59249e-05	632.4	0.000117197	632.4	7.163e-05	632.4	0.000196309	632.4	9.48889e-05	632.4	0.000118727	632.4	7.83591e-05	632.4	6.26555e-05	632.4	9.75217e-05	632.4	0.000207648	632.4	0.00011701	632.4	0.000149529
632.6	0.000107271	632.6	0.000144878	632.6	0.000275453	632.6	7.78136e-05	632.6	0.000117197	632.6	7.53151e-05	632.6	0.000196309	632.6	0.000114506	632.6	0.000118727	632.6	7.8247e-05	632.6	6.26555e-05	632.6	9.75217e-05	632.6	0.000189956	632.6	9.81644e-05	632.6	0.000133532
632.8	0.000119376	632.8	0.000144878	632.8	0.000225324	632.8	7.78136e-05	632.8	0.000109384	632.8	7.66971e-05	632.8	0.000200013	632.8	0.000114506	632.8	0.000125273	632.8	7.56687e-05	632.8	6.26555e-05	632.8	9.75217e-05	632.8	0.000189956	632.8	9.81644e-05	632.8	0.000132489
633	0.000119376	633	0.000192521	633	0.000224818	633	8.46129e-05	633	0.000100703	633	8.63706e-05	633	0.000200013	633	0.000114506	633	0.000118727	633	7.73502e-05	633	6.26555e-05	633	9.878e-05	633	0.000193681	633	9.81644e-05	633	0.000132489
633.2	0.000111028	633.2	0.000205424	633.2	0.000133676	633.2	8.46129e-05	633.2	9.72302e-05	633.2	9.1668e-05	633.2	0.000218533	633.2	0.000117918	633.2	0.000111585	633.2	7.47719e-05	633.2	8.093e-05	633.2	9.76266e-05	633.2	0.000193681	633.2	9.81644e-05	633.2	0.000130751
633.4	0.000107271	633.4	0.000225276	633.4	0.000210134	633.4	8.40462e-05	633.4	9.72302e-05	633.4	9.30499e-05	633.4	0.000218533	633.4	0.000117918	633.4	0.000111585	633.4	7.73502e-05	633.4	9.07199e-05	633.4	9.76266e-05	633.4	0.000186697	633.4	9.91489e-05	633.4	0.000130751
633.6	0.000105602	633.6	0.000226268	633.6	0.000180259	633.6	8.40462e-05	633.6	8.24721e-05	633.6	9.30499e-05	633.6	0.000218533	633.6	0.000117918	633.6	0.00011099	633.6	7.25298e-05	633.6	9.07199e-05	633.6	9.76266e-05	633.6	0.000186697	633.6	0.000102805	633.6	0.000137358
633.8	9.26625e-05	633.8	0.000226268	633.8	0.000177728	633.8	8.40462e-05	633.8	7.20546e-05	633.8	9.30499e-05	633.8	0.000218533	633.8	0.000117918	633.8	0.000109502	633.8	7.08483e-05	633.8	9.07199e-05	633.8	9.16494e-05	633.8	0.000185766	633.8	0.000104493	633.8	0.000137358
634	7.93057e-05	634	0.000226268	634	0.000193931	634	7.81913e-05	634	5.81645e-05	634	9.1668e-05	634	0.000218533	634	9.25434e-05	634	0.000109502	634	6.89426e-05	634	9.07199e-05	634	9.16494e-05	634	0.000167608	634	0.000109978	634	0.000137358
634.2	7.55492e-05	634.2	0.000214357	634.2	0.000176209	634.2	6.83702e-05	634.2	4.42745e-05	634.2	9.00557e-05	634.2	0.000205569	634.2	8.61464e-05	634.2	0.000100873	634.2	6.54674e-05	634.2	8.74566e-05	634.2	8.70355e-05	634.2	0.000146192	634.2	0.000109978	634.2	0.000137358
634.4	7.93057e-05	634.4	0.000214357	634.4	0.000200513	634.4	5.66604e-05	634.4	4.42745e-05	634.4	8.77525e-05	634.4	0.000205569	634.4	8.1242e-05	634.4	0.000100873	634.4	6.40101e-05	634.4	8.74566e-05	634.4	8.3575e-05	634.4	0.000144795	634.4	0.000109837	634.4	0.000135967
634.6	7.93057e-05	634.6	0.000200958	634.6	0.000148866	634.6	5.66604e-05	634.6	4.42745e-05	634.6	8.24551e-05	634.6	0.000205569	634.6	7.88964e-05	634.6	0.000100873	634.6	6.32254e-05	634.6	8.74566e-05	634.6	7.87514e-05	634.6	0.000144795	634.6	0.000109837	634.6	0.000137358
634.8	7.93057e-05	634.8	0.000200958	634.8	0.000234439	634.8	5.66604e-05	634.8	7.20546e-05	634.8	7.76183e-05	634.8	0.000218533	634.8	6.71686e-05	634.8	0.000100873	634.8	6.32254e-05	634.8	8.74566e-05	634.8	7.87514e-05	634.8	0.000144795	634.8	0.000109837	634.8	0.00014014
635	8.22275e-05	635	0.000200958	635	0.000258237	635	5.51494e-05	635	9.5494e-05	635	7.76183e-05	635	0.000218533	635	6.69553e-05	635	0.000114561	635	6.30012e-05	635	8.31055e-05	635	7.85417e-05	635	0.000144795	635	0.000109837	635	0.00014014
635.2	8.22275e-05	635.2	0.000191032	635.2	0.000158993	635.2	5.1561e-05	635.2	9.5494e-05	635.2	7.76183e-05	635.2	0.000218533	635.2	6.69553e-05	635.2	0.000114561	635.2	6.0647e-05	635.2	9.09375e-05	635.2	7.65493e-05	635.2	0.000161556	635.2	9.8727e-05	635.2	0.000139444
635.4	8.64015e-05	635.4	0.000191032	635.4	0.000144815	635.4	5.02389e-05	635.4	9.5494e-05	635.4	8.29157e-05	635.4	0.000205569	635.4	6.69553e-05	635.4	0.000114561	635.4	6.01986e-05	635.4	0.00010138	635.4	7.34034e-05	635.4	0.000161556	635.4	8.62103e-05	635.4	0.00014014
635.6	9.51669e-05	635.6	0.000191032	635.6	0.000136714	635.6	5.02389e-05	635.6	9.5494e-05	635.6	8.13035e-05	635.6	0.000190753	635.6	6.69553e-05	635.6	0.000114561	635.6	6.17681e-05	635.6	0.00010138	635.6	7.34034e-05	635.6	0.000161556	635.6	8.62103e-05	635.6	0.000146399
635.8	9.76713e-05	635.8	0.000188551	635.8	0.000187855	635.8	5.96823e-05	635.8	9.02852e-05	635.8	8.13035e-05	635.8	0.000181493	635.8	7.44185e-05	635.8	0.000113668	635.8	6.53553e-05	635.8	9.1155e-05	635.8	6.42804e-05	635.8	0.000166211	635.8	8.62103e-05	635.8	0.000148833
636	0.000113532	636	0.000170685	636	0.000191399	636	5.96823e-05	636	9.02852e-05	636	8.13035e-05	636	0.000169455	636	7.71906e-05	636	0.000108015	636	6.79337e-05	636	9.1155e-05	636	6.34415e-05	636	0.000166211	636	8.21319e-05	636	0.000148833
636.2	9.76713e-05	636.2	0.000163737	636.2	0.000182791	636.2	5.42051e-05	636.2	9.02852e-05	636.2	8.13035e-05	636.2	0.000169455	636.2	7.71906e-05	636.2	9.28389e-05	636.2	6.46827e-05	636.2	8.89795e-05	636.2	5.97714e-05	636.2	0.000166211	636.2	7.93191e-05	636.2	0.000148833
636.4	9.76713e-05	636.4	0.000156789	636.4	0.000228362	636.4	5.42051e-05	636.4	9.02852e-05	636.4	7.8079e-05	636.4	0.000166677	636.4	7.71906e-05	636.4	8.86731e-05	636.4	6.24407e-05	636.4	8.89795e-05	636.4	5.63109e-05	636.4	0.000166211	636.4	8.62103e-05	636.4	0.000148833
636.6	9.76713e-05	636.6	0.000154308	636.6	0.00016912	636.6	5.42051e-05	636.6	0.000111988	636.6	7.30119e-05	636.6	0.000147232	636.6	7.65509e-05	636.6	6.87365e-05	636.6	5.9526e-05	636.6	8.46284e-05	636.6	5.41088e-05	636.6	0.000166677	636.6	8.53665e-05	636.6	0.000152658
636.8	9.09929e-05	636.8	0.000154308	636.8	0.000191399	636.8	5.42051e-05	636.8	0.000111988	636.8	6.84055e-05	636.8	0.00013149	636.8	7.65509e-05	636.8	6.72487e-05	636.8	5.78445e-05	636.8	8.46284e-05	636.8	5.41088e-05	636.8	0.000166677	636.8	8.66322e-05	636.8	0.000148833
637	8.97407e-05	637	0.000154308	637	0.00012608	637	5.09944e-05	637	0.000124142	637	6.84055e-05	637	0.000115748	637	7.65509e-05	637	6.57609e-05	637	5.60509e-05	637	8.46284e-05	637	5.23262e-05	637	0.000166677	637	8.66322e-05	637	0.000148833
637.2	8.76537e-05	637.2	0.000170685	637.2	0.000140258	637.2	5.09944e-05	637.2	0.000130219	637.2	6.81752e-05	637.2	0.000109266	637.2	7.71906e-05	637.2	6.45707e-05	637.2	5.43694e-05	637.2	8.46284e-05	637.2	5.41088e-05	637.2	0.000166677	637.2	8.53665e-05	637.2	0.000146399
637.4	6.55316e-05	637.4	0.000168204	637.4	0.000154942	637.4	5.09944e-05	637.4	0.000124142	637.4	6.35687e-05	637.4	8.61167e-05	637.4	8.08155e-05	637.4	6.39755e-05	637.4	5.34725e-05	637.4	8.04949e-05	637.4	5.41088e-05	637.4	0.000155038	637.4	8.53665e-05	637.4	0.000146399
637.6	6.55316e-05	637.6	0.000171181	637.6	0.000201526	637.6	5.005e-05	637.6	0.000124142	637.6	6.28778e-05	637.6	8.61167e-05	637.6	8.08155e-05	637.6	6.45707e-05	637.6	5.64993e-05	637.6	8.04949e-05	637.6	5.41088e-05	637.6	0.000139674	637.6	8.53665e-05	637.6	0.000126578
637.8	6.55316e-05	637.8	0.000179618	637.8	0.000150385	637.8	5.005e-05	637.8	0.000122406	637.8	6.28778e-05	637.8	8.61167e-05	637.8	8.59331e-05	637.8	6.45707e-05	637.8	5.16789e-05	637.8	8.04949e-05	637.8	6.13443e-05	637.8	0.000127568	637.8	8.53665e-05	637.8	0.000126578
638	6.55316e-05	638	0.000179618	638	0.000158487	638	5.30719e-05	638	0.000147582	638	6.35687e-05	638	0.000115748	638	9.1264e-05	638	6.45707e-05	638	5.23515e-05	638	8.96321e-05	638	7.80174e-05	638	0.000127568	638	8.38195e-05	638	0.000126578
638.2	7.4297e-05	638.2	0.000181603	638.2	0.000124055	638.2	5.4394e-05	638.2	0.000147582	638.2	6.35687e-05	638.2	0.000139824	638.2	9.44625e-05	638.2	5.6239e-05	638.2	5.03337e-05	638.2	8.96321e-05	638.2	8.08486e-05	638.2	0.000127568	638.2	8.38195e-05	638.2	0.000126578
638.4	7.68014e-05	638.4	0.000195499	638.4	0.000186336	638.4	5.45828e-05	638.4	0.000122406	638.4	6.33384e-05	638.4	0.000141676	638.4	9.1264e-05	638.4	4.96926e-05	638.4	4.99974e-05	638.4	9.39832e-05	638.4	8.26313e-05	638.4	0.000127568	638.4	8.05848e-05	638.4	0.000134923
638.6	7.68014e-05	638.6	0.000195499	638.6	0.000226337	638.6	6.61038e-05	638.6	0.000122406	638.6	6.35687e-05	638.6	0.000165751	638.6	8.08155e-05	638.6	4.96926e-05	638.6	5.04458e-05	638.6	8.89795e-05	638.6	8.26313e-05	638.6	0.000137811	638.6	8.05848e-05	638.6	0.000134923
638.8	7.68014e-05	638.8	0.000207409	638.8	0.000212666	638.8	6.61038e-05	638.8	0.000147582	638.8	6.93268e-05	638.8	0.000165751	638.8	7.56979e-05	638.8	4.96926e-05	638.8	5.01095e-05	638.8	8.89795e-05	638.8	8.26313e-05	638.8	0.000137811	638.8	8.05848e-05	638.8	0.000134923
639	7.4297e-05	639	0.000207409	639	0.000177221	639	6.61038e-05	639	0.000141505	639	7.25513e-05	639	0.000165751	639	6.99406e-05	639	4.96926e-05	639	4.91006e-05	639	8.89795e-05	639	7.80174e-05	639	0.000151313	639	8.05848e-05	639	0.000134923
639.2	7.26274e-05	639.2	0.000207409	639.2	0.00020102	639.2	6.61038e-05	639.2	0.000141505	639.2	7.30119e-05	639.2	0.000147232	639.2	6.99406e-05	639.2	5.26682e-05	639.2	4.96611e-05	639.2	8.89795e-05	639.2	7.80174e-05	639.2	0.000151313	639.2	7.79127e-05	639.2	0.00011232
639.4	7.26274e-05	639.4	0.000207409	639.4	0.000177221	639.4	6.45928e-05	639.4	0.000111988	639.4	7.30119e-05	639.4	0.000141676	639.4	5.86392e-05	639.4	5.26682e-05	639.4	5.27999e-05	639.4	7.76667e-05	639.4	8.45188e-05	639.4	0.000151313	639.4	7.36936e-05	639.4	9.28468e-05
639.6	6.51142e-05	639.6	0.000207409	639.6	5.77235e-05	639.6	6.10044e-05	639.6	0.000111988	639.6	7.30119e-05	639.6	0.000120378	639.6	5.77863e-05	639.6	5.26682e-05	639.6	5.07821e-05	639.6	5.2648e-05	639.6	8.45188e-05	639.6	0.000151779	639.6	7.36936e-05	639.6	9.21513e-05
639.8	5.88532e-05	639.8	0.000204928	639.8	0.000155448	639.8	5.66604e-05	639.8	0.000103307	639.8	7.30119e-05	639.8	0.000120378	639.8	5.77863e-05	639.8	5.26682e-05	639.8	4.82038e-05	639.8	5.2648e-05	639.8	7.30888e-05	639.8	0.000159228	639.8	7.36936e-05	639.8	8.93694e-05
640	6.51142e-05	640	0.000178625	640	0.000203551	640	5.66604e-05	640	8.94171e-05	640	5.61984e-05	640	0.000120378	640	5.86392e-05	640	4.34439e-05	640	4.28229e-05	640	5.2648e-05	640	7.43472e-05	640	0.00016109	640	7.05996e-05	640	8.83262e-05
640.2	6.51142e-05	640.2	0.000161256	640.2	0.000103295	640.2	5.66604e-05	640.2	8.94171e-05	640.2	5.50468e-05	640.2	0.000120378	640.2	5.88525e-05	640.2	3.42195e-05	640.2	4.48407e-05	640.2	5.24305e-05	640.2	7.43472e-05	640.2	0.00016109	640.2	7.05996e-05	640.2	8.48488e-05
640.4	6.51142e-05	640.4	0.000161256	640.4	0.000170133	640.4	5.66604e-05	640.4	7.11864e-05	640.4	5.11314e-05	640.4	0.000137972	640.4	7.37788e-05	640.4	3.39219e-05	640.4	4.4056e-05	640.4	4.61214e-05	640.4	7.43472e-05	640.4	0.000159228	640.4	7.05996e-05	640.4	8.48488e-05
640.6	6.63664e-05	640.6	0.000135449	640.6	0.000167601	640.6	6.04378e-05	640.6	5.90326e-05	640.6	4.12275e-05	640.6	0.000137972	640.6	5.92789e-05	640.6	3.39219e-05	640.6	4.49528e-05	640.6	4.61214e-05	640.6	7.30888e-05	640.6	0.000159228	640.6	7.05996e-05	640.6	8.48488e-05
640.8	6.63664e-05	640.8	0.000135449	640.8	0.000185829	640.8	5.66604e-05	640.8	5.90326e-05	640.8	4.12275e-05	640.8	0.000137972	640.8	6.50362e-05	640.8	3.39219e-05	640.8	4.46165e-05	640.8	5.4606e-05	640.8	6.93138e-05	640.8	0.000159228	640.8	7.56626e-05	640.8	8.93694e-05
641	6.92882e-05	641	0.000161256	641	0.000108865	641	5.66604e-05	641	8.42083e-05	641	4.09972e-05	641	0.000174085	641	6.82347e-05	641	3.42195e-05	641	4.32713e-05	641	5.6564e-05	641	6.58534e-05	641	0.000137811	641	7.36936e-05	641	8.93694e-05
641.2	8.55667e-05	641.2	0.000161256	641.2	0.000134182	641.2	5.66604e-05	641.2	8.50765e-05	641.2	3.82334e-05	641.2	0.000175011	641.2	6.82347e-05	641.2	5.65365e-05	641.2	4.10292e-05	641.2	5.6564e-05	641.2	6.58534e-05	641.2	0.000107083	641.2	7.36936e-05	641.2	0.000101888
641.4	8.55667e-05	641.4	0.000161256	641.4	0.000167601	641.4	5.57161e-05	641.4	8.50765e-05	641.4	3.82334e-05	641.4	0.000200939	641.4	6.82347e-05	641.4	6.3678e-05	641.4	4.00203e-05	641.4	5.28656e-05	641.4	6.37561e-05	641.4	0.000105686	641.4	7.36936e-05	641.4	0.000121362
641.6	8.55667e-05	641.6	0.000158774	641.6	0.000136207	641.6	4.91057e-05	641.6	8.50765e-05	641.6	3.82334e-05	641.6	0.000200939	641.6	6.50362e-05	641.6	6.57609e-05	641.6	4.19261e-05	641.6	5.28656e-05	641.6	6.37561e-05	641.6	0.000105686	641.6	7.36936e-05	641.6	0.000131098
641.8	6.92882e-05	641.8	0.00013396	641.8	0.000128106	641.8	4.47617e-05	641.8	9.37577e-05	641.8	3.82334e-05	641.8	0.000200939	641.8	6.50362e-05	641.8	6.57609e-05	641.8	4.2935e-05	641.8	5.6564e-05	641.8	5.55769e-05	641.8	0.000105686	641.8	6.69431e-05	641.8	0.000131098
642	6.21924e-05	642	0.000149841	642	9.01297e-05	642	4.19287e-05	642	9.89665e-05	642	4.19185e-05	642	0.000200939	642	6.50362e-05	642	6.3678e-05	642	4.15898e-05	642	5.28656e-05	642	5.55769e-05	642	0.000107083	642	6.34272e-05	642	0.000131098
642.2	6.21924e-05	642.2	0.000139419	642.2	0.000134688	642.2	4.19287e-05	642.2	0.000102439	642.2	5.52772e-05	642.2	0.000207421	642.2	5.67201e-05	642.2	6.3678e-05	642.2	4.24866e-05	642.2	5.28656e-05	642.2	5.23262e-05	642.2	0.000107083	642.2	6.34272e-05	642.2	0.000131098
642.4	5.63488e-05	642.4	0.000139419	642.4	5.77235e-05	642.4	4.19287e-05	642.4	0.000102439	642.4	5.52772e-05	642.4	0.000207421	642.4	5.50143e-05	642.4	6.3678e-05	642.4	4.25987e-05	642.4	5.28656e-05	642.4	4.72928e-05	642.4	0.00011267	642.4	6.34272e-05	642.4	0.000127621
642.6	4.25747e-05	642.6	0.000132968	642.6	0.000128612	642.6	4.07955e-05	642.6	0.000102439	642.6	5.59681e-05	642.6	0.000207421	642.6	4.90437e-05	642.6	6.57609e-05	642.6	3.8563e-05	642.6	5.8522e-05	642.6	4.72928e-05	642.6	0.00011267	642.6	6.23021e-05	642.6	0.000127621
642.8	3.84007e-05	642.8	0.000132968	642.8	0.00012203	642.8	4.19287e-05	642.8	0.00010678	642.8	6.35687e-05	642.8	0.000207421	642.8	4.90437e-05	642.8	7.94487e-05	642.8	3.84509e-05	642.8	6.72241e-05	642.8	4.69782e-05	642.8	0.00011267	642.8	6.08957e-05	642.8	0.000127273
643	3.84007e-05	643	0.000139419	643	9.97503e-05	643	4.07955e-05	643	0.00010678	643	6.35687e-05	643	0.000193531	643	4.75511e-05	643	7.94487e-05	643	3.8563e-05	643	6.72241e-05	643	4.49858e-05	643	0.000107083	643	5.24575e-05	643	0.000117189
643.2	4.25747e-05	643.2	0.000143886	643.2	0.000208109	643.2	4.07955e-05	643.2	0.00010678	643.2	5.59681e-05	643.2	0.000193531	643.2	4.75511e-05	643.2	8.12341e-05	643.2	3.75541e-05	643.2	6.72241e-05	643.2	4.49858e-05	643.2	0.000104755	643.2	5.24575e-05	643.2	0.000117189
643.4	3.84007e-05	643.4	0.000143886	643.4	0.000220767	643.4	4.62727e-05	643.4	0.000109384	643.4	5.59681e-05	643.4	0.000193531	643.4	4.52055e-05	643.4	8.12341e-05	643.4	3.47515e-05	643.4	6.72241e-05	643.4	4.49858e-05	643.4	9.4978e-05	643.4	4.86603e-05	643.4	0.000117189
643.6	3.04701e-05	643.6	0.000144382	643.6	0.000113928	643.6	4.62727e-05	643.6	0.00010678	643.6	5.41256e-05	643.6	0.000178715	643.6	4.22202e-05	643.6	7.94487e-05	643.6	3.48636e-05	643.6	6.63539e-05	643.6	4.00573e-05	643.6	8.79943e-05	643.6	4.45818e-05	643.6	0.000128664
643.8	2.58787e-05	643.8	0.000144382	643.8	5.26601e-05	643.8	4.07955e-05	643.8	0.00010678	643.8	5.45862e-05	643.8	0.000172233	643.8	4.22202e-05	643.8	7.94487e-05	643.8	3.35184e-05	643.8	5.8522e-05	643.8	3.70163e-05	643.8	7.30958e-05	643.8	4.35974e-05	643.8	0.000130403
644	2.58787e-05	644	0.000144382	644	9.62059e-05	644	4.07955e-05	644	0.000109384	644	5.09011e-05	644	8.61167e-05	644	4.22202e-05	644	7.37951e-05	644	3.37426e-05	644	4.98198e-05	644	3.19829e-05	644	7.30958e-05	644	4.35974e-05	644	0.000128664
644.2	3.04701e-05	644.2	0.000144382	644.2	0.000117979	644.2	3.66404e-05	644.2	0.000109384	644.2	5.09011e-05	644.2	5.46332e-05	644.2	2.81468e-05	644.2	6.81414e-05	644.2	3.16127e-05	644.2	4.98198e-05	644.2	3.19829e-05	644.2	7.30958e-05	644.2	4.86603e-05	644.2	0.000132489
644.4	5.09226e-05	644.4	0.000140908	644.4	0.000114941	644.4	3.66404e-05	644.4	0.000104175	644.4	5.45862e-05	644.4	5.27812e-05	644.4	2.68674e-05	644.4	7.37951e-05	644.4	3.03796e-05	644.4	4.98198e-05	644.4	3.19829e-05	644.4	6.5181e-05	644.4	4.65508e-05	644.4	0.000132489
644.6	5.09226e-05	644.6	0.000140908	644.6	0.000116966	644.6	3.60738e-05	644.6	0.000103307	644.6	5.45862e-05	644.6	3.98174e-05	644.6	2.23895e-05	644.6	7.37951e-05	644.6	3.0828e-05	644.6	5.63464e-05	644.6	3.61774e-05	644.6	6.5181e-05	644.6	4.65508e-05	644.6	0.000128664
644.8	5.9688e-05	644.8	0.000140908	644.8	8.55726e-05	644.8	3.19187e-05	644.8	0.000102439	644.8	5.29739e-05	644.8	3.98174e-05	644.8	2.23895e-05	644.8	7.52829e-05	644.8	3.03796e-05	644.8	4.89496e-05	644.8	3.70163e-05	644.8	5.40071e-05	644.8	4.65508e-05	644.8	0.000117884
645	7.30448e-05	645	0.000140908	645	0.000120511	645	2.07755e-05	645	8.8549e-05	645	5.29739e-05	645	3.98174e-05	645	2.6441e-05	645	8.56975e-05	645	3.18369e-05	645	4.89496e-05	645	3.76455e-05	645	6.79744e-05	645	4.65508e-05	645	9.21513e-05
645.2	7.30448e-05	645.2	0.000158278	645.2	0.000126587	645.2	2.07755e-05	645.2	8.8549e-05	645.2	4.83675e-05	645.2	5.00032e-05	645.2	2.6441e-05	645.2	7.52829e-05	645.2	3.03796e-05	645.2	4.89496e-05	645.2	3.76455e-05	645.2	7.30958e-05	645.2	4.65508e-05	645.2	6.15501e-05
645.4	7.30448e-05	645.4	0.000175648	645.4	0.00018988	645.4	2.07755e-05	645.4	7.46589e-05	645.4	3.66211e-05	645.4	5.00032e-05	645.4	2.6441e-05	645.4	7.76633e-05	645.4	3.39668e-05	645.4	4.09001e-05	645.4	3.76455e-05	645.4	7.30958e-05	645.4	4.35974e-05	645.4	6.01592e-05
645.6	7.30448e-05	645.6	0.000175648	645.6	0.000137726	645.6	2.07755e-05	645.6	7.46589e-05	645.6	3.63908e-05	645.6	5.00032e-05	645.6	2.98527e-05	645.6	7.76633e-05	645.6	2.98191e-05	645.6	3.76368e-05	645.6	3.76455e-05	645.6	9.77715e-05	645.6	4.35974e-05	645.6	6.01592e-05
645.8	5.92706e-05	645.8	0.000175648	645.8	7.64584e-05	645.8	2.19087e-05	645.8	6.94502e-05	645.8	3.63908e-05	645.8	4.81513e-05	645.8	3.60365e-05	645.8	9.49219e-05	645.8	2.7577e-05	645.8	3.76368e-05	645.8	3.60725e-05	645.8	9.77715e-05	645.8	4.35974e-05	645.8	6.01592e-05
646	5.92706e-05	646	0.000175648	646	5.87362e-05	646	2.34196e-05	646	3.81976e-05	646	3.63908e-05	646	4.81513e-05	646	3.60365e-05	646	9.49219e-05	646	2.51108e-05	646	3.76368e-05	646	3.60725e-05	646	9.77715e-05	646	4.35974e-05	646	6.15501e-05
646.2	5.92706e-05	646.2	0.000150834	646.2	0.000101776	646.2	3.02189e-05	646.2	2.77801e-05	646.2	3.66211e-05	646.2	4.62993e-05	646.2	3.60365e-05	646.2	9.0756e-05	646.2	2.8698e-05	646.2	4.09001e-05	646.2	3.60725e-05	646.2	0.000100565	646.2	5.47077e-05	646.2	7.85894e-05
646.4	5.92706e-05	646.4	0.000136442	646.4	0.000145322	646.4	3.22964e-05	646.4	1.64944e-05	646.4	3.66211e-05	646.4	4.25954e-05	646.4	3.60365e-05	646.4	7.76633e-05	646.4	3.02675e-05	646.4	4.61214e-05	646.4	3.60725e-05	646.4	0.000100565	646.4	5.47077e-05	646.4	7.85894e-05
646.6	5.25922e-05	646.6	0.000135449	646.6	9.01297e-05	646.6	3.32408e-05	646.6	1.389e-05	646.6	3.82334e-05	646.6	4.25954e-05	646.6	3.60365e-05	646.6	8.27219e-05	646.6	2.66802e-05	646.6	4.96023e-05	646.6	4.07913e-05	646.6	9.77715e-05	646.6	5.47077e-05	646.6	8.17191e-05
646.8	7.30448e-05	646.8	0.000135449	646.8	0.000120511	646.8	3.75847e-05	646.8	1.64944e-05	646.8	4.07669e-05	646.8	4.25954e-05	646.8	3.90217e-05	646.8	9.0756e-05	646.8	2.73528e-05	646.8	5.00374e-05	646.8	4.54053e-05	646.8	9.4978e-05	646.8	5.47077e-05	646.8	8.17191e-05
647	7.30448e-05	647	0.00012999	647	0.000157474	647	4.1551e-05	647	2.77801e-05	647	4.30701e-05	647	4.81513e-05	647	3.90217e-05	647	9.31365e-05	647	2.98191e-05	647	5.00374e-05	647	4.54053e-05	647	8.10106e-05	647	4.61288e-05	647	8.48488e-05
647.2	7.76362e-05	647.2	0.00012999	647.2	6.17743e-05	647.2	4.1551e-05	647.2	2.51757e-05	647.2	4.30701e-05	647.2	0.000101858	647.2	3.90217e-05	647.2	9.0756e-05	647.2	2.93707e-05	647.2	5.00374e-05	647.2	4.54053e-05	647.2	7.49581e-05	647.2	4.57069e-05	647.2	8.48488e-05
647.4	7.30448e-05	647.4	0.000128998	647.4	0.000168107	647.4	4.1551e-05	647.4	2.51757e-05	647.4	4.35308e-05	647.4	0.000101858	647.4	4.69114e-05	647.4	8.27219e-05	647.4	2.73528e-05	647.4	4.96023e-05	647.4	4.54053e-05	647.4	5.0748e-05	647.4	4.57069e-05	647.4	8.5892e-05
647.6	6.13576e-05	647.6	0.000105176	647.6	7.24076e-05	647.6	4.1551e-05	647.6	3.81976e-05	647.6	4.42217e-05	647.6	0.000102784	647.6	5.05364e-05	647.6	8.27219e-05	647.6	2.65681e-05	647.6	4.96023e-05	647.6	4.38323e-05	647.6	5.0748e-05	647.6	4.57069e-05	647.6	8.5892e-05
647.8	6.13576e-05	647.8	0.000100213	647.8	7.19012e-05	647.8	3.77736e-05	647.8	4.94832e-05	647.8	4.42217e-05	647.8	0.000107414	647.8	5.33084e-05	647.8	9.31365e-05	647.8	2.71286e-05	647.8	4.96023e-05	647.8	4.38323e-05	647.8	4.93513e-05	647.8	4.41599e-05	647.8	0.000129707
648	7.30448e-05	648	9.82284e-05	648	7.79774e-05	648	3.66404e-05	648	6.1637e-05	648	4.42217e-05	648	0.000114822	648	5.33084e-05	648	9.96828e-05	648	2.80254e-05	648	3.93772e-05	648	4.15254e-05	648	4.93513e-05	648	4.05034e-05	648	0.000139792
648.2	7.76362e-05	648.2	9.82284e-05	648.2	0.000131144	648.2	3.51294e-05	648.2	8.07358e-05	648.2	4.42217e-05	648.2	0.000114822	648.2	5.39481e-05	648.2	9.31365e-05	648.2	2.38777e-05	648.2	3.74192e-05	648.2	3.96378e-05	648.2	4.93513e-05	648.2	4.05034e-05	648.2	0.000142226
648.4	8.84885e-05	648.4	9.82284e-05	648.4	0.000109877	648.4	3.09743e-05	648.4	8.1604e-05	648.4	4.28398e-05	648.4	0.000158344	648.4	5.54407e-05	648.4	8.92682e-05	648.4	2.34293e-05	648.4	2.80644e-05	648.4	3.59677e-05	648.4	5.81973e-05	648.4	4.3738e-05	648.4	0.000148833
648.6	8.84885e-05	648.6	0.000100213	648.6	0.00015241	648.6	2.92745e-05	648.6	8.1604e-05	648.6	3.75424e-05	648.6	0.000158344	648.6	6.33304e-05	648.6	8.92682e-05	648.6	2.72407e-05	648.6	2.80644e-05	648.6	3.06197e-05	648.6	5.81973e-05	648.6	4.8379e-05	648.6	0.000153354
648.8	9.09929e-05	648.8	0.000102199	648.8	0.000110384	648.8	3.09743e-05	648.8	8.42083e-05	648.8	3.47785e-05	648.8	0.000158344	648.8	5.54407e-05	648.8	8.92682e-05	648.8	2.71286e-05	648.8	2.80644e-05	648.8	2.31745e-05	648.8	6.19219e-05	648.8	4.3738e-05	648.8	0.000153354
649	9.09929e-05	649	0.000103687	649	0.000155955	649	3.51294e-05	649	9.46259e-05	649	3.47785e-05	649	0.000158344	649	5.39481e-05	649	7.64731e-05	649	2.70165e-05	649	2.80644e-05	649	2.14967e-05	649	6.19219e-05	649	4.3738e-05	649	0.000153354
649.2	8.84885e-05	649.2	0.00012205	649.2	7.89901e-05	649.2	3.09743e-05	649.2	9.37577e-05	649.2	3.31663e-05	649.2	0.000124082	649.2	4.60585e-05	649.2	6.42731e-05	649.2	2.58955e-05	649.2	3.17628e-05	649.2	1.898e-05	649.2	9.91682e-05	649.2	4.3738e-05	649.2	0.000157874
649.4	6.84534e-05	649.4	0.000140412	649.4	7.03822e-05	649.4	2.92745e-05	649.4	9.46259e-05	649.4	2.87902e-05	649.4	0.000116674	649.4	4.60585e-05	649.4	5.95121e-05	649.4	2.29809e-05	649.4	3.80719e-05	649.4	1.898e-05	649.4	0.000107549	649.4	4.40193e-05	649.4	0.000157874
649.6	6.84534e-05	649.6	0.000140412	649.6	9.87376e-05	649.6	2.45528e-05	649.6	0.000118065	649.6	3.31663e-05	649.6	0.000116674	649.6	4.15805e-05	649.6	4.88e-05	649.6	2.32051e-05	649.6	3.80719e-05	649.6	1.84557e-05	649.6	0.000107549	649.6	4.50038e-05	649.6	0.000157874
649.8	6.84534e-05	649.8	0.00012205	649.8	0.000116966	649.8	2.2853e-05	649.8	0.000118065	649.8	3.47785e-05	649.8	0.000116674	649.8	3.17718e-05	649.8	4.79073e-05	649.8	2.07388e-05	649.8	3.8507e-05	649.8	1.84557e-05	649.8	0.000107549	649.8	4.50038e-05	649.8	0.000157874
650	7.4297e-05	650	0.000120561	650	7.69647e-05	650	2.2853e-05	650	0.000118065	650	3.47785e-05	650	0.000124082	650	2.96395e-05	650	3.00536e-05	650	2.25325e-05	650	3.93772e-05	650	1.64633e-05	650	0.000107549	650	4.50038e-05	650	0.000128664
650.2	7.4297e-05	650.2	0.000120561	650.2	0.000153929	650.2	1.90757e-05	650.2	0.000118065	650.2	4.16882e-05	650.2	0.000158344	650.2	2.62277e-05	650.2	3.00536e-05	650.2	2.15235e-05	650.2	4.67741e-05	650.2	1.34223e-05	650.2	0.000101962	650.2	5.06292e-05	650.2	8.65875e-05
650.4	7.76362e-05	650.4	0.00012205	650.4	7.84838e-05	650.4	1.51094e-05	650.4	0.000118065	650.4	4.33004e-05	650.4	0.000164825	650.4	2.43086e-05	650.4	3.00536e-05	650.4	1.89452e-05	650.4	4.11177e-05	650.4	1.34223e-05	650.4	0.000101962	650.4	5.11918e-05	650.4	8.65875e-05
650.6	7.76362e-05	650.6	0.000140412	650.6	0.000116966	650.6	1.51094e-05	650.6	0.000118065	650.6	4.65249e-05	650.6	0.000171307	650.6	2.43086e-05	650.6	2.58878e-05	650.6	1.93936e-05	650.6	4.11177e-05	650.6	1.34223e-05	650.6	0.000101962	650.6	5.11918e-05	650.6	8.65875e-05
650.8	7.76362e-05	650.8	0.000142893	650.8	0.000176715	650.8	1.45428e-05	650.8	0.000102439	650.8	4.65249e-05	650.8	0.000200013	650.8	2.15366e-05	650.8	1.51756e-05	650.8	1.72637e-05	650.8	4.11177e-05	650.8	1.34223e-05	650.8	0.000101962	650.8	5.11918e-05	650.8	8.65875e-05
651	7.51318e-05	651	0.000146864	651	9.06361e-05	651	1.45428e-05	651	9.5494e-05	651	4.65249e-05	651	0.000200013	651	1.36469e-05	651	1.19024e-05	651	1.69274e-05	651	4.67741e-05	651	1.53099e-05	651	8.79943e-05	651	5.11918e-05	651	9.14558e-05
651.2	7.51318e-05	651.2	0.000147856	651.2	0.000122536	651.2	1.51094e-05	651.2	0.000102439	651.2	4.65249e-05	651.2	0.000200013	651.2	1.36469e-05	651.2	2.58878e-05	651.2	1.83847e-05	651.2	5.35182e-05	651.2	2.67398e-05	651.2	8.79943e-05	651.2	5.11918e-05	651.2	9.14558e-05
651.4	6.13576e-05	651.4	0.000147856	651.4	8.55726e-05	651.4	1.66204e-05	651.4	0.000123274	651.4	4.81372e-05	651.4	0.000212051	651.4	1.36469e-05	651.4	2.61853e-05	651.4	2.02904e-05	651.4	6.26555e-05	651.4	2.67398e-05	651.4	8.79943e-05	651.4	5.11918e-05	651.4	9.42378e-05
651.6	6.13576e-05	651.6	0.000146864	651.6	8.9117e-05	651.6	1.66204e-05	651.6	0.000123274	651.6	4.65249e-05	651.6	0.000200013	651.6	4.69114e-06	651.6	2.61853e-05	651.6	1.79363e-05	651.6	6.39608e-05	651.6	2.67398e-05	651.6	8.52008e-05	651.6	5.00667e-05	651.6	9.42378e-05
651.8	6.13576e-05	651.8	0.000147856	651.8	5.16474e-05	651.8	1.66204e-05	651.8	0.000102439	651.8	4.23792e-05	651.8	0.000199087	651.8	4.69114e-06	651.8	2.61853e-05	651.8	2.33172e-05	651.8	6.52661e-05	651.8	3.32413e-05	651.8	7.35614e-05	651.8	4.8379e-05	651.8	9.42378e-05
652	6.05228e-05	652	0.000148352	652	9.01297e-05	652	1.75647e-05	652	9.89665e-05	652	4.23792e-05	652	0.000190753	652	4.69114e-06	652	4.01707e-05	652	2.08509e-05	652	6.52661e-05	652	2.67398e-05	652	7.35614e-05	652	4.78165e-05	652	8.76307e-05
652.2	5.25922e-05	652.2	0.000146864	652.2	0.000130131	652.2	1.81313e-05	652.2	0.00014845	652.2	4.37611e-05	652.2	0.000171307	652.2	4.69114e-06	652.2	4.31463e-05	652.2	1.95057e-05	652.2	6.57012e-05	652.2	2.67398e-05	652.2	7.35614e-05	652.2	4.34567e-05	652.2	8.06759e-05
652.4	5.25922e-05	652.4	0.000139916	652.4	4.91156e-05	652.4	1.81313e-05	652.4	0.00014845	652.4	4.72159e-05	652.4	0.00014075	652.4	1.2794e-05	652.4	4.64195e-05	652.4	2.12993e-05	652.4	6.52661e-05	652.4	2.67398e-05	652.4	7.35614e-05	652.4	3.99408e-05	652.4	8.06759e-05
652.6	5.25922e-05	652.6	0.000131975	652.6	0.000159499	652.6	2.32308e-05	652.6	0.000144109	652.6	4.37611e-05	652.6	0.000130564	652.6	1.2794e-05	652.6	5.20731e-05	652.6	1.99541e-05	652.6	6.39608e-05	652.6	2.93614e-05	652.6	8.19418e-05	652.6	3.9097e-05	652.6	7.85894e-05
652.8	5.25922e-05	652.8	0.000131975	652.8	0.000104307	652.8	2.75747e-05	652.8	0.000144109	652.8	4.37611e-05	652.8	0.000130564	652.8	2.30292e-05	652.8	5.74292e-05	652.8	1.96178e-05	652.8	5.52587e-05	652.8	2.99905e-05	652.8	9.40468e-05	652.8	3.82532e-05	652.8	6.98959e-05
653	5.25922e-05	653	0.000139916	653	0.000197982	653	3.07855e-05	653	0.000117197	653	4.72159e-05	653	0.00014075	653	2.5588e-05	653	5.74292e-05	653	1.88331e-05	653	4.6339e-05	653	2.99905e-05	653	9.40468e-05	653	3.33309e-05	653	6.64185e-05
653.2	5.25922e-05	653.2	0.000139916	653.2	0.000137726	653.2	3.07855e-05	653.2	0.000117197	653.2	4.72159e-05	653.2	0.000160196	653.2	2.5588e-05	653.2	6.66536e-05	653.2	1.8721e-05	653.2	3.80719e-05	653.2	2.93614e-05	653.2	9.40468e-05	653.2	3.33309e-05	653.2	6.64185e-05
653.4	5.25922e-05	653.4	0.000131975	653.4	0.000188361	653.4	3.07855e-05	653.4	0.000117197	653.4	4.72159e-05	653.4	0.000170381	653.4	2.30292e-05	653.4	6.66536e-05	653.4	1.73758e-05	653.4	3.35033e-05	653.4	2.99905e-05	653.4	9.40468e-05	653.4	3.33309e-05	653.4	5.87682e-05
653.6	6.30272e-05	653.6	0.000130983	653.6	6.22807e-05	653.6	3.07855e-05	653.6	7.20546e-05	653.6	4.14579e-05	653.6	0.000170381	653.6	2.30292e-05	653.6	6.66536e-05	653.6	1.60306e-05	653.6	3.35033e-05	653.6	3.12489e-05	653.6	7.58893e-05	653.6	2.58772e-05	653.6	5.87682e-05
653.8	7.97231e-05	653.8	0.000128501	653.8	5.97489e-05	653.8	1.90757e-05	653.8	7.20546e-05	653.8	4.14579e-05	653.8	0.000170381	653.8	2.5588e-05	653.8	6.66536e-05	653.8	1.60306e-05	653.8	3.35033e-05	653.8	3.12489e-05	653.8	7.03023e-05	653.8	2.32051e-05	653.8	5.87682e-05
654	8.89059e-05	654	0.000103191	654	0.000110384	654	1.79425e-05	654	7.20546e-05	654	4.07669e-05	654	0.000170381	654	2.5588e-05	654	4.90975e-05	654	1.28917e-05	654	4.6339e-05	654	3.22975e-05	654	7.03023e-05	654	1.88453e-05	654	5.87682e-05
654.2	8.89059e-05	654.2	9.5747e-05	654.2	5.92426e-05	654.2	1.79425e-05	654.2	7.20546e-05	654.2	4.07669e-05	654.2	0.000170381	654.2	2.5588e-05	654.2	4.01707e-05	654.2	1.04255e-05	654.2	4.98198e-05	654.2	3.22975e-05	654.2	7.03023e-05	654.2	1.87047e-05	654.2	6.98959e-05
654.4	8.84885e-05	654.4	9.42581e-05	654.4	0.000129625	654.4	1.79425e-05	654.4	8.94171e-05	654.4	4.07669e-05	654.4	0.000164825	654.4	3.07056e-05	654.4	3.89804e-05	654.4	1.0986e-05	654.4	5.2648e-05	654.4	3.22975e-05	654.4	7.03023e-05	654.4	1.87047e-05	654.4	6.98959e-05
654.6	8.84885e-05	654.6	9.2273e-05	654.6	4.91156e-05	654.6	1.79425e-05	654.6	0.000101571	654.6	4.76766e-05	654.6	0.000164825	654.6	3.58232e-05	654.6	3.89804e-05	654.6	9.08024e-06	654.6	5.2648e-05	654.6	3.22975e-05	654.6	8.84599e-05	654.6	1.88453e-05	654.6	8.31101e-05
654.8	8.84885e-05	654.8	8.6814e-05	654.8	0.000124055	654.8	1.94534e-05	654.8	0.000112857	654.8	4.76766e-05	654.8	0.000147232	654.8	3.62497e-05	654.8	3.89804e-05	654.8	1.22191e-05	654.8	5.2648e-05	654.8	3.08294e-05	654.8	9.21845e-05	654.8	2.32051e-05	654.8	8.31101e-05
655	8.76537e-05	655	7.14293e-05	655	5.31664e-05	655	1.94534e-05	655	0.000112857	655	4.76766e-05	655	0.000147232	655	3.8382e-05	655	4.01707e-05	655	1.73758e-05	655	4.98198e-05	655	2.62155e-05	655	0.000101031	655	3.9097e-05	655	6.98959e-05
655.2	8.76537e-05	655.2	7.14293e-05	655.2	0.000176209	655.2	2.03977e-05	655.2	0.000112857	655.2	4.21488e-05	655.2	0.000147232	655.2	3.8382e-05	655.2	3.89804e-05	655.2	1.55821e-05	655.2	4.96023e-05	655.2	2.57961e-05	655.2	0.000101031	655.2	3.9097e-05	655.2	6.25933e-05
655.4	8.59841e-05	655.4	5.60447e-05	655.4	0.000133169	655.4	2.03977e-05	655.4	0.000101571	655.4	4.21488e-05	655.4	0.000167603	655.4	3.90217e-05	655.4	4.07658e-05	655.4	1.44611e-05	655.4	2.98049e-05	655.4	2.47474e-05	655.4	9.8237e-05	655.4	3.9097e-05	655.4	5.73772e-05
655.6	8.05579e-05	655.6	5.60447e-05	655.6	0.000111396	655.6	1.94534e-05	655.6	7.89996e-05	655.6	3.82334e-05	655.6	0.000207421	655.6	4.30732e-05	655.6	4.07658e-05	655.6	1.36764e-05	655.6	2.98049e-05	655.6	2.13919e-05	655.6	9.21845e-05	655.6	3.9097e-05	655.6	5.32043e-05
655.8	7.6384e-05	655.8	5.60447e-05	655.8	8.15218e-05	655.8	1.7187e-05	655.8	6.42414e-05	655.8	3.66211e-05	655.8	0.000207421	655.8	5.99186e-05	655.8	4.07658e-05	655.8	1.39006e-05	655.8	2.98049e-05	655.8	2.10773e-05	655.8	8.84599e-05	655.8	3.9097e-05	655.8	5.32043e-05
656	7.55492e-05	656	5.60447e-05	656	8.00028e-05	656	1.7187e-05	656	6.42414e-05	656	3.43179e-05	656	0.000207421	656	5.99186e-05	656	3.71951e-05	656	1.49095e-05	656	2.98049e-05	656	2.13919e-05	656	7.63549e-05	656	3.26277e-05	656	4.59018e-05
656.2	7.05404e-05	656.2	6.8948e-05	656.2	0.000155448	656.2	1.5676e-05	656.2	6.42414e-05	656.2	3.01721e-05	656.2	0.000207421	656.2	5.99186e-05	656.2	3.71951e-05	656.2	1.25554e-05	656.2	4.13352e-05	656.2	2.1287e-05	656.2	6.79744e-05	656.2	3.16433e-05	656.2	4.59018e-05
656.4	6.5949e-05	656.4	7.34145e-05	656.4	0.00012203	656.4	1.5676e-05	656.4	6.42414e-05	656.4	2.41838e-05	656.4	0.000195383	656.4	6.1198e-05	656.4	3.71951e-05	656.4	1.31159e-05	656.4	4.74267e-05	656.4	1.99238e-05	656.4	6.79744e-05	656.4	2.86899e-05	656.4	4.59018e-05
656.6	4.17399e-05	656.6	7.53996e-05	656.6	0.000222793	656.6	1.5676e-05	656.6	5.4692e-05	656.6	1.72741e-05	656.6	0.000158344	656.6	6.16245e-05	656.6	3.71951e-05	656.6	1.18828e-05	656.6	5.52587e-05	656.6	1.99238e-05	656.6	6.79744e-05	656.6	3.16433e-05	656.6	4.24244e-05
656.8	3.75659e-05	656.8	8.58214e-05	656.8	0.000131144	656.8	2.07755e-05	656.8	7.29227e-05	656.8	1.72741e-05	656.8	0.000138898	656.8	6.16245e-05	656.8	2.44e-05	656.8	1.14344e-05	656.8	5.52587e-05	656.8	2.1287e-05	656.8	7.26302e-05	656.8	3.26277e-05	656.8	4.24244e-05
657	3.13049e-05	657	8.58214e-05	657	0.000145828	657	2.09643e-05	657	7.63952e-05	657	1.26677e-05	657	0.000138898	657	6.1198e-05	657	2.44e-05	657	1.17707e-05	657	5.52587e-05	657	2.7369e-05	657	7.26302e-05	657	3.26277e-05	657	4.24244e-05
657.2	2.08699e-05	657.2	8.58214e-05	657.2	6.53187e-05	657.2	2.24753e-05	657.2	7.63952e-05	657.2	1.26677e-05	657.2	0.000138898	657.2	5.39481e-05	657.2	3.83853e-05	657.2	9.41655e-06	657.2	4.74267e-05	657.2	3.06197e-05	657.2	0.000102427	657.2	3.22058e-05	657.2	4.24244e-05
657.4	3.75659e-06	657.4	9.17767e-05	657.4	0.000170639	657.4	2.4364e-05	657.4	7.63952e-05	657.4	1.26677e-05	657.4	0.000138898	657.4	5.24555e-05	657.4	4.25512e-05	657.4	9.86495e-06	657.4	4.15528e-05	657.4	3.16683e-05	657.4	0.000103358	657.4	3.16433e-05	657.4	4.24244e-05
657.6	0	657.6	9.17767e-05	657.6	7.84838e-05	657.6	2.49306e-05	657.6	7.63952e-05	657.6	1.26677e-05	657.6	0.000138898	657.6	5.90657e-05	657.6	4.99902e-05	657.6	9.64075e-06	657.6	3.98123e-05	657.6	3.16683e-05	657.6	0.000116395	657.6	2.39082e-05	657.6	4.06857e-05
657.8	0	657.8	9.37619e-05	657.8	0.00011646	657.8	2.4364e-05	657.8	6.33733e-05	657.8	1.26677e-05	657.8	0.000138898	657.8	5.24555e-05	657.8	5.83219e-05	657.8	1.00892e-05	657.8	2.6324e-05	657.8	3.16683e-05	657.8	0.000116395	657.8	3.07994e-05	657.8	4.06857e-05
658	0	658	9.52507e-05	658	0.000188361	658	2.24753e-05	658	6.33733e-05	658	2.41838e-05	658	0.000138898	658	4.94702e-05	658	5.83219e-05	658	1.12102e-05	658	2.6324e-05	658	3.16683e-05	658	0.000116395	658	3.07994e-05	658	2.43419e-05
658.2	3.75659e-06	658.2	0.000106169	658.2	7.08886e-05	658.2	2.24753e-05	658.2	5.64283e-05	658.2	2.18805e-05	658.2	9.81545e-05	658.2	3.81688e-05	658.2	5.83219e-05	658.2	1.30038e-05	658.2	2.6324e-05	658.2	2.84176e-05	658.2	0.000116395	658.2	3.07994e-05	658.2	2.43419e-05
658.4	1.71133e-05	658.4	9.17767e-05	658.4	3.74697e-05	658.4	2.02089e-05	658.4	5.64283e-05	658.4	2.92508e-05	658.4	9.25986e-05	658.4	3.15586e-05	658.4	5.83219e-05	658.4	1.50216e-05	658.4	2.8282e-05	658.4	2.82079e-05	658.4	0.000107083	658.4	3.07994e-05	658.4	2.43419e-05
658.6	4.84182e-05	658.6	9.17767e-05	658.6	9.41805e-05	658.6	2.02089e-05	658.6	5.64283e-05	658.6	3.45482e-05	658.6	9.25986e-05	658.6	3.81688e-05	658.6	4.28487e-05	658.6	1.45732e-05	658.6	3.89421e-05	658.6	2.67398e-05	658.6	6.98368e-05	658.6	3.07994e-05	658.6	2.43419e-05
658.8	4.96704e-05	658.8	8.87991e-05	658.8	0.000158993	658.8	2.02089e-05	658.8	5.64283e-05	658.8	3.45482e-05	658.8	9.25986e-05	658.8	4.9257e-05	658.8	4.28487e-05	658.8	1.51337e-05	658.8	3.89421e-05	658.8	2.3594e-05	658.8	6.37842e-05	658.8	3.07994e-05	658.8	5.91159e-05
659	8.26449e-05	659	7.98661e-05	659	0.000166082	659	2.002e-05	659	0.00016668	659	3.73121e-05	659	9.81545e-05	659	4.9257e-05	659	4.28487e-05	659	1.28917e-05	659	3.69841e-05	659	2.19162e-05	659	4.46955e-05	659	3.07994e-05	659	5.91159e-05
659.2	8.30623e-05	659.2	7.98661e-05	659.2	0.000122536	659.2	2.002e-05	659.2	0.00016668	659.2	3.73121e-05	659.2	0.00012686	659.2	3.81688e-05	659.2	4.28487e-05	659.2	1.18828e-05	659.2	3.89421e-05	659.2	2.19162e-05	659.2	4.46955e-05	659.2	2.68616e-05	659.2	5.91159e-05
659.4	8.30623e-05	659.4	7.98661e-05	659.4	0.00012203	659.4	2.02089e-05	659.4	0.000169285	659.4	3.73121e-05	659.4	0.000128712	659.4	3.00659e-05	659.4	4.07658e-05	659.4	1.25554e-05	659.4	3.93772e-05	659.4	2.3594e-05	659.4	4.46955e-05	659.4	2.68616e-05	659.4	5.91159e-05
659.6	8.30623e-05	659.6	7.98661e-05	659.6	6.58251e-05	659.6	2.11532e-05	659.6	0.000169285	659.6	3.73121e-05	659.6	0.000133342	659.6	3.00659e-05	659.6	4.07658e-05	659.6	9.19234e-06	659.6	5.04725e-05	659.6	2.51669e-05	659.6	4.46955e-05	659.6	2.65803e-05	659.6	5.7725e-05
659.8	8.30623e-05	659.8	9.2273e-05	659.8	4.9622e-05	659.8	2.17198e-05	659.8	0.000169285	659.8	4.03063e-05	659.8	0.000137972	659.8	2.9213e-05	659.8	4.07658e-05	659.8	1.03134e-05	659.8	5.04725e-05	659.8	2.51669e-05	659.8	8.00795e-05	659.8	2.46114e-05	659.8	5.18134e-05
660	7.221e-05	660	0.000107658	660	0.000142283	660	2.24753e-05	660	0.000169285	660	4.72159e-05	660	0.000137972	660	2.79336e-05	660	2.82683e-05	660	6.3898e-06	660	4.80794e-05	660	2.84176e-05	660	8.00795e-05	660	2.65803e-05	660	5.04224e-05
660.2	7.221e-05	660.2	0.000114606	660.2	0.000151398	660.2	2.75747e-05	660.2	0.000169285	660.2	3.8694e-05	660.2	0.000137972	660.2	2.79336e-05	660.2	8.92682e-06	660.2	7.28661e-06	660.2	4.80794e-05	660.2	2.88371e-05	660.2	0.000110342	660.2	2.55959e-05	660.2	3.68605e-05
660.4	7.221e-05	660.4	0.00014736	660.4	0.000143296	660.4	2.75747e-05	660.4	0.000139768	660.4	3.8694e-05	660.4	0.000137972	660.4	2.79336e-05	660.4	2.38049e-06	660.4	9.75285e-06	660.4	4.80794e-05	660.4	3.09343e-05	660.4	0.000110342	660.4	2.5174e-05	660.4	3.68605e-05
660.6	7.221e-05	660.6	0.00014736	660.6	0.000161018	660.6	2.75747e-05	660.6	0.000129351	660.6	4.72159e-05	660.6	0.000137972	660.6	2.85733e-05	660.6	2.38049e-06	660.6	1.10981e-05	660.6	2.89347e-05	660.6	3.12489e-05	660.6	0.000109411	660.6	2.55959e-05	660.6	3.68605e-05
660.8	8.43145e-05	660.8	0.00014736	660.8	8.15218e-05	660.8	2.75747e-05	660.8	0.000122406	660.8	4.72159e-05	660.8	0.000110192	660.8	2.85733e-05	660.8	2.38049e-06	660.8	9.52865e-06	660.8	2.89347e-05	660.8	3.12489e-05	660.8	8.56664e-05	660.8	2.55959e-05	660.8	3.68605e-05
661	9.34973e-05	661	0.000156293	661	7.69647e-05	661	2.58749e-05	661	7.98677e-05	661	4.72159e-05	661	9.44506e-05	661	3.02792e-05	661	2.38049e-06	661	1.07618e-05	661	2.89347e-05	661	3.12489e-05	661	8.00795e-05	661	2.89712e-05	661	4.97269e-05
661.2	0.000104767	661.2	0.000156293	661.2	0.000112409	661.2	2.03977e-05	661.2	5.99008e-05	661.2	3.8694e-05	661.2	9.44506e-05	661.2	3.02792e-05	661.2	2.38049e-06	661.2	1.14344e-05	661.2	2.89347e-05	661.2	3.12489e-05	661.2	7.96139e-05	661.2	2.92524e-05	661.2	5.66818e-05
661.4	0.000104767	661.4	0.00014736	661.4	0.000111903	661.4	1.81313e-05	661.4	5.81645e-05	661.4	3.8694e-05	661.4	9.44506e-05	661.4	3.02792e-05	661.4	1.6961e-05	661.4	9.30445e-06	661.4	2.6324e-05	661.4	3.12489e-05	661.4	8.56664e-05	661.4	3.755e-05	661.4	7.75462e-05
661.6	9.34973e-05	661.6	0.000125524	661.6	0.000109877	661.6	1.17098e-05	661.6	4.94832e-05	661.6	3.82334e-05	661.6	9.44506e-05	661.6	3.02792e-05	661.6	2.02341e-05	661.6	9.19234e-06	661.6	2.69767e-05	661.6	2.87322e-05	661.6	8.56664e-05	661.6	3.755e-05	661.6	9.66719e-05
661.8	9.34973e-05	661.8	0.000113117	661.8	0.000137726	661.8	5.66604e-06	661.8	4.94832e-05	661.8	3.82334e-05	661.8	0.000135194	661.8	2.60145e-05	661.8	2.02341e-05	661.8	1.08739e-05	661.8	2.69767e-05	661.8	2.87322e-05	661.8	7.77516e-05	661.8	3.89564e-05	661.8	9.66719e-05
662	8.51493e-05	662	0.000113117	662	6.98759e-05	662	5.66604e-06	662	4.51426e-05	662	3.82334e-05	662	0.000135194	662	2.32425e-05	662	2.02341e-05	662	7.06241e-06	662	2.69767e-05	662	2.87322e-05	662	6.70433e-05	662	4.00815e-05	662	9.66719e-05
662.2	6.13576e-05	662.2	0.000116094	662.2	2.02539e-05	662.2	9.4434e-06	662.2	4.51426e-05	662.2	3.82334e-05	662.2	0.000135194	662.2	1.81249e-05	662.2	2.02341e-05	662.2	8.63184e-06	662.2	2.61065e-05	662.2	2.87322e-05	662.2	7.77516e-05	662.2	4.00815e-05	662.2	9.66719e-05
662.4	6.13576e-05	662.4	0.000116094	662.4	1.3165e-05	662.4	8.68793e-06	662.4	4.94832e-05	662.4	3.82334e-05	662.4	0.000161122	662.4	1.81249e-05	662.4	2.85658e-05	662.4	8.07133e-06	662.4	2.61065e-05	662.4	3.14586e-05	662.4	7.77516e-05	662.4	4.55663e-05	662.4	9.35423e-05
662.6	5.50966e-05	662.6	0.000116094	662.6	0.000112409	662.6	8.49906e-06	662.6	9.28896e-05	662.6	3.66211e-05	662.6	0.000135194	662.6	2.32425e-05	662.6	4.99902e-05	662.6	6.1656e-06	662.6	2.19729e-05	662.6	3.43947e-05	662.6	7.77516e-05	662.6	5.41451e-05	662.6	8.5892e-05
662.8	5.30096e-05	662.8	0.000116094	662.8	0.000185829	662.8	8.49906e-06	662.8	9.28896e-05	662.8	3.04024e-05	662.8	0.000135194	662.8	2.32425e-05	662.8	5.1478e-05	662.8	4.93248e-06	662.8	2.19729e-05	662.8	3.43947e-05	662.8	6.33187e-05	662.8	5.41451e-05	662.8	8.5892e-05
663	5.30096e-05	663	0.000116094	663	9.97503e-05	663	8.49906e-06	663	9.28896e-05	663	1.54315e-05	663	0.000125934	663	2.30292e-05	663	5.1478e-05	663	7.73502e-06	663	1.28357e-05	663	3.43947e-05	663	6.33187e-05	663	5.41451e-05	663	6.15501e-05
663.2	5.30096e-05	663.2	0.000116094	663.2	7.49393e-05	663.2	8.49906e-06	663.2	5.12195e-05	663.2	1.45103e-05	663.2	0.000125934	663.2	2.30292e-05	663.2	5.1478e-05	663.2	6.72611e-06	663.2	1.28357e-05	663.2	3.14586e-05	663.2	6.33187e-05	663.2	5.41451e-05	663.2	8.5892e-05
663.4	5.30096e-05	663.4	0.000114109	663.4	0.000182285	663.4	8.49906e-06	663.4	6.77139e-05	663.4	1.45103e-05	663.4	0.000125934	663.4	2.45219e-05	663.4	6.18926e-05	663.4	5.82929e-06	663.4	1.97974e-05	663.4	2.5062e-05	663.4	8.79943e-05	663.4	4.43006e-05	663.4	8.5892e-05
663.6	5.59314e-05	663.6	0.000114109	663.6	0.000188867	663.6	8.49906e-06	663.6	6.77139e-05	663.6	1.45103e-05	663.6	0.000119452	663.6	2.45219e-05	663.6	4.99902e-05	663.6	4.70827e-06	663.6	1.97974e-05	663.6	2.5062e-05	663.6	6.23875e-05	663.6	4.33161e-05	663.6	8.5892e-05
663.8	5.59314e-05	663.8	0.000114109	663.8	7.74711e-05	663.8	8.49906e-06	663.8	5.90326e-05	663.8	7.13997e-06	663.8	0.000119452	663.8	2.30292e-05	663.8	4.16585e-05	663.8	5.49299e-06	663.8	1.24006e-05	663.8	2.5062e-05	663.8	8.79943e-05	663.8	4.00815e-05	663.8	8.76307e-05
664	7.17926e-05	664	0.000114109	664	0.00013165	664	1.47317e-05	664	5.12195e-05	664	1.45103e-05	664	0.000125934	664	2.17498e-05	664	4.16585e-05	664	5.26878e-06	664	1.24006e-05	664	2.5062e-05	664	8.93911e-05	664	3.98002e-05	664	8.76307e-05
664.2	7.17926e-05	664.2	0.00010865	664.2	3.74697e-05	664.2	1.47317e-05	664.2	5.55601e-05	664.2	1.45103e-05	664.2	0.000119452	664.2	2.13234e-05	664.2	4.16585e-05	664.2	5.38088e-06	664.2	1.24006e-05	664.2	2.5062e-05	664.2	9.07878e-05	664.2	3.79719e-05	664.2	8.76307e-05
664.4	7.17926e-05	664.4	0.000117087	664.4	9.82313e-05	664.4	2.15309e-05	664.4	5.90326e-05	664.4	1.45103e-05	664.4	0.000100006	664.4	1.70587e-05	664.4	4.16585e-05	664.4	5.94139e-06	664.4	1.97974e-05	664.4	2.7369e-05	664.4	9.07878e-05	664.4	3.64249e-05	664.4	8.76307e-05
664.6	7.17926e-05	664.6	0.000145375	664.6	0.000112915	664.6	2.15309e-05	664.6	5.90326e-05	664.6	6.67932e-06	664.6	9.90805e-05	664.6	1.70587e-05	664.6	3.77902e-05	664.6	6.95031e-06	664.6	2.98049e-05	664.6	2.7369e-05	664.6	8.93911e-05	664.6	3.19245e-05	664.6	8.76307e-05
664.8	5.05052e-05	664.8	0.000145375	664.8	0.000138739	664.8	2.5686e-05	664.8	5.90326e-05	664.8	6.67932e-06	664.8	9.90805e-05	664.8	1.51396e-05	664.8	3.66e-05	664.8	9.86495e-06	664.8	2.98049e-05	664.8	3.22975e-05	664.8	7.35614e-05	664.8	2.99556e-05	664.8	8.06759e-05
665	5.05052e-05	665	0.000117087	665	9.9244e-05	665	1.79425e-05	665	5.90326e-05	665	6.67932e-06	665	0.000113896	665	1.51396e-05	665	2.49951e-05	665	8.18343e-06	665	3.50262e-05	665	2.7369e-05	665	7.35614e-05	665	2.64397e-05	665	8.06759e-05
665.2	4.84182e-05	665.2	0.000117087	665.2	6.78505e-05	665.2	1.79425e-05	665.2	6.33733e-05	665.2	1.79651e-05	665.2	9.72285e-05	665.2	1.51396e-05	665.2	2.35073e-05	665.2	7.51082e-06	665.2	3.50262e-05	665.2	2.16016e-05	665.2	5.26104e-05	665.2	2.47521e-05	665.2	7.71985e-05
665.4	3.21397e-05	665.4	0.000114109	665.4	0.000129625	665.4	2.17198e-05	665.4	9.5494e-05	665.4	3.24753e-05	665.4	7.31529e-05	665.4	1.98307e-05	665.4	2.32097e-05	665.4	7.06241e-06	665.4	2.98049e-05	665.4	2.16016e-05	665.4	5.26104e-05	665.4	2.12361e-05	665.4	6.01592e-05
665.6	3.00527e-05	665.6	0.00012205	665.6	0.000118485	665.6	2.17198e-05	665.6	9.5494e-05	665.6	3.40876e-05	665.6	5.37072e-05	665.6	2.02572e-05	665.6	2.32097e-05	665.6	1.26675e-05	665.6	2.67591e-05	665.6	2.45377e-05	665.6	5.26104e-05	665.6	2.12361e-05	665.6	6.01592e-05
665.8	3.00527e-05	665.8	0.00012205	665.8	0.00014279	665.8	1.79425e-05	665.8	0.000119802	665.8	5.73501e-05	665.8	5.37072e-05	665.8	2.04704e-05	665.8	2.26146e-05	665.8	1.04255e-05	665.8	2.67591e-05	665.8	2.14967e-05	665.8	5.26104e-05	665.8	2.39082e-05	665.8	6.01592e-05
666	3.00527e-05	666	0.00012205	666	0.000160512	666	1.79425e-05	666	0.000119802	666	5.85017e-05	666	5.37072e-05	666	2.06837e-05	666	2.05317e-05	666	9.97706e-06	666	1.8057e-05	666	2.45377e-05	666	5.49383e-05	666	2.39082e-05	666	7.75462e-05
666.2	3.00527e-05	666.2	0.000131975	666.2	0.000130131	666.2	8.49906e-06	666.2	0.000119802	666.2	5.85017e-05	666.2	4.72253e-05	666.2	2.23895e-05	666.2	1.22e-05	666.2	4.70827e-06	666.2	1.8057e-05	666.2	2.14967e-05	666.2	8.65976e-05	666.2	2.39082e-05	666.2	7.75462e-05
666.4	5.09226e-05	666.4	0.000131975	666.4	8.00028e-05	666.4	8.49906e-06	666.4	0.000119802	666.4	5.85017e-05	666.4	2.40756e-05	666.4	2.98527e-05	666.4	1.22e-05	666.4	2.80254e-06	666.4	8.4846e-06	666.4	2.00286e-05	666.4	8.65976e-05	666.4	2.68616e-05	666.4	7.75462e-05
666.6	6.13576e-05	666.6	0.00012205	666.6	0.000139245	666.6	8.12132e-06	666.6	7.46589e-05	666.6	5.85017e-05	666.6	9.25986e-07	666.6	2.98527e-05	666.6	1.16049e-05	666.6	6.72611e-07	666.6	8.4846e-06	666.6	2.00286e-05	666.6	8.65976e-05	666.6	3.4456e-05	666.6	7.75462e-05
666.8	6.42794e-05	666.8	0.00012205	666.8	8.65853e-05	666.8	8.12132e-06	666.8	7.11864e-05	666.8	5.78107e-05	666.8	9.25986e-07	666.8	3.73159e-05	666.8	0	666.8	2.24204e-06	666.8	8.4846e-06	666.8	2.00286e-05	666.8	8.65976e-05	666.8	3.4456e-05	666.8	7.75462e-05
667	6.42794e-05	667	0.000118079	667	6.93695e-05	667	7.55472e-06	667	7.46589e-05	667	4.53733e-05	667	9.25986e-07	667	3.73159e-05	667	0	667	2.91465e-06	667	1.47937e-05	667	1.57293e-05	667	7.7286e-05	667	3.4456e-05	667	7.54598e-05
667.2	6.42794e-05	667.2	0.000107658	667.2	6.4306e-05	667.2	8.12132e-06	667.2	5.72964e-05	667.2	4.00759e-05	667.2	1.01858e-05	667.2	3.43306e-05	667.2	5.05853e-06	667.2	3.58726e-06	667.2	1.47937e-05	667.2	1.84557e-05	667.2	7.7286e-05	667.2	3.4456e-05	667.2	7.54598e-05
667.4	6.13576e-05	667.4	0.000107161	667.4	0.000138739	667.4	1.13321e-05	667.4	4.86151e-05	667.4	3.59302e-05	667.4	2.40756e-05	667.4	3.32644e-05	667.4	1.16049e-05	667.4	4.82038e-06	667.4	1.47937e-05	667.4	1.70925e-05	667.4	7.7286e-05	667.4	2.77054e-05	667.4	7.54598e-05
667.6	5.09226e-05	667.6	0.000104184	667.6	7.84838e-05	667.6	1.26542e-05	667.6	4.86151e-05	667.6	3.2936e-05	667.6	2.68536e-05	667.6	2.98527e-05	667.6	2.79707e-05	667.6	2.80254e-06	667.6	1.47937e-05	667.6	1.67779e-05	667.6	6.98368e-05	667.6	2.77054e-05	667.6	7.54598e-05
667.8	4.46617e-05	667.8	0.000104184	667.8	6.4306e-05	667.8	2.32308e-05	667.8	5.72964e-05	667.8	2.94812e-05	667.8	2.68536e-05	667.8	2.89998e-05	667.8	2.79707e-05	667.8	3.13885e-06	667.8	1.47937e-05	667.8	1.70925e-05	667.8	6.98368e-05	667.8	2.41895e-05	667.8	7.71985e-05
668	4.38269e-05	668	0.000104184	668	8.9117e-05	668	2.90857e-05	668	6.42414e-05	668	2.78689e-05	668	4.07434e-05	668	1.57793e-05	668	2.79707e-05	668	5.04458e-06	668	1.47937e-05	668	1.84557e-05	668	6.98368e-05	668	2.34863e-05	668	7.71985e-05
668.2	4.38269e-05	668.2	0.000107658	668.2	6.32934e-05	668.2	3.2863e-05	668.2	6.42414e-05	668.2	2.78689e-05	668.2	2.68536e-05	668.2	1.57793e-05	668.2	2.79707e-05	668.2	4.48407e-06	668.2	2.04501e-05	668.2	1.84557e-05	668.2	6.28531e-05	668.2	2.34863e-05	668.2	7.71985e-05
668.4	4.38269e-05	668.4	0.000106169	668.4	0.000158487	668.4	3.58849e-05	668.4	6.42414e-05	668.4	2.78689e-05	668.4	2.68536e-05	668.4	1.57793e-05	668.4	3.06488e-05	668.4	3.58726e-06	668.4	2.67591e-05	668.4	2.56912e-05	668.4	7.07679e-05	668.4	2.37676e-05	668.4	7.71985e-05
668.6	5.09226e-05	668.6	0.000117087	668.6	0.000105826	668.6	3.58849e-05	668.6	6.42414e-05	668.6	2.78689e-05	668.6	2.40756e-05	668.6	1.57793e-05	668.6	3.06488e-05	668.6	7.06241e-06	668.6	3.28506e-05	668.6	3.00954e-05	668.6	6.28531e-05	668.6	2.33457e-05	668.6	7.02436e-05
668.8	4.75834e-05	668.8	0.000135449	668.8	3.54443e-05	668.8	3.98511e-05	668.8	6.42414e-05	668.8	2.78689e-05	668.8	1.01858e-05	668.8	3.07056e-05	668.8	3.33268e-05	668.8	6.1656e-06	668.8	3.74192e-05	668.8	3.00954e-05	668.8	6.09908e-05	668.8	2.33457e-05	668.8	7.02436e-05
669	4.75834e-05	669	0.000135449	669	0.000117472	669	3.98511e-05	669	4.51426e-05	669	2.78689e-05	669	9.25986e-07	669	3.07056e-05	669	3.33268e-05	669	4.25987e-06	669	3.74192e-05	669	3.00954e-05	669	6.09908e-05	669	1.87047e-05	669	6.92004e-05
669.2	4.75834e-05	669.2	0.000135449	669.2	9.31678e-05	669.2	3.2863e-05	669.2	4.51426e-05	669.2	2.78689e-05	669.2	0	669.2	3.07056e-05	669.2	4.37414e-05	669.2	5.26878e-06	669.2	4.00299e-05	669.2	3.00954e-05	669.2	6.09908e-05	669.2	1.87047e-05	669.2	6.92004e-05
669.4	4.75834e-05	669.4	0.000137434	669.4	0.000118485	669.4	3.07855e-05	669.4	4.51426e-05	669.4	3.17844e-05	669.4	0	669.4	3.07056e-05	669.4	4.37414e-05	669.4	8.29553e-06	669.4	3.89421e-05	669.4	2.04481e-05	669.4	6.61121e-05	669.4	1.547e-05	669.4	7.02436e-05
669.6	3.79833e-05	669.6	0.000130486	669.6	9.62059e-05	669.6	2.64415e-05	669.6	5.03514e-05	669.6	3.17844e-05	669.6	0	669.6	2.81468e-05	669.6	4.37414e-05	669.6	5.49299e-06	669.6	3.74192e-05	669.6	1.98189e-05	669.6	6.61121e-05	669.6	1.15322e-05	669.6	7.05914e-05
669.8	1.62785e-05	669.8	0.000130486	669.8	8.15218e-05	669.8	2.51194e-05	669.8	4.34064e-05	669.8	3.56998e-05	669.8	9.25986e-07	669.8	2.81468e-05	669.8	4.16585e-05	669.8	3.25095e-06	669.8	3.74192e-05	669.8	1.49953e-05	669.8	6.61121e-05	669.8	1.15322e-05	669.8	7.30256e-05
670	1.62785e-05	670	0.000130486	670	0.000163044	670	2.03977e-05	670	5.03514e-05	670	3.56998e-05	670	3.14835e-05	670	2.81468e-05	670	4.01707e-05	670	1.34522e-06	670	3.50262e-05	670	1.43661e-05	670	6.61121e-05	670	1.15322e-05	670	7.30256e-05
670.2	1.62785e-05	670.2	0.000126516	670.2	5.01283e-05	670.2	2.03977e-05	670.2	9.5494e-05	670.2	3.56998e-05	670.2	8.05608e-05	670.2	2.81468e-05	670.2	4.01707e-05	670.2	3.13885e-06	670.2	2.78469e-05	670.2	1.43661e-05	670.2	6.61121e-05	670.2	1.49075e-05	670.2	7.30256e-05
670.4	3.79833e-05	670.4	0.000127012	670.4	0.000134182	670.4	2.03977e-05	670.4	9.5494e-05	670.4	3.56998e-05	670.4	9.35246e-05	670.4	2.98527e-05	670.4	4.01707e-05	670.4	6.1656e-06	670.4	2.06676e-05	670.4	1.01716e-05	670.4	5.58694e-05	670.4	1.95485e-05	670.4	7.30256e-05
670.6	5.46792e-05	670.6	0.000115598	670.6	8.9117e-05	670.6	2.02089e-05	670.6	5.81645e-05	670.6	3.75424e-05	670.6	0.000102784	670.6	2.98527e-05	670.6	4.01707e-05	670.6	2.46624e-06	670.6	1.50112e-05	670.6	1.01716e-05	670.6	4.28332e-05	670.6	2.75648e-05	670.6	6.08546e-05
670.8	5.46792e-05	670.8	0.000115598	670.8	0.000115447	670.8	2.02089e-05	670.8	5.03514e-05	670.8	3.70818e-05	670.8	0.000102784	670.8	2.98527e-05	670.8	4.16585e-05	670.8	1.00892e-06	670.8	3.04575e-06	670.8	1.20591e-05	670.8	3.91086e-05	670.8	2.84086e-05	670.8	5.52908e-05
671	5.63488e-05	671	0.000114606	671	0.000108865	671	1.45428e-05	671	5.81645e-05	671	3.70818e-05	671	0.000113896	671	2.98527e-05	671	4.16585e-05	671	2.80254e-06	671	3.04575e-06	671	1.01716e-05	671	3.91086e-05	671	3.26277e-05	671	5.52908e-05
671.2	6.97056e-05	671.2	0.000114606	671.2	0.000106333	671.2	1.35985e-05	671.2	5.81645e-05	671.2	3.70818e-05	671.2	0.000113896	671.2	2.89998e-05	671.2	4.19561e-05	671.2	2.57834e-06	671.2	0	671.2	1.01716e-05	671.2	3.91086e-05	671.2	4.02221e-05	671.2	5.52908e-05
671.4	6.97056e-05	671.4	0.000110635	671.4	0.000185829	671.4	1.03877e-05	671.4	4.94832e-05	671.4	4.23792e-05	671.4	0.000114822	671.4	2.49483e-05	671.4	4.4039e-05	671.4	2.46624e-06	671.4	0	671.4	1.01716e-05	671.4	4.28332e-05	671.4	4.34567e-05	671.4	6.08546e-05
671.6	5.7601e-05	671.6	0.000109643	671.6	9.51932e-05	671.6	1.03877e-05	671.6	4.68789e-05	671.6	4.56037e-05	671.6	0.000143528	671.6	1.25808e-05	671.6	4.79073e-05	671.6	3.69936e-06	671.6	3.04575e-06	671.6	7.96951e-06	671.6	5.40071e-05	671.6	4.50038e-05	671.6	7.78939e-05
671.8	5.63488e-05	671.8	0.000105673	671.8	0.00014279	671.8	1.03877e-05	671.8	3.64613e-05	671.8	4.97494e-05	671.8	0.00015001	671.8	7.46318e-06	671.8	5.74292e-05	671.8	3.81146e-06	671.8	9.35481e-06	671.8	1.20591e-05	671.8	5.44727e-05	671.8	5.24575e-05	671.8	8.34578e-05
672	4.75834e-05	672	0.000105673	672	0.000102282	672	1.03877e-05	672	1.21538e-05	672	5.06707e-05	672	0.000157418	672	1.25808e-05	672	4.79073e-05	672	3.02675e-06	672	1.04426e-05	672	1.20591e-05	672	5.54038e-05	672	5.24575e-05	672	8.65875e-05
672.2	5.63488e-05	672.2	8.58214e-05	672.2	5.46855e-05	672.2	8.49906e-06	672.2	0	672.2	5.06707e-05	672.2	0.000177789	672.2	8.10288e-06	672.2	4.79073e-05	672.2	5.38088e-06	672.2	2.93698e-05	672.2	7.96951e-06	672.2	5.86629e-05	672.2	5.24575e-05	672.2	9.24991e-05
672.4	4.75834e-05	672.4	7.24219e-05	672.4	8.50663e-05	672.4	1.05766e-05	672.4	0	672.4	5.1592e-05	672.4	0.000191679	672.4	7.46318e-06	672.4	4.79073e-05	672.4	3.13885e-06	672.4	3.17628e-05	672.4	1.27932e-05	672.4	6.75089e-05	672.4	4.50038e-05	672.4	9.24991e-05
672.6	4.75834e-05	672.6	6.99405e-05	672.6	0.000163044	672.6	1.05766e-05	672.6	1.21538e-05	672.6	5.1592e-05	672.6	0.000197235	672.6	7.24994e-06	672.6	3.63024e-05	672.6	3.13885e-06	672.6	3.80719e-05	672.6	1.20591e-05	672.6	7.12335e-05	672.6	3.78313e-05	672.6	9.24991e-05
672.8	4.75834e-05	672.8	6.99405e-05	672.8	0.00011646	672.8	1.05766e-05	672.8	1.21538e-05	672.8	5.1592e-05	672.8	0.00023057	672.8	7.46318e-06	672.8	3.63024e-05	672.8	2.12993e-06	672.8	3.80719e-05	672.8	1.45758e-05	672.8	7.12335e-05	672.8	3.62843e-05	672.8	9.24991e-05
673	5.71836e-05	673	6.99405e-05	673	0.000114941	673	1.05766e-05	673	3.29888e-05	673	5.06707e-05	673	0.00023057	673	8.10288e-06	673	3.63024e-05	673	5.60509e-07	673	3.80719e-05	673	1.5205e-05	673	8.33385e-05	673	3.38935e-05	673	5.59863e-05
673.2	6.01054e-05	673.2	7.24219e-05	673.2	0.00017469	673.2	1.05766e-05	673.2	3.3857e-05	673.2	4.97494e-05	673.2	0.00023057	673.2	1.36469e-05	673.2	3.63024e-05	673.2	1.23312e-06	673.2	2.93698e-05	673.2	1.5205e-05	673.2	0.000102893	673.2	3.03775e-05	673.2	4.17289e-05
673.4	7.51318e-05	673.4	7.24219e-05	673.4	0.000151398	673.4	1.11432e-05	673.4	4.42745e-05	673.4	4.44521e-05	673.4	0.000191679	673.4	1.36469e-05	673.4	6.90341e-05	673.4	2.57834e-06	673.4	2.02325e-05	673.4	1.5205e-05	673.4	0.000102893	673.4	2.22206e-05	673.4	3.96425e-05
673.6	7.51318e-05	673.6	7.49033e-05	673.6	0.000102788	673.6	1.47317e-05	673.6	4.94832e-05	673.6	3.47785e-05	673.6	0.000112044	673.6	1.89778e-05	673.6	9.16487e-05	673.6	1.56942e-06	673.6	2.00149e-05	673.6	1.5205e-05	673.6	0.000102893	673.6	1.99704e-05	673.6	3.33831e-05
673.8	7.88884e-05	673.8	8.38363e-05	673.8	9.16488e-05	673.8	1.47317e-05	673.8	6.8582e-05	673.8	3.13237e-05	673.8	8.79687e-05	673.8	1.89778e-05	673.8	9.16487e-05	673.8	1.68153e-06	673.8	2.00149e-05	673.8	1.70925e-05	673.8	8.98566e-05	673.8	1.99704e-05	673.8	3.33831e-05
674	7.88884e-05	674	8.48288e-05	674	0.000133169	674	1.47317e-05	674	8.33402e-05	674	2.34928e-05	674	7.03749e-05	674	1.89778e-05	674	9.16487e-05	674	1.00892e-06	674	2.00149e-05	674	1.70925e-05	674	8.33385e-05	674	1.99704e-05	674	3.96425e-05
674.2	9.09929e-05	674.2	0.000102199	674.2	0.000123042	674.2	1.47317e-05	674.2	9.46259e-05	674.2	1.79651e-05	674.2	4.62993e-05	674.2	2.26028e-05	674.2	9.16487e-05	674.2	0	674.2	2.02325e-05	674.2	1.37369e-05	674.2	4.56267e-05	674.2	1.99704e-05	674.2	4.13812e-05
674.4	8.22275e-05	674.4	0.000123042	674.4	0.000111903	674.4	1.4354e-05	674.4	0.000105912	674.4	8.06125e-06	674.4	4.62993e-05	674.4	1.89778e-05	674.4	7.40926e-05	674.4	2.57834e-06	674.4	2.02325e-05	674.4	1.37369e-05	674.4	3.95742e-05	674.4	2.54552e-05	674.4	4.13812e-05
674.6	7.88884e-05	674.6	0.000125027	674.6	0.000162537	674.6	1.4354e-05	674.6	0.000108516	674.6	3.91547e-06	674.6	3.88914e-05	674.6	2.26028e-05	674.6	6.18926e-05	674.6	1.34522e-06	674.6	2.80644e-05	674.6	1.37369e-05	674.6	3.07282e-05	674.6	3.07994e-05	674.6	3.33831e-05
674.8	7.8471e-05	674.8	0.000125027	674.8	7.49393e-05	674.8	8.87679e-06	674.8	0.000133692	674.8	8.06125e-06	674.8	3.88914e-05	674.8	2.15366e-05	674.8	6.18926e-05	674.8	2.24204e-06	674.8	2.80644e-05	674.8	1.898e-05	674.8	2.56068e-05	674.8	3.07994e-05	674.8	3.26876e-05
675	7.8471e-05	675	0.000127012	675	5.77235e-05	675	8.87679e-06	675	0.000151922	675	8.06125e-06	675	3.88914e-05	675	2.15366e-05	675	6.18926e-05	675	3.69936e-06	675	2.80644e-05	675	1.898e-05	675	2.00199e-05	675	3.07994e-05	675	2.19077e-05
675.2	6.92882e-05	675.2	0.000127012	675.2	7.69647e-05	675.2	8.87679e-06	675.2	0.000151922	675.2	8.06125e-06	675.2	4.07434e-05	675.2	2.26028e-05	675.2	6.18926e-05	675.2	3.13885e-06	675.2	2.39309e-05	675.2	1.68828e-05	675.2	2.00199e-05	675.2	3.07994e-05	675.2	1.94735e-05
675.4	6.55316e-05	675.4	0.000127012	675.4	7.29139e-05	675.4	1.32208e-05	675.4	0.000151922	675.4	1.10554e-05	675.4	4.07434e-05	675.4	2.40954e-05	675.4	6.21902e-05	675.4	4.70827e-06	675.4	2.39309e-05	675.4	1.898e-05	675.4	2.00199e-05	675.4	2.43302e-05	675.4	1.94735e-05
675.6	6.55316e-05	675.6	0.000127012	675.6	4.75966e-05	675.6	1.32208e-05	675.6	0.000151922	675.6	1.3589e-05	675.6	5.55592e-05	675.6	2.26028e-05	675.6	6.24877e-05	675.6	2.69044e-06	675.6	2.39309e-05	675.6	1.93995e-05	675.6	2.00199e-05	675.6	2.43302e-05	675.6	1.8778e-05
675.8	6.21924e-05	675.8	0.000125027	675.8	7.13949e-05	675.8	1.7187e-05	675.8	0.000126747	675.8	1.79651e-05	675.8	7.50049e-05	675.8	2.26028e-05	675.8	6.24877e-05	675.8	4.70827e-06	675.8	2.39309e-05	675.8	1.93995e-05	675.8	2.14166e-05	675.8	1.94079e-05	675.8	1.8778e-05
676	5.88532e-05	676	0.000125027	676	5.41791e-05	676	2.54972e-05	676	0.000116329	676	1.79651e-05	676	8.33387e-05	676	2.15366e-05	676	6.24877e-05	676	2.35414e-06	676	2.39309e-05	676	1.71974e-05	676	2.14166e-05	676	1.43449e-05	676	1.8778e-05
676.2	5.42618e-05	676.2	0.000127012	676.2	0	676.2	2.54972e-05	676.2	0.000115461	676.2	1.79651e-05	676.2	0.000118526	676.2	2.11101e-05	676.2	6.24877e-05	676.2	1.56942e-06	676.2	2.39309e-05	676.2	1.68828e-05	676.2	2.00199e-05	676.2	1.25167e-05	676.2	1.94735e-05
676.4	5.42618e-05	676.4	0.000127012	676.4	0.000125068	676.4	2.54972e-05	676.4	0.00010678	676.4	1.3589e-05	676.4	0.000118526	676.4	2.11101e-05	676.4	3.4517e-05	676.4	2.12993e-06	676.4	2.41485e-05	676.4	1.68828e-05	676.4	0	676.4	1.43449e-05	676.4	2.0169e-05
676.6	5.42618e-05	676.6	0.000131975	676.6	6.02553e-05	676.6	2.54972e-05	676.6	9.89665e-05	676.6	1.17464e-05	676.6	0.000124082	676.6	1.89778e-05	676.6	3.24341e-05	676.6	2.24204e-06	676.6	2.41485e-05	676.6	1.68828e-05	676.6	2.14166e-05	676.6	1.50481e-05	676.6	3.23399e-05
676.8	3.58963e-05	676.8	0.000131975	676.8	0.00013165	676.8	1.69981e-05	676.8	0.00010678	676.8	1.3589e-05	676.8	0.000124082	676.8	1.81249e-05	676.8	3.24341e-05	676.8	3.36305e-06	676.8	2.39309e-05	676.8	1.16397e-05	676.8	1.62952e-05	676.8	1.71577e-05	676.8	3.51218e-05
677	3.13049e-05	677	0.000131975	677	0.000128612	677	1.34096e-05	677	0.000115461	677	1.17464e-05	677	0.000124082	677	1.81249e-05	677	3.24341e-05	677	3.02675e-06	677	1.78394e-05	677	1.16397e-05	677	1.62952e-05	677	1.71577e-05	677	3.51218e-05
677.2	3.13049e-05	677.2	0.000131975	677.2	8.96234e-05	677.2	1.18987e-05	677.2	0.00010678	677.2	1.17464e-05	677.2	0.000121304	677.2	1.81249e-05	677.2	3.24341e-05	677.2	2.12993e-06	677.2	1.78394e-05	677.2	9.22786e-06	677.2	1.62952e-05	677.2	1.71577e-05	677.2	4.24244e-05
677.4	3.13049e-05	677.4	0.000115598	677.4	0.000127093	677.4	1.18987e-05	677.4	9.20215e-05	677.4	1.3589e-05	677.4	0.000120378	677.4	1.81249e-05	677.4	3.71951e-05	677.4	1.34522e-06	677.4	1.26181e-05	677.4	9.22786e-06	677.4	2.60724e-05	677.4	2.08142e-05	677.4	4.24244e-05
677.6	3.13049e-05	677.6	0.000111132	677.6	9.26615e-05	677.6	1.07655e-05	677.6	9.20215e-05	677.6	1.3589e-05	677.6	0.000120378	677.6	1.89778e-05	677.6	4.82048e-05	677.6	1.23312e-06	677.6	1.26181e-05	677.6	9.22786e-06	677.6	4.09709e-05	677.6	2.47521e-05	677.6	4.10334e-05
677.8	3.13049e-05	677.8	0.000103687	677.8	0.000145322	677.8	1.18987e-05	677.8	9.20215e-05	677.8	1.52012e-05	677.8	0.000121304	677.8	1.89778e-05	677.8	5.17756e-05	677.8	2.91465e-06	677.8	1.26181e-05	677.8	1.31078e-05	677.8	4.93513e-05	677.8	2.70023e-05	677.8	4.10334e-05
678	3.13049e-05	678	0.000102199	678	5.97489e-05	678	1.20876e-05	678	0.00010678	678	1.52012e-05	678	0.000120378	678	1.68455e-05	678	5.23707e-05	678	3.25095e-06	678	1.26181e-05	678	1.69876e-05	678	4.98169e-05	678	2.70023e-05	678	3.99902e-05
678.2	3.13049e-05	678.2	9.47544e-05	678.2	6.58251e-05	678.2	1.34096e-05	678.2	0.000100703	678.2	2.02683e-05	678.2	0.000121304	678.2	2.11101e-05	678.2	7.43902e-05	678.2	3.25095e-06	678.2	2.37134e-05	678.2	1.69876e-05	678.2	5.91285e-05	678.2	2.47521e-05	678.2	3.99902e-05
678.4	3.38093e-05	678.4	9.47544e-05	678.4	5.1141e-05	678.4	1.39762e-05	678.4	9.20215e-05	678.4	2.46444e-05	678.4	0.000121304	678.4	3.1985e-05	678.4	7.43902e-05	678.4	4.25987e-06	678.4	2.56713e-05	678.4	1.74071e-05	678.4	6.5181e-05	678.4	2.33457e-05	678.4	4.10334e-05
678.6	3.38093e-05	678.6	0.000102199	678.6	6.07616e-05	678.6	1.62426e-05	678.6	9.72302e-05	678.6	2.46444e-05	678.6	0.000127786	678.6	3.51835e-05	678.6	7.43902e-05	678.6	4.93248e-06	678.6	2.8282e-05	678.6	1.8246e-05	678.6	6.79744e-05	678.6	2.08142e-05	678.6	4.10334e-05
678.8	4.34095e-05	678.8	0.000102199	678.8	7.4433e-05	678.8	2.34196e-05	678.8	0.000100703	678.8	2.67173e-05	678.8	0.000130564	678.8	3.51835e-05	678.8	7.43902e-05	678.8	1.56942e-06	678.8	2.8282e-05	678.8	1.85606e-05	678.8	7.07679e-05	678.8	2.33457e-05	678.8	4.38153e-05
679	7.72188e-05	679	8.97916e-05	679	5.87362e-05	679	2.60638e-05	679	0.000100703	679	3.36269e-05	679	0.000137972	679	3.1985e-05	679	7.1117e-05	679	7.06241e-06	679	2.56713e-05	679	1.85606e-05	679	8.24074e-05	679	2.27832e-05	679	5.35521e-05
679.2	7.72188e-05	679.2	8.97916e-05	679.2	0.000135195	679.2	2.60638e-05	679.2	0.00012067	679.2	3.9385e-05	679.2	0.000183345	679.2	3.17718e-05	679.2	6.09999e-05	679.2	5.82929e-06	679.2	2.56713e-05	679.2	1.85606e-05	679.2	9.26501e-05	679.2	1.98298e-05	679.2	5.35521e-05
679.4	7.72188e-05	679.4	8.97916e-05	679.4	0.000146334	679.4	2.60638e-05	679.4	0.000100703	679.4	3.9385e-05	679.4	0.000183345	679.4	3.17718e-05	679.4	5.11804e-05	679.4	4.03566e-06	679.4	2.89347e-05	679.4	1.898e-05	679.4	9.63747e-05	679.4	1.91266e-05	679.4	5.56385e-05
679.6	7.72188e-05	679.6	8.97916e-05	679.6	7.79774e-05	679.6	2.60638e-05	679.6	9.72302e-05	679.6	3.9385e-05	679.6	0.000192605	679.6	1.79116e-05	679.6	4.49317e-05	679.6	6.72611e-06	679.6	2.69767e-05	679.6	2.77884e-05	679.6	0.000109411	679.6	1.91266e-05	679.6	5.4943e-05
679.8	5.59314e-05	679.8	8.97916e-05	679.8	6.78505e-05	679.8	2.60638e-05	679.8	9.72302e-05	679.8	3.9385e-05	679.8	0.000192605	679.8	1.79116e-05	679.8	4.49317e-05	679.8	7.28661e-06	679.8	2.69767e-05	679.8	2.60058e-05	679.8	0.000109411	679.8	1.91266e-05	679.8	5.4943e-05
680	4.63313e-05	680	8.97916e-05	680	4.86093e-05	680	2.60638e-05	680	7.20546e-05	680	1.61225e-05	680	0.000183345	680	1.79116e-05	680	2.82683e-05	680	5.94139e-06	680	2.69767e-05	680	2.60058e-05	680	0.000109411	680	1.94079e-05	680	5.4943e-05
680.2	4.63313e-05	680.2	0.000101206	680.2	0.000154436	680.2	2.60638e-05	680.2	7.20546e-05	680.2	1.54315e-05	680.2	0.000171307	680.2	1.79116e-05	680.2	2.55902e-05	680.2		680.2	2.69767e-05	680.2	1.898e-05	680.2	0.000123378	680.2	1.94079e-05	680.2	5.98114e-05
680.4	4.63313e-05	680.4	0.000105673	680.4	0.000117472	680.4	2.83302e-05	680.4	7.20546e-05	680.4	1.17464e-05	680.4	0.00015927	680.4	1.79116e-05	680.4	2.29122e-05	680.4		680.4	2.69767e-05	680.4	1.898e-05	680.4	0.000127568	680.4	1.77202e-05	680.4	5.4943e-05
680.6	4.42443e-05	680.6	0.000101206	680.6	9.01297e-05	680.6	2.83302e-05	680.6	7.20546e-05	680.6	1.17464e-05	680.6	0.000146306	680.6	1.79116e-05	680.6	2.20195e-05	680.6		680.6	2.84995e-05	680.6	1.898e-05	680.6	0.000127568	680.6	1.94079e-05	680.6	5.98114e-05
680.8	4.42443e-05	680.8	0.000105673	680.8	0.000181272	680.8	2.47417e-05	680.8	0.000128483	680.8	1.05948e-05	680.8	0.000137046	680.8	1.85513e-05	680.8	9.52194e-06	680.8		680.8	2.84995e-05	680.8	1.84557e-05	680.8	0.000127568	680.8	1.95485e-05	680.8	5.98114e-05
681	4.96704e-05	681	0.000110139	681	5.62045e-05	681	2.47417e-05	681	0.000128483	681	1.17464e-05	681	0.000120378	681	2.77204e-05	681	9.52194e-06	681		681	2.84995e-05	681	1.84557e-05	681	0.000117791	681	2.23612e-05	681	6.36366e-05
681.2	6.21924e-05	681.2	0.000118576	681.2	6.83568e-05	681.2	2.62526e-05	681.2	0.000128483	681.2	1.42799e-05	681.2	0.000111118	681.2	1.87646e-05	681.2	9.52194e-06	681.2		681.2	1.8057e-05	681.2	1.84557e-05	681.2	0.000117791	681.2	2.3627e-05	681.2	6.36366e-05
681.4	7.0123e-05	681.4	0.000118576	681.4	0.000128612	681.4	2.41751e-05	681.4	0.000128483	681.4	1.42799e-05	681.4	0.000101858	681.4	1.87646e-05	681.4	9.52194e-06	681.4		681.4	1.8057e-05	681.4	1.84557e-05	681.4	9.63747e-05	681.4	2.3627e-05	681.4	8.03281e-05
681.6	6.21924e-05	681.6	0.000118576	681.6	6.93695e-05	681.6	1.96423e-05	681.6	0.000133692	681.6	1.88864e-05	681.6	8.98206e-05	681.6	2.75071e-05	681.6	2.61853e-05	681.6		681.6	2.61065e-05	681.6	2.07627e-05	681.6	9.12534e-05	681.6	2.23612e-05	681.6	8.03281e-05
681.8	7.6384e-05	681.8	0.000129494	681.8	6.98759e-05	681.8	1.7187e-05	681.8	0.00011112	681.8	2.5105e-05	681.8	5.83371e-05	681.8	3.30512e-05	681.8	3.15414e-05	681.8		681.8	3.04575e-05	681.8	2.07627e-05	681.8	8.10106e-05	681.8	2.3627e-05	681.8	8.03281e-05
682	8.18101e-05	682	0.000129494	682	0.000123549	682	1.69981e-05	682	8.76808e-05	682	2.5105e-05	682	5.83371e-05	682	3.30512e-05	682	3.30292e-05	682		682	3.04575e-05	682	2.17064e-05	682	6.28531e-05	682	2.61584e-05	682	6.36366e-05
682.2	8.18101e-05	682.2	0.000131975	682.2	8.35472e-05	682.2	1.69981e-05	682.2	7.72633e-05	682.2	2.87902e-05	682.2	5.83371e-05	682.2	3.04924e-05	682.2	7.26048e-05	682.2		682.2	3.04575e-05	682.2	2.17064e-05	682.2	3.16593e-05	682.2	2.61584e-05	682.2	5.56385e-05
682.4	8.18101e-05	682.4	0.000128005	682.4	4.45585e-05	682.4	1.4354e-05	682.4	7.11864e-05	682.4	2.94812e-05	682.4	5.83371e-05	682.4	2.75071e-05	682.4	7.26048e-05	682.4		682.4	3.30682e-05	682.4	2.17064e-05	682.4	3.16593e-05	682.4	3.48779e-05	682.4	5.52908e-05
682.6	7.76362e-05	682.6	0.000120561	682.6	0.000152917	682.6	1.39762e-05	682.6	7.11864e-05	682.6	2.94812e-05	682.6	3.24095e-05	682.6	2.75071e-05	682.6	7.26048e-05	682.6		682.6	3.30682e-05	682.6	2.02384e-05	682.6	3.16593e-05	682.6	3.48779e-05	682.6	5.45953e-05
682.8	6.55316e-05	682.8	0.000120561	682.8	0.000141777	682.8	1.15209e-05	682.8	5.72964e-05	682.8	2.94812e-05	682.8	3.24095e-05	682.8	2.98527e-05	682.8	7.26048e-05	682.8		682.8	3.30682e-05	682.8	2.01335e-05	682.8	3.16593e-05	682.8	3.95189e-05	682.8	4.8336e-05
683	6.55316e-05	683	0.000120561	683	0.000125068	683	1.09543e-05	683	2.25713e-05	683	2.5105e-05	683	5.92631e-05	683	2.72939e-05	683	6.99268e-05	683		683	3.30682e-05	683	1.88752e-05	683	4.00397e-05	683	4.14878e-05	683	4.17289e-05
683.2	6.42794e-05	683.2	0.000105673	683.2	8.10155e-05	683.2	9.06566e-06	683.2	2.08351e-05	683.2	2.5105e-05	683.2	5.92631e-05	683.2	2.40954e-05	683.2	6.96292e-05	683.2		683.2	2.8282e-05	683.2	1.74071e-05	683.2	6.89056e-05	683.2	4.2191e-05	683.2	4.06857e-05
683.4	6.30272e-05	683.4	0.000102199	683.4	2.73427e-05	683.4	9.06566e-06	683.4	2.60438e-06	683.4	2.5105e-05	683.4	6.20411e-05	683.4	1.98307e-05	683.4	3.9278e-05	683.4		683.4	2.19729e-05	683.4	1.61488e-05	683.4	7.21647e-05	683.4	4.2191e-05	683.4	2.71238e-05
683.6	2.79657e-05	683.6	9.72358e-05	683.6	6.88632e-05	683.6	1.05766e-05	683.6	1.47582e-05	683.6	2.5105e-05	683.6	7.59308e-05	683.6	2.40954e-05	683.6	3.27317e-05	683.6		683.6	1.91447e-05	683.6	1.61488e-05	683.6	7.35614e-05	683.6	4.2191e-05	683.6	0
683.8	2.04525e-05	683.8	9.72358e-05	683.8	0.000108865	683.8	6.98811e-06	683.8	1.47582e-05	683.8	2.5105e-05	683.8	9.16726e-05	683.8	2.40954e-05	683.8	3.27317e-05	683.8		683.8	1.74043e-05	683.8	1.58342e-05	683.8	7.63549e-05	683.8	4.41599e-05	683.8	0
684	4.17399e-07	684	9.82284e-05	684	4.60776e-05	684	4.1551e-06	684	1.47582e-05	684	2.78689e-05	684	9.63025e-05	684	2.70807e-05	684	3.27317e-05	684		684	1.50112e-05	684	1.30029e-05	684	9.45124e-05	684	4.92229e-05	684	0
684.2	4.17399e-07	684.2	9.82284e-05	684.2	0.000153423	684.2	4.1551e-06	684.2	1.47582e-05	684.2	3.45482e-05	684.2	0.000100006	684.2	2.70807e-05	684.2	3.39219e-05	684.2		684.2	1.30532e-05	684.2	1.30029e-05	684.2	9.8237e-05	684.2	5.56921e-05	684.2	0
684.4	4.17399e-07	684.4	9.72358e-05	684.4	6.22807e-05	684.4	8.87679e-06	684.4	1.47582e-05	684.4	3.98456e-05	684.4	0.000100006	684.4	2.40954e-05	684.4	3.39219e-05	684.4		684.4	3.91597e-06	684.4	1.30029e-05	684.4	9.8237e-05	684.4	5.56921e-05	684.4	1.63438e-05
684.6	1.4609e-05	684.6	9.67395e-05	684.6	0.000143296	684.6	8.87679e-06	684.6	5.03514e-05	684.6	4.46824e-05	684.6	0.000123156	684.6	2.02572e-05	684.6	3.39219e-05	684.6		684.6	3.91597e-06	684.6	1.86654e-05	684.6	9.8237e-05	684.6	4.92229e-05	684.6	2.43419e-05
684.8	1.4609e-05	684.8	8.18512e-05	684.8	0.000115447	684.8	3.21076e-06	684.8	5.38239e-05	684.8	4.46824e-05	684.8	0.000133342	684.8	2.02572e-05	684.8	3.39219e-05	684.8		684.8	3.91597e-06	684.8	1.86654e-05	684.8	9.8237e-05	684.8	4.57069e-05	684.8	2.57328e-05
685	1.66959e-05	685	8.03623e-05	685	3.54443e-05	685	0	685	5.72964e-05	685	4.46824e-05	685	0.000133342	685	2.02572e-05	685	3.86829e-05	685		685	3.91597e-06	685	1.43661e-05	685	9.35813e-05	685	4.57069e-05	685	3.37309e-05
685.2	1.71133e-05	685.2	7.83772e-05	685.2	6.78505e-05	685.2	0	685.2	5.99008e-05	685.2	3.98456e-05	685.2	0.000133342	685.2	2.36689e-05	685.2	4.46341e-05	685.2		685.2	6.09151e-06	685.2	1.43661e-05	685.2	8.79943e-05	685.2	4.57069e-05	685.2	4.17289e-05
685.4	2.12873e-05	685.4	7.83772e-05	685.4	9.46869e-05	685.4	5.09944e-06	685.4	8.1604e-05	685.4	3.98456e-05	685.4	0.000133342	685.4	2.36689e-05	685.4	3.86829e-05	685.4		685.4	1.04426e-05	685.4	1.43661e-05	685.4	6.75089e-05	685.4	4.57069e-05	685.4	4.6945e-05
685.6	2.12873e-05	685.6	7.83772e-05	685.6	9.31678e-05	685.6	4.7217e-06	685.6	8.1604e-05	685.6	2.02683e-05	685.6	0.000133342	685.6	2.36689e-05	685.6	3.60048e-05	685.6		685.6	4.28581e-05	685.6	6.71117e-06	685.6	6.75089e-05	685.6	4.57069e-05	685.6	8.93694e-05
685.8	2.71309e-05	685.8	8.92954e-05	685.8	4.25331e-05	685.8	4.7217e-06	685.8	8.1604e-05	685.8	1.70438e-05	685.8	0.000134268	685.8	2.43086e-05	685.8	3.68975e-05	685.8		685.8	4.41634e-05	685.8	6.18686e-06	685.8	6.56466e-05	685.8	4.62695e-05	685.8	0.000102236
686	3.13049e-05	686	8.92954e-05	686	8.50663e-05	686	5.09944e-06	686	8.1604e-05	686	1.70438e-05	686	0.000174085	686	2.43086e-05	686	4.6717e-05	686		686	5.39533e-05	686	6.18686e-06	686	6.75089e-05	686	4.62695e-05	686	0.000102236
686.2	4.54965e-05	686.2	9.67395e-05	686.2	4.00014e-05	686.2	9.4434e-06	686.2	8.94171e-05	686.2	1.70438e-05	686.2	0.000174085	686.2	3.66762e-05	686.2	4.93951e-05	686.2		686.2	5.39533e-05	686.2	6.18686e-06	686.2	7.91483e-05	686.2	4.62695e-05	686.2	0.000102236
686.4	4.54965e-05	686.4	0.00014736	686.4	9.97503e-05	686.4	9.82113e-06	686.4	8.94171e-05	686.4	2.02683e-05	686.4	0.000174085	686.4	3.17718e-05	686.4	4.25512e-05	686.4		686.4	4.41634e-05	686.4	6.18686e-06	686.4	7.91483e-05	686.4	4.62695e-05	686.4	0.000102236
686.6	4.54965e-05	686.6	0.00014736	686.6	8.40536e-05	686.6	9.4434e-06	686.6	9.46259e-05	686.6	2.76386e-05	686.6	0.000174085	686.6	3.66762e-05	686.6	3.68975e-05	686.6		686.6	4.41634e-05	686.6	6.18686e-06	686.6	7.96139e-05	686.6	3.65655e-05	686.6	9.07604e-05
686.8	4.54965e-05	686.8	0.00014736	686.8	7.49393e-05	686.8	1.15209e-05	686.8	9.46259e-05	686.8	4.16882e-05	686.8	5.83371e-05	686.8	3.66762e-05	686.8	3.68975e-05	686.8		686.8	3.32857e-05	686.8	5.34796e-06	686.8	8.24074e-05	686.8	3.65655e-05	686.8	9.00649e-05
687	3.79833e-05	687	0.000118576	687	7.29139e-05	687	1.15209e-05	687	9.46259e-05	687	4.16882e-05	687	3.42615e-05	687	3.41174e-05	687	3.68975e-05	687		687	3.26331e-05	687	5.34796e-06	687	8.24074e-05	687	3.64249e-05	687	8.17191e-05
687.2	2.96353e-05	687.2	0.000107658	687.2	0.000120004	687.2	1.39762e-05	687.2	9.46259e-05	687.2	4.16882e-05	687.2	3.42615e-05	687.2	3.17718e-05	687.2	3.36244e-05	687.2		687.2	2.58889e-05	687.2	5.34796e-06	687.2	8.24074e-05	687.2	3.62843e-05	687.2	7.92849e-05
687.4	2.96353e-05	687.4	0.000107658	687.4	5.26601e-05	687.4	1.30319e-05	687.4	6.77139e-05	687.4	4.16882e-05	687.4	3.42615e-05	687.4	3.17718e-05	687.4	3.33268e-05	687.4		687.4	2.4366e-05	687.4	0	687.4	8.24074e-05	687.4	3.6003e-05	687.4	7.92849e-05
687.6	2.96353e-05	687.6	0.000118576	687.6	9.21551e-05	687.6	1.30319e-05	687.6	6.77139e-05	687.6	3.54695e-05	687.6	3.42615e-05	687.6	2.43086e-05	687.6	2.94585e-05	687.6		687.6	2.19729e-05	687.6	0	687.6	7.54237e-05	687.6	3.6003e-05	687.6	7.58075e-05
687.8	2.96353e-05	687.8	0.000118576	687.8	0.000123549	687.8	1.24653e-05	687.8	6.77139e-05	687.8	3.38573e-05	687.8	7.87088e-05	687.8	1.9191e-05	687.8	2.82683e-05	687.8		687.8	1.76219e-05	687.8	0	687.8	7.54237e-05	687.8	3.6003e-05	687.8	6.92004e-05
688	3.96529e-05	688	0.000123539	688	0.000100257	688	1.24653e-05	688	6.77139e-05	688	3.2936e-05	688	8.14868e-05	688	1.13014e-05	688	2.82683e-05	688		688	1.76219e-05	688	0	688	7.54237e-05	688	3.64249e-05	688	6.5723e-05
688.2	3.96529e-05	688.2	0.000123539	688.2	0.000163044	688.2	9.63227e-06	688.2	9.98346e-05	688.2	2.85599e-05	688.2	8.61167e-05	688.2	1.10881e-05	688.2	2.82683e-05	688.2		688.2	1.76219e-05	688.2	3.98476e-06	688.2	7.54237e-05	688.2	3.27684e-05	688.2	6.5723e-05
688.4	4.46617e-05	688.4	0.00012999	688.4	3.54443e-06	688.4	9.63227e-06	688.4	9.98346e-05	688.4	2.02683e-05	688.4	0.000100932	688.4	6.39701e-06	688.4	2.82683e-05	688.4		688.4	1.76219e-05	688.4	1.18494e-05	688.4	8.42697e-05	688.4	3.69875e-05	688.4	6.5723e-05
688.6	4.46617e-05	688.6	0.00012999	688.6	9.46869e-05	688.6	1.32208e-06	688.6	9.98346e-05	688.6	8.29157e-06	688.6	0.000112044	688.6	6.39701e-06	688.6	2.82683e-05	688.6		688.6	2.50187e-05	688.6	1.48904e-05	688.6	8.42697e-05	688.6	3.69875e-05	688.6	6.5723e-05
688.8	5.67662e-05	688.8	0.000123539	688.8	0.000128612	688.8	1.32208e-06	688.8	9.98346e-05	688.8	7.60061e-06	688.8	0.000100932	688.8	6.39701e-06	688.8	2.82683e-05	688.8		688.8	2.50187e-05	688.8	1.79314e-05	688.8	8.93911e-05	688.8	3.69875e-05	688.8	8.41533e-05
689	5.67662e-05	689	0.000119568	689	0.000111396	689	1.32208e-06	689	9.20215e-05	689	1.15161e-06	689	8.61167e-05	689	6.39701e-06	689	2.97561e-05	689		689	2.50187e-05	689	1.79314e-05	689	8.98566e-05	689	3.27684e-05	689	8.41533e-05
689.2	5.67662e-05	689.2	0.000119568	689.2	0.000118991	689.2	1.32208e-06	689.2	9.20215e-05	689.2	0	689.2	8.61167e-05	689.2	2.02572e-05	689.2	2.97561e-05	689.2		689.2	2.50187e-05	689.2	1.79314e-05	689.2	8.93911e-05	689.2	3.00963e-05	689.2	8.41533e-05
689.4	6.13576e-05	689.4	0.000116591	689.4	0.000106333	689.4	5.47717e-06	689.4	9.20215e-05	689.4	0	689.4	8.61167e-05	689.4	2.02572e-05	689.4	2.97561e-05	689.4		689.4	2.15378e-05	689.4	1.79314e-05	689.4	8.47353e-05	689.4	2.57365e-05	689.4	8.41533e-05
689.6	6.13576e-05	689.6	0.000113117	689.6	6.2787e-05	689.6	5.47717e-06	689.6	9.20215e-05	689.6	1.15161e-06	689.6	7.03749e-05	689.6	2.60145e-05	689.6	3.09463e-05	689.6		689.6	2.15378e-05	689.6	1.79314e-05	689.6	8.42697e-05	689.6	2.17987e-05	689.6	7.16346e-05
689.8	5.67662e-05	689.8	0.00010071	689.8	0.000124561	689.8	6.98811e-06	689.8	0.000149318	689.8	1.15161e-06	689.8	6.5745e-05	689.8	3.2838e-05	689.8	3.48146e-05	689.8		689.8	2.15378e-05	689.8	1.79314e-05	689.8	8.10106e-05	689.8	2.13768e-05	689.8	6.85049e-05
690	5.67662e-05	690	0.00010071	690	0.000133676	690	8.49906e-06	690	0.000149318	690	2.69476e-05	690	6.5745e-05	690	4.17938e-05	690	3.48146e-05	690		690	2.15378e-05	690	1.74071e-05	690	5.72661e-05	690	2.06736e-05	690	5.21611e-05
690.2	5.67662e-05	690.2	0.000100213	690.2	3.84824e-05	690.2	8.49906e-06	690.2	0.000167549	690.2	3.38573e-05	690.2	6.5745e-05	690.2	4.17938e-05	690.2	3.48146e-05	690.2		690.2	2.56713e-05	690.2	1.74071e-05	690.2	5.72661e-05	690.2	1.87047e-05	690.2	5.21611e-05
690.4	5.59314e-05	690.4	0.00010071	690.4	0.000115953	690.4	1.4354e-05	690.4	0.000167549	690.4	3.40876e-05	690.4	6.01891e-05	690.4	4.17938e-05	690.4	4.46341e-05	690.4		690.4	2.56713e-05	690.4	1.5939e-05	690.4	5.72661e-05	690.4	1.87047e-05	690.4	5.21611e-05
690.6	4.67487e-05	690.6	0.000100213	690.6	2.43046e-05	690.6	1.92645e-05	690.6	0.000167549	690.6	3.40876e-05	690.6	6.01891e-05	690.6	4.17938e-05	690.6	5.50487e-05	690.6		690.6	2.56713e-05	690.6	1.65682e-05	690.6	5.6335e-05	690.6	1.87047e-05	690.6	4.65973e-05
690.8	4.50791e-05	690.8	0.000100213	690.8	7.74711e-05	690.8	2.36085e-05	690.8	0.000167549	690.8	3.40876e-05	690.8	6.01891e-05	690.8	4.17938e-05	690.8	5.74292e-05	690.8		690.8	2.56713e-05	690.8	1.55196e-05	690.8	5.6335e-05	690.8	1.87047e-05	690.8	4.65973e-05
691	4.67487e-05	691	0.000100213	691	0.000107346	691	2.54972e-05	691	0.000126747	691	3.40876e-05	691	6.01891e-05	691	4.47791e-05	691	6.39755e-05	691		691	2.56713e-05	691	1.55196e-05	691	6.42498e-05	691	1.87047e-05	691	5.70295e-05
691.2	4.63313e-05	691.2	9.37619e-05	691.2	0.000128612	691.2	2.58749e-05	691.2	0.000125878	691.2	2.46444e-05	691.2	5.64851e-05	691.2	4.47791e-05	691.2	7.14146e-05	691.2		691.2	3.024e-05	691.2	1.60439e-05	691.2	7.03023e-05	691.2	2.208e-05	691.2	5.70295e-05
691.4	4.63313e-05	691.4	9.2273e-05	691.4	4.20268e-05	691.4	2.75747e-05	691.4	0.000123274	691.4	2.46444e-05	691.4	5.64851e-05	691.4	3.90217e-05	691.4	7.14146e-05	691.4		691.4	2.48011e-05	691.4	1.60439e-05	691.4	7.12335e-05	691.4	2.22206e-05	691.4	5.70295e-05
691.6	4.50791e-05	691.6	9.2273e-05	691.6	7.29139e-05	691.6	3.22964e-05	691.6	0.00011112	691.6	2.46444e-05	691.6	5.64851e-05	691.6	3.30512e-05	691.6	7.14146e-05	691.6		691.6	2.48011e-05	691.6	1.60439e-05	691.6	8.2873e-05	691.6	2.43302e-05	691.6	5.42476e-05
691.8	3.84007e-05	691.8	9.2273e-05	691.8	2.43046e-05	691.8	3.22964e-05	691.8	0.000105912	691.8	2.37231e-05	691.8	6.94489e-05	691.8	2.85733e-05	691.8	7.14146e-05	691.8		691.8	2.48011e-05	691.8	1.65682e-05	691.8	8.05451e-05	691.8	2.84086e-05	691.8	5.42476e-05
692	2.62961e-05	692	9.37619e-05	692	1.87348e-05	692	3.22964e-05	692	0.000105912	692	2.46444e-05	692	8.61167e-05	692	2.85733e-05	692	3.95756e-05	692		692	2.48011e-05	692	1.76168e-05	692	8.2873e-05	692	3.15026e-05	692	6.12024e-05
692.2	3.84007e-05	692.2	0.000105673	692.2	6.48124e-05	692.2	3.22964e-05	692.2	6.33733e-05	692.2	3.27057e-05	692.2	9.25986e-05	692.2	2.85733e-05	692.2	2.97561e-05	692.2		692.2	2.48011e-05	692.2	1.76168e-05	692.2	8.52008e-05	692.2	3.16433e-05	692.2	6.85049e-05
692.4	3.75659e-05	692.4	0.000105673	692.4	8.55726e-05	692.4	2.41751e-05	692.4	6.33733e-05	692.4	3.59302e-05	692.4	0.00010371	692.4	2.85733e-05	692.4	2.55902e-05	692.4		692.4	2.48011e-05	692.4	1.60439e-05	692.4	9.96338e-05	692.4	3.16433e-05	692.4	5.42476e-05
692.6	3.33919e-05	692.6	0.000105673	692.6	0.000143802	692.6	1.68092e-05	692.6	6.33733e-05	692.6	3.59302e-05	692.6	0.000130564	692.6	2.85733e-05	692.6	1.75561e-05	692.6		692.6	2.37134e-05	692.6	1.76168e-05	692.6	0.000105686	692.6	2.84086e-05	692.6	5.42476e-05
692.8	3.33919e-05	692.8	0.000105673	692.8	6.02553e-05	692.8	9.4434e-06	692.8	8.8549e-05	692.8	3.59302e-05	692.8	0.000146306	692.8	3.15586e-05	692.8	1.30927e-05	692.8		692.8	2.37134e-05	692.8	1.76168e-05	692.8	0.000110808	692.8	2.84086e-05	692.8	5.42476e-05
693	3.75659e-05	693	6.8948e-05	693	3.44316e-05	693	9.25453e-06	693	0.000109384	693	2.60263e-05	693	0.000147232	693	3.68894e-05	693	6.8439e-06	693		693	1.93623e-05	693	1.46807e-05	693	0.000114998	693	2.74242e-05	693	5.25089e-05
693.2	3.75659e-05	693.2	6.8948e-05	693.2	6.73441e-05	693.2	9.25453e-06	693.2	0.000109384	693.2	3.13237e-05	693.2	0.000147232	693.2	3.98747e-05	693.2	6.8439e-06	693.2		693.2	1.89272e-05	693.2	1.41564e-05	693.2	0.00011686	693.2	2.74242e-05	693.2	3.72083e-05
693.4	3.75659e-05	693.4	6.5474e-05	693.4	0.000136207	693.4	9.25453e-06	693.4	0.000109384	693.4	2.71779e-05	693.4	0.000147232	693.4	3.98747e-05	693.4	6.8439e-06	693.4		693.4	1.89272e-05	693.4	1.37369e-05	693.4	0.000120585	693.4	2.74242e-05	693.4	3.58173e-05
693.6	3.33919e-05	693.6	6.39852e-05	693.6	8.05091e-05	693.6	9.4434e-06	693.6	0.000113725	693.6	2.71779e-05	693.6	0.000146306	693.6	4.26467e-05	693.6	6.8439e-06	693.6		693.6	1.89272e-05	693.6	1.41564e-05	693.6	0.000120585	693.6	2.65803e-05	693.6	1.53006e-05
693.8	3.13049e-05	693.8	6.39852e-05	693.8	9.31678e-05	693.8	1.13321e-05	693.8	0.000113725	693.8	2.71779e-05	693.8	0.000116674	693.8	4.26467e-05	693.8	1.10097e-05	693.8		693.8	1.32708e-05	693.8	1.41564e-05	693.8	0.00013688	693.8	2.55959e-05	693.8	1.53006e-05
694	3.13049e-05	694	6.39852e-05	694	4.25331e-05	694	1.22764e-05	694	0.000113725	694	3.13237e-05	694	0.000116674	694	4.26467e-05	694	1.33902e-05	694		694	1.26181e-05	694	1.37369e-05	694	0.000134087	694	2.55959e-05	694	1.53006e-05
694.2	3.13049e-05	694.2	6.39852e-05	694.2	8.6079e-05	694.2	1.22764e-05	694.2	0.000113725	694.2	3.24753e-05	694.2	0.000116674	694.2	4.26467e-05	694.2	2.20195e-05	694.2		694.2	2.17554e-07	694.2	1.23737e-05	694.2	0.000134087	694.2	1.37824e-05	694.2	2.29509e-05
694.4	3.13049e-05	694.4	6.39852e-05	694.4	0.00014836	694.4	1.2843e-05	694.4	0.000103307	694.4	5.71197e-05	694.4	0.000105562	694.4	4.26467e-05	694.4	2.23171e-05	694.4		694.4	2.17554e-07	694.4	8.17924e-06	694.4	0.000137811	694.4	3.51592e-06	694.4	2.29509e-05
694.6	4.71661e-05	694.6	6.39852e-05	694.6	0.000107852	694.6	1.2843e-05	694.6	0.000105043	694.6	5.71197e-05	694.6	0.000102784	694.6	4.34996e-05	694.6	2.23171e-05	694.6		694.6	2.17554e-07	694.6	1.36321e-05	694.6	0.000143864	694.6	1.547e-06	694.6	2.71238e-05
694.8	4.71661e-05	694.8	7.09331e-05	694.8	0.000120511	694.8	1.22764e-05	694.8	7.81314e-05	694.8	5.71197e-05	694.8	7.59308e-05	694.8	4.34996e-05	694.8	2.52927e-05	694.8		694.8	2.17554e-07	694.8	8.17924e-06	694.8	0.000147588	694.8	0	694.8	2.71238e-05
695	4.71661e-05	695	7.09331e-05	695	0.000124055	695	1.17098e-05	695	7.81314e-05	695	5.71197e-05	695	7.59308e-05	695	4.34996e-05	695	2.52927e-05	695		695	5.6564e-06	695	8.17924e-06	695	0.000147588	695	0	695	4.06857e-05
695.2	4.71661e-05	695.2	6.99405e-05	695.2	0.000105826	695.2	1.17098e-05	695.2	2.25713e-05	695.2	4.92888e-05	695.2	7.68568e-05	695.2	4.8404e-05	695.2	2.52927e-05	695.2		695.2	6.52661e-06	695.2	7.13062e-06	695.2	0.000143864	695.2	0	695.2	5.45953e-05
695.4	4.88356e-05	695.4	7.09331e-05	695.4	6.4306e-05	695.4	1.17098e-05	695.4	1.56263e-05	695.4	2.99418e-05	695.4	7.68568e-05	695.4	4.8404e-05	695.4	2.94585e-05	695.4		695.4	1.84921e-05	695.4	7.13062e-06	695.4	0.000143864	695.4	3.51592e-06	695.4	5.45953e-05
695.6	4.9253e-05	695.6	7.09331e-05	695.6	8.05091e-05	695.6	1.26542e-05	695.6	1.12857e-05	695.6	2.5796e-05	695.6	7.59308e-05	695.6	4.8404e-05	695.6	2.94585e-05	695.6		695.6	1.89272e-05	695.6	9.33272e-06	695.6	0.000113601	695.6	1.04071e-05	695.6	5.45953e-05
695.8	4.21573e-05	695.8	8.08586e-05	695.8	0.000114434	695.8	1.26542e-05	695.8	1.04175e-05	695.8	2.41838e-05	695.8	7.59308e-05	695.8	4.8404e-05	695.8	2.94585e-05	695.8		695.8	1.89272e-05	695.8	1.36321e-05	695.8	0.000103358	695.8	1.7439e-05	695.8	5.45953e-05
696	3.67311e-05	696	9.97172e-05	696	3.59506e-05	696	1.30319e-05	696	7.81314e-06	696	1.58922e-05	696	7.68568e-05	696	4.54188e-05	696	3.03512e-05	696		696	1.89272e-05	696	1.25834e-05	696	6.05252e-05	696	1.81421e-05	696	5.45953e-05
696.2	3.67311e-05	696.2	9.97172e-05	696.2	8.65853e-05	696.2	1.34096e-05	696.2	1.04175e-05	696.2	1.58922e-05	696.2	7.68568e-05	696.2	4.07276e-05	696.2	3.54097e-05	696.2		696.2	1.89272e-05	696.2	1.70925e-05	696.2	6.00596e-05	696.2	1.81421e-05	696.2	5.59863e-05
696.4	4.38269e-05	696.4	9.97172e-05	696.4	0.000109877	696.4	2.30419e-05	696.4	1.04175e-05	696.4	1.42799e-05	696.4	9.07466e-05	696.4	3.32644e-05	696.4	3.03512e-05	696.4		696.4	2.15378e-05	696.4	1.80363e-05	696.4	6.00596e-05	696.4	1.81421e-05	696.4	5.6334e-05
696.6	4.38269e-05	696.6	9.97172e-05	696.6	0.000111396	696.6	2.30419e-05	696.6	1.04175e-05	696.6	1.38193e-05	696.6	6.01891e-05	696.6	2.66542e-05	696.6	2.94585e-05	696.6		696.6	1.8057e-05	696.6	1.91898e-05	696.6	6.00596e-05	696.6	1.82828e-05	696.6	5.66818e-05
696.8	4.17399e-05	696.8	9.97172e-05	696.8	6.83568e-05	696.8	2.30419e-05	696.8	3.29888e-05	696.8	1.3589e-05	696.8	5.27812e-05	696.8	2.45219e-05	696.8	2.32097e-05	696.8		696.8	1.8057e-05	696.8	2.09724e-05	696.8	6.05252e-05	696.8	1.82828e-05	696.8	5.66818e-05
697	3.84007e-05	697	9.97172e-05	697	0.000104814	697	1.85091e-05	697	9.89665e-05	697	1.3589e-05	697	5.27812e-05	697	1.51396e-05	697	2.32097e-05	697		697	1.8057e-05	697	2.09724e-05	697	6.93712e-05	697	2.17987e-05	697	5.91159e-05
697.2	4.17399e-05	697.2	0.000109146	697.2	8.81043e-05	697.2	1.85091e-05	697.2	0.000123274	697.2	1.12858e-05	697.2	6.01891e-05	697.2	1.21543e-05	697.2	2.32097e-05	697.2		697.2	2.11027e-05	697.2	2.3594e-05	697.2	6.93712e-05	697.2	2.17987e-05	697.2	5.91159e-05
697.4	4.38269e-05	697.4	0.000109643	697.4	3.59506e-05	697.4	1.81313e-05	697.4	0.000179702	697.4	3.68514e-06	697.4	6.01891e-05	697.4	1.15146e-05	697.4	2.32097e-05	697.4		697.4	2.37134e-05	697.4	2.3594e-05	697.4	7.82172e-05	697.4	3.10807e-05	697.4	6.32888e-05
697.6	5.30096e-05	697.6	0.000109643	697.6	0.000156461	697.6	1.85091e-05	697.6	0.000179702	697.6	3.2245e-06	697.6	6.01891e-05	697.6	4.26467e-06	697.6	2.32097e-05	697.6		697.6	2.37134e-05	697.6	2.3594e-05	697.6	9.12534e-05	697.6	3.10807e-05	697.6	5.91159e-05
697.8	5.92706e-05	697.8	0.000109643	697.8	7.5952e-05	697.8	1.85091e-05	697.8	0.000179702	697.8	3.2245e-06	697.8	5.55592e-05	697.8	0	697.8	4.13609e-05	697.8		697.8	2.11027e-05	697.8	2.3594e-05	697.8	7.82172e-05	697.8	3.10807e-05	697.8	5.91159e-05
698	5.9688e-05	698	0.000109146	698	0.000113422	698	2.19087e-05	698	0.000179702	698	3.2245e-06	698	5.55592e-05	698	0	698	4.93951e-05	698		698	2.11027e-05	698	2.02384e-05	698	6.93712e-05	698	3.10807e-05	698	5.66818e-05
698.2	5.9688e-05	698.2	0.000109643	698.2	0.000137726	698.2	2.4364e-05	698.2	9.63621e-05	698.2	3.2245e-06	698.2	6.7597e-05	698.2	0	698.2	4.93951e-05	698.2		698.2	1.43585e-05	698.2	1.92946e-05	698.2	6.844e-05	698.2	1.3923e-05	698.2	4.97269e-05
698.4	5.9688e-05	698.4	0.000109643	698.4	0.000163044	698.4	2.49306e-05	698.4	7.29227e-05	698.4	2.85599e-05	698.4	7.77828e-05	698.4	4.26467e-06	698.4	4.93951e-05	698.4		698.4	1.43585e-05	698.4	1.71974e-05	698.4	6.65777e-05	698.4	1.32199e-05	698.4	4.97269e-05
698.6	5.92706e-05	698.6	0.000123539	698.6	0.000100763	698.6	2.49306e-05	698.6	7.29227e-05	698.6	3.68514e-05	698.6	0.000101858	698.6	4.90437e-06	698.6	4.34439e-05	698.6		698.6	1.43585e-05	698.6	1.05911e-05	698.6	4.09709e-05	698.6	1.19541e-05	698.6	4.97269e-05
698.8	4.50791e-05	698.8	0.000100213	698.8	8.96234e-05	698.8	2.49306e-05	698.8	6.25052e-05	698.8	3.98456e-05	698.8	0.000168529	698.8	1.23675e-05	698.8	4.13609e-05	698.8		698.8	1.43585e-05	698.8	1.05911e-05	698.8	3.63151e-05	698.8	1.19541e-05	698.8	4.97269e-05
699	3.17223e-05	699	9.77321e-05	699	0.000136207	699	2.4364e-05	699	6.25052e-05	699	4.12275e-05	699	0.000168529	699	2.43086e-05	699	2.73756e-05	699		699	1.76219e-05	699	1.05911e-05	699	2.56068e-05	699	7.73502e-06	699	5.18134e-05
699.2	3.04701e-05	699.2	9.77321e-05	699.2	0.000125574	699.2	8.49906e-06	699.2	7.29227e-05	699.2	4.16882e-05	699.2	0.000168529	699.2	2.43086e-05	699.2	8.62926e-06	699.2		699.2	1.87096e-05	699.2	1.03813e-05	699.2	2.56068e-05	699.2	7.73502e-06	699.2	5.52908e-05
699.4	3.04701e-05	699.4	9.12805e-05	699.4	7.19012e-05	699.4	7.36585e-06	699.4	8.33402e-05	699.4	4.16882e-05	699.4	0.000168529	699.4	2.43086e-05	699.4	8.62926e-06	699.4		699.4	1.95798e-05	699.4	8.80841e-06	699.4	2.56068e-05	699.4	4.07847e-06	699.4	5.94637e-05
	--		--		5.06347e-05		--		--		--		--		--		--				--		--		--		--		--
			0		6.98759e-05
			4.44781e-08		0.000159499
			--		--
			--		--
			--		--
			--		--
			--		--
			--		--
			--		--
			--		--
			--		--
			--		--
			--		--
			--		--
			--		--
			--		--
			--		--
			--		--
			--		--
			--		--
			--		--
			--		--
			--		--
			--		--
			--		--
			--		--
			--		--
			--		--
			--		--
			--		--
			--		--
			--		--
			--		--
			--		--
			--		--
			--		--
			--		--
			--		--
			--		--
			--		--
			--		--
			--		--
			--		--
			--		--
			--		--
			--		--
			--		--
			--		--
			--		--
			--		--
			--		--
			--		--
			--		--
			--		--
			--		--
			--		--
			--		--
			--		--
			--		--
			--		--
			--		--
			--		--
			--		--
			--		--
			--		--
			--		--
			--		--
			--		--
			--		--
			--		--
			--		--
			--		--
			--		--
			--		--
			--		--
			--		--
			--		--
			--		--
			--		--
			--		--
			--		--
			--		--
			--		--
			--		--
			--		--
			--		--
			--		--
			--		--
			--		--
			--		--
			--		--
			--		--
			--		--
			--		--
			--		--
			--		--
			--		--
			--		--
			--		--
			--		--
			--		--
			--		--
			--		--
