# Supplementary material for: High-performance deep-blue phosphorescent organic light-emitting diodes enabled by a platinum(II) emitter
Source: Research Square preprint supplement (doi:10.21203/rs.3.rs-5009247/v1), 2024-09-09
Supplement: Supplementary file 16 [file Supplimentary Fig. 9.xlsx]

## Sheet: Sheet1
Electrochemical properties of PtQS1
CV		DPV
-1.0591	-1.26	0.9618	-1.625	--	--
-1.0601	-1.26	0.9318	-1.181	--	--
-1.0611	-1.266	0.9018	-0.9743	--	--
-1.0621	-1.266	0.8718	-0.8965	--	--
-1.0631	-1.263	0.8418	-0.7808	-2.9037	3.016
-1.0641	-1.263	0.8118	-0.75	-2.8737	3.115
-1.0651	-1.263	0.7818	-0.7415	-2.8437	4.098
-1.0661	-1.263	0.7518	-0.739	-2.8137	6.362
-1.0671	-1.275	0.7218	-0.7743	-2.7837	10.09
-1.0681	-1.278	0.6918	-0.8461	-2.7537	13.78
-1.0691	-1.269	0.6618	-1.045	-2.7237	14.22
-1.0701	-1.272	0.6318	-1.452	-2.6937	10.64
-1.0711	-1.275	0.6018	-2.122	-2.6637	5.95
-1.0721	-1.275	0.5718	-2.431	-2.6337	2.804
-1.0731	-1.281	0.5418	-1.821	-2.6037	1.329
-1.0741	-1.281	0.5118	-1.071	-2.5737	0.7553
-1.0751	-1.278	0.4818	-0.8704	-2.5437	0.5558
-1.0761	-1.278	0.4518	-0.7765	-2.5137	0.4945
-1.0771	-1.281	0.4218	-0.7418	-2.4837	0.4741
-1.0781	-1.281	0.3918	-0.7235	-2.4537	0.4663
-1.0791	-1.29	0.3618	-0.6901	-2.4237	0.4624
-1.0801	-1.29	0.3318	-0.6761	-2.3937	0.4619
-1.0811	-1.284	0.3018	-0.6573	-2.3637	0.4582
-1.0821	-1.287	0.2718	-0.6474	-2.3337	0.4588
-1.0831	-1.284	0.2418	-0.6479	-2.3037	0.4614
-1.0841	-1.294	0.2118	-0.6568	-2.2737	0.4632
-1.0851	-1.3	0.1818	-0.693	-2.2437	0.4672
-1.0861	-1.297	0.1518	-0.8285	-2.2137	0.4713
-1.0871	-1.29	0.1218	-1.243	-2.1837	0.4791
-1.0881	-1.294	0.0918	-2.322	-2.1537	0.4832
-1.0891	-1.3	0.0618	-5.125	-2.1237	0.4866
-1.0901	-1.297	0.0318	-10.17	-2.0937	0.491
-1.0911	-1.306	0.0018	-14.38	-2.0637	0.494
-1.0921	-1.303	-0.0282	-12.58	-2.0337	0.4947
-1.0931	-1.3	-0.0582	-6.945	-2.0037	0.4978
-1.0941	-1.303	-0.0882	-3.012	-1.9737	0.4997
-1.0951	-1.3	-0.1182	-1.354	-1.9437	0.5012
-1.0961	-1.306	-0.1482	-0.7835	-1.9137	0.5042
-1.0971	-1.312	-0.1782	-0.5965	-1.8837	0.5074
-1.0981	-1.309	-0.2082	-0.54	-1.8537	0.5071
-1.0991	-1.306	-0.2382	-0.5272	-1.8237	0.5057
-1.1001	-1.309	-0.2682	-0.5239	-1.7937	0.5101
-1.1011	-1.309	-0.2982	-0.5307	-1.7637	0.5129
-1.1021	-1.315	-0.3282	-0.5403	-1.7337	0.5126
-1.1031	-1.318	-0.3582	-0.5529	-1.7037	0.5155
-1.1041	-1.315	-0.3882	-0.5669	-1.6737	0.517
-1.1051	-1.318	-0.4182	-0.5846	-1.6437	0.5172
-1.1061	-1.309	-0.4482	-0.6013	-1.6137	0.5211
-1.1071	-1.321	-0.4782	-0.6213	-1.5837	0.5242
-1.1081	-1.324	-0.5082	-0.6425	-1.5537	0.5275
-1.1091	-1.327	-0.5382	-0.6622	-1.5237	0.5314
-1.1101	-1.324	-0.5682	-0.6837	-1.4937	0.5353
-1.1111	-1.318	-0.5982	-0.7006	-1.4637	0.5386
-1.1121	-1.318	-0.6282	-0.7162	-1.4337	0.5444
-1.1131	-1.33	-0.6582	-0.7276	-1.4037	0.5506
-1.1141	-1.327	-0.6882	-0.7333	-1.3737	0.5568
-1.1151	-1.33	-0.7182	-0.737	-1.3437	0.5627
-1.1161	-1.334	-0.7482	-0.7339	-1.3137	0.5669
-1.1171	-1.327	-0.7782	-0.738	-1.2837	0.571
-1.1181	-1.33	-0.8082	-0.7356	-1.2537	0.573
-1.1191	-1.334	-0.8382	-0.7309	-1.2237	0.5735
-1.1201	-1.33	-0.8682	-0.7296	-1.1937	0.5727
-1.1211	-1.337	-0.8982	-0.7272	-1.1637	0.5763
-1.1221	-1.34	-0.9282	-0.7232	-1.1337	0.5802
-1.1231	-1.33	-0.9582	-0.7164	-1.1037	0.586
-1.1241	-1.34	-0.9882	-0.7111	-1.0737	0.5925
-1.1251	-1.334	-1.0182	-0.7065	-1.0437	0.6042
-1.1261	-1.343	-1.0482	-0.7014	-1.0137	0.6146
-1.1271	-1.346	-1.0782	-0.6997	-0.9837	0.6272
-1.1281	-1.343	-1.1082	-0.6989	-0.9537	0.6404
-1.1291	-1.343	-1.1382	-0.7007	-0.9237	0.658
-1.1301	-1.34	-1.1682	-0.7067	-0.8937	0.6733
-1.1311	-1.343	-1.1982	-0.7173	-0.8637	0.6902
-1.1321	-1.346	-1.2282	-0.7289	-0.8337	0.7028
-1.1331	-1.352	-1.2582	-0.7345	-0.8037	0.7141
-1.1341	-1.352	-1.2882	-0.7272	-0.7737	0.7251
-1.1351	-1.352	-1.3182	-0.7151	-0.7437	0.735
-1.1361	-1.349	-1.3482	-0.7015	-0.7137	0.7441
-1.1371	-1.343	-1.3782	-0.6893	-0.6837	0.755
-1.1381	-1.358	-1.4082	-0.6824	-0.6537	0.7651
-1.1391	-1.358	-1.4382	-0.677	-0.6237	0.7765
-1.1401	-1.358	-1.4682	-0.6728	-0.5937	0.7876
-1.1411	-1.352	-1.4982	-0.6694	-0.5637	0.7969
-1.1421	-1.352	-1.5282	-0.6689	-0.5337	0.803
-1.1431	-1.361	-1.5582	-0.6677	-0.5037	0.8066
-1.1441	-1.355	-1.5882	-0.6695	-0.4737	0.8056
-1.1451	-1.364	-1.6182	-0.6712	-0.4437	0.8012
-1.1461	-1.361	-1.6482	-0.6719	-0.4137	0.791
-1.1471	-1.355	-1.6782	-0.6751	-0.3837	0.7809
-1.1481	-1.361	-1.7082	-0.6782	-0.3537	0.77
-1.1491	-1.364	-1.7382	-0.6795	-0.3237	0.7639
-1.1501	-1.361	-1.7682	-0.6826	-0.2937	0.7726
-1.1511	-1.377	-1.7982	-0.6868	-0.2637	0.8032
-1.1521	-1.37	-1.8282	-0.6896	-0.2337	0.8604
-1.1531	-1.367	-1.8582	-0.6922	-0.2037	0.9611
-1.1541	-1.367	-1.8882	-0.6966	-0.1737	1.141
-1.1551	-1.367	-1.9182	-0.6993	-0.1437	1.51
-1.1561	-1.374	-1.9482	-0.6993	-0.1137	2.394
-1.1571	-1.374	-1.9782	-0.6995	-0.0837	4.558
-1.1581	-1.374	-2.0082	-0.6992	-0.0537	8.886
-1.1591	-1.374	-2.0382	-0.7026	-0.0237	13.89
-1.1601	-1.37	-2.0682	-0.7052	0.0063	14.38
-1.1611	-1.374	-2.0982	-0.7043	0.0363	9.416
-1.1621	-1.38	-2.1282	-0.7029	0.0663	4.656
-1.1631	-1.38	-2.1582	-0.7016	0.0963	2.364
-1.1641	-1.374	-2.1882	-0.7075	0.1263	1.585
-1.1651	-1.38	-2.2182	-0.7098	0.1563	1.317
-1.1661	-1.38	-2.2482	-0.7177	0.1863	1.227
-1.1671	-1.38	-2.2782	-0.7341	0.2163	1.204
-1.1681	-1.383	-2.3082	-0.7513	0.2463	1.262
-1.1691	-1.386	-2.3382	-0.7699	0.2763	1.277
-1.1701	-1.392	-2.3682	-0.7914	0.3063	1.293
-1.1711	-1.38	-2.3982	-0.8165	0.3363	1.347
-1.1721	-1.383	-2.4282	-0.844	0.3663	1.402
-1.1731	-1.383	-2.4582	-0.8672	0.3963	1.433
-1.1741	-1.392	-2.4882	-0.8996	0.4263	1.496
-1.1751	-1.392	-2.5182	-0.955	0.4563	1.658
-1.1761	-1.395	-2.5482	-1.069	0.4863	1.904
-1.1771	-1.389	-2.5782	-1.338	0.5163	2.873
-1.1781	-1.389	-2.6082	-2.045	0.5463	5.191
-1.1791	-1.395	-2.6382	-3.852	0.5763	5.196
-1.1801	-1.395	-2.6682	-7.814	0.6063	3.285
-1.1811	-1.401	-2.6982	-14.16	0.6363	2.242
-1.1821	-1.398	-2.7282	-19.19	0.6663	1.912
-1.1831	-1.395	-2.7582	-19.26	0.6963	1.872
-1.1841	-1.392	-2.7882	-14.67	0.7263	1.92
-1.1851	-1.398	-2.8182	-9.438	0.7563	2.054
-1.1861	-1.398	-2.8482	-6.203	0.7863	2.143
-1.1871	-1.401	-2.8782	-4.99	0.8163	2.277
-1.1881	-1.404	-2.9082	-4.994	0.8463	2.474
-1.1891	-1.401	--	--	0.8763	2.692
-1.1901	-1.401	--	--	0.9063	2.941
-1.1911	-1.407	--	--	0.9363	3.273
-1.1921	-1.404	--	--	0.9663	3.772
-1.1931	-1.407	--	--	0.9963	4.387
-1.1941	-1.411	--	--	--	--
-1.1951	-1.404	--	--	--	--
-1.1961	-1.407	--	--	--	--
-1.1971	-1.407	--	--	--	--
-1.1981	-1.411	--	--	--	--
-1.1991	-1.417	--	--	--	--
-1.2001	-1.414	--	--	--	--
-1.2011	-1.411	--	--	--	--
-1.2021	-1.407	--	--	--	--
-1.2031	-1.417	--	--	--	--
-1.2041	-1.42	--	--	--	--
-1.2051	-1.426	--	--	--	--
-1.2061	-1.42	--	--	--	--
-1.2071	-1.417	--	--	--	--
-1.2081	-1.417	--	--	--	--
-1.2091	-1.426	--	--	--	--
-1.2101	-1.426	--	--	--	--
-1.2111	-1.426	--	--	--	--
-1.2121	-1.429	--	--	--	--
-1.2131	-1.423	--	--	--	--
-1.2141	-1.426	--	--	--	--
-1.2151	-1.426	--	--	--	--
-1.2161	-1.432	--	--	--	--
-1.2171	-1.432	--	--	--	--
-1.2181	-1.432	--	--	--	--
-1.2191	-1.426	--	--	--	--
-1.2201	-1.432	--	--	--	--
-1.2211	-1.432	--	--	--	--
-1.2221	-1.432	--	--	--	--
-1.2231	-1.441	--	--	--	--
-1.2241	-1.432	--	--	--	--
-1.2251	-1.435	--	--	--	--
-1.2261	-1.432	--	--	--	--
-1.2271	-1.438	--	--	--	--
-1.2281	-1.444	--	--	--	--
-1.2291	-1.444	--	--	--	--
-1.2301	-1.441	--	--	--	--
-1.2311	-1.438	--	--	--	--
-1.2321	-1.441	--	--	--	--
-1.2331	-1.441	--	--	--	--
-1.2341	-1.447	--	--	--	--
-1.2351	-1.447	--	--	--	--
-1.2361	-1.447	--	--	--	--
-1.2371	-1.447	--	--	--	--
-1.2381	-1.444	--	--	--	--
-1.2391	-1.454	--	--	--	--
-1.2401	-1.447	--	--	--	--
-1.2411	-1.46	--	--	--	--
-1.2421	-1.451	--	--	--	--
-1.2431	-1.454	--	--	--	--
-1.2441	-1.454	--	--	--	--
-1.2451	-1.454	--	--	--	--
-1.2461	-1.454	--	--	--	--
-1.2471	-1.466	--	--	--	--
-1.2481	-1.457	--	--	--	--
-1.2491	-1.454	--	--	--	--
-1.2501	-1.457	--	--	--	--
-1.2511	-1.457	--	--	--	--
-1.2521	-1.469	--	--	--	--
-1.2531	-1.466	--	--	--	--
-1.2541	-1.463	--	--	--	--
-1.2551	-1.466	--	--	--	--
-1.2561	-1.457	--	--	--	--
-1.2571	-1.469	--	--	--	--
-1.2581	-1.469	--	--	--	--
-1.2591	-1.472	--	--	--	--
-1.2601	-1.472	--	--	--	--
-1.2611	-1.466	--	--	--	--
-1.2621	-1.466	--	--	--	--
-1.2631	-1.472	--	--	--	--
-1.2641	-1.472	--	--	--	--
-1.2651	-1.481	--	--	--	--
-1.2661	-1.478	--	--	--	--
-1.2671	-1.472	--	--	--	--
-1.2681	-1.475	--	--	--	--
-1.2691	-1.478	--	--	--	--
-1.2701	-1.475	--	--	--	--
-1.2711	-1.491	--	--	--	--
-1.2721	-1.481	--	--	--	--
-1.2731	-1.475	--	--	--	--
-1.2741	-1.475	--	--	--	--
-1.2751	-1.478	--	--	--	--
-1.2761	-1.487	--	--	--	--
-1.2771	-1.491	--	--	--	--
-1.2781	-1.484	--	--	--	--
-1.2791	-1.484	--	--	--	--
-1.2801	-1.484	--	--	--	--
-1.2811	-1.484	--	--	--	--
-1.2821	-1.491	--	--	--	--
-1.2831	-1.497	--	--	--	--
-1.2841	-1.494	--	--	--	--
-1.2851	-1.494	--	--	--	--
-1.2861	-1.491	--	--	--	--
-1.2871	-1.491	--	--	--	--
-1.2881	-1.494	--	--	--	--
-1.2891	-1.503	--	--	--	--
-1.2901	-1.5	--	--	--	--
-1.2911	-1.491	--	--	--	--
-1.2921	-1.497	--	--	--	--
-1.2931	-1.497	--	--	--	--
-1.2941	-1.503	--	--	--	--
-1.2951	-1.506	--	--	--	--
-1.2961	-1.503	--	--	--	--
-1.2971	-1.5	--	--	--	--
-1.2981	-1.5	--	--	--	--
-1.2991	-1.5	--	--	--	--
-1.3001	-1.503	--	--	--	--
-1.3011	-1.512	--	--	--	--
-1.3021	-1.512	--	--	--	--
-1.3031	-1.509	--	--	--	--
-1.3041	-1.503	--	--	--	--
-1.3051	-1.512	--	--	--	--
-1.3061	-1.509	--	--	--	--
-1.3071	-1.515	--	--	--	--
-1.3081	-1.515	--	--	--	--
-1.3091	-1.512	--	--	--	--
-1.3101	-1.509	--	--	--	--
-1.3111	-1.515	--	--	--	--
-1.3121	-1.534	--	--	--	--
-1.3131	-1.527	--	--	--	--
-1.3141	-1.521	--	--	--	--
-1.3151	-1.521	--	--	--	--
-1.3161	-1.518	--	--	--	--
-1.3171	-1.515	--	--	--	--
-1.3181	-1.524	--	--	--	--
-1.3191	-1.531	--	--	--	--
-1.3201	-1.521	--	--	--	--
-1.3211	-1.524	--	--	--	--
-1.3221	-1.521	--	--	--	--
-1.3231	-1.524	--	--	--	--
-1.3241	-1.531	--	--	--	--
-1.3251	-1.527	--	--	--	--
-1.3261	-1.531	--	--	--	--
-1.3271	-1.531	--	--	--	--
-1.3281	-1.521	--	--	--	--
-1.3291	-1.531	--	--	--	--
-1.3301	-1.531	--	--	--	--
-1.3311	-1.54	--	--	--	--
-1.3321	-1.534	--	--	--	--
-1.3331	-1.534	--	--	--	--
-1.3341	-1.534	--	--	--	--
-1.3351	-1.537	--	--	--	--
-1.3361	-1.537	--	--	--	--
-1.3371	-1.54	--	--	--	--
-1.3381	-1.543	--	--	--	--
-1.3391	-1.534	--	--	--	--
-1.3401	-1.537	--	--	--	--
-1.3411	-1.54	--	--	--	--
-1.3421	-1.54	--	--	--	--
-1.3431	-1.546	--	--	--	--
-1.3441	-1.546	--	--	--	--
-1.3451	-1.54	--	--	--	--
-1.3461	-1.543	--	--	--	--
-1.3471	-1.54	--	--	--	--
-1.3481	-1.549	--	--	--	--
-1.3491	-1.552	--	--	--	--
-1.3501	-1.546	--	--	--	--
-1.3511	-1.546	--	--	--	--
-1.3521	-1.546	--	--	--	--
-1.3531	-1.546	--	--	--	--
-1.3541	-1.552	--	--	--	--
-1.3551	-1.555	--	--	--	--
-1.3561	-1.555	--	--	--	--
-1.3571	-1.552	--	--	--	--
-1.3581	-1.549	--	--	--	--
-1.3591	-1.552	--	--	--	--
-1.3601	-1.555	--	--	--	--
-1.3611	-1.561	--	--	--	--
-1.3621	-1.558	--	--	--	--
-1.3631	-1.552	--	--	--	--
-1.3641	-1.552	--	--	--	--
-1.3651	-1.558	--	--	--	--
-1.3661	-1.558	--	--	--	--
-1.3671	-1.571	--	--	--	--
-1.3681	-1.561	--	--	--	--
-1.3691	-1.564	--	--	--	--
-1.3701	-1.558	--	--	--	--
-1.3711	-1.561	--	--	--	--
-1.3721	-1.564	--	--	--	--
-1.3731	-1.571	--	--	--	--
-1.3741	-1.571	--	--	--	--
-1.3751	-1.564	--	--	--	--
-1.3761	-1.558	--	--	--	--
-1.3771	-1.564	--	--	--	--
-1.3781	-1.571	--	--	--	--
-1.3791	-1.574	--	--	--	--
-1.3801	-1.571	--	--	--	--
-1.3811	-1.571	--	--	--	--
-1.3821	-1.574	--	--	--	--
-1.3831	-1.567	--	--	--	--
-1.3841	-1.577	--	--	--	--
-1.3851	-1.58	--	--	--	--
-1.3861	-1.571	--	--	--	--
-1.3871	-1.577	--	--	--	--
-1.3881	-1.58	--	--	--	--
-1.3891	-1.574	--	--	--	--
-1.3901	-1.577	--	--	--	--
-1.3911	-1.58	--	--	--	--
-1.3921	-1.583	--	--	--	--
-1.3931	-1.583			--	--
-1.3941	-1.58			--	--
-1.3951	-1.58			--	--
-1.3961	-1.583			--	--
-1.3971	-1.589			--	--
-1.3981	-1.589			--	--
-1.3991	-1.583			--	--
-1.4001	-1.583			--	--
-1.4011	-1.586			--	--
-1.4021	-1.583			--	--
-1.4031	-1.592			--	--
-1.4041	-1.592			--	--
-1.4051	-1.589			--	--
-1.4061	-1.589			--	--
-1.4071	-1.589			--	--
-1.4081	-1.586			--	--
-1.4091	-1.604			--	--
-1.4101	-1.595			--	--
-1.4111	-1.595			--	--
-1.4121	-1.592			--	--
-1.4131	-1.595			--	--
-1.4141	-1.601
-1.4151	-1.604
-1.4161	-1.598
-1.4171	-1.604
-1.4181	-1.598
-1.4191	-1.598
-1.4201	-1.598
-1.4211	-1.614
-1.4221	-1.604
-1.4231	-1.608
-1.4241	-1.601
-1.4251	-1.608
-1.4261	-1.604
-1.4271	-1.608
-1.4281	-1.617
-1.4291	-1.611
-1.4301	-1.608
-1.4311	-1.614
-1.4321	-1.608
-1.4331	-1.62
-1.4341	-1.62
-1.4351	-1.611
-1.4361	-1.614
-1.4371	-1.614
-1.4381	-1.617
-1.4391	-1.623
-1.4401	-1.62
-1.4411	-1.617
-1.4421	-1.62
-1.4431	-1.62
-1.4441	-1.62
-1.4451	-1.629
-1.4461	-1.626
-1.4471	-1.626
-1.4481	-1.62
-1.4491	-1.626
-1.4501	-1.632
-1.4511	-1.629
-1.4521	-1.632
-1.4531	-1.629
-1.4541	-1.626
-1.4551	-1.632
-1.4561	-1.629
-1.4571	-1.641
-1.4581	-1.638
-1.4591	-1.635
-1.4601	-1.632
-1.4611	-1.638
-1.4621	-1.635
-1.4631	-1.648
-1.4641	-1.638
-1.4651	-1.638
-1.4661	-1.641
-1.4671	-1.638
-1.4681	-1.641
-1.4691	-1.648
-1.4701	-1.644
-1.4711	-1.648
-1.4721	-1.641
-1.4731	-1.648
-1.4741	-1.644
-1.4751	-1.657
-1.4761	-1.654
-1.4771	-1.648
-1.4781	-1.641
-1.4791	-1.651
-1.4801	-1.657
-1.4811	-1.663
-1.4821	-1.657
-1.4831	-1.654
-1.4841	-1.657
-1.4851	-1.654
-1.4861	-1.66
-1.4871	-1.666
-1.4881	-1.657
-1.4891	-1.657
-1.4901	-1.663
-1.4911	-1.663
-1.4921	-1.663
-1.4931	-1.669
-1.4941	-1.666
-1.4951	-1.666
-1.4961	-1.66
-1.4971	-1.672
-1.4981	-1.666
-1.4991	-1.675
-1.5001	-1.672
-1.5011	-1.672
-1.5021	-1.669
-1.5031	-1.672
-1.5041	-1.669
-1.5051	-1.681
-1.5061	-1.678
-1.5071	-1.675
-1.5081	-1.675
-1.5091	-1.681
-1.5101	-1.681
-1.5111	-1.688
-1.5121	-1.681
-1.5131	-1.681
-1.5141	-1.681
-1.5151	-1.681
-1.5161	-1.688
-1.5171	-1.694
-1.5181	-1.688
-1.5191	-1.691
-1.5201	-1.684
-1.5211	-1.694
-1.5221	-1.694
-1.5231	-1.697
-1.5241	-1.697
-1.5251	-1.694
-1.5261	-1.697
-1.5271	-1.694
-1.5281	-1.694
-1.5291	-1.706
-1.5301	-1.703
-1.5311	-1.694
-1.5321	-1.697
-1.5331	-1.703
-1.5341	-1.7
-1.5351	-1.712
-1.5361	-1.709
-1.5371	-1.706
-1.5381	-1.703
-1.5391	-1.7
-1.5401	-1.709
-1.5411	-1.721
-1.5421	-1.715
-1.5431	-1.712
-1.5441	-1.706
-1.5451	-1.712
-1.5461	-1.718
-1.5471	-1.715
-1.5481	-1.724
-1.5491	-1.718
-1.5501	-1.712
-1.5511	-1.721
-1.5521	-1.718
-1.5531	-1.731
-1.5541	-1.728
-1.5551	-1.718
-1.5561	-1.721
-1.5571	-1.728
-1.5581	-1.724
-1.5591	-1.737
-1.5601	-1.728
-1.5611	-1.728
-1.5621	-1.731
-1.5631	-1.728
-1.5641	-1.734
-1.5651	-1.74
-1.5661	-1.737
-1.5671	-1.74
-1.5681	-1.731
-1.5691	-1.734
-1.5701	-1.74
-1.5711	-1.746
-1.5721	-1.743
-1.5731	-1.737
-1.5741	-1.743
-1.5751	-1.74
-1.5761	-1.746
-1.5771	-1.749
-1.5781	-1.752
-1.5791	-1.746
-1.5801	-1.743
-1.5811	-1.749
-1.5821	-1.743
-1.5831	-1.758
-1.5841	-1.758
-1.5851	-1.752
-1.5861	-1.749
-1.5871	-1.755
-1.5881	-1.755
-1.5891	-1.761
-1.5901	-1.761
-1.5911	-1.758
-1.5921	-1.755
-1.5931	-1.755
-1.5941	-1.758
-1.5951	-1.771
-1.5961	-1.764
-1.5971	-1.761
-1.5981	-1.758
-1.5991	-1.764
-1.6001	-1.764
-1.6011	-1.774
-1.6021	-1.768
-1.6031	-1.768
-1.6041	-1.761
-1.6051	-1.771
-1.6061	-1.764
-1.6071	-1.78
-1.6081	-1.774
-1.6091	-1.774
-1.6101	-1.768
-1.6111	-1.774
-1.6121	-1.774
-1.6131	-1.786
-1.6141	-1.777
-1.6151	-1.777
-1.6161	-1.774
-1.6171	-1.78
-1.6181	-1.777
-1.6191	-1.789
-1.6201	-1.786
-1.6211	-1.78
-1.6221	-1.78
-1.6231	-1.783
-1.6241	-1.777
-1.6251	-1.792
-1.6261	-1.795
-1.6271	-1.786
-1.6281	-1.786
-1.6291	-1.789
-1.6301	-1.786
-1.6311	-1.798
-1.6321	-1.789
-1.6331	-1.792
-1.6341	-1.789
-1.6351	-1.792
-1.6361	-1.792
-1.6371	-1.801
-1.6381	-1.798
-1.6391	-1.798
-1.6401	-1.792
-1.6411	-1.798
-1.6421	-1.798
-1.6431	-1.805
-1.6441	-1.805
-1.6451	-1.801
-1.6461	-1.795
-1.6471	-1.805
-1.6481	-1.801
-1.6491	-1.808
-1.6501	-1.808
-1.6511	-1.808
-1.6521	-1.801
-1.6531	-1.805
-1.6541	-1.805
-1.6551	-1.817
-1.6561	-1.811
-1.6571	-1.805
-1.6581	-1.808
-1.6591	-1.808
-1.6601	-1.814
-1.6611	-1.82
-1.6621	-1.811
-1.6631	-1.817
-1.6641	-1.811
-1.6651	-1.817
-1.6661	-1.817
-1.6671	-1.82
-1.6681	-1.823
-1.6691	-1.823
-1.6701	-1.814
-1.6711	-1.82
-1.6721	-1.817
-1.6731	-1.832
-1.6741	-1.826
-1.6751	-1.823
-1.6761	-1.823
-1.6771	-1.823
-1.6781	-1.823
-1.6791	-1.838
-1.6801	-1.829
-1.6811	-1.829
-1.6821	-1.823
-1.6831	-1.826
-1.6841	-1.826
-1.6851	-1.838
-1.6861	-1.832
-1.6871	-1.835
-1.6881	-1.835
-1.6891	-1.835
-1.6901	-1.829
-1.6911	-1.845
-1.6921	-1.838
-1.6931	-1.841
-1.6941	-1.838
-1.6951	-1.838
-1.6961	-1.835
-1.6971	-1.851
-1.6981	-1.845
-1.6991	-1.841
-1.7001	-1.841
-1.7011	-1.841
-1.7021	-1.848
-1.7031	-1.851
-1.7041	-1.845
-1.7051	-1.854
-1.7061	-1.845
-1.7071	-1.848
-1.7081	-1.848
-1.7091	-1.857
-1.7101	-1.857
-1.7111	-1.854
-1.7121	-1.848
-1.7131	-1.854
-1.7141	-1.857
-1.7151	-1.863
-1.7161	-1.86
-1.7171	-1.86
-1.7181	-1.857
-1.7191	-1.857
-1.7201	-1.857
-1.7211	-1.869
-1.7221	-1.863
-1.7231	-1.863
-1.7241	-1.863
-1.7251	-1.863
-1.7261	-1.863
-1.7271	-1.875
-1.7281	-1.869
-1.7291	-1.869
-1.7301	-1.869
-1.7311	-1.869
-1.7321	-1.869
-1.7331	-1.881
-1.7341	-1.872
-1.7351	-1.872
-1.7361	-1.872
-1.7371	-1.875
-1.7381	-1.869
-1.7391	-1.881
-1.7401	-1.885
-1.7411	-1.878
-1.7421	-1.878
-1.7431	-1.885
-1.7441	-1.875
-1.7451	-1.888
-1.7461	-1.885
-1.7471	-1.885
-1.7481	-1.885
-1.7491	-1.885
-1.7501	-1.885
-1.7511	-1.897
-1.7521	-1.888
-1.7531	-1.888
-1.7541	-1.888
-1.7551	-1.891
-1.7561	-1.891
-1.7571	-1.9
-1.7581	-1.894
-1.7591	-1.894
-1.7601	-1.891
-1.7611	-1.894
-1.7621	-1.9
-1.7631	-1.9
-1.7641	-1.903
-1.7651	-1.9
-1.7661	-1.897
-1.7671	-1.906
-1.7681	-1.9
-1.7691	-1.912
-1.7701	-1.906
-1.7711	-1.906
-1.7721	-1.903
-1.7731	-1.909
-1.7741	-1.903
-1.7751	-1.915
-1.7761	-1.909
-1.7771	-1.912
-1.7781	-1.906
-1.7791	-1.918
-1.7801	-1.909
-1.7811	-1.921
-1.7821	-1.918
-1.7831	-1.918
-1.7841	-1.912
-1.7851	-1.912
-1.7861	-1.921
-1.7871	-1.925
-1.7881	-1.925
-1.7891	-1.921
-1.7901	-1.921
-1.7911	-1.925
-1.7921	-1.918
-1.7931	-1.934
-1.7941	-1.921
-1.7951	-1.928
-1.7961	-1.928
-1.7971	-1.928
-1.7981	-1.931
-1.7991	-1.94
-1.8001	-1.928
-1.8011	-1.937
-1.8021	-1.931
-1.8031	-1.934
-1.8041	-1.937
-1.8051	-1.94
-1.8061	-1.943
-1.8071	-1.94
-1.8081	-1.931
-1.8091	-1.94
-1.8101	-1.94
-1.8111	-1.949
-1.8121	-1.946
-1.8131	-1.946
-1.8141	-1.943
-1.8151	-1.949
-1.8161	-1.943
-1.8171	-1.958
-1.8181	-1.952
-1.8191	-1.946
-1.8201	-1.952
-1.8211	-1.949
-1.8221	-1.955
-1.8231	-1.958
-1.8241	-1.961
-1.8251	-1.961
-1.8261	-1.955
-1.8271	-1.958
-1.8281	-1.958
-1.8291	-1.968
-1.8301	-1.965
-1.8311	-1.968
-1.8321	-1.958
-1.8331	-1.965
-1.8341	-1.961
-1.8351	-1.974
-1.8361	-1.968
-1.8371	-1.974
-1.8381	-1.968
-1.8391	-1.977
-1.8401	-1.968
-1.8411	-1.98
-1.8421	-1.98
-1.8431	-1.977
-1.8441	-1.977
-1.8451	-1.974
-1.8461	-1.977
-1.8471	-1.992
-1.8481	-1.98
-1.8491	-1.983
-1.8501	-1.98
-1.8511	-1.98
-1.8521	-1.983
-1.8531	-1.992
-1.8541	-1.992
-1.8551	-1.989
-1.8561	-1.992
-1.8571	-1.989
-1.8581	-1.989
-1.8591	-1.998
-1.8601	-1.998
-1.8611	-2.001
-1.8621	-1.989
-1.8631	-1.998
-1.8641	-1.998
-1.8651	-2.008
-1.8661	-2.008
-1.8671	-2.005
-1.8681	-2.001
-1.8691	-2.008
-1.8701	-2.001
-1.8711	-2.02
-1.8721	-2.011
-1.8731	-2.008
-1.8741	-2.008
-1.8751	-2.017
-1.8761	-2.014
-1.8771	-2.023
-1.8781	-2.02
-1.8791	-2.017
-1.8801	-2.017
-1.8811	-2.026
-1.8821	-2.02
-1.8831	-2.032
-1.8841	-2.029
-1.8851	-2.026
-1.8861	-2.026
-1.8871	-2.032
-1.8881	-2.023
-1.8891	-2.042
-1.8901	-2.035
-1.8911	-2.032
-1.8921	-2.038
-1.8931	-2.035
-1.8941	-2.042
-1.8951	-2.048
-1.8961	-2.045
-1.8971	-2.048
-1.8981	-2.038
-1.8991	-2.045
-1.9001	-2.048
-1.9011	-2.054
-1.9021	-2.054
-1.9031	-2.051
-1.9041	-2.054
-1.9051	-2.054
-1.9061	-2.051
-1.9071	-2.069
-1.9081	-2.063
-1.9091	-2.063
-1.9101	-2.06
-1.9111	-2.069
-1.9121	-2.06
-1.9131	-2.078
-1.9141	-2.072
-1.9151	-2.072
-1.9161	-2.069
-1.9171	-2.072
-1.9181	-2.072
-1.9191	-2.088
-1.9201	-2.082
-1.9211	-2.078
-1.9221	-2.082
-1.9231	-2.078
-1.9241	-2.085
-1.9251	-2.097
-1.9261	-2.091
-1.9271	-2.094
-1.9281	-2.088
-1.9291	-2.091
-1.9301	-2.094
-1.9311	-2.106
-1.9321	-2.103
-1.9331	-2.1
-1.9341	-2.1
-1.9351	-2.112
-1.9361	-2.1
-1.9371	-2.112
-1.9381	-2.112
-1.9391	-2.112
-1.9401	-2.106
-1.9411	-2.115
-1.9421	-2.112
-1.9431	-2.125
-1.9441	-2.125
-1.9451	-2.122
-1.9461	-2.122
-1.9471	-2.125
-1.9481	-2.122
-1.9491	-2.134
-1.9501	-2.134
-1.9511	-2.137
-1.9521	-2.128
-1.9531	-2.131
-1.9541	-2.134
-1.9551	-2.146
-1.9561	-2.146
-1.9571	-2.143
-1.9581	-2.143
-1.9591	-2.146
-1.9601	-2.14
-1.9611	-2.162
-1.9621	-2.152
-1.9631	-2.158
-1.9641	-2.152
-1.9651	-2.152
-1.9661	-2.152
-1.9671	-2.168
-1.9681	-2.168
-1.9691	-2.168
-1.9701	-2.162
-1.9711	-2.171
-1.9721	-2.165
-1.9731	-2.177
-1.9741	-2.18
-1.9751	-2.18
-1.9761	-2.171
-1.9771	-2.177
-1.9781	-2.171
-1.9791	-2.192
-1.9801	-2.186
-1.9811	-2.192
-1.9821	-2.186
-1.9831	-2.189
-1.9841	-2.186
-1.9851	-2.205
-1.9861	-2.192
-1.9871	-2.198
-1.9881	-2.195
-1.9891	-2.202
-1.9901	-2.195
-1.9911	-2.208
-1.9921	-2.208
-1.9931	-2.214
-1.9941	-2.205
-1.9951	-2.214
-1.9961	-2.211
-1.9971	-2.22
-1.9981	-2.22
-1.9991	-2.223
-2.0001	-2.217
-2.0011	-2.223
-2.0021	-2.22
-2.0031	-2.229
-2.0041	-2.232
-2.0051	-2.235
-2.0061	-2.232
-2.0071	-2.235
-2.0081	-2.226
-2.0091	-2.248
-2.0101	-2.242
-2.0111	-2.242
-2.0121	-2.242
-2.0131	-2.245
-2.0141	-2.245
-2.0151	-2.26
-2.0161	-2.248
-2.0171	-2.257
-2.0181	-2.251
-2.0191	-2.251
-2.0201	-2.254
-2.0211	-2.269
-2.0221	-2.266
-2.0231	-2.269
-2.0241	-2.26
-2.0251	-2.266
-2.0261	-2.266
-2.0271	-2.275
-2.0281	-2.279
-2.0291	-2.279
-2.0301	-2.272
-2.0311	-2.275
-2.0321	-2.275
-2.0331	-2.291
-2.0341	-2.285
-2.0351	-2.288
-2.0361	-2.282
-2.0371	-2.285
-2.0381	-2.288
-2.0391	-2.303
-2.0401	-2.294
-2.0411	-2.294
-2.0421	-2.294
-2.0431	-2.303
-2.0441	-2.303
-2.0451	-2.309
-2.0461	-2.306
-2.0471	-2.309
-2.0481	-2.306
-2.0491	-2.315
-2.0501	-2.303
-2.0511	-2.322
-2.0521	-2.319
-2.0531	-2.319
-2.0541	-2.322
-2.0551	-2.319
-2.0561	-2.312
-2.0571	-2.334
-2.0581	-2.328
-2.0591	-2.331
-2.0601	-2.328
-2.0611	-2.334
-2.0621	-2.328
-2.0631	-2.343
-2.0641	-2.34
-2.0651	-2.34
-2.0661	-2.337
-2.0671	-2.34
-2.0681	-2.34
-2.0691	-2.355
-2.0701	-2.349
-2.0711	-2.355
-2.0721	-2.346
-2.0731	-2.352
-2.0741	-2.355
-2.0751	-2.362
-2.0761	-2.362
-2.0771	-2.365
-2.0781	-2.359
-2.0791	-2.362
-2.0801	-2.355
-2.0811	-2.374
-2.0821	-2.377
-2.0831	-2.371
-2.0841	-2.368
-2.0851	-2.374
-2.0861	-2.374
-2.0871	-2.386
-2.0881	-2.38
-2.0891	-2.383
-2.0901	-2.38
-2.0911	-2.383
-2.0921	-2.383
-2.0931	-2.392
-2.0941	-2.389
-2.0951	-2.392
-2.0961	-2.389
-2.0971	-2.402
-2.0981	-2.392
-2.0991	-2.405
-2.1001	-2.408
-2.1011	-2.399
-2.1021	-2.399
-2.1031	-2.411
-2.1041	-2.402
-2.1051	-2.42
-2.1061	-2.411
-2.1071	-2.414
-2.1081	-2.414
-2.1091	-2.417
-2.1101	-2.414
-2.1111	-2.426
-2.1121	-2.426
-2.1131	-2.423
-2.1141	-2.429
-2.1151	-2.426
-2.1161	-2.426
-2.1171	-2.439
-2.1181	-2.429
-2.1191	-2.439
-2.1201	-2.429
-2.1211	-2.435
-2.1221	-2.435
-2.1231	-2.451
-2.1241	-2.445
-2.1251	-2.451
-2.1261	-2.439
-2.1271	-2.448
-2.1281	-2.445
-2.1291	-2.457
-2.1301	-2.46
-2.1311	-2.472
-2.1321	-2.454
-2.1331	-2.457
-2.1341	-2.454
-2.1351	-2.472
-2.1361	-2.463
-2.1371	-2.469
-2.1381	-2.46
-2.1391	-2.466
-2.1401	-2.466
-2.1411	-2.479
-2.1421	-2.482
-2.1431	-2.482
-2.1441	-2.472
-2.1451	-2.479
-2.1461	-2.476
-2.1471	-2.488
-2.1481	-2.488
-2.1491	-2.485
-2.1501	-2.485
-2.1511	-2.491
-2.1521	-2.491
-2.1531	-2.5
-2.1541	-2.497
-2.1551	-2.497
-2.1561	-2.497
-2.1571	-2.497
-2.1581	-2.497
-2.1591	-2.512
-2.1601	-2.503
-2.1611	-2.509
-2.1621	-2.506
-2.1631	-2.509
-2.1641	-2.509
-2.1651	-2.522
-2.1661	-2.519
-2.1671	-2.522
-2.1681	-2.509
-2.1691	-2.519
-2.1701	-2.516
-2.1711	-2.528
-2.1721	-2.528
-2.1731	-2.531
-2.1741	-2.525
-2.1751	-2.531
-2.1761	-2.528
-2.1771	-2.54
-2.1781	-2.537
-2.1791	-2.537
-2.1801	-2.54
-2.1811	-2.537
-2.1821	-2.534
-2.1831	-2.556
-2.1841	-2.546
-2.1851	-2.552
-2.1861	-2.546
-2.1871	-2.549
-2.1881	-2.546
-2.1891	-2.565
-2.1901	-2.556
-2.1911	-2.562
-2.1921	-2.556
-2.1931	-2.559
-2.1941	-2.556
-2.1951	-2.571
-2.1961	-2.571
-2.1971	-2.565
-2.1981	-2.565
-2.1991	-2.574
-2.2001	-2.568
-2.2011	-2.58
-2.2021	-2.58
-2.2031	-2.577
-2.2041	-2.574
-2.2051	-2.583
-2.2061	-2.574
-2.2071	-2.602
-2.2081	-2.58
-2.2091	-2.589
-2.2101	-2.589
-2.2111	-2.586
-2.2121	-2.592
-2.2131	-2.605
-2.2141	-2.596
-2.2151	-2.599
-2.2161	-2.599
-2.2171	-2.602
-2.2181	-2.599
-2.2191	-2.611
-2.2201	-2.608
-2.2211	-2.608
-2.2221	-2.608
-2.2231	-2.614
-2.2241	-2.605
-2.2251	-2.626
-2.2261	-2.617
-2.2271	-2.623
-2.2281	-2.617
-2.2291	-2.623
-2.2301	-2.62
-2.2311	-2.632
-2.2321	-2.629
-2.2331	-2.636
-2.2341	-2.629
-2.2351	-2.636
-2.2361	-2.626
-2.2371	-2.648
-2.2381	-2.642
-2.2391	-2.642
-2.2401	-2.639
-2.2411	-2.642
-2.2421	-2.639
-2.2431	-2.654
-2.2441	-2.657
-2.2451	-2.657
-2.2461	-2.648
-2.2471	-2.654
-2.2481	-2.648
-2.2491	-2.666
-2.2501	-2.663
-2.2511	-2.663
-2.2521	-2.657
-2.2531	-2.663
-2.2541	-2.66
-2.2551	-2.679
-2.2561	-2.673
-2.2571	-2.673
-2.2581	-2.669
-2.2591	-2.669
-2.2601	-2.673
-2.2611	-2.685
-2.2621	-2.685
-2.2631	-2.688
-2.2641	-2.676
-2.2651	-2.688
-2.2661	-2.682
-2.2671	-2.697
-2.2681	-2.688
-2.2691	-2.694
-2.2701	-2.691
-2.2711	-2.697
-2.2721	-2.691
-2.2731	-2.706
-2.2741	-2.703
-2.2751	-2.7
-2.2761	-2.703
-2.2771	-2.706
-2.2781	-2.7
-2.2791	-2.722
-2.2801	-2.709
-2.2811	-2.716
-2.2821	-2.713
-2.2831	-2.716
-2.2841	-2.713
-2.2851	-2.725
-2.2861	-2.722
-2.2871	-2.734
-2.2881	-2.719
-2.2891	-2.728
-2.2901	-2.725
-2.2911	-2.737
-2.2921	-2.731
-2.2931	-2.74
-2.2941	-2.734
-2.2951	-2.737
-2.2961	-2.734
-2.2971	-2.749
-2.2981	-2.743
-2.2991	-2.746
-2.3001	-2.746
-2.3011	-2.746
-2.3021	-2.749
-2.3031	-2.762
-2.3041	-2.759
-2.3051	-2.762
-2.3061	-2.756
-2.3071	-2.759
-2.3081	-2.753
-2.3091	-2.774
-2.3101	-2.765
-2.3111	-2.774
-2.3121	-2.765
-2.3131	-2.768
-2.3141	-2.768
-2.3151	-2.783
-2.3161	-2.777
-2.3171	-2.783
-2.3181	-2.774
-2.3191	-2.78
-2.3201	-2.777
-2.3211	-2.793
-2.3221	-2.793
-2.3231	-2.786
-2.3241	-2.786
-2.3251	-2.783
-2.3261	-2.796
-2.3271	-2.805
-2.3281	-2.799
-2.3291	-2.805
-2.3301	-2.796
-2.3311	-2.799
-2.3321	-2.805
-2.3331	-2.817
-2.3341	-2.811
-2.3351	-2.814
-2.3361	-2.808
-2.3371	-2.814
-2.3381	-2.814
-2.3391	-2.826
-2.3401	-2.823
-2.3411	-2.823
-2.3421	-2.823
-2.3431	-2.826
-2.3441	-2.82
-2.3451	-2.845
-2.3461	-2.833
-2.3471	-2.839
-2.3481	-2.833
-2.3491	-2.836
-2.3501	-2.829
-2.3511	-2.851
-2.3521	-2.845
-2.3531	-2.851
-2.3541	-2.842
-2.3551	-2.848
-2.3561	-2.848
-2.3571	-2.86
-2.3581	-2.851
-2.3591	-2.866
-2.3601	-2.857
-2.3611	-2.86
-2.3621	-2.854
-2.3631	-2.869
-2.3641	-2.873
-2.3651	-2.873
-2.3661	-2.866
-2.3671	-2.866
-2.3681	-2.863
-2.3691	-2.885
-2.3701	-2.885
-2.3711	-2.876
-2.3721	-2.885
-2.3731	-2.882
-2.3741	-2.876
-2.3751	-2.897
-2.3761	-2.894
-2.3771	-2.894
-2.3781	-2.888
-2.3791	-2.891
-2.3801	-2.894
-2.3811	-2.913
-2.3821	-2.897
-2.3831	-2.913
-2.3841	-2.9
-2.3851	-2.906
-2.3861	-2.906
-2.3871	-2.916
-2.3881	-2.913
-2.3891	-2.916
-2.3901	-2.916
-2.3911	-2.922
-2.3921	-2.916
-2.3931	-2.934
-2.3941	-2.931
-2.3951	-2.928
-2.3961	-2.925
-2.3971	-2.937
-2.3981	-2.922
-2.3991	-2.946
-2.4001	-2.937
-2.4011	-2.943
-2.4021	-2.943
-2.4031	-2.943
-2.4041	-2.94
-2.4051	-2.956
-2.4061	-2.953
-2.4071	-2.959
-2.4081	-2.95
-2.4091	-2.959
-2.4101	-2.959
-2.4111	-2.971
-2.4121	-2.968
-2.4131	-2.968
-2.4141	-2.962
-2.4151	-2.974
-2.4161	-2.971
-2.4171	-2.98
-2.4181	-2.983
-2.4191	-2.983
-2.4201	-2.977
-2.4211	-2.983
-2.4221	-2.983
-2.4231	-2.999
-2.4241	-2.996
-2.4251	-2.999
-2.4261	-2.99
-2.4271	-2.996
-2.4281	-2.996
-2.4291	-3.014
-2.4301	-3.008
-2.4311	-3.008
-2.4321	-3.011
-2.4331	-3.014
-2.4341	-3.011
-2.4351	-3.03
-2.4361	-3.023
-2.4371	-3.03
-2.4381	-3.023
-2.4391	-3.033
-2.4401	-3.03
-2.4411	-3.042
-2.4421	-3.042
-2.4431	-3.042
-2.4441	-3.045
-2.4451	-3.045
-2.4461	-3.045
-2.4471	-3.057
-2.4481	-3.054
-2.4491	-3.063
-2.4501	-3.057
-2.4511	-3.06
-2.4521	-3.06
-2.4531	-3.079
-2.4541	-3.079
-2.4551	-3.079
-2.4561	-3.073
-2.4571	-3.085
-2.4581	-3.079
-2.4591	-3.094
-2.4601	-3.094
-2.4611	-3.103
-2.4621	-3.097
-2.4631	-3.103
-2.4641	-3.094
-2.4651	-3.122
-2.4661	-3.116
-2.4671	-3.116
-2.4681	-3.122
-2.4691	-3.119
-2.4701	-3.122
-2.4711	-3.147
-2.4721	-3.137
-2.4731	-3.14
-2.4741	-3.14
-2.4751	-3.14
-2.4761	-3.147
-2.4771	-3.162
-2.4781	-3.159
-2.4791	-3.171
-2.4801	-3.156
-2.4811	-3.171
-2.4821	-3.165
-2.4831	-3.187
-2.4841	-3.19
-2.4851	-3.193
-2.4861	-3.183
-2.4871	-3.199
-2.4881	-3.193
-2.4891	-3.211
-2.4901	-3.214
-2.4911	-3.217
-2.4921	-3.214
-2.4931	-3.223
-2.4941	-3.223
-2.4951	-3.242
-2.4961	-3.239
-2.4971	-3.248
-2.4981	-3.242
-2.4991	-3.254
-2.5001	-3.251
-2.5011	-3.27
-2.5021	-3.27
-2.5031	-3.279
-2.5041	-3.273
-2.5051	-3.282
-2.5061	-3.288
-2.5071	-3.3
-2.5081	-3.307
-2.5091	-3.316
-2.5101	-3.31
-2.5111	-3.322
-2.5121	-3.322
-2.5131	-3.344
-2.5141	-3.344
-2.5151	-3.353
-2.5161	-3.35
-2.5171	-3.362
-2.5181	-3.356
-2.5191	-3.384
-2.5201	-3.384
-2.5211	-3.39
-2.5221	-3.396
-2.5231	-3.399
-2.5241	-3.405
-2.5251	-3.427
-2.5261	-3.43
-2.5271	-3.439
-2.5281	-3.442
-2.5291	-3.448
-2.5301	-3.457
-2.5311	-3.479
-2.5321	-3.488
-2.5331	-3.491
-2.5341	-3.491
-2.5351	-3.51
-2.5361	-3.519
-2.5371	-3.537
-2.5381	-3.544
-2.5391	-3.55
-2.5401	-3.565
-2.5411	-3.584
-2.5421	-3.584
-2.5431	-3.611
-2.5441	-3.614
-2.5451	-3.63
-2.5461	-3.63
-2.5471	-3.648
-2.5481	-3.657
-2.5491	-3.685
-2.5501	-3.697
-2.5511	-3.713
-2.5521	-3.71
-2.5531	-3.737
-2.5541	-3.744
-2.5551	-3.774
-2.5561	-3.787
-2.5571	-3.808
-2.5581	-3.818
-2.5591	-3.836
-2.5601	-3.854
-2.5611	-3.885
-2.5621	-3.904
-2.5631	-3.916
-2.5641	-3.934
-2.5651	-3.959
-2.5661	-3.975
-2.5671	-4.018
-2.5681	-4.03
-2.5691	-4.061
-2.5701	-4.079
-2.5711	-4.101
-2.5721	-4.131
-2.5731	-4.168
-2.5741	-4.193
-2.5751	-4.227
-2.5761	-4.242
-2.5771	-4.279
-2.5781	-4.31
-2.5791	-4.35
-2.5801	-4.39
-2.5811	-4.418
-2.5821	-4.445
-2.5831	-4.485
-2.5841	-4.522
-2.5851	-4.578
-2.5861	-4.615
-2.5871	-4.658
-2.5881	-4.692
-2.5891	-4.738
-2.5901	-4.781
-2.5911	-4.849
-2.5921	-4.889
-2.5931	-4.941
-2.5941	-4.984
-2.5951	-5.043
-2.5961	-5.098
-2.5971	-5.166
-2.5981	-5.218
-2.5991	-5.286
-2.6001	-5.332
-2.6011	-5.4
-2.6021	-5.464
-2.6031	-5.541
-2.6041	-5.609
-2.6051	-5.68
-2.6061	-5.741
-2.6071	-5.824
-2.6081	-5.892
-2.6091	-5.988
-2.6101	-6.061
-2.6111	-6.154
-2.6121	-6.228
-2.6131	-6.314
-2.6141	-6.4
-2.6151	-6.511
-2.6161	-6.603
-2.6171	-6.692
-2.6181	-6.785
-2.6191	-6.886
-2.6201	-6.976
-2.6211	-7.099
-2.6221	-7.197
-2.6231	-7.308
-2.6241	-7.416
-2.6251	-7.533
-2.6261	-7.634
-2.6271	-7.767
-2.6281	-7.884
-2.6291	-8.01
-2.6301	-8.114
-2.6311	-8.238
-2.6321	-8.364
-2.6331	-8.508
-2.6341	-8.628
-2.6351	-8.764
-2.6361	-8.887
-2.6371	-9.016
-2.6381	-9.158
-2.6391	-9.309
-2.6401	-9.438
-2.6411	-9.583
-2.6421	-9.706
-2.6431	-9.857
-2.6441	-10
-2.6451	-10.15
-2.6461	-10.29
-2.6471	-10.44
-2.6481	-10.57
-2.6491	-10.72
-2.6501	-10.87
-2.6511	-11.02
-2.6521	-11.17
-2.6531	-11.31
-2.6541	-11.44
-2.6551	-11.6
-2.6561	-11.73
-2.6571	-11.89
-2.6581	-12.04
-2.6591	-12.17
-2.6601	-12.31
-2.6611	-12.45
-2.6621	-12.59
-2.6631	-12.74
-2.6641	-12.86
-2.6651	-13.01
-2.6661	-13.13
-2.6671	-13.26
-2.6681	-13.4
-2.6691	-13.53
-2.6701	-13.65
-2.6711	-13.78
-2.6721	-13.89
-2.6731	-14.02
-2.6741	-14.12
-2.6751	-14.25
-2.6761	-14.36
-2.6771	-14.47
-2.6781	-14.57
-2.6791	-14.69
-2.6801	-14.77
-2.6811	-14.89
-2.6821	-14.98
-2.6831	-15.08
-2.6841	-15.15
-2.6851	-15.24
-2.6861	-15.32
-2.6871	-15.42
-2.6881	-15.5
-2.6891	-15.58
-2.6901	-15.63
-2.6911	-15.7
-2.6921	-15.77
-2.6931	-15.85
-2.6941	-15.9
-2.6951	-15.96
-2.6961	-16
-2.6971	-16.06
-2.6981	-16.1
-2.6991	-16.16
-2.7001	-16.2
-2.7011	-16.24
-2.7021	-16.26
-2.7031	-16.3
-2.7041	-16.32
-2.7051	-16.37
-2.7061	-16.39
-2.7071	-16.4
-2.7081	-16.41
-2.7091	-16.43
-2.7101	-16.44
-2.7111	-16.47
-2.7121	-16.47
-2.7131	-16.48
-2.7141	-16.48
-2.7151	-16.48
-2.7161	-16.48
-2.7171	-16.49
-2.7181	-16.48
-2.7191	-16.48
-2.7201	-16.46
-2.7211	-16.46
-2.7221	-16.44
-2.7231	-16.44
-2.7241	-16.43
-2.7251	-16.41
-2.7261	-16.39
-2.7271	-16.38
-2.7281	-16.35
-2.7291	-16.35
-2.7301	-16.32
-2.7311	-16.31
-2.7321	-16.27
-2.7331	-16.25
-2.7341	-16.22
-2.7351	-16.22
-2.7361	-16.18
-2.7371	-16.16
-2.7381	-16.13
-2.7391	-16.1
-2.7401	-16.07
-2.7411	-16.06
-2.7421	-16.02
-2.7431	-16
-2.7441	-15.95
-2.7451	-15.93
-2.7461	-15.89
-2.7471	-15.89
-2.7481	-15.85
-2.7491	-15.82
-2.7501	-15.78
-2.7511	-15.76
-2.7521	-15.72
-2.7531	-15.71
-2.7541	-15.67
-2.7551	-15.64
-2.7561	-15.6
-2.7571	-15.58
-2.7581	-15.54
-2.7591	-15.53
-2.7601	-15.49
-2.7611	-15.46
-2.7621	-15.42
-2.7631	-15.4
-2.7641	-15.37
-2.7651	-15.35
-2.7661	-15.32
-2.7671	-15.29
-2.7681	-15.25
-2.7691	-15.24
-2.7701	-15.2
-2.7711	-15.18
-2.7721	-15.15
-2.7731	-15.13
-2.7741	-15.09
-2.7751	-15.07
-2.7761	-15.03
-2.7771	-15.03
-2.7781	-14.99
-2.7791	-14.96
-2.7801	-14.94
-2.7811	-14.91
-2.7821	-14.88
-2.7831	-14.87
-2.7841	-14.84
-2.7851	-14.82
-2.7861	-14.79
-2.7871	-14.77
-2.7881	-14.74
-2.7891	-14.74
-2.7901	-14.7
-2.7911	-14.69
-2.7921	-14.65
-2.7931	-14.63
-2.7941	-14.61
-2.7951	-14.6
-2.7961	-14.58
-2.7971	-14.55
-2.7981	-14.53
-2.7991	-14.5
-2.8001	-14.49
-2.8011	-14.48
-2.8021	-14.46
-2.8031	-14.44
-2.8041	-14.41
-2.8051	-14.4
-2.8061	-14.38
-2.8071	-14.38
-2.8081	-14.35
-2.8091	-14.33
-2.8101	-14.31
-2.8111	-14.29
-2.8121	-14.27
-2.8131	-14.28
-2.8141	-14.25
-2.8151	-14.24
-2.8161	-14.21
-2.8171	-14.2
-2.8181	-14.18
-2.8191	-14.18
-2.8201	-14.16
-2.8211	-14.15
-2.8221	-14.13
-2.8231	-14.12
-2.8241	-14.1
-2.8251	-14.1
-2.8261	-14.09
-2.8271	-14.08
-2.8281	-14.06
-2.8291	-14.05
-2.8301	-14.03
-2.8311	-14.04
-2.8321	-14.02
-2.8331	-14.01
-2.8341	-13.99
-2.8351	-13.99
-2.8361	-13.97
-2.8371	-13.97
-2.8381	-13.96
-2.8391	-13.96
-2.8401	-13.94
-2.8411	-13.94
-2.8421	-13.92
-2.8431	-13.93
-2.8441	-13.92
-2.8451	-13.91
-2.8461	-13.9
-2.8471	-13.89
-2.8481	-13.89
-2.8491	-13.89
-2.8501	-13.88
-2.8511	-13.89
-2.8521	-13.87
-2.8531	-13.86
-2.8541	-13.86
-2.8551	-13.87
-2.8561	-13.86
-2.8571	-13.87
-2.8581	-13.85
-2.8591	-13.84
-2.8601	-13.85
-2.8611	-13.85
-2.8621	-13.85
-2.8631	-13.85
-2.8641	-13.84
-2.8651	-13.85
-2.8661	-13.85
-2.8671	-13.86
-2.8681	-13.86
-2.8691	-13.86
-2.8701	-13.85
-2.8711	-13.86
-2.8721	-13.86
-2.8731	-13.88
-2.8741	-13.88
-2.8751	-13.88
-2.8761	-13.88
-2.8771	-13.9
-2.8781	-13.89
-2.8791	-13.93
-2.8801	-13.92
-2.8811	-13.93
-2.8821	-13.93
-2.8831	-13.94
-2.8841	-13.96
-2.8851	-13.98
-2.8861	-13.98
-2.8871	-14
-2.8881	-14
-2.8891	-14.02
-2.8901	-14.03
-2.8911	-14.06
-2.8921	-14.07
-2.8931	-14.1
-2.8941	-14.1
-2.8951	-14.13
-2.8961	-14.14
-2.8971	-14.18
-2.8981	-14.19
-2.8991	-14.22
-2.9001	-14.23
-2.9011	-14.26
-2.9021	-13.96
-2.9011	-13.18
-2.9001	-12.92
-2.8991	-12.75
-2.8981	-12.59
-2.8971	-12.46
-2.8961	-12.33
-2.8951	-12.23
-2.8941	-12.12
-2.8931	-12.01
-2.8921	-11.9
-2.8911	-11.81
-2.8901	-11.72
-2.8891	-11.64
-2.8881	-11.55
-2.8871	-11.46
-2.8861	-11.38
-2.8851	-11.3
-2.8841	-11.22
-2.8831	-11.16
-2.8821	-11.08
-2.8811	-11.01
-2.8801	-10.93
-2.8791	-10.87
-2.8781	-10.81
-2.8771	-10.75
-2.8761	-10.68
-2.8751	-10.63
-2.8741	-10.55
-2.8731	-10.51
-2.8721	-10.44
-2.8711	-10.4
-2.8701	-10.34
-2.8691	-10.29
-2.8681	-10.23
-2.8671	-10.18
-2.8661	-10.12
-2.8651	-10.09
-2.8641	-10.04
-2.8631	-9.989
-2.8621	-9.937
-2.8611	-9.897
-2.8601	-9.847
-2.8591	-9.817
-2.8581	-9.764
-2.8571	-9.73
-2.8561	-9.675
-2.8551	-9.641
-2.8541	-9.598
-2.8531	-9.567
-2.8521	-9.524
-2.8511	-9.493
-2.8501	-9.438
-2.8491	-9.41
-2.8481	-9.361
-2.8471	-9.343
-2.8461	-9.306
-2.8451	-9.269
-2.8441	-9.229
-2.8431	-9.198
-2.8421	-9.161
-2.8411	-9.143
-2.8401	-9.102
-2.8391	-9.075
-2.8381	-9.032
-2.8371	-9.001
-2.8361	-8.973
-2.8351	-8.961
-2.8341	-8.921
-2.8331	-8.893
-2.8321	-8.85
-2.8311	-8.825
-2.8301	-8.795
-2.8291	-8.782
-2.8281	-8.745
-2.8271	-8.721
-2.8261	-8.684
-2.8251	-8.659
-2.8241	-8.632
-2.8231	-8.619
-2.8221	-8.582
-2.8211	-8.558
-2.8201	-8.527
-2.8191	-8.502
-2.8181	-8.478
-2.8171	-8.465
-2.8161	-8.431
-2.8151	-8.41
-2.8141	-8.373
-2.8131	-8.364
-2.8121	-8.327
-2.8111	-8.318
-2.8101	-8.29
-2.8091	-8.271
-2.8081	-8.234
-2.8071	-8.216
-2.8061	-8.191
-2.8051	-8.179
-2.8041	-8.151
-2.8031	-8.127
-2.8021	-8.099
-2.8011	-8.081
-2.8001	-8.056
-2.7991	-8.047
-2.7981	-8.022
-2.7971	-8.001
-2.7961	-7.97
-2.7951	-7.951
-2.7941	-7.927
-2.7931	-7.924
-2.7921	-7.89
-2.7911	-7.874
-2.7901	-7.837
-2.7891	-7.822
-2.7881	-7.797
-2.7871	-7.797
-2.7861	-7.76
-2.7851	-7.751
-2.7841	-7.714
-2.7831	-7.699
-2.7821	-7.674
-2.7811	-7.668
-2.7801	-7.644
-2.7791	-7.622
-2.7781	-7.591
-2.7771	-7.573
-2.7761	-7.551
-2.7751	-7.548
-2.7741	-7.52
-2.7731	-7.499
-2.7721	-7.468
-2.7711	-7.456
-2.7701	-7.428
-2.7691	-7.425
-2.7681	-7.397
-2.7671	-7.376
-2.7661	-7.345
-2.7651	-7.326
-2.7641	-7.302
-2.7631	-7.305
-2.7621	-7.265
-2.7611	-7.25
-2.7601	-7.216
-2.7591	-7.203
-2.7581	-7.179
-2.7571	-7.166
-2.7561	-7.142
-2.7551	-7.117
-2.7541	-7.077
-2.7531	-7.068
-2.7521	-7.04
-2.7511	-7.022
-2.7501	-7
-2.7491	-6.976
-2.7481	-6.942
[truncated: 5,219 more rows]
